# Supplementary material for: Examining Socioeconomic and Computational Aspects of Vaccine Pharmacovigilance
Source: Biomed Res Int. 2019 Feb 19;2019:6576483. doi: 10.1155/2019/6576483 (PMC6399563; doi:10.1155/2019/6576483)
Supplement: Supplementary 2 — File name and format: Additional_File_2.txt. Title: Symptom over-representation in drug interference VAEs. Description: Tab separated file containing the name of each reaction (event_symptom_reaction), the total number of VAE cases the reaction was reported in (event_count), the total number of cases that the reaction was reported in drug interference VAEs (event_count_in_drug_interference_vaes), respective contingency matrix 1 values (a, b, c, d), the respective PRR score and 95% confidence interval (prr, prr_95ci_min, prr_95ci_max), and the respective Fisher's two-tailed test p-value and if it is <0.05 (pvalue_fisher_exact_test_two_tailed, significant_by_fisher_exact_test). [file 6576483.f2.zip]

Archive with 1 entries (1 files):
- Additional_File_2.txt
