# Supplementary material for: Examining Socioeconomic and Computational Aspects of Vaccine Pharmacovigilance
Source: Biomed Res Int. 2019 Feb 19;2019:6576483. doi: 10.1155/2019/6576483 (PMC6399563; doi:10.1155/2019/6576483)
Supplement: Supplementary 2 — File name and format: Additional_File_2.txt. Title: Symptom over-representation in drug interference VAEs. Description: Tab separated file containing the name of each reaction (event_symptom_reaction), the total number of VAE cases the reaction was reported in (event_count), the total number of cases that the reaction was reported in drug interference VAEs (event_count_in_drug_interference_vaes), respective contingency matrix 1 values (a, b, c, d), the respective PRR score and 95% confidence interval (prr, prr_95ci_min, prr_95ci_max), and the respective Fisher's two-tailed test p-value and if it is <0.05 (pvalue_fisher_exact_test_two_tailed, significant_by_fisher_exact_test). [file 6576483.f2.zip › Additional_File_2.txt]

event_symptom_reaction	event_count	event_count_in_drug_interference_vaes	a	b	c	d	prr	prr_95ci_min	prr_95ci_max	pvalue_fisher_exact_test_two_tailed	significant_by_fisher_exact_test
ABASIA	1681	262	262	53637	1419	551905	1.89547	1.66192	2.16185	0.00000	True
ABDOMEN SCAN	15	4	4	53895	11	553313	3.73307	1.18871	11.72344	0.03822	True
ABDOMEN SCAN NORMAL	34	1	1	53898	33	553291	0.31109	0.04255	2.27454	0.36260	False
ABDOMINAL CAVITY DRAINAGE	1	1	1	53898	0	553324	-100.00000	-100.00000	-100.00000	0.08876	False
ABDOMINAL COMPARTMENT SYNDROME	2	1	1	53898	1	553323	10.26594	0.64210	164.13287	0.16965	False
ABDOMINAL DISCOMFORT	1280	215	215	53684	1065	552259	2.07247	1.79044	2.39891	0.00000	True
ABDOMINAL DISTENSION	744	85	85	53814	659	552665	1.32414	1.05659	1.65943	0.01691	True
ABDOMINAL HERNIA	2	1	1	53898	1	553323	10.26594	0.64210	164.13287	0.16965	False
ABDOMINAL HERNIA REPAIR	2	1	1	53898	1	553323	10.26594	0.64210	164.13287	0.16965	False
ABDOMINAL INJURY	6	1	1	53898	5	553319	2.05319	0.23987	17.57448	0.42749	False
ABDOMINAL MASS	108	4	4	53895	104	553220	0.39484	0.14545	1.07183	0.06128	False
ABDOMINAL PAIN	6739	620	620	53279	6119	547205	1.04018	0.95817	1.12922	0.34336	False
ABDOMINAL PAIN LOWER	222	30	30	53869	192	553132	1.60405	1.09182	2.35660	0.02386	True
ABDOMINAL PAIN UPPER	3450	424	424	53475	3026	550298	1.43845	1.29994	1.59173	0.00000	True
ABDOMINAL RIGIDITY	54	8	8	53891	46	553278	1.78538	0.84272	3.78251	0.14411	False
ABDOMINAL TENDERNESS	93	13	13	53886	80	553244	1.66822	0.92840	2.99756	0.09749	False
ABDOMINAL WOUND DEHISCENCE	3	1	1	53898	2	553322	5.13297	0.46543	56.60902	0.24335	False
ABDOMINAL X-RAY	479	30	30	53869	449	552875	0.68592	0.47403	0.99254	0.04422	True
ABNORMAL BEHAVIOUR	2166	110	110	53789	2056	551268	0.54925	0.45348	0.66525	0.00000	True
ABNORMAL DREAMS	115	13	13	53886	102	553222	1.30840	0.73467	2.33019	0.32656	False
ABNORMAL FAECES	353	23	23	53876	330	552994	0.71551	0.46890	1.09180	0.13356	False
ABNORMAL LABOUR	42	5	5	53894	37	553287	1.38729	0.54526	3.52965	0.41818	False
ABNORMAL LOSS OF WEIGHT	30	5	5	53894	25	553299	2.05319	0.78603	5.36316	0.18378	False
ABNORMAL SENSATION IN EYE	91	15	15	53884	76	553248	2.02617	1.16469	3.52486	0.01610	True
ABNORMAL SLEEP-RELATED EVENT	39	5	5	53894	34	553290	1.50970	0.59047	3.85992	0.39025	False
ABORTION	386	13	13	53886	373	552951	0.35779	0.20583	0.62197	0.00003	True
ABORTION COMPLETE	6	1	1	53898	5	553319	2.05319	0.23987	17.57448	0.42749	False
ABORTION INDUCED	250	13	13	53886	237	553087	0.56311	0.32222	0.98410	0.04421	True
ABORTION MISSED	46	3	3	53896	43	553281	0.71623	0.22221	2.30857	0.79576	False
ABORTION SPONTANEOUS	910	33	33	53866	877	552447	0.38629	0.27291	0.54677	0.00000	True
ABORTION THREATENED	22	3	3	53896	19	553305	1.62094	0.47968	5.47747	0.43912	False
ABSCESS	836	57	57	53842	779	552545	0.75117	0.57412	0.98281	0.03824	True
ABSCESS DRAINAGE	135	7	7	53892	128	553196	0.56142	0.26236	1.20136	0.17063	False
ABSCESS LIMB	62	6	6	53893	56	553268	1.09992	0.47395	2.55266	0.82171	False
ABSCESS NECK	6	1	1	53898	5	553319	2.05319	0.23987	17.57448	0.42749	False
ABSCESS ORAL	5	1	1	53898	4	553320	2.56649	0.28685	22.96259	0.37172	False
ABSCESS STERILE	28	1	1	53898	27	553297	0.38022	0.05167	2.79810	0.51001	False
ACARODERMATITIS	14	2	2	53897	12	553312	1.71099	0.38294	7.64476	0.35667	False
ACCELERATED HYPERTENSION	2	2	2	53897	0	553324	-100.00000	-100.00000	-100.00000	0.00788	True
ACCESSORY NERVE DISORDER	2	1	1	53898	1	553323	10.26594	0.64210	164.13287	0.16965	False
ACCESSORY SPLEEN	1	1	1	53898	0	553324	-100.00000	-100.00000	-100.00000	0.08876	False
ACCIDENT	26	3	3	53896	23	553301	1.33904	0.40206	4.45962	0.49895	False
ACCIDENTAL EXPOSURE	304	17	17	53882	287	553037	0.60809	0.37284	0.99176	0.04326	True
ACCIDENTAL EXPOSURE TO PRODUCT	212	5	5	53894	207	553117	0.24797	0.10213	0.60204	0.00023	True
ACCIDENTAL OVERDOSE	174	10	10	53889	164	553160	0.62597	0.33061	1.18520	0.18086	False
ACID BASE BALANCE NORMAL	15	1	1	53898	14	553310	0.73328	0.09642	5.57643	1.00000	False
ACIDOSIS	144	16	16	53883	128	553196	1.28324	0.76318	2.15769	0.37678	False
ACIDOSIS HYPERCHLORAEMIC	2	1	1	53898	1	553323	10.26594	0.64210	164.13287	0.16965	False
ACNE	510	67	67	53832	443	552881	1.55264	1.20104	2.00717	0.00134	True
ACOUSTIC NEUROMA	1	1	1	53898	0	553324	-100.00000	-100.00000	-100.00000	0.08876	False
ACOUSTIC STIMULATION TESTS	67	15	15	53884	52	553272	2.96133	1.66740	5.25937	0.00066	True
ACOUSTIC STIMULATION TESTS ABNORMAL	52	7	7	53892	45	553279	1.59692	0.72021	3.54089	0.22350	False
ACOUSTIC STIMULATION TESTS NORMAL	57	1	1	53898	56	553268	0.18332	0.02538	1.32430	0.06009	False
ACQUIRED DIAPHRAGMATIC EVENTRATION	2	1	1	53898	1	553323	10.26594	0.64210	164.13287	0.16965	False
ACQUIRED OESOPHAGEAL WEB	1	1	1	53898	0	553324	-100.00000	-100.00000	-100.00000	0.08876	False
ACQUIRED TRACHEO-OESOPHAGEAL FISTULA	1	1	1	53898	0	553324	-100.00000	-100.00000	-100.00000	0.08876	False
ACQUIRED VON WILLEBRAND'S DISEASE	1	1	1	53898	0	553324	-100.00000	-100.00000	-100.00000	0.08876	False
ACROCHORDON	7	2	2	53897	5	553319	4.10638	0.79669	21.16547	0.12257	False
ACRODERMATITIS CHRONICA ATROPHICANS	1	1	1	53898	0	553324	-100.00000	-100.00000	-100.00000	0.08876	False
ACTH STIMULATION TEST	2	1	1	53898	1	553323	10.26594	0.64210	164.13287	0.16965	False
ACTINIC KERATOSIS	2	1	1	53898	1	553323	10.26594	0.64210	164.13287	0.16965	False
ACTIVATED PARTIAL THROMBOPLASTIN TIME	90	13	13	53886	77	553247	1.73321	0.96304	3.11932	0.09083	False
ACTIVATED PARTIAL THROMBOPLASTIN TIME NORMAL	117	9	9	53890	108	553216	0.85550	0.43343	1.68856	0.87020	False
ACTIVATED PARTIAL THROMBOPLASTIN TIME PROLONGED	83	6	6	53893	77	553247	0.79994	0.34857	1.83583	0.84587	False
ACTIVATED PARTIAL THROMBOPLASTIN TIME SHORTENED	51	4	4	53895	47	553277	0.87370	0.31479	2.42490	1.00000	False
ACTIVITIES OF DAILY LIVING IMPAIRED	3456	543	543	53356	2913	550411	1.91363	1.74685	2.09634	0.00000	True
ACUPUNCTURE	55	4	4	53895	51	553273	0.80517	0.29102	2.22770	1.00000	False
ACUTE ABDOMEN	18	1	1	53898	17	553307	0.60388	0.08036	4.53771	1.00000	False
ACUTE CORONARY SYNDROME	8	2	2	53897	6	553318	3.42198	0.69067	16.95442	0.15415	False
ACUTE DISSEMINATED ENCEPHALOMYELITIS	302	16	16	53883	286	553038	0.57432	0.34714	0.95016	0.02574	True
ACUTE FEBRILE NEUTROPHILIC DERMATOSIS	27	6	6	53893	21	553303	2.93313	1.18389	7.26690	0.02839	True
ACUTE GRAFT VERSUS HOST DISEASE IN SKIN	1	1	1	53898	0	553324	-100.00000	-100.00000	-100.00000	0.08876	False
ACUTE HEPATIC FAILURE	23	2	2	53897	21	553303	0.97771	0.22925	4.16974	1.00000	False
ACUTE HEPATITIS B	7	1	1	53898	6	553318	1.71099	0.20599	14.21213	0.47830	False
ACUTE INTERSTITIAL PNEUMONITIS	1	1	1	53898	0	553324	-100.00000	-100.00000	-100.00000	0.08876	False
ACUTE KIDNEY INJURY	51	14	14	53885	37	553287	3.88441	2.10020	7.18438	0.00010	True
ACUTE LUNG INJURY	3	1	1	53898	2	553322	5.13297	0.46543	56.60902	0.24335	False
ACUTE LYMPHOCYTIC LEUKAEMIA	37	2	2	53897	35	553289	0.58663	0.14110	2.43898	0.76954	False
ACUTE MYELOID LEUKAEMIA	25	6	6	53893	19	553305	3.24188	1.29478	8.11703	0.01977	True
ACUTE MYOCARDIAL INFARCTION	32	1	1	53898	31	553293	0.33116	0.04521	2.42586	0.36011	False
ACUTE POLYNEUROPATHY	20	3	3	53896	17	553307	1.81164	0.53092	6.18173	0.41551	False
ACUTE PRERENAL FAILURE	2	1	1	53898	1	553323	10.26594	0.64210	164.13287	0.16965	False
ACUTE PROMYELOCYTIC LEUKAEMIA	3	1	1	53898	2	553322	5.13297	0.46543	56.60902	0.24335	False
ACUTE PULMONARY OEDEMA	7	3	3	53896	4	553320	7.69946	1.72323	34.40144	0.01862	True
ACUTE RESPIRATORY DISTRESS SYNDROME	80	14	14	53885	66	553258	2.17762	1.22334	3.87632	0.01559	True
ACUTE RESPIRATORY FAILURE	47	9	9	53890	38	553286	2.43141	1.17578	5.02794	0.03363	True
ACUTE SINUSITIS	29	9	9	53890	20	553304	4.61967	2.10361	10.14511	0.00066	True
ACUTE STRESS DISORDER	6	1	1	53898	5	553319	2.05319	0.23987	17.57448	0.42749	False
ACUTE TONSILLITIS	30	1	1	53898	29	553295	0.35400	0.04822	2.59873	0.51529	False
ACUTE VESTIBULAR SYNDROME	5	2	2	53897	3	553321	6.84396	1.14358	40.95901	0.06571	False
ADAMTS13 ACTIVITY DECREASED	2	2	2	53897	0	553324	-100.00000	-100.00000	-100.00000	0.00788	True
ADAMTS13 ACTIVITY INCREASED	2	1	1	53898	1	553323	10.26594	0.64210	164.13287	0.16965	False
ADDISON'S DISEASE	12	3	3	53896	9	553315	3.42198	0.92643	12.63987	0.08381	False
ADENOCARCINOMA	8	2	2	53897	6	553318	3.42198	0.69067	16.95442	0.15415	False
ADENOIDAL HYPERTROPHY	7	1	1	53898	6	553318	1.71099	0.20599	14.21213	0.47830	False
ADENOMA BENIGN	11	2	2	53897	9	553315	2.28132	0.49291	10.55850	0.25487	False
ADENOTONSILLECTOMY	8	1	1	53898	7	553317	1.46656	0.18043	11.92016	0.52461	False
ADENOVIRUS INFECTION	41	3	3	53896	38	553286	0.81047	0.25019	2.62545	1.00000	False
ADENOVIRUS TEST	203	7	7	53892	196	553128	0.36664	0.17252	0.77919	0.00416	True
ADENOVIRUS TEST POSITIVE	54	1	1	53898	53	553271	0.19370	0.02679	1.40063	0.08838	False
ADHESIOLYSIS	1	1	1	53898	0	553324	-100.00000	-100.00000	-100.00000	0.08876	False
ADJUSTMENT DISORDER WITH DEPRESSED MOOD	3	1	1	53898	2	553322	5.13297	0.46543	56.60902	0.24335	False
ADMINISTRATION RELATED REACTION	5	1	1	53898	4	553320	2.56649	0.28685	22.96259	0.37172	False
ADMINISTRATION SITE CELLULITIS	4	1	1	53898	3	553321	3.42198	0.35595	32.89811	0.31052	False
ADMINISTRATION SITE ERYTHEMA	3	1	1	53898	2	553322	5.13297	0.46543	56.60902	0.24335	False
ADMINISTRATION SITE INDURATION	5	1	1	53898	4	553320	2.56649	0.28685	22.96259	0.37172	False
ADMINISTRATION SITE NODULE	1	1	1	53898	0	553324	-100.00000	-100.00000	-100.00000	0.08876	False
ADMINISTRATION SITE ODOUR	2	1	1	53898	1	553323	10.26594	0.64210	164.13287	0.16965	False
ADMINISTRATION SITE PAIN	48	7	7	53892	41	553283	1.75272	0.78636	3.90665	0.19537	False
ADMINISTRATION SITE RASH	14	2	2	53897	12	553312	1.71099	0.38294	7.64476	0.35667	False
ADMINISTRATION SITE REACTION	14	1	1	53898	13	553311	0.78969	0.10330	6.03666	1.00000	False
ADMINISTRATION SITE SWELLING	31	8	8	53891	23	553301	3.57076	1.59732	7.98236	0.00471	True
ADMINISTRATION SITE VESICLES	1	1	1	53898	0	553324	-100.00000	-100.00000	-100.00000	0.08876	False
ADMINISTRATION SITE WARMTH	10	3	3	53896	7	553317	4.39969	1.13773	17.01395	0.05219	False
ADNEXA UTERI CYST	2	1	1	53898	1	553323	10.26594	0.64210	164.13287	0.16965	False
ADNEXA UTERI MASS	1	1	1	53898	0	553324	-100.00000	-100.00000	-100.00000	0.08876	False
ADNEXA UTERI PAIN	11	1	1	53898	10	553314	1.02659	0.13141	8.01964	1.00000	False
ADRENAL ADENOMA	2	2	2	53897	0	553324	-100.00000	-100.00000	-100.00000	0.00788	True
ADRENAL DISORDER	19	6	6	53893	13	553311	4.73813	1.80097	12.46539	0.00480	True
ADRENAL HAEMORRHAGE	11	3	3	53896	8	553316	3.84973	1.02133	14.51089	0.06715	False
ADRENAL INSUFFICIENCY	23	6	6	53893	17	553307	3.62327	1.42860	9.18947	0.01313	True
ADRENAL NEOPLASM	1	1	1	53898	0	553324	-100.00000	-100.00000	-100.00000	0.08876	False
ADRENOCORTICAL INSUFFICIENCY ACUTE	11	5	5	53894	6	553318	8.55495	2.61092	28.03115	0.00161	True
ADRENOCORTICAL INSUFFICIENCY CHRONIC	4	2	2	53897	2	553322	10.26594	1.44607	72.87982	0.04186	True
ADVERSE DRUG REACTION	145	30	30	53869	115	553209	2.67807	1.79208	4.00210	0.00001	True
ADVERSE EVENT	671	19	19	53880	652	552672	0.29916	0.18960	0.47204	0.00000	True
ADVERSE REACTION	515	33	33	53866	482	552842	0.70285	0.49402	0.99996	0.05214	False
AFFECT LABILITY	154	10	10	53889	144	553180	0.71291	0.37557	1.35325	0.39333	False
AFFECTIVE DISORDER	35	4	4	53895	31	553293	1.32464	0.46760	3.75245	0.54803	False
AGE-RELATED MACULAR DEGENERATION	2	1	1	53898	1	553323	10.26594	0.64210	164.13287	0.16965	False
AGEUSIA	188	39	39	53860	149	553175	2.68706	1.88894	3.82239	0.00000	True
AGGRESSION	523	34	34	53865	489	552835	0.71379	0.50425	1.01040	0.05455	False
AGITATION	10221	409	409	53490	9812	543512	0.42792	0.38777	0.47223	0.00000	True
AGITATION NEONATAL	5	1	1	53898	4	553320	2.56649	0.28685	22.96259	0.37172	False
AGRANULOCYTOSIS	22	3	3	53896	19	553305	1.62094	0.47968	5.47747	0.43912	False
AKATHISIA	23	2	2	53897	21	553303	0.97771	0.22925	4.16974	1.00000	False
AKINESIA	25	8	8	53891	17	553307	4.83103	2.08499	11.19376	0.00104	True
ALANINE AMINOTRANSFERASE	62	9	9	53890	53	553271	1.74327	0.86001	3.53368	0.11808	False
ALANINE AMINOTRANSFERASE ABNORMAL	7	3	3	53896	4	553320	7.69946	1.72323	34.40144	0.01862	True
ALANINE AMINOTRANSFERASE DECREASED	21	1	1	53898	20	553304	0.51330	0.06889	3.82471	1.00000	False
ALANINE AMINOTRANSFERASE INCREASED	1486	190	190	53709	1296	552028	1.50504	1.29281	1.75211	0.00000	True
ALANINE AMINOTRANSFERASE NORMAL	405	43	43	53856	362	552962	1.21944	0.88902	1.67266	0.22053	False
ALBUMIN CSF ABNORMAL	7	1	1	53898	6	553318	1.71099	0.20599	14.21213	0.47830	False
ALBUMIN CSF DECREASED	4	2	2	53897	2	553322	10.26594	1.44607	72.87982	0.04186	True
ALBUMIN CSF INCREASED	42	5	5	53894	37	553287	1.38729	0.54526	3.52965	0.41818	False
ALBUMIN CSF NORMAL	9	1	1	53898	8	553316	1.28324	0.16050	10.26013	0.56681	False
ALBUMIN GLOBULIN RATIO	27	3	3	53896	24	553300	1.28324	0.38642	4.26144	0.72925	False
ALBUMIN GLOBULIN RATIO ABNORMAL	12	2	2	53897	10	553314	2.05319	0.44987	9.37060	0.28908	False
ALBUMIN GLOBULIN RATIO NORMAL	18	1	1	53898	17	553307	0.60388	0.08036	4.53771	1.00000	False
ALBUMIN URINE PRESENT	18	4	4	53895	14	553310	2.93313	0.96550	8.91067	0.06935	False
ALBUMINURIA	81	8	8	53891	73	553251	1.12503	0.54222	2.33429	0.69560	False
ALCOHOL POISONING	11	2	2	53897	9	553315	2.28132	0.49291	10.55850	0.25487	False
ALCOHOLISM	1	1	1	53898	0	553324	-100.00000	-100.00000	-100.00000	0.08876	False
ALDOLASE	10	2	2	53897	8	553316	2.56649	0.54501	12.08576	0.22074	False
ALDOLASE DECREASED	1	1	1	53898	0	553324	-100.00000	-100.00000	-100.00000	0.08876	False
ALDOLASE INCREASED	15	2	2	53897	13	553311	1.57938	0.35641	6.99874	0.38961	False
ALDOLASE NORMAL	20	3	3	53896	17	553307	1.81164	0.53092	6.18173	0.41551	False
ALKALOSIS	12	3	3	53896	9	553315	3.42198	0.92643	12.63987	0.08381	False
ALLERGIC GRANULOMATOUS ANGIITIS	12	5	5	53894	7	553317	7.33282	2.32736	23.10350	0.00256	True
ALLERGIC OEDEMA	9	2	2	53897	7	553317	2.93313	0.60933	14.11926	0.18703	False
ALLERGIC RESPIRATORY SYMPTOM	7	1	1	53898	6	553318	1.71099	0.20599	14.21213	0.47830	False
ALLERGIC SINUSITIS	2	2	2	53897	0	553324	-100.00000	-100.00000	-100.00000	0.00788	True
ALLERGY TEST	299	33	33	53866	266	553058	1.27359	0.88711	1.82846	0.18596	False
ALLERGY TEST NEGATIVE	179	23	23	53876	156	553168	1.51357	0.97705	2.34471	0.06566	False
ALLERGY TEST POSITIVE	181	14	14	53885	167	553157	0.86062	0.49888	1.48464	0.69503	False
ALLERGY TO ANIMAL	26	1	1	53898	25	553299	0.41064	0.05564	3.03057	0.72489	False
ALLERGY TO ARTHROPOD BITE	3	2	2	53897	1	553323	20.53188	1.86171	226.43607	0.02224	True
ALLERGY TO ARTHROPOD STING	5	1	1	53898	4	553320	2.56649	0.28685	22.96259	0.37172	False
ALLERGY TO METALS	178	5	5	53894	173	553151	0.29670	0.12196	0.72184	0.00217	True
ALLERGY TO PLANTS	9	1	1	53898	8	553316	1.28324	0.16050	10.26013	0.56681	False
ALLERGY TO VACCINE	427	44	44	53855	383	552941	1.17938	0.86340	1.61100	0.30630	False
ALLODYNIA	42	6	6	53893	36	553288	1.71099	0.72097	4.06050	0.26777	False
ALOPECIA	1083	89	89	53810	994	552330	0.91918	0.74011	1.14158	0.48682	False
ALOPECIA AREATA	67	6	6	53893	61	553263	1.00976	0.43656	2.33560	1.00000	False
ALOPECIA TOTALIS	10	2	2	53897	8	553316	2.56649	0.54501	12.08576	0.22074	False
ALPHA-1 ACID GLYCOPROTEIN NORMAL	2	1	1	53898	1	553323	10.26594	0.64210	164.13287	0.16965	False
ALPHA-1 ANTI-TRYPSIN DECREASED	2	2	2	53897	0	553324	-100.00000	-100.00000	-100.00000	0.00788	True
ALPHA 1 FOETOPROTEIN	28	1	1	53898	27	553297	0.38022	0.05167	2.79810	0.51001	False
ALPHA 1 FOETOPROTEIN ABNORMAL	9	1	1	53898	8	553316	1.28324	0.16050	10.26013	0.56681	False
ALPHA 1 FOETOPROTEIN AMNIOTIC FLUID NORMAL	12	2	2	53897	10	553314	2.05319	0.44987	9.37060	0.28908	False
ALPHA 1 FOETOPROTEIN INCREASED	10	1	1	53898	9	553315	1.14066	0.14451	9.00347	0.60526	False
ALPHA 1 FOETOPROTEIN NORMAL	130	19	19	53880	111	553213	1.75723	1.08026	2.85845	0.02942	True
ALPHA 1 GLOBULIN	4	1	1	53898	3	553321	3.42198	0.35595	32.89811	0.31052	False
ALPHA 1 GLOBULIN INCREASED	12	3	3	53896	9	553315	3.42198	0.92643	12.63987	0.08381	False
ALPHA 2 GLOBULIN	9	1	1	53898	8	553316	1.28324	0.16050	10.26013	0.56681	False
ALPHA 2 GLOBULIN INCREASED	18	6	6	53893	12	553312	5.13297	1.92654	13.67603	0.00355	True
ALTERED STATE OF CONSCIOUSNESS	405	29	29	53870	376	552948	0.79179	0.54276	1.15508	0.25551	False
ALTERED VISUAL DEPTH PERCEPTION	16	2	2	53897	14	553310	1.46656	0.33331	6.45281	0.64777	False
ALVEOLAR OSTEITIS	1	1	1	53898	0	553324	-100.00000	-100.00000	-100.00000	0.08876	False
ALVEOLITIS	10	1	1	53898	9	553315	1.14066	0.14451	9.00347	0.60526	False
ALVEOLITIS ALLERGIC	13	5	5	53894	8	553316	6.41621	2.09906	19.61246	0.00385	True
ALVEOLITIS FIBROSING	5	1	1	53898	4	553320	2.56649	0.28685	22.96259	0.37172	False
AMAUROSIS	7	1	1	53898	6	553318	1.71099	0.20599	14.21213	0.47830	False
AMBLYOPIA	442	29	29	53870	413	552911	0.72085	0.49473	1.05033	0.09383	False
AMENORRHOEA	282	7	7	53892	275	553049	0.26131	0.12342	0.55327	0.00002	True
AMIMIA	1	1	1	53898	0	553324	-100.00000	-100.00000	-100.00000	0.08876	False
AMINO ACID LEVEL	15	1	1	53898	14	553310	0.73328	0.09642	5.57643	1.00000	False
AMINO ACID LEVEL INCREASED	6	2	2	53897	4	553320	5.13297	0.94016	28.02428	0.09287	False
AMINO ACID LEVEL NORMAL	31	1	1	53898	30	553294	0.34220	0.04667	2.50932	0.51983	False
AMINOACIDURIA	1	1	1	53898	0	553324	-100.00000	-100.00000	-100.00000	0.08876	False
AMMONIA	13	2	2	53897	11	553313	1.86653	0.41372	8.42094	0.32309	False
AMMONIA INCREASED	30	1	1	53898	29	553295	0.35400	0.04822	2.59873	0.51529	False
AMNESIA	1074	129	129	53770	945	552379	1.40138	1.16614	1.68408	0.00057	True
AMNIOCENTESIS ABNORMAL	7	1	1	53898	6	553318	1.71099	0.20599	14.21213	0.47830	False
AMNIOCENTESIS NORMAL	18	2	2	53897	16	553308	1.28324	0.29506	5.58098	0.67097	False
AMNIOTIC CAVITY INFECTION	19	1	1	53898	18	553306	0.57033	0.07614	4.27229	1.00000	False
AMNIOTIC FLUID INDEX ABNORMAL	3	1	1	53898	2	553322	5.13297	0.46543	56.60902	0.24335	False
AMYLASE	18	3	3	53896	15	553309	2.05319	0.59441	7.09206	0.21088	False
AMYLASE INCREASED	27	6	6	53893	21	553303	2.93313	1.18389	7.26690	0.02839	True
AMYLASE NORMAL	23	5	5	53894	18	553306	2.85165	1.05877	7.68052	0.04792	True
AMYLOIDOSIS	2	1	1	53898	1	553323	10.26594	0.64210	164.13287	0.16965	False
AMYOTROPHIC LATERAL SCLEROSIS	32	2	2	53897	30	553294	0.68440	0.16356	2.86376	1.00000	False
AMYOTROPHY	14	1	1	53898	13	553311	0.78969	0.10330	6.03666	1.00000	False
ANAEMIA	1150	134	134	53765	1016	552308	1.35397	1.13102	1.62087	0.00151	True
ANAEMIA HAEMOLYTIC AUTOIMMUNE	39	5	5	53894	34	553290	1.50970	0.59047	3.85992	0.39025	False
ANAEMIA MACROCYTIC	8	2	2	53897	6	553318	3.42198	0.69067	16.95442	0.15415	False
ANAEMIA OF PREGNANCY	7	1	1	53898	6	553318	1.71099	0.20599	14.21213	0.47830	False
ANAEMIA POSTOPERATIVE	1	1	1	53898	0	553324	-100.00000	-100.00000	-100.00000	0.08876	False
ANAEMIA VITAMIN B12 DEFICIENCY	2	1	1	53898	1	553323	10.26594	0.64210	164.13287	0.16965	False
ANAL FISSURE	34	2	2	53897	32	553292	0.64162	0.15377	2.67727	0.76543	False
ANAL FISTULA	2	1	1	53898	1	553323	10.26594	0.64210	164.13287	0.16965	False
ANAL INCONTINENCE	25	5	5	53894	20	553304	2.56649	0.96327	6.83802	0.06539	False
ANAL PRURITUS	7	1	1	53898	6	553318	1.71099	0.20599	14.21213	0.47830	False
ANALGESIC DRUG LEVEL DECREASED	2	1	1	53898	1	553323	10.26594	0.64210	164.13287	0.16965	False
ANALGESIC DRUG LEVEL THERAPEUTIC	7	1	1	53898	6	553318	1.71099	0.20599	14.21213	0.47830	False
ANAPHYLACTIC REACTION	1840	131	131	53768	1709	551615	0.78692	0.65895	0.93973	0.00756	True
ANAPHYLACTIC SHOCK	324	30	30	53869	294	553030	1.04755	0.71957	1.52502	0.76957	False
ANAPHYLACTOID REACTION	443	33	33	53866	410	552914	0.82628	0.57963	1.17790	0.31650	False
ANAPLASTIC LARGE CELL LYMPHOMA T- AND NULL-CELL TYPES	2	1	1	53898	1	553323	10.26594	0.64210	164.13287	0.16965	False
ANAPLASTIC LYMPHOMA KINASE GENE MUTATION	1	1	1	53898	0	553324	-100.00000	-100.00000	-100.00000	0.08876	False
ANENCEPHALY	4	1	1	53898	3	553321	3.42198	0.35595	32.89811	0.31052	False
ANEURYSM	21	3	3	53896	18	553306	1.71099	0.50400	5.80846	0.42661	False
ANGER	203	21	21	53878	182	553142	1.18453	0.75407	1.86073	0.45785	False
ANGINA PECTORIS	140	25	25	53874	115	553209	2.23173	1.44824	3.43907	0.00083	True
ANGIOEDEMA	669	87	87	53812	582	552742	1.53460	1.22526	1.92204	0.00038	True
ANGIOGRAM	129	27	27	53872	102	553222	2.71746	1.77818	4.15288	0.00003	True
ANGIOGRAM ABNORMAL	32	7	7	53892	25	553299	2.87446	1.24332	6.64557	0.02010	True
ANGIOGRAM CEREBRAL	5	2	2	53897	3	553321	6.84396	1.14358	40.95901	0.06571	False
ANGIOGRAM CEREBRAL ABNORMAL	5	1	1	53898	4	553320	2.56649	0.28685	22.96259	0.37172	False
ANGIOGRAM CEREBRAL NORMAL	8	1	1	53898	7	553317	1.46656	0.18043	11.92016	0.52461	False
ANGIOGRAM NORMAL	64	14	14	53885	50	553274	2.87446	1.58928	5.19891	0.00126	True
ANGIOGRAM PULMONARY ABNORMAL	5	1	1	53898	4	553320	2.56649	0.28685	22.96259	0.37172	False
ANGIOGRAM RETINA	3	1	1	53898	2	553322	5.13297	0.46543	56.60902	0.24335	False
ANGIOMYOLIPOMA	2	2	2	53897	0	553324	-100.00000	-100.00000	-100.00000	0.00788	True
ANGIONEUROTIC OEDEMA	490	47	47	53852	443	552881	1.08916	0.80643	1.47102	0.57764	False
ANGIOPATHY	103	11	11	53888	92	553232	1.22745	0.65685	2.29371	0.48754	False
ANGIOPLASTY	7	4	4	53895	3	553321	13.68792	3.06352	61.15811	0.00174	True
ANGIOSCOPY	5	1	1	53898	4	553320	2.56649	0.28685	22.96259	0.37172	False
ANGIOTENSIN CONVERTING ENZYME	61	11	11	53888	50	553274	2.25851	1.17589	4.33787	0.02100	True
ANGIOTENSIN CONVERTING ENZYME DECREASED	9	1	1	53898	8	553316	1.28324	0.16050	10.26013	0.56681	False
ANGIOTENSIN CONVERTING ENZYME INCREASED	16	1	1	53898	15	553309	0.68440	0.09040	5.18123	1.00000	False
ANGLE CLOSURE GLAUCOMA	1	1	1	53898	0	553324	-100.00000	-100.00000	-100.00000	0.08876	False
ANIMAL BITE	14	1	1	53898	13	553311	0.78969	0.10330	6.03666	1.00000	False
ANIMAL SCRATCH	3	1	1	53898	2	553322	5.13297	0.46543	56.60902	0.24335	False
ANION GAP	32	11	11	53888	21	553303	5.37740	2.59285	11.15235	0.00006	True
ANION GAP DECREASED	20	6	6	53893	14	553310	4.39969	1.69078	11.44869	0.00635	True
ANION GAP INCREASED	28	4	4	53895	24	553300	1.71099	0.59368	4.93107	0.30797	False
ANION GAP NORMAL	38	10	10	53889	28	553296	3.66641	1.78107	7.54746	0.00140	True
ANISOCYTOSIS	12	1	1	53898	11	553313	0.93327	0.12049	7.22878	1.00000	False
ANISOMETROPIA	4	1	1	53898	3	553321	3.42198	0.35595	32.89811	0.31052	False
ANKLE FRACTURE	11	5	5	53894	6	553318	8.55495	2.61092	28.03115	0.00161	True
ANKYLOSING SPONDYLITIS	33	4	4	53895	29	553295	1.41599	0.49781	4.02770	0.53212	False
ANOGENITAL WARTS	170	7	7	53892	163	553161	0.44087	0.20690	0.93940	0.02956	True
ANOMALY OF EXTERNAL EAR CONGENITAL	1	1	1	53898	0	553324	-100.00000	-100.00000	-100.00000	0.08876	False
ANORECTAL DISCOMFORT	7	1	1	53898	6	553318	1.71099	0.20599	14.21213	0.47830	False
ANORECTAL DISORDER	47	5	5	53894	42	553282	1.22214	0.48355	3.08887	0.60673	False
ANOREXIA	4257	274	274	53625	3983	549341	0.70622	0.62505	0.79793	0.00000	True
ANOSMIA	71	20	20	53879	51	553273	4.02586	2.40056	6.75157	0.00000	True
ANOXIA	7	1	1	53898	6	553318	1.71099	0.20599	14.21213	0.47830	False
ANTEPARTUM HAEMORRHAGE	12	1	1	53898	11	553313	0.93327	0.12049	7.22878	1.00000	False
ANTI-ACTIN ANTIBODY POSITIVE	1	1	1	53898	0	553324	-100.00000	-100.00000	-100.00000	0.08876	False
ANTI-AQUAPORIN-4 ANTIBODY NEGATIVE	18	1	1	53898	17	553307	0.60388	0.08036	4.53771	1.00000	False
ANTI-AQUAPORIN-4 ANTIBODY POSITIVE	4	1	1	53898	3	553321	3.42198	0.35595	32.89811	0.31052	False
ANTI-CYCLIC CITRULLINATED PEPTIDE ANTIBODY	11	1	1	53898	10	553314	1.02659	0.13141	8.01964	1.00000	False
ANTI-CYCLIC CITRULLINATED PEPTIDE ANTIBODY NEGATIVE	50	9	9	53890	41	553283	2.25350	1.09533	4.63630	0.03996	True
ANTI-CYCLIC CITRULLINATED PEPTIDE ANTIBODY POSITIVE	34	7	7	53892	27	553297	2.66154	1.15909	6.11149	0.02752	True
ANTI-GANGLIOSIDE ANTIBODY	10	3	3	53896	7	553317	4.39969	1.13773	17.01395	0.05219	False
ANTI-GANGLIOSIDE ANTIBODY POSITIVE	11	1	1	53898	10	553314	1.02659	0.13141	8.01964	1.00000	False
ANTI-GLOMERULAR BASEMENT MEMBRANE ANTIBODY	4	2	2	53897	2	553322	10.26594	1.44607	72.87982	0.04186	True
ANTI-GLOMERULAR BASEMENT MEMBRANE ANTIBODY NEGATIVE	7	4	4	53895	3	553321	13.68792	3.06352	61.15811	0.00174	True
ANTI-HBC ANTIBODY NEGATIVE	18	2	2	53897	16	553308	1.28324	0.29506	5.58098	0.67097	False
ANTI-HBC IGM ANTIBODY POSITIVE	9	1	1	53898	8	553316	1.28324	0.16050	10.26013	0.56681	False
ANTI-HBE ANTIBODY NEGATIVE	3	1	1	53898	2	553322	5.13297	0.46543	56.60902	0.24335	False
ANTI-HBS ANTIBODY NEGATIVE	77	4	4	53895	73	553251	0.56252	0.20561	1.53898	0.31909	False
ANTI-HBS ANTIBODY POSITIVE	40	1	1	53898	39	553285	0.26323	0.03616	1.91596	0.25866	False
ANTI-JC VIRUS ANTIBODY INDEX	1	1	1	53898	0	553324	-100.00000	-100.00000	-100.00000	0.08876	False
ANTI-MYELIN-ASSOCIATED GLYCOPROTEIN ANTIBODIES POSITIVE	1	1	1	53898	0	553324	-100.00000	-100.00000	-100.00000	0.08876	False
ANTI-NEURONAL ANTIBODY	11	1	1	53898	10	553314	1.02659	0.13141	8.01964	1.00000	False
ANTI-NEURONAL ANTIBODY NEGATIVE	13	2	2	53897	11	553313	1.86653	0.41372	8.42094	0.32309	False
ANTI-NEUTROPHIL CYTOPLASMIC ANTIBODY POSITIVE VASCULITIS	15	3	3	53896	12	553312	2.56649	0.72426	9.09460	0.14252	False
ANTI-PLATELET ANTIBODY	3	1	1	53898	2	553322	5.13297	0.46543	56.60902	0.24335	False
ANTI-PLATELET ANTIBODY NEGATIVE	9	1	1	53898	8	553316	1.28324	0.16050	10.26013	0.56681	False
ANTI-PLATELET ANTIBODY POSITIVE	9	1	1	53898	8	553316	1.28324	0.16050	10.26013	0.56681	False
ANTI-SS-A ANTIBODY NEGATIVE	13	3	3	53896	10	553314	3.07978	0.84760	11.19043	0.10203	False
ANTI-SS-A ANTIBODY POSITIVE	16	3	3	53896	13	553311	2.36906	0.67511	8.31340	0.16445	False
ANTI-SS-B ANTIBODY NEGATIVE	13	3	3	53896	10	553314	3.07978	0.84760	11.19043	0.10203	False
ANTI-SS-B ANTIBODY POSITIVE	11	3	3	53896	8	553316	3.84973	1.02133	14.51089	0.06715	False
ANTI-THYROID ANTIBODY	26	5	5	53894	21	553303	2.44427	0.92170	6.48200	0.07528	False
ANTI-THYROID ANTIBODY NEGATIVE	40	5	5	53894	35	553289	1.46656	0.57459	3.74319	0.39878	False
ANTI-THYROID ANTIBODY POSITIVE	60	3	3	53896	57	553267	0.54031	0.16922	1.72523	0.36925	False
ANTI-TRANSGLUTAMINASE ANTIBODY	5	1	1	53898	4	553320	2.56649	0.28685	22.96259	0.37172	False
ANTI-TRANSGLUTAMINASE ANTIBODY NEGATIVE	13	2	2	53897	11	553313	1.86653	0.41372	8.42094	0.32309	False
ANTI-VGCC ANTIBODY	1	1	1	53898	0	553324	-100.00000	-100.00000	-100.00000	0.08876	False
ANTI-VGKC ANTIBODY POSITIVE	3	1	1	53898	2	553322	5.13297	0.46543	56.60902	0.24335	False
ANTIACETYLCHOLINE RECEPTOR ANTIBODY	18	3	3	53896	15	553309	2.05319	0.59441	7.09206	0.21088	False
ANTIACETYLCHOLINE RECEPTOR ANTIBODY POSITIVE	16	2	2	53897	14	553310	1.46656	0.33331	6.45281	0.64777	False
ANTIBIOTIC RESISTANT STAPHYLOCOCCUS TEST NEGATIVE	17	1	1	53898	16	553308	0.64162	0.08509	4.83821	1.00000	False
ANTIBIOTIC RESISTANT STAPHYLOCOCCUS TEST POSITIVE	10	1	1	53898	9	553315	1.14066	0.14451	9.00347	0.60526	False
ANTIBODY TEST	157	17	17	53882	140	553184	1.24658	0.75358	2.06211	0.39778	False
ANTIBODY TEST ABNORMAL	144	10	10	53889	134	553190	0.76612	0.40298	1.45650	0.55607	False
ANTIBODY TEST NEGATIVE	889	69	69	53830	820	552504	0.86384	0.67578	1.10424	0.26213	False
ANTIBODY TEST NORMAL	36	5	5	53894	31	553293	1.65580	0.64387	4.25812	0.24684	False
ANTIBODY TEST POSITIVE	157	11	11	53888	146	553178	0.77346	0.41910	1.42743	0.48385	False
ANTICOAGULANT THERAPY	10	1	1	53898	9	553315	1.14066	0.14451	9.00347	0.60526	False
ANTICOAGULATION DRUG LEVEL BELOW THERAPEUTIC	2	1	1	53898	1	553323	10.26594	0.64210	164.13287	0.16965	False
ANTICONVULSANT DRUG LEVEL	15	5	5	53894	10	553314	5.13297	1.75450	15.01702	0.00774	True
ANTICONVULSANT DRUG LEVEL ABNORMAL	1	1	1	53898	0	553324	-100.00000	-100.00000	-100.00000	0.08876	False
ANTICONVULSANT DRUG LEVEL BELOW THERAPEUTIC	4	1	1	53898	3	553321	3.42198	0.35595	32.89811	0.31052	False
ANTICONVULSANT DRUG LEVEL DECREASED	3	1	1	53898	2	553322	5.13297	0.46543	56.60902	0.24335	False
ANTICONVULSANT DRUG LEVEL THERAPEUTIC	10	5	5	53894	5	553319	10.26594	2.97205	35.46028	0.00095	True
ANTIDIURETIC HORMONE ABNORMALITY	3	1	1	53898	2	553322	5.13297	0.46543	56.60902	0.24335	False
ANTIGLIADIN ANTIBODY POSITIVE	10	1	1	53898	9	553315	1.14066	0.14451	9.00347	0.60526	False
ANTIMICROBIAL SUSCEPTIBILITY TEST	19	3	3	53896	16	553308	1.92486	0.56088	6.60590	0.23506	False
ANTIMICROBIAL SUSCEPTIBILITY TEST SENSITIVE	9	1	1	53898	8	553316	1.28324	0.16050	10.26013	0.56681	False
ANTIMITOCHONDRIAL ANTIBODY	3	1	1	53898	2	553322	5.13297	0.46543	56.60902	0.24335	False
ANTIMITOCHONDRIAL ANTIBODY NORMAL	22	3	3	53896	19	553305	1.62094	0.47968	5.47747	0.43912	False
ANTINEUTROPHIL CYTOPLASMIC ANTIBODY	23	10	10	53889	13	553311	7.89688	3.46286	18.00843	0.00001	True
ANTINEUTROPHIL CYTOPLASMIC ANTIBODY DECREASED	1	1	1	53898	0	553324	-100.00000	-100.00000	-100.00000	0.08876	False
ANTINEUTROPHIL CYTOPLASMIC ANTIBODY INCREASED	9	1	1	53898	8	553316	1.28324	0.16050	10.26013	0.56681	False
ANTINEUTROPHIL CYTOPLASMIC ANTIBODY NEGATIVE	159	30	30	53869	129	553195	2.38743	1.60485	3.55161	0.00007	True
ANTINEUTROPHIL CYTOPLASMIC ANTIBODY POSITIVE	56	9	9	53890	47	553277	1.96582	0.96350	4.01085	0.09265	False
ANTINUCLEAR ANTIBODY	479	67	67	53832	412	552912	1.66946	1.28977	2.16093	0.00027	True
ANTINUCLEAR ANTIBODY INCREASED	79	13	13	53886	66	553258	2.02208	1.11567	3.66489	0.02709	True
ANTINUCLEAR ANTIBODY NEGATIVE	654	97	97	53802	557	552767	1.78779	1.44126	2.21763	0.00000	True
ANTINUCLEAR ANTIBODY POSITIVE	429	65	65	53834	364	552960	1.83320	1.40817	2.38653	0.00003	True
ANTIPHOSPHOLIPID ANTIBODIES	17	3	3	53896	14	553310	2.19984	0.63220	7.65474	0.18729	False
ANTIPHOSPHOLIPID ANTIBODIES NEGATIVE	54	3	3	53896	51	553273	0.60388	0.18848	1.93479	0.62854	False
ANTIPHOSPHOLIPID ANTIBODIES POSITIVE	30	4	4	53895	26	553298	1.57938	0.55122	4.52529	0.33555	False
ANTIPHOSPHOLIPID SYNDROME	21	2	2	53897	19	553305	1.08063	0.25171	4.63929	0.70955	False
ANTIPSYCHOTIC DRUG LEVEL	2	2	2	53897	0	553324	-100.00000	-100.00000	-100.00000	0.00788	True
ANTISOCIAL BEHAVIOUR	321	8	8	53891	313	553011	0.26239	0.13008	0.52929	0.00001	True
ANTITHROMBIN III	17	1	1	53898	16	553308	0.64162	0.08509	4.83821	1.00000	False
ANURIA	51	8	8	53891	43	553281	1.90994	0.89803	4.06210	0.13128	False
ANXIETY	2506	292	292	53607	2214	551110	1.35395	1.19880	1.52919	0.00000	True
ANXIETY DISORDER	22	2	2	53897	20	553304	1.02659	0.23996	4.39204	1.00000	False
AORTIC ANEURYSM	8	2	2	53897	6	553318	3.42198	0.69067	16.95442	0.15415	False
AORTIC ARTERIOSCLEROSIS	9	4	4	53895	5	553319	8.21275	2.20540	30.58368	0.00542	True
AORTIC STENOSIS	8	2	2	53897	6	553318	3.42198	0.69067	16.95442	0.15415	False
AORTIC VALVE DISEASE	2	1	1	53898	1	553323	10.26594	0.64210	164.13287	0.16965	False
AORTIC VALVE INCOMPETENCE	13	6	6	53893	7	553317	8.79938	2.95729	26.18243	0.00048	True
AORTIC VALVE REPLACEMENT	1	1	1	53898	0	553324	-100.00000	-100.00000	-100.00000	0.08876	False
AORTIC VALVE STENOSIS	12	3	3	53896	9	553315	3.42198	0.92643	12.63987	0.08381	False
AORTITIS	2	1	1	53898	1	553323	10.26594	0.64210	164.13287	0.16965	False
APALLIC SYNDROME	8	1	1	53898	7	553317	1.46656	0.18043	11.92016	0.52461	False
APATHY	437	17	17	53882	420	552904	0.41553	0.25589	0.67476	0.00007	True
APGAR SCORE	4	1	1	53898	3	553321	3.42198	0.35595	32.89811	0.31052	False
APGAR SCORE ABNORMAL	15	2	2	53897	13	553311	1.57938	0.35641	6.99874	0.38961	False
APGAR SCORE NORMAL	83	8	8	53891	75	553249	1.09503	0.52827	2.26986	0.70203	False
APHAGIA	130	22	22	53877	108	553216	2.09121	1.32229	3.30726	0.00299	True
APHASIA	1017	83	83	53816	934	552390	0.91228	0.72897	1.14170	0.47291	False
APHONIA	178	34	34	53865	144	553180	2.42390	1.66823	3.52188	0.00003	True
APHTHOUS STOMATITIS	155	8	8	53891	147	553177	0.55869	0.27426	1.13810	0.11919	False
APHTHOUS ULCER	12	2	2	53897	10	553314	2.05319	0.44987	9.37060	0.28908	False
APLASIA CUTIS CONGENITA	2	1	1	53898	1	553323	10.26594	0.64210	164.13287	0.16965	False
APLASTIC ANAEMIA	83	5	5	53894	78	553246	0.65807	0.26644	1.62534	0.44363	False
APNOEA	2995	223	223	53676	2772	550552	0.82587	0.72075	0.94632	0.00507	True
APNOEA NEONATAL	8	1	1	53898	7	553317	1.46656	0.18043	11.92016	0.52461	False
APNOEA TEST	8	1	1	53898	7	553317	1.46656	0.18043	11.92016	0.52461	False
APNOEIC ATTACK	66	8	8	53891	58	553266	1.41599	0.67616	2.96533	0.38115	False
APOLIPOPROTEIN C	1	1	1	53898	0	553324	-100.00000	-100.00000	-100.00000	0.08876	False
APPARENT DEATH	26	3	3	53896	23	553301	1.33904	0.40206	4.45962	0.49895	False
APPARENT LIFE THREATENING EVENT	145	9	9	53890	136	553188	0.67936	0.34606	1.33369	0.30730	False
APPENDICECTOMY	173	9	9	53890	164	553160	0.56337	0.28801	1.10203	0.10684	False
APPENDICITIS	92	2	2	53897	90	553234	0.22813	0.05619	0.92625	0.01646	True
APPETITE DISORDER	60	7	7	53892	53	553271	1.35588	0.61649	2.98206	0.49085	False
APPLICATION SITE ERYTHEMA	33	2	2	53897	31	553293	0.66232	0.15851	2.76738	0.76529	False
APPLICATION SITE HYPERAESTHESIA	2	1	1	53898	1	553323	10.26594	0.64210	164.13287	0.16965	False
APPLICATION SITE OEDEMA	29	2	2	53897	27	553297	0.76044	0.18083	3.19778	1.00000	False
APPLICATION SITE PAIN	23	1	1	53898	22	553302	0.46663	0.06290	3.46191	0.71696	False
APPLICATION SITE PAPULES	1	1	1	53898	0	553324	-100.00000	-100.00000	-100.00000	0.08876	False
APPLICATION SITE REACTION	40	7	7	53892	33	553291	2.17762	0.96336	4.92238	0.08445	False
APPLICATION SITE VESICLES	5	2	2	53897	3	553321	6.84396	1.14358	40.95901	0.06571	False
APRAXIA	48	3	3	53896	45	553279	0.68440	0.21269	2.20222	0.79778	False
APTYALISM	7	3	3	53896	4	553320	7.69946	1.72323	34.40144	0.01862	True
ARACHNOIDITIS	5	1	1	53898	4	553320	2.56649	0.28685	22.96259	0.37172	False
AREFLEXIA	320	50	50	53849	270	553054	1.90110	1.40607	2.57041	0.00010	True
ARGININOSUCCINATE SYNTHETASE DEFICIENCY	1	1	1	53898	0	553324	-100.00000	-100.00000	-100.00000	0.08876	False
ARRESTED LABOUR	19	1	1	53898	18	553306	0.57033	0.07614	4.27229	1.00000	False
ARRHYTHMIA	431	67	67	53832	364	552960	1.88961	1.45639	2.45170	0.00001	True
ARRHYTHMIA SUPRAVENTRICULAR	8	2	2	53897	6	553318	3.42198	0.69067	16.95442	0.15415	False
ARTERIAL DISORDER	4	1	1	53898	3	553321	3.42198	0.35595	32.89811	0.31052	False
ARTERIAL HAEMORRHAGE	1	1	1	53898	0	553324	-100.00000	-100.00000	-100.00000	0.08876	False
ARTERIAL INJURY	3	1	1	53898	2	553322	5.13297	0.46543	56.60902	0.24335	False
ARTERIAL OCCLUSIVE DISEASE	3	1	1	53898	2	553322	5.13297	0.46543	56.60902	0.24335	False
ARTERIAL SPASM	2	1	1	53898	1	553323	10.26594	0.64210	164.13287	0.16965	False
ARTERIAL THROMBOSIS	5	2	2	53897	3	553321	6.84396	1.14358	40.95901	0.06571	False
ARTERIOGRAM ABNORMAL	1	1	1	53898	0	553324	-100.00000	-100.00000	-100.00000	0.08876	False
ARTERIOGRAM CAROTID	4	2	2	53897	2	553322	10.26594	1.44607	72.87982	0.04186	True
ARTERIOGRAM CAROTID ABNORMAL	2	1	1	53898	1	553323	10.26594	0.64210	164.13287	0.16965	False
ARTERIOGRAM CAROTID NORMAL	10	3	3	53896	7	553317	4.39969	1.13773	17.01395	0.05219	False
ARTERIOGRAM CORONARY NORMAL	17	3	3	53896	14	553310	2.19984	0.63220	7.65474	0.18729	False
ARTERIOSCLEROSIS	42	10	10	53889	32	553292	3.20811	1.57721	6.52541	0.00314	True
ARTERIOSCLEROSIS CORONARY ARTERY	3	1	1	53898	2	553322	5.13297	0.46543	56.60902	0.24335	False
ARTERIOVENOUS FISTULA	1	1	1	53898	0	553324	-100.00000	-100.00000	-100.00000	0.08876	False
ARTERITIS	48	7	7	53892	41	553283	1.75272	0.78636	3.90665	0.19537	False
ARTERITIS CORONARY	1	1	1	53898	0	553324	-100.00000	-100.00000	-100.00000	0.08876	False
ARTHRALGIA	17114	2544	2544	51355	14570	538754	1.79249	1.72018	1.86784	0.00000	True
ARTHRITIS	2046	265	265	53634	1781	551543	1.52750	1.34297	1.73738	0.00000	True
ARTHRITIS ALLERGIC	5	2	2	53897	3	553321	6.84396	1.14358	40.95901	0.06571	False
ARTHRITIS BACTERIAL	78	7	7	53892	71	553253	1.01214	0.46563	2.20006	1.00000	False
ARTHRITIS INFECTIVE	15	1	1	53898	14	553310	0.73328	0.09642	5.57643	1.00000	False
ARTHRITIS REACTIVE	87	10	10	53889	77	553247	1.33324	0.68994	2.57636	0.34784	False
ARTHROGRAM	11	2	2	53897	9	553315	2.28132	0.49291	10.55850	0.25487	False
ARTHROPATHY	753	79	79	53820	674	552650	1.20328	0.95326	1.51887	0.12356	False
ARTHROPOD BITE	128	21	21	53878	107	553217	2.01481	1.26214	3.21633	0.00719	True
ARTHROPOD STING	7	3	3	53896	4	553320	7.69946	1.72323	34.40144	0.01862	True
ARTHROSCOPIC SURGERY	11	1	1	53898	10	553314	1.02659	0.13141	8.01964	1.00000	False
ARTHROSCOPY	10	2	2	53897	8	553316	2.56649	0.54501	12.08576	0.22074	False
ASCITES	97	18	18	53881	79	553245	2.33908	1.40203	3.90238	0.00335	True
ASPARTATE AMINOTRANSFERASE	52	7	7	53892	45	553279	1.59692	0.72021	3.54089	0.22350	False
ASPARTATE AMINOTRANSFERASE ABNORMAL	6	3	3	53896	3	553321	10.26594	2.07202	50.86325	0.01139	True
ASPARTATE AMINOTRANSFERASE DECREASED	14	5	5	53894	9	553315	5.70330	1.91142	17.01755	0.00556	True
ASPARTATE AMINOTRANSFERASE INCREASED	1438	182	182	53717	1256	552068	1.48758	1.27373	1.73734	0.00000	True
ASPARTATE AMINOTRANSFERASE NORMAL	395	39	39	53860	356	552968	1.12464	0.80814	1.56509	0.47854	False
ASPERGER'S DISORDER	26	2	2	53897	24	553300	0.85550	0.20219	3.61980	1.00000	False
ASPERGILLUS TEST NEGATIVE	8	5	5	53894	3	553321	17.10990	4.08901	71.59403	0.00025	True
ASPERGILLUS TEST POSITIVE	2	2	2	53897	0	553324	-100.00000	-100.00000	-100.00000	0.00788	True
ASPHYXIA	111	7	7	53892	104	553220	0.69098	0.32144	1.48533	0.40661	False
ASPIRATION	115	12	12	53887	103	553221	1.19603	0.65785	2.17450	0.51216	False
ASPIRATION BONE MARROW	25	2	2	53897	23	553301	0.89269	0.21047	3.78630	1.00000	False
ASPIRATION BONE MARROW ABNORMAL	24	2	2	53897	22	553302	0.93327	0.21946	3.96881	1.00000	False
ASPIRATION JOINT	42	5	5	53894	37	553287	1.38729	0.54526	3.52965	0.41818	False
ASPIRATION JOINT NORMAL	8	1	1	53898	7	553317	1.46656	0.18043	11.92016	0.52461	False
ASPIRATION PLEURAL CAVITY	13	3	3	53896	10	553314	3.07978	0.84760	11.19043	0.10203	False
ASPIRATION TRACHEAL	18	1	1	53898	17	553307	0.60388	0.08036	4.53771	1.00000	False
ASPIRATION TRACHEAL NORMAL	6	1	1	53898	5	553319	2.05319	0.23987	17.57448	0.42749	False
ASPLENIA	4	1	1	53898	3	553321	3.42198	0.35595	32.89811	0.31052	False
ASTERIXIS	30	1	1	53898	29	553295	0.35400	0.04822	2.59873	0.51529	False
ASTHENIA	17626	2537	2537	51362	15089	538235	1.72607	1.65654	1.79852	0.00000	True
ASTHENOPIA	52	8	8	53891	44	553280	1.86653	0.87880	3.96444	0.13489	False
ASTHMA	2501	384	384	53515	2117	551207	1.86213	1.67090	2.07523	0.00000	True
ASTHMA EXERCISE INDUCED	15	2	2	53897	13	553311	1.57938	0.35641	6.99874	0.38961	False
ASTHMATIC CRISIS	15	2	2	53897	13	553311	1.57938	0.35641	6.99874	0.38961	False
ASTIGMATISM	18	1	1	53898	17	553307	0.60388	0.08036	4.53771	1.00000	False
ATAXIA	457	54	54	53845	403	552921	1.37559	1.03561	1.82718	0.03204	True
ATELECTASIS	173	35	35	53864	138	553186	2.60368	1.79695	3.77259	0.00001	True
ATHEROSCLEROSIS	8	3	3	53896	5	553319	6.15957	1.47204	25.77385	0.02785	True
ATONIC URINARY BLADDER	1	1	1	53898	0	553324	-100.00000	-100.00000	-100.00000	0.08876	False
ATOPY	10	1	1	53898	9	553315	1.14066	0.14451	9.00347	0.60526	False
ATRIAL FIBRILLATION	284	99	99	53800	185	553139	5.49367	4.30461	7.01117	0.00000	True
ATRIAL FLUTTER	34	10	10	53889	24	553300	4.27748	2.04562	8.94440	0.00054	True
ATRIAL SEPTAL DEFECT	46	8	8	53891	38	553286	2.16125	1.00835	4.63234	0.06166	False
ATRIAL TACHYCARDIA	10	1	1	53898	9	553315	1.14066	0.14451	9.00347	0.60526	False
ATRIOVENTRICULAR BLOCK	44	11	11	53888	33	553291	3.42198	1.72960	6.77031	0.00130	True
ATRIOVENTRICULAR BLOCK COMPLETE	8	1	1	53898	7	553317	1.46656	0.18043	11.92016	0.52461	False
ATRIOVENTRICULAR BLOCK FIRST DEGREE	9	1	1	53898	8	553316	1.28324	0.16050	10.26013	0.56681	False
ATRIOVENTRICULAR BLOCK SECOND DEGREE	14	6	6	53893	8	553316	7.69946	2.67157	22.18982	0.00078	True
ATROPHY	38	14	14	53885	24	553300	5.98847	3.09799	11.57580	0.00000	True
ATTENTION-SEEKING BEHAVIOUR	2	1	1	53898	1	553323	10.26594	0.64210	164.13287	0.16965	False
ATTENTION DEFICIT/HYPERACTIVITY DISORDER	99	5	5	53894	94	553230	0.54606	0.22212	1.34243	0.21688	False
ATYPICAL PNEUMONIA	19	7	7	53892	12	553312	5.98847	2.35776	15.21009	0.00084	True
AUDIOGRAM	32	10	10	53889	22	553302	4.66634	2.20982	9.85360	0.00031	True
AUDIOGRAM ABNORMAL	67	14	14	53885	53	553271	2.71176	1.50485	4.88661	0.00200	True
AUDIOGRAM NORMAL	29	2	2	53897	27	553297	0.76044	0.18083	3.19778	1.00000	False
AUDITORY DISORDER	2	1	1	53898	1	553323	10.26594	0.64210	164.13287	0.16965	False
AURA	48	8	8	53891	40	553284	2.05319	0.96112	4.38613	0.07068	False
AURICULAR SWELLING	138	18	18	53881	120	553204	1.53989	0.93836	2.52704	0.09745	False
AUTISM	2476	43	43	53856	2433	550891	0.18144	0.13422	0.24526	0.00000	True
AUTISM SPECTRUM DISORDER	221	2	2	53897	219	553105	0.09375	0.02330	0.37724	0.00000	True
AUTOANTIBODY NEGATIVE	47	6	6	53893	41	553283	1.50233	0.63785	3.53846	0.30640	False
AUTOANTIBODY POSITIVE	33	2	2	53897	31	553293	0.66232	0.15851	2.76738	0.76529	False
AUTOIMMUNE DISORDER	453	50	50	53849	403	552921	1.27369	0.94949	1.70858	0.11561	False
AUTOIMMUNE HAEMOLYTIC ANAEMIA	23	5	5	53894	18	553306	2.85165	1.05877	7.68052	0.04792	True
AUTOIMMUNE HEPATITIS	59	8	8	53891	51	553273	1.61034	0.76427	3.39306	0.24511	False
AUTOIMMUNE NEPHRITIS	1	1	1	53898	0	553324	-100.00000	-100.00000	-100.00000	0.08876	False
AUTOIMMUNE THROMBOCYTOPENIA	68	5	5	53894	63	553261	0.81476	0.32776	2.02536	0.83181	False
AUTOIMMUNE THYROIDITIS	101	4	4	53895	97	553227	0.42334	0.15574	1.15071	0.11147	False
AUTONOMIC NERVOUS SYSTEM IMBALANCE	180	13	13	53886	167	553157	0.79915	0.45452	1.40507	0.51272	False
AUTONOMIC NEUROPATHY	17	4	4	53895	13	553311	3.15875	1.02998	9.68729	0.05786	False
AUTOPSY	483	33	33	53866	450	552874	0.75284	0.52873	1.07193	0.12777	False
AXILLARY MASS	155	21	21	53878	134	553190	1.60884	1.01572	2.54831	0.04732	True
AXILLARY NERVE INJURY	5	1	1	53898	4	553320	2.56649	0.28685	22.96259	0.37172	False
AXILLARY PAIN	979	185	185	53714	794	552530	2.39194	2.03875	2.80631	0.00000	True
AXILLARY VEIN THROMBOSIS	2	1	1	53898	1	553323	10.26594	0.64210	164.13287	0.16965	False
AXONAL NEUROPATHY	37	7	7	53892	30	553294	2.39539	1.05220	5.45323	0.04180	True
AZOTAEMIA	32	3	3	53896	29	553295	1.06199	0.32351	3.48620	0.75962	False
B-LYMPHOCYTE COUNT	11	2	2	53897	9	553315	2.28132	0.49291	10.55850	0.25487	False
B-LYMPHOCYTE COUNT DECREASED	13	1	1	53898	12	553312	0.85550	0.11124	6.57937	1.00000	False
BABINSKI REFLEX TEST	33	2	2	53897	31	553293	0.66232	0.15851	2.76738	0.76529	False
BACILLUS INFECTION	5	1	1	53898	4	553320	2.56649	0.28685	22.96259	0.37172	False
BACK DISORDER	22	5	5	53894	17	553307	3.01939	1.11399	8.18384	0.04036	True
BACK INJURY	22	5	5	53894	17	553307	3.01939	1.11399	8.18384	0.04036	True
BACK PAIN	5994	990	990	52909	5004	548320	2.03103	1.89827	2.17308	0.00000	True
BACTERAEMIA	146	7	7	53892	139	553185	0.51699	0.24198	1.10456	0.10679	False
BACTERIA URINE IDENTIFIED	14	2	2	53897	12	553312	1.71099	0.38294	7.64476	0.35667	False
BACTERIAL CULTURE	22	1	1	53898	21	553303	0.48885	0.06576	3.63429	0.71640	False
BACTERIAL CULTURE NEGATIVE	38	6	6	53893	32	553292	1.92486	0.80488	4.60329	0.14566	False
BACTERIAL DISEASE CARRIER	4	1	1	53898	3	553321	3.42198	0.35595	32.89811	0.31052	False
BACTERIAL DNA TEST	2	1	1	53898	1	553323	10.26594	0.64210	164.13287	0.16965	False
BACTERIAL DNA TEST POSITIVE	2	1	1	53898	1	553323	10.26594	0.64210	164.13287	0.16965	False
BACTERIAL INFECTION	1334	127	127	53772	1207	552117	1.08018	0.89987	1.29661	0.41243	False
BACTERIAL SEPSIS	9	1	1	53898	8	553316	1.28324	0.16050	10.26013	0.56681	False
BACTERIAL TEST	115	19	19	53880	96	553228	2.03180	1.24217	3.32340	0.00777	True
BACTERIAL TEST NEGATIVE	418	47	47	53852	371	552953	1.30054	0.96025	1.76141	0.10125	False
BACTERIAL TEST POSITIVE	165	18	18	53881	147	553177	1.25705	0.77059	2.05061	0.33795	False
BACTERIAL TOXAEMIA	2	1	1	53898	1	553323	10.26594	0.64210	164.13287	0.16965	False
BALANCE DISORDER	1601	271	271	53628	1330	551994	2.09178	1.83618	2.38297	0.00000	True
BALANITIS	14	2	2	53897	12	553312	1.71099	0.38294	7.64476	0.35667	False
BALLISMUS	2	1	1	53898	1	553323	10.26594	0.64210	164.13287	0.16965	False
BAND NEUTROPHIL COUNT	24	4	4	53895	20	553304	2.05319	0.70180	6.00681	0.15905	False
BAND NEUTROPHIL COUNT DECREASED	19	2	2	53897	17	553307	1.20776	0.27904	5.22747	0.68352	False
BAND NEUTROPHIL COUNT INCREASED	28	10	10	53889	18	553306	5.70330	2.63284	12.35461	0.00009	True
BAND NEUTROPHIL PERCENTAGE	39	8	8	53891	31	553293	2.64928	1.21785	5.76318	0.01948	True
BAND NEUTROPHIL PERCENTAGE INCREASED	32	4	4	53895	28	553296	1.46656	0.51443	4.18099	0.52547	False
BANDAEMIA	3	1	1	53898	2	553322	5.13297	0.46543	56.60902	0.24335	False
BARBITURATES NEGATIVE	1	1	1	53898	0	553324	-100.00000	-100.00000	-100.00000	0.08876	False
BARIUM DOUBLE CONTRAST	103	4	4	53895	99	553225	0.41479	0.15266	1.12701	0.08184	False
BARIUM ENEMA	176	11	11	53888	165	553159	0.68440	0.37176	1.25994	0.28701	False
BARIUM ENEMA ABNORMAL	67	1	1	53898	66	553258	0.15554	0.02159	1.12070	0.02905	True
BARIUM SWALLOW	17	4	4	53895	13	553311	3.15875	1.02998	9.68729	0.05786	False
BARIUM SWALLOW ABNORMAL	7	2	2	53897	5	553319	4.10638	0.79669	21.16547	0.12257	False
BAROTRAUMA	1	1	1	53898	0	553324	-100.00000	-100.00000	-100.00000	0.08876	False
BARRETT'S OESOPHAGUS	4	1	1	53898	3	553321	3.42198	0.35595	32.89811	0.31052	False
BARTONELLA TEST NEGATIVE	12	2	2	53897	10	553314	2.05319	0.44987	9.37060	0.28908	False
BASAL CELL CARCINOMA	18	3	3	53896	15	553309	2.05319	0.59441	7.09206	0.21088	False
BASAL GANGLIA STROKE	4	1	1	53898	3	553321	3.42198	0.35595	32.89811	0.31052	False
BASE EXCESS DECREASED	55	3	3	53896	52	553272	0.59227	0.18497	1.89640	0.48222	False
BASE EXCESS INCREASED	17	1	1	53898	16	553308	0.64162	0.08509	4.83821	1.00000	False
BASE EXCESS NEGATIVE	31	1	1	53898	30	553294	0.34220	0.04667	2.50932	0.51983	False
BASEDOW'S DISEASE	35	2	2	53897	33	553291	0.62218	0.14930	2.59284	0.76621	False
BASOPHIL COUNT	12	4	4	53895	8	553316	5.13297	1.54569	17.04577	0.01717	True
BASOPHIL COUNT DECREASED	72	9	9	53890	63	553261	1.46656	0.72945	2.94853	0.29509	False
BASOPHIL COUNT INCREASED	32	6	6	53893	26	553298	2.36906	0.97515	5.75550	0.05964	False
BASOPHIL COUNT NORMAL	107	20	20	53879	87	553237	2.35999	1.45164	3.83672	0.00166	True
BASOPHIL PERCENTAGE	116	16	16	53883	100	553224	1.64255	0.96907	2.78409	0.07103	False
BASOPHIL PERCENTAGE DECREASED	131	16	16	53883	115	553209	1.42830	0.84670	2.40943	0.16813	False
BASOPHIL PERCENTAGE INCREASED	39	2	2	53897	37	553287	0.55492	0.13375	2.30234	0.57760	False
BASOPHILIA	10	1	1	53898	9	553315	1.14066	0.14451	9.00347	0.60526	False
BED REST	160	19	19	53880	141	553183	1.38335	0.85693	2.23317	0.20823	False
BED SHARING	12	1	1	53898	11	553313	0.93327	0.12049	7.22878	1.00000	False
BEDRIDDEN	230	35	35	53864	195	553129	1.84260	1.28593	2.64026	0.00161	True
BEHCET'S SYNDROME	21	3	3	53896	18	553306	1.71099	0.50400	5.80846	0.42661	False
BENIGN INTRACRANIAL HYPERTENSION	34	4	4	53895	30	553294	1.36879	0.48224	3.88523	0.53968	False
BENIGN PROSTATIC HYPERPLASIA	12	7	7	53892	5	553319	14.37232	4.56163	45.28285	0.00002	True
BENIGN TUMOUR EXCISION	1	1	1	53898	0	553324	-100.00000	-100.00000	-100.00000	0.08876	False
BETA-2 GLYCOPROTEIN ANTIBODY NEGATIVE	13	1	1	53898	12	553312	0.85550	0.11124	6.57937	1.00000	False
BETA 2 GLOBULIN	3	2	2	53897	1	553323	20.53188	1.86171	226.43607	0.02224	True
BETA 2 MICROGLOBULIN	5	1	1	53898	4	553320	2.56649	0.28685	22.96259	0.37172	False
BETA GLOBULIN	11	3	3	53896	8	553316	3.84973	1.02133	14.51089	0.06715	False
BETA GLOBULIN INCREASED	4	1	1	53898	3	553321	3.42198	0.35595	32.89811	0.31052	False
BETA GLOBULIN NORMAL	18	3	3	53896	15	553309	2.05319	0.59441	7.09206	0.21088	False
BETA HAEMOLYTIC STREPTOCOCCAL INFECTION	32	2	2	53897	30	553294	0.68440	0.16356	2.86376	1.00000	False
BICYTOPENIA	7	3	3	53896	4	553320	7.69946	1.72323	34.40144	0.01862	True
BILE DUCT STENOSIS	1	1	1	53898	0	553324	-100.00000	-100.00000	-100.00000	0.08876	False
BILEVEL POSITIVE AIRWAY PRESSURE	27	11	11	53888	16	553308	7.05784	3.27562	15.20721	0.00001	True
BILIARY CIRRHOSIS	3	1	1	53898	2	553322	5.13297	0.46543	56.60902	0.24335	False
BILIARY COLIC	11	2	2	53897	9	553315	2.28132	0.49291	10.55850	0.25487	False
BILIARY TRACT DISORDER	1	1	1	53898	0	553324	-100.00000	-100.00000	-100.00000	0.08876	False
BILIRUBIN CONJUGATED	35	4	4	53895	31	553293	1.32464	0.46760	3.75245	0.54803	False
BILIRUBIN CONJUGATED ABNORMAL	8	2	2	53897	6	553318	3.42198	0.69067	16.95442	0.15415	False
BILIRUBIN CONJUGATED INCREASED	75	10	10	53889	65	553259	1.57938	0.81165	3.07329	0.21750	False
BILIRUBIN CONJUGATED NORMAL	30	5	5	53894	25	553299	2.05319	0.78603	5.36316	0.18378	False
BILIRUBIN URINE	42	7	7	53892	35	553289	2.05319	0.91204	4.62216	0.09494	False
BILIRUBINURIA	18	2	2	53897	16	553308	1.28324	0.29506	5.58098	0.67097	False
BIOPSY	284	72	72	53827	212	553112	3.48655	2.66901	4.55450	0.00000	True
BIOPSY ARTERY	4	1	1	53898	3	553321	3.42198	0.35595	32.89811	0.31052	False
BIOPSY ARTERY ABNORMAL	13	1	1	53898	12	553312	0.85550	0.11124	6.57937	1.00000	False
BIOPSY ARTERY NORMAL	9	3	3	53896	6	553318	5.13297	1.28375	20.52381	0.03906	True
BIOPSY BLADDER	2	1	1	53898	1	553323	10.26594	0.64210	164.13287	0.16965	False
BIOPSY BONE	4	1	1	53898	3	553321	3.42198	0.35595	32.89811	0.31052	False
BIOPSY BONE MARROW	65	15	15	53884	50	553274	3.07978	1.72965	5.48381	0.00047	True
BIOPSY BONE MARROW ABNORMAL	56	7	7	53892	49	553275	1.46656	0.66432	3.23760	0.34191	False
BIOPSY BONE MARROW NORMAL	47	3	3	53896	44	553280	0.69995	0.21735	2.25414	0.79658	False
BIOPSY BRAIN	8	1	1	53898	7	553317	1.46656	0.18043	11.92016	0.52461	False
BIOPSY BRAIN ABNORMAL	32	2	2	53897	30	553294	0.68440	0.16356	2.86376	1.00000	False
BIOPSY BREAST ABNORMAL	3	1	1	53898	2	553322	5.13297	0.46543	56.60902	0.24335	False
BIOPSY BRONCHUS ABNORMAL	2	1	1	53898	1	553323	10.26594	0.64210	164.13287	0.16965	False
BIOPSY BRONCHUS NORMAL	1	1	1	53898	0	553324	-100.00000	-100.00000	-100.00000	0.08876	False
BIOPSY CHORIONIC VILLOUS	1	1	1	53898	0	553324	-100.00000	-100.00000	-100.00000	0.08876	False
BIOPSY COLON ABNORMAL	17	2	2	53897	15	553309	1.36879	0.31302	5.98548	0.65898	False
BIOPSY KIDNEY	11	2	2	53897	9	553315	2.28132	0.49291	10.55850	0.25487	False
BIOPSY KIDNEY ABNORMAL	74	9	9	53890	65	553259	1.42144	0.70796	2.85397	0.30486	False
BIOPSY KIDNEY NORMAL	2	1	1	53898	1	553323	10.26594	0.64210	164.13287	0.16965	False
BIOPSY LIP	2	1	1	53898	1	553323	10.26594	0.64210	164.13287	0.16965	False
BIOPSY LIVER	12	2	2	53897	10	553314	2.05319	0.44987	9.37060	0.28908	False
BIOPSY LIVER ABNORMAL	38	7	7	53892	31	553293	2.31812	1.02082	5.26407	0.07669	False
BIOPSY LIVER NORMAL	8	1	1	53898	7	553317	1.46656	0.18043	11.92016	0.52461	False
BIOPSY LUNG	14	2	2	53897	12	553312	1.71099	0.38294	7.64476	0.35667	False
BIOPSY LUNG ABNORMAL	26	7	7	53892	19	553305	3.78219	1.59003	8.99667	0.00627	True
BIOPSY LUNG NORMAL	3	2	2	53897	1	553323	20.53188	1.86171	226.43607	0.02224	True
BIOPSY LYMPH GLAND	28	3	3	53896	25	553299	1.23191	0.37196	4.08008	0.73431	False
BIOPSY LYMPH GLAND ABNORMAL	28	4	4	53895	24	553300	1.71099	0.59368	4.93107	0.30797	False
BIOPSY MUCOSA ABNORMAL	3	1	1	53898	2	553322	5.13297	0.46543	56.60902	0.24335	False
BIOPSY MUSCLE	48	12	12	53887	36	553288	3.42198	1.78059	6.57644	0.00079	True
BIOPSY MUSCLE ABNORMAL	166	14	14	53885	152	553172	0.94555	0.54698	1.63454	1.00000	False
BIOPSY MUSCLE NORMAL	27	3	3	53896	24	553300	1.28324	0.38642	4.26144	0.72925	False
BIOPSY OESOPHAGUS	2	1	1	53898	1	553323	10.26594	0.64210	164.13287	0.16965	False
BIOPSY OESOPHAGUS NORMAL	3	1	1	53898	2	553322	5.13297	0.46543	56.60902	0.24335	False
BIOPSY PERIPHERAL NERVE	14	4	4	53895	10	553314	4.10638	1.28791	13.09275	0.03009	True
BIOPSY PERIPHERAL NERVE ABNORMAL	9	1	1	53898	8	553316	1.28324	0.16050	10.26013	0.56681	False
BIOPSY PROSTATE	2	1	1	53898	1	553323	10.26594	0.64210	164.13287	0.16965	False
BIOPSY PROSTATE NORMAL	2	1	1	53898	1	553323	10.26594	0.64210	164.13287	0.16965	False
BIOPSY SITE UNSPECIFIED ABNORMAL	43	3	3	53896	40	553284	0.76995	0.23819	2.48881	1.00000	False
BIOPSY SITE UNSPECIFIED NORMAL	33	3	3	53896	30	553294	1.02659	0.31331	3.36374	1.00000	False
BIOPSY SKIN	158	48	48	53851	110	553214	4.47968	3.19189	6.28704	0.00000	True
BIOPSY SKIN ABNORMAL	348	72	72	53827	276	553048	2.67807	2.06654	3.47057	0.00000	True
BIOPSY SKIN NORMAL	41	11	11	53888	30	553294	3.76418	1.88650	7.51074	0.00069	True
BIOPSY SMALL INTESTINE ABNORMAL	3	1	1	53898	2	553322	5.13297	0.46543	56.60902	0.24335	False
BIOPSY STOMACH	6	1	1	53898	5	553319	2.05319	0.23987	17.57448	0.42749	False
BIOPSY STOMACH ABNORMAL	4	1	1	53898	3	553321	3.42198	0.35595	32.89811	0.31052	False
BIOPSY THYROID GLAND	2	1	1	53898	1	553323	10.26594	0.64210	164.13287	0.16965	False
BIPOLAR I DISORDER	6	1	1	53898	5	553319	2.05319	0.23987	17.57448	0.42749	False
BITE	12	1	1	53898	11	553313	0.93327	0.12049	7.22878	1.00000	False
BLADDER CATHETERISATION	62	7	7	53892	55	553269	1.30657	0.59507	2.86882	0.49893	False
BLADDER DISCOMFORT	4	1	1	53898	3	553321	3.42198	0.35595	32.89811	0.31052	False
BLADDER DISORDER	37	4	4	53895	33	553291	1.24436	0.44085	3.51232	0.56676	False
BLADDER DYSFUNCTION	24	5	5	53894	19	553305	2.70156	1.00876	7.23504	0.05626	False
BLADDER PAIN	19	1	1	53898	18	553306	0.57033	0.07614	4.27229	1.00000	False
BLADDER SCAN	5	1	1	53898	4	553320	2.56649	0.28685	22.96259	0.37172	False
BLADDER SPHINCTER ATONY	6	1	1	53898	5	553319	2.05319	0.23987	17.57448	0.42749	False
BLAST CELLS ABSENT	1	1	1	53898	0	553324	-100.00000	-100.00000	-100.00000	0.08876	False
BLAST CELLS PRESENT	5	1	1	53898	4	553320	2.56649	0.28685	22.96259	0.37172	False
BLASTOMYCOSIS	1	1	1	53898	0	553324	-100.00000	-100.00000	-100.00000	0.08876	False
BLEEDING TIME NORMAL	4	2	2	53897	2	553322	10.26594	1.44607	72.87982	0.04186	True
BLEEDING TIME PROLONGED	17	2	2	53897	15	553309	1.36879	0.31302	5.98548	0.65898	False
BLEPHARITIS	24	1	1	53898	23	553301	0.44635	0.06028	3.30512	0.71863	False
BLEPHAROSPASM	167	15	15	53884	152	553172	1.01309	0.59608	1.72182	0.89205	False
BLINDNESS	651	49	49	53850	602	552722	0.83560	0.62460	1.11788	0.24142	False
BLINDNESS CORTICAL	6	1	1	53898	5	553319	2.05319	0.23987	17.57448	0.42749	False
BLINDNESS TRANSIENT	118	14	14	53885	104	553220	1.38195	0.79104	2.41429	0.25503	False
BLINDNESS UNILATERAL	127	18	18	53881	109	553215	1.69529	1.02970	2.79112	0.04204	True
BLISTER	4931	785	785	53114	4146	549178	1.94374	1.80190	2.09676	0.00000	True
BLISTER INFECTED	4	1	1	53898	3	553321	3.42198	0.35595	32.89811	0.31052	False
BLISTER RUPTURE	8	1	1	53898	7	553317	1.46656	0.18043	11.92016	0.52461	False
BLOOD 25-HYDROXYCHOLECALCIFEROL	20	4	4	53895	16	553308	2.56649	0.85804	7.67659	0.09550	False
BLOOD 25-HYDROXYCHOLECALCIFEROL DECREASED	7	2	2	53897	5	553319	4.10638	0.79669	21.16547	0.12257	False
BLOOD ALBUMIN	46	10	10	53889	36	553288	2.85165	1.41529	5.74577	0.00627	True
BLOOD ALBUMIN DECREASED	193	28	28	53871	165	553159	1.74210	1.16717	2.60022	0.01057	True
BLOOD ALBUMIN INCREASED	36	9	9	53890	27	553297	3.42198	1.60941	7.27593	0.00350	True
BLOOD ALBUMIN NORMAL	169	26	26	53873	143	553181	1.86653	1.22913	2.83449	0.00615	True
BLOOD ALCOHOL INCREASED	3	1	1	53898	2	553322	5.13297	0.46543	56.60902	0.24335	False
BLOOD ALDOSTERONE NORMAL	6	1	1	53898	5	553319	2.05319	0.23987	17.57448	0.42749	False
BLOOD ALKALINE PHOSPHATASE	26	5	5	53894	21	553303	2.44427	0.92170	6.48200	0.07528	False
BLOOD ALKALINE PHOSPHATASE DECREASED	9	3	3	53896	6	553318	5.13297	1.28375	20.52381	0.03906	True
BLOOD ALKALINE PHOSPHATASE INCREASED	522	83	83	53816	439	552885	1.94094	1.53533	2.45371	0.00000	True
BLOOD ALKALINE PHOSPHATASE NORMAL	220	35	35	53864	185	553139	1.94221	1.35344	2.78709	0.00077	True
BLOOD ALUMINIUM INCREASED	34	1	1	53898	33	553291	0.31109	0.04255	2.27454	0.36260	False
BLOOD AMYLASE	55	2	2	53897	53	553271	0.38739	0.09441	1.58962	0.23452	False
BLOOD AMYLASE INCREASED	181	11	11	53888	170	553154	0.66427	0.36103	1.22219	0.23756	False
BLOOD AMYLASE NORMAL	48	2	2	53897	46	553278	0.44635	0.10835	1.83868	0.43991	False
BLOOD BICARBONATE	13	3	3	53896	10	553314	3.07978	0.84760	11.19043	0.10203	False
BLOOD BICARBONATE ABNORMAL	3	2	2	53897	1	553323	20.53188	1.86171	226.43607	0.02224	True
BLOOD BICARBONATE DECREASED	87	13	13	53886	74	553250	1.80348	1.00036	3.25136	0.05710	False
BLOOD BICARBONATE INCREASED	21	6	6	53893	15	553309	4.10638	1.59331	10.58322	0.00823	True
BLOOD BICARBONATE NORMAL	92	14	14	53885	78	553246	1.84260	1.04325	3.25442	0.04185	True
BLOOD BILIRUBIN	47	10	10	53889	37	553287	2.77458	1.37988	5.57897	0.00734	True
BLOOD BILIRUBIN DECREASED	36	3	3	53896	33	553291	0.93327	0.28623	3.04295	1.00000	False
BLOOD BILIRUBIN INCREASED	412	57	57	53842	355	552969	1.64833	1.24636	2.17995	0.00092	True
BLOOD BILIRUBIN NORMAL	220	38	38	53861	182	553142	2.14344	1.51127	3.04005	0.00007	True
BLOOD BILIRUBIN UNCONJUGATED INCREASED	33	2	2	53897	31	553293	0.66232	0.15851	2.76738	0.76529	False
BLOOD BILIRUBIN UNCONJUGATED NORMAL	8	1	1	53898	7	553317	1.46656	0.18043	11.92016	0.52461	False
BLOOD BLISTER	27	5	5	53894	22	553302	2.33317	0.88357	6.16099	0.08594	False
BLOOD CAFFEINE	2	1	1	53898	1	553323	10.26594	0.64210	164.13287	0.16965	False
BLOOD CALCITONIN	2	1	1	53898	1	553323	10.26594	0.64210	164.13287	0.16965	False
BLOOD CALCIUM	29	7	7	53892	22	553302	3.26644	1.39543	7.64608	0.01177	True
BLOOD CALCIUM DECREASED	134	20	20	53879	114	553210	1.80104	1.11995	2.89633	0.02125	True
BLOOD CALCIUM INCREASED	104	18	18	53881	86	553238	2.14869	1.29292	3.57086	0.00525	True
BLOOD CALCIUM NORMAL	315	41	41	53858	274	553050	1.53614	1.10649	2.13264	0.01299	True
BLOOD CHLORIDE	28	6	6	53893	22	553302	2.79980	1.13528	6.90479	0.03350	True
BLOOD CHLORIDE ABNORMAL	1	1	1	53898	0	553324	-100.00000	-100.00000	-100.00000	0.08876	False
BLOOD CHLORIDE DECREASED	64	16	16	53883	48	553276	3.42198	1.94349	6.02522	0.00011	True
BLOOD CHLORIDE INCREASED	68	14	14	53885	54	553270	2.66154	1.47867	4.79065	0.00232	True
BLOOD CHLORIDE NORMAL	353	51	51	53848	302	553022	1.73365	1.28870	2.33223	0.00068	True
BLOOD CHOLESTEROL	29	9	9	53890	20	553304	4.61967	2.10361	10.14511	0.00066	True
BLOOD CHOLESTEROL ABNORMAL	1	1	1	53898	0	553324	-100.00000	-100.00000	-100.00000	0.08876	False
BLOOD CHOLESTEROL DECREASED	9	3	3	53896	6	553318	5.13297	1.28375	20.52381	0.03906	True
BLOOD CHOLESTEROL INCREASED	174	32	32	53867	142	553182	2.31345	1.57665	3.39458	0.00008	True
BLOOD CHOLESTEROL NORMAL	76	15	15	53884	61	553263	2.52441	1.43505	4.44071	0.00340	True
BLOOD CHOLINESTERASE DECREASED	5	2	2	53897	3	553321	6.84396	1.14358	40.95901	0.06571	False
BLOOD CHOLINESTERASE INCREASED	22	1	1	53898	21	553303	0.48885	0.06576	3.63429	0.71640	False
BLOOD CHROMOGRANIN A	2	1	1	53898	1	553323	10.26594	0.64210	164.13287	0.16965	False
BLOOD COPPER	9	2	2	53897	7	553317	2.93313	0.60933	14.11926	0.18703	False
BLOOD COPPER NORMAL	9	2	2	53897	7	553317	2.93313	0.60933	14.11926	0.18703	False
BLOOD CORTICOTROPHIN	6	3	3	53896	3	553321	10.26594	2.07202	50.86325	0.01139	True
BLOOD CORTICOTROPHIN INCREASED	3	2	2	53897	1	553323	20.53188	1.86171	226.43607	0.02224	True
BLOOD CORTISOL	14	3	3	53896	11	553313	2.79980	0.78111	10.03564	0.12166	False
BLOOD CORTISOL DECREASED	9	3	3	53896	6	553318	5.13297	1.28375	20.52381	0.03906	True
BLOOD CORTISOL INCREASED	8	2	2	53897	6	553318	3.42198	0.69067	16.95442	0.15415	False
BLOOD CORTISOL NORMAL	27	2	2	53897	25	553299	0.82128	0.19453	3.46730	1.00000	False
BLOOD COUNT	84	4	4	53895	80	553244	0.51330	0.18805	1.40111	0.24745	False
BLOOD COUNT ABNORMAL	35	3	3	53896	32	553292	0.96243	0.29472	3.14287	1.00000	False
BLOOD COUNT NORMAL	180	11	11	53888	169	553155	0.66820	0.36313	1.22956	0.23682	False
BLOOD CREATINE	20	2	2	53897	18	553306	1.14066	0.26467	4.91592	0.69643	False
BLOOD CREATINE INCREASED	13	6	6	53893	7	553317	8.79938	2.95729	26.18243	0.00048	True
BLOOD CREATINE NORMAL	20	1	1	53898	19	553305	0.54031	0.07233	4.03615	1.00000	False
BLOOD CREATINE PHOSPHOKINASE	186	35	35	53864	151	553173	2.37952	1.64758	3.43663	0.00002	True
BLOOD CREATINE PHOSPHOKINASE DECREASED	23	3	3	53896	20	553304	1.53989	0.45760	5.18201	0.45281	False
BLOOD CREATINE PHOSPHOKINASE INCREASED	763	117	117	53782	646	552678	1.85931	1.52726	2.26355	0.00000	True
BLOOD CREATINE PHOSPHOKINASE MB	89	9	9	53890	80	553244	1.15492	0.57983	2.30039	0.70735	False
BLOOD CREATINE PHOSPHOKINASE MB INCREASED	116	15	15	53884	101	553223	1.52464	0.88646	2.62226	0.13877	False
BLOOD CREATINE PHOSPHOKINASE MB NORMAL	33	5	5	53894	28	553296	1.83320	0.70788	4.74747	0.21105	False
BLOOD CREATINE PHOSPHOKINASE NORMAL	372	63	63	53836	309	553015	2.09306	1.59652	2.74402	0.00000	True
BLOOD CREATININE	89	17	17	53882	72	553252	2.42390	1.42894	4.11165	0.00224	True
BLOOD CREATININE ABNORMAL	3	2	2	53897	1	553323	20.53188	1.86171	226.43607	0.02224	True
BLOOD CREATININE DECREASED	89	5	5	53894	84	553240	0.61107	0.24789	1.50630	0.35250	False
BLOOD CREATININE INCREASED	452	138	138	53761	314	553010	4.51178	3.69399	5.51062	0.00000	True
BLOOD CREATININE NORMAL	557	86	86	53813	471	552853	1.87446	1.48982	2.35842	0.00000	True
BLOOD CULTURE	675	108	108	53791	567	552757	1.95542	1.59204	2.40174	0.00000	True
BLOOD CULTURE NEGATIVE	1239	198	198	53701	1041	552283	1.95260	1.67776	2.27247	0.00000	True
BLOOD CULTURE POSITIVE	550	27	27	53872	523	552801	0.52998	0.36001	0.78021	0.00054	True
BLOOD CYTOKINE TEST	32	1	1	53898	31	553293	0.33116	0.04521	2.42586	0.36011	False
BLOOD DISORDER	70	11	11	53888	59	553265	1.91399	1.00557	3.64307	0.05558	False
BLOOD ELASTASE DECREASED	2	1	1	53898	1	553323	10.26594	0.64210	164.13287	0.16965	False
BLOOD ELECTROLYTES	104	17	17	53882	87	553237	2.00599	1.19300	3.37301	0.01403	True
BLOOD ELECTROLYTES ABNORMAL	14	5	5	53894	9	553315	5.70330	1.91142	17.01755	0.00556	True
BLOOD ELECTROLYTES DECREASED	8	2	2	53897	6	553318	3.42198	0.69067	16.95442	0.15415	False
BLOOD ELECTROLYTES INCREASED	2	2	2	53897	0	553324	-100.00000	-100.00000	-100.00000	0.00788	True
BLOOD ELECTROLYTES NORMAL	482	53	53	53846	429	552895	1.26829	0.95354	1.68692	0.10851	False
BLOOD ERYTHROPOIETIN INCREASED	2	1	1	53898	1	553323	10.26594	0.64210	164.13287	0.16965	False
BLOOD FIBRINOGEN DECREASED	32	3	3	53896	29	553295	1.06199	0.32351	3.48620	0.75962	False
BLOOD FIBRINOGEN INCREASED	73	7	7	53892	66	553258	1.08881	0.49959	2.37297	0.83566	False
BLOOD FIBRINOGEN NORMAL	60	5	5	53894	55	553269	0.93327	0.37361	2.33126	1.00000	False
BLOOD FOLATE	27	10	10	53889	17	553307	6.03879	2.76528	13.18745	0.00006	True
BLOOD FOLATE DECREASED	7	2	2	53897	5	553319	4.10638	0.79669	21.16547	0.12257	False
BLOOD FOLATE INCREASED	8	2	2	53897	6	553318	3.42198	0.69067	16.95442	0.15415	False
BLOOD FOLATE NORMAL	94	23	23	53876	71	553253	3.32559	2.07816	5.32180	0.00001	True
BLOOD FOLLICLE STIMULATING HORMONE	5	1	1	53898	4	553320	2.56649	0.28685	22.96259	0.37172	False
BLOOD FOLLICLE STIMULATING HORMONE DECREASED	3	1	1	53898	2	553322	5.13297	0.46543	56.60902	0.24335	False
BLOOD FOLLICLE STIMULATING HORMONE INCREASED	17	2	2	53897	15	553309	1.36879	0.31302	5.98548	0.65898	False
BLOOD FOLLICLE STIMULATING HORMONE NORMAL	6	1	1	53898	5	553319	2.05319	0.23987	17.57448	0.42749	False
BLOOD GASES	56	15	15	53884	41	553283	3.75583	2.07910	6.78481	0.00008	True
BLOOD GASES ABNORMAL	43	4	4	53895	39	553285	1.05292	0.37628	2.94632	0.79044	False
BLOOD GASES NORMAL	77	4	4	53895	73	553251	0.56252	0.20561	1.53898	0.31909	False
BLOOD GLUCOSE	262	50	50	53849	212	553112	2.42121	1.77936	3.29460	0.00000	True
BLOOD GLUCOSE ABNORMAL	76	11	11	53888	65	553259	1.73731	0.91703	3.29133	0.10224	False
BLOOD GLUCOSE DECREASED	297	55	55	53844	242	553082	2.33317	1.74121	3.12638	0.00000	True
BLOOD GLUCOSE FLUCTUATION	22	8	8	53891	14	553310	5.86625	2.46104	13.98308	0.00039	True
BLOOD GLUCOSE INCREASED	908	194	194	53705	714	552610	2.78935	2.38063	3.26824	0.00000	True
BLOOD GLUCOSE NORMAL	1141	147	147	53752	994	552330	1.51820	1.27705	1.80489	0.00001	True
BLOOD GROUP A	2	1	1	53898	1	553323	10.26594	0.64210	164.13287	0.16965	False
BLOOD GROUP O	10	1	1	53898	9	553315	1.14066	0.14451	9.00347	0.60526	False
BLOOD GROWTH HORMONE	1	1	1	53898	0	553324	-100.00000	-100.00000	-100.00000	0.08876	False
BLOOD GROWTH HORMONE ABNORMAL	1	1	1	53898	0	553324	-100.00000	-100.00000	-100.00000	0.08876	False
BLOOD HEAVY METAL INCREASED	29	1	1	53898	28	553296	0.36664	0.04988	2.69474	0.51198	False
BLOOD HEAVY METAL NORMAL	20	4	4	53895	16	553308	2.56649	0.85804	7.67659	0.09550	False
BLOOD HEAVY METAL TEST	27	2	2	53897	25	553299	0.82128	0.19453	3.46730	1.00000	False
BLOOD HIV RNA	5	2	2	53897	3	553321	6.84396	1.14358	40.95901	0.06571	False
BLOOD HIV RNA BELOW ASSAY LIMIT	9	3	3	53896	6	553318	5.13297	1.28375	20.52381	0.03906	True
BLOOD HIV RNA DECREASED	3	1	1	53898	2	553322	5.13297	0.46543	56.60902	0.24335	False
BLOOD HIV RNA INCREASED	12	3	3	53896	9	553315	3.42198	0.92643	12.63987	0.08381	False
BLOOD HOMOCYSTEINE	10	2	2	53897	8	553316	2.56649	0.54501	12.08576	0.22074	False
BLOOD HOMOCYSTEINE NORMAL	19	3	3	53896	16	553308	1.92486	0.56088	6.60590	0.23506	False
BLOOD HUMAN CHORIONIC GONADOTROPIN	24	3	3	53896	21	553303	1.46656	0.43745	4.91665	0.46747	False
BLOOD HUMAN CHORIONIC GONADOTROPIN INCREASED	10	1	1	53898	9	553315	1.14066	0.14451	9.00347	0.60526	False
BLOOD HUMAN CHORIONIC GONADOTROPIN NEGATIVE	27	3	3	53896	24	553300	1.28324	0.38642	4.26144	0.72925	False
BLOOD HUMAN CHORIONIC GONADOTROPIN POSITIVE	111	15	15	53884	96	553228	1.60405	0.93093	2.76388	0.09353	False
BLOOD IMMUNOGLOBULIN A	103	4	4	53895	99	553225	0.41479	0.15266	1.12701	0.08184	False
BLOOD IMMUNOGLOBULIN A ABNORMAL	4	2	2	53897	2	553322	10.26594	1.44607	72.87982	0.04186	True
BLOOD IMMUNOGLOBULIN A DECREASED	37	2	2	53897	35	553289	0.58663	0.14110	2.43898	0.76954	False
BLOOD IMMUNOGLOBULIN A INCREASED	46	7	7	53892	39	553285	1.84260	0.82422	4.11930	0.12357	False
BLOOD IMMUNOGLOBULIN A NORMAL	118	12	12	53887	106	553218	1.16218	0.63980	2.11109	0.62548	False
BLOOD IMMUNOGLOBULIN E	93	7	7	53892	86	553238	0.83560	0.38677	1.80528	0.85463	False
BLOOD IMMUNOGLOBULIN E DECREASED	4	1	1	53898	3	553321	3.42198	0.35595	32.89811	0.31052	False
BLOOD IMMUNOGLOBULIN E INCREASED	125	16	16	53883	109	553215	1.50693	0.89174	2.54653	0.15354	False
BLOOD IMMUNOGLOBULIN E NORMAL	49	7	7	53892	42	553282	1.71099	0.76871	3.80833	0.20132	False
BLOOD IMMUNOGLOBULIN G	315	26	26	53873	289	553035	0.92358	0.61835	1.37949	0.76669	False
BLOOD IMMUNOGLOBULIN G ABNORMAL	13	2	2	53897	11	553313	1.86653	0.41372	8.42094	0.32309	False
BLOOD IMMUNOGLOBULIN G DECREASED	97	6	6	53893	91	553233	0.67688	0.29631	1.54621	0.47352	False
BLOOD IMMUNOGLOBULIN G INCREASED	138	11	11	53888	127	553197	0.88918	0.48026	1.64625	0.88064	False
BLOOD IMMUNOGLOBULIN G NORMAL	256	28	28	53871	228	553096	1.26073	0.85155	1.86653	0.27015	False
BLOOD IMMUNOGLOBULIN M	330	22	22	53877	308	553016	0.73328	0.47584	1.13001	0.17515	False
BLOOD IMMUNOGLOBULIN M ABNORMAL	9	1	1	53898	8	553316	1.28324	0.16050	10.26013	0.56681	False
BLOOD IMMUNOGLOBULIN M DECREASED	57	4	4	53895	53	553271	0.77479	0.28043	2.14064	0.81638	False
BLOOD IMMUNOGLOBULIN M INCREASED	90	7	7	53892	83	553241	0.86580	0.40033	1.87249	0.85377	False
BLOOD IMMUNOGLOBULIN M NORMAL	146	18	18	53881	128	553196	1.44365	0.88149	2.36431	0.14468	False
BLOOD INSULIN DECREASED	5	2	2	53897	3	553321	6.84396	1.14358	40.95901	0.06571	False
BLOOD INSULIN INCREASED	5	2	2	53897	3	553321	6.84396	1.14358	40.95901	0.06571	False
BLOOD INSULIN NORMAL	2	1	1	53898	1	553323	10.26594	0.64210	164.13287	0.16965	False
BLOOD IRON	36	7	7	53892	29	553295	2.47799	1.08557	5.65641	0.03660	True
BLOOD IRON DECREASED	90	8	8	53891	82	553242	1.00156	0.48463	2.06986	1.00000	False
BLOOD IRON INCREASED	18	3	3	53896	15	553309	2.05319	0.59441	7.09206	0.21088	False
BLOOD IRON NORMAL	57	8	8	53891	49	553275	1.67607	0.79383	3.53883	0.16258	False
BLOOD KETONE BODY	19	5	5	53894	14	553310	3.66641	1.32064	10.17884	0.02224	True
BLOOD KETONE BODY ABSENT	9	1	1	53898	8	553316	1.28324	0.16050	10.26013	0.56681	False
BLOOD LACTATE DEHYDROGENASE	35	4	4	53895	31	553293	1.32464	0.46760	3.75245	0.54803	False
BLOOD LACTATE DEHYDROGENASE DECREASED	13	1	1	53898	12	553312	0.85550	0.11124	6.57937	1.00000	False
BLOOD LACTATE DEHYDROGENASE INCREASED	538	60	60	53839	478	552846	1.28861	0.98537	1.68517	0.06840	False
BLOOD LACTATE DEHYDROGENASE NORMAL	100	7	7	53892	93	553231	0.77271	0.35844	1.66575	0.72344	False
BLOOD LACTIC ACID	44	10	10	53889	34	553290	3.01939	1.49186	6.11099	0.00449	True
BLOOD LACTIC ACID DECREASED	14	3	3	53896	11	553313	2.79980	0.78111	10.03564	0.12166	False
BLOOD LACTIC ACID INCREASED	97	13	13	53886	84	553240	1.58878	0.88592	2.84925	0.14878	False
BLOOD LACTIC ACID NORMAL	78	8	8	53891	70	553254	1.17325	0.56459	2.43809	0.68811	False
BLOOD LEAD	32	2	2	53897	30	553294	0.68440	0.16356	2.86376	1.00000	False
BLOOD LEAD INCREASED	14	2	2	53897	12	553312	1.71099	0.38294	7.64476	0.35667	False
BLOOD LEAD NORMAL	25	1	1	53898	24	553300	0.42775	0.05787	3.16191	0.72131	False
BLOOD LUTEINISING HORMONE	4	1	1	53898	3	553321	3.42198	0.35595	32.89811	0.31052	False
BLOOD LUTEINISING HORMONE DECREASED	2	1	1	53898	1	553323	10.26594	0.64210	164.13287	0.16965	False
BLOOD LUTEINISING HORMONE INCREASED	11	1	1	53898	10	553314	1.02659	0.13141	8.01964	1.00000	False
BLOOD LUTEINISING HORMONE NORMAL	6	1	1	53898	5	553319	2.05319	0.23987	17.57448	0.42749	False
BLOOD MAGNESIUM	35	7	7	53892	28	553296	2.56649	1.12113	5.87521	0.03184	True
BLOOD MAGNESIUM DECREASED	35	4	4	53895	31	553293	1.32464	0.46760	3.75245	0.54803	False
BLOOD MAGNESIUM INCREASED	35	6	6	53893	29	553295	2.12399	0.88187	5.11565	0.12407	False
BLOOD MAGNESIUM NORMAL	128	21	21	53878	107	553217	2.01481	1.26214	3.21633	0.00719	True
BLOOD MERCURY ABNORMAL	35	1	1	53898	34	553290	0.30194	0.04133	2.20575	0.36585	False
BLOOD OESTROGEN DECREASED	3	2	2	53897	1	553323	20.53188	1.86171	226.43607	0.02224	True
BLOOD OSMOLARITY DECREASED	14	2	2	53897	12	553312	1.71099	0.38294	7.64476	0.35667	False
BLOOD OSMOLARITY INCREASED	7	2	2	53897	5	553319	4.10638	0.79669	21.16547	0.12257	False
BLOOD PARATHYROID HORMONE	3	1	1	53898	2	553322	5.13297	0.46543	56.60902	0.24335	False
BLOOD PARATHYROID HORMONE DECREASED	1	1	1	53898	0	553324	-100.00000	-100.00000	-100.00000	0.08876	False
BLOOD PARATHYROID HORMONE INCREASED	5	2	2	53897	3	553321	6.84396	1.14358	40.95901	0.06571	False
BLOOD PARATHYROID HORMONE NORMAL	13	4	4	53895	9	553315	4.56264	1.40512	14.81562	0.02308	True
BLOOD PH DECREASED	89	8	8	53891	81	553243	1.01392	0.49042	2.09625	0.85356	False
BLOOD PH INCREASED	23	3	3	53896	20	553304	1.53989	0.45760	5.18201	0.45281	False
BLOOD PH NORMAL	108	3	3	53896	105	553219	0.29331	0.09309	0.92414	0.02562	True
BLOOD PHOSPHORUS	28	4	4	53895	24	553300	1.71099	0.59368	4.93107	0.30797	False
BLOOD PHOSPHORUS DECREASED	33	3	3	53896	30	553294	1.02659	0.31331	3.36374	1.00000	False
BLOOD PHOSPHORUS INCREASED	28	5	5	53894	23	553301	2.23173	0.84847	5.87008	0.09734	False
BLOOD PHOSPHORUS NORMAL	96	10	10	53889	86	553238	1.19371	0.62019	2.29759	0.58822	False
BLOOD POTASSIUM	28	8	8	53891	20	553304	4.10638	1.80880	9.32240	0.00236	True
BLOOD POTASSIUM ABNORMAL	2	1	1	53898	1	553323	10.26594	0.64210	164.13287	0.16965	False
BLOOD POTASSIUM DECREASED	217	51	51	53848	166	553158	3.15399	2.30481	4.31605	0.00000	True
BLOOD POTASSIUM INCREASED	155	21	21	53878	134	553190	1.60884	1.01572	2.54831	0.04732	True
BLOOD POTASSIUM NORMAL	436	63	63	53836	373	552951	1.73393	1.32784	2.26419	0.00014	True
BLOOD PRESSURE	376	49	49	53850	327	552997	1.53832	1.13948	2.07676	0.00642	True
BLOOD PRESSURE ABNORMAL	76	14	14	53885	62	553262	2.31812	1.29804	4.13983	0.00747	True
BLOOD PRESSURE DECREASED	1029	109	109	53790	920	552404	1.21629	0.99746	1.48313	0.05483	False
BLOOD PRESSURE DIASTOLIC DECREASED	5	1	1	53898	4	553320	2.56649	0.28685	22.96259	0.37172	False
BLOOD PRESSURE DIASTOLIC INCREASED	5	2	2	53897	3	553321	6.84396	1.14358	40.95901	0.06571	False
BLOOD PRESSURE FLUCTUATION	86	21	21	53878	65	553259	3.31669	2.02805	5.42413	0.00002	True
BLOOD PRESSURE IMMEASURABLE	42	10	10	53889	32	553292	3.20811	1.57721	6.52541	0.00314	True
BLOOD PRESSURE INADEQUATELY CONTROLLED	4	1	1	53898	3	553321	3.42198	0.35595	32.89811	0.31052	False
BLOOD PRESSURE INCREASED	1388	318	318	53581	1070	552254	3.05100	2.69285	3.45679	0.00000	True
BLOOD PRESSURE MEASUREMENT	3	1	1	53898	2	553322	5.13297	0.46543	56.60902	0.24335	False
BLOOD PRESSURE NORMAL	172	17	17	53882	155	553169	1.12594	0.68245	1.85763	0.59237	False
BLOOD PRESSURE ORTHOSTATIC	13	1	1	53898	12	553312	0.85550	0.11124	6.57937	1.00000	False
BLOOD PRESSURE ORTHOSTATIC DECREASED	2	1	1	53898	1	553323	10.26594	0.64210	164.13287	0.16965	False
BLOOD PRESSURE SYSTOLIC DECREASED	24	3	3	53896	21	553303	1.46656	0.43745	4.91665	0.46747	False
BLOOD PRESSURE SYSTOLIC INCREASED	20	2	2	53897	18	553306	1.14066	0.26467	4.91592	0.69643	False
BLOOD PRODUCT TRANSFUSION	253	44	44	53855	209	553115	2.16125	1.56159	2.99118	0.00002	True
BLOOD PROINSULIN DECREASED	1	1	1	53898	0	553324	-100.00000	-100.00000	-100.00000	0.08876	False
BLOOD PROLACTIN	9	1	1	53898	8	553316	1.28324	0.16050	10.26013	0.56681	False
BLOOD PROLACTIN INCREASED	20	3	3	53896	17	553307	1.81164	0.53092	6.18173	0.41551	False
BLOOD PROLACTIN NORMAL	17	2	2	53897	15	553309	1.36879	0.31302	5.98548	0.65898	False
BLOOD SELENIUM	5	1	1	53898	4	553320	2.56649	0.28685	22.96259	0.37172	False
BLOOD SELENIUM DECREASED	4	1	1	53898	3	553321	3.42198	0.35595	32.89811	0.31052	False
BLOOD SMEAR TEST ABNORMAL	19	3	3	53896	16	553308	1.92486	0.56088	6.60590	0.23506	False
BLOOD SMEAR TEST NORMAL	14	2	2	53897	12	553312	1.71099	0.38294	7.64476	0.35667	False
BLOOD SODIUM	14	4	4	53895	10	553314	4.10638	1.28791	13.09275	0.03009	True
BLOOD SODIUM ABNORMAL	5	3	3	53896	2	553322	15.39891	2.57305	92.15778	0.00610	True
BLOOD SODIUM DECREASED	292	61	61	53838	231	553093	2.71092	2.04476	3.59411	0.00000	True
BLOOD SODIUM INCREASED	48	8	8	53891	40	553284	2.05319	0.96112	4.38613	0.07068	False
BLOOD SODIUM NORMAL	481	65	65	53834	416	552908	1.60405	1.23525	2.08297	0.00072	True
BLOOD TEST	3503	667	667	53232	2836	550488	2.41445	2.22019	2.62571	0.00000	True
BLOOD TEST ABNORMAL	474	61	61	53838	413	552911	1.51628	1.15900	1.98369	0.00352	True
BLOOD TEST NORMAL	1910	240	240	53659	1670	551654	1.47534	1.28901	1.68861	0.00000	True
BLOOD TESTOSTERONE DECREASED	25	8	8	53891	17	553307	4.83103	2.08499	11.19376	0.00104	True
BLOOD TESTOSTERONE NORMAL	10	3	3	53896	7	553317	4.39969	1.13773	17.01395	0.05219	False
BLOOD THROMBOPLASTIN DECREASED	22	2	2	53897	20	553304	1.02659	0.23996	4.39204	1.00000	False
BLOOD THROMBOPLASTIN INCREASED	3	1	1	53898	2	553322	5.13297	0.46543	56.60902	0.24335	False
BLOOD THYROID STIMULATING HORMONE	250	52	52	53847	198	553126	2.69611	1.98679	3.65866	0.00000	True
BLOOD THYROID STIMULATING HORMONE ABNORMAL	6	3	3	53896	3	553321	10.26594	2.07202	50.86325	0.01139	True
BLOOD THYROID STIMULATING HORMONE DECREASED	107	24	24	53875	83	553241	2.96847	1.88490	4.67495	0.00002	True
BLOOD THYROID STIMULATING HORMONE INCREASED	60	10	10	53889	50	553274	2.05319	1.04132	4.04831	0.04132	True
BLOOD THYROID STIMULATING HORMONE NORMAL	340	58	58	53841	282	553042	2.11143	1.59188	2.80056	0.00000	True
BLOOD TRIGLYCERIDES	7	1	1	53898	6	553318	1.71099	0.20599	14.21213	0.47830	False
BLOOD TRIGLYCERIDES DECREASED	4	2	2	53897	2	553322	10.26594	1.44607	72.87982	0.04186	True
BLOOD TRIGLYCERIDES INCREASED	61	16	16	53883	45	553279	3.65011	2.06334	6.45715	0.00006	True
BLOOD TRIGLYCERIDES NORMAL	60	9	9	53890	51	553273	1.81164	0.89194	3.67964	0.10759	False
BLOOD UREA	51	8	8	53891	43	553281	1.90994	0.89803	4.06210	0.13128	False
BLOOD UREA ABNORMAL	3	2	2	53897	1	553323	20.53188	1.86171	226.43607	0.02224	True
BLOOD UREA DECREASED	90	14	14	53885	76	553248	1.89109	1.06949	3.34387	0.03839	True
BLOOD UREA INCREASED	346	107	107	53792	239	553085	4.59605	3.65971	5.77194	0.00000	True
BLOOD UREA NITROGEN/CREATININE RATIO	11	3	3	53896	8	553316	3.84973	1.02133	14.51089	0.06715	False
BLOOD UREA NITROGEN/CREATININE RATIO DECREASED	1	1	1	53898	0	553324	-100.00000	-100.00000	-100.00000	0.08876	False
BLOOD UREA NITROGEN/CREATININE RATIO INCREASED	10	2	2	53897	8	553316	2.56649	0.54501	12.08576	0.22074	False
BLOOD UREA NORMAL	451	56	56	53843	395	552929	1.45542	1.10029	1.92519	0.01260	True
BLOOD URIC ACID	28	2	2	53897	26	553298	0.78969	0.18743	3.32710	1.00000	False
BLOOD URIC ACID ABNORMAL	2	1	1	53898	1	553323	10.26594	0.64210	164.13287	0.16965	False
BLOOD URIC ACID DECREASED	14	1	1	53898	13	553311	0.78969	0.10330	6.03666	1.00000	False
BLOOD URIC ACID INCREASED	49	11	11	53888	38	553286	2.97172	1.51912	5.81331	0.00326	True
BLOOD URIC ACID NORMAL	89	14	14	53885	75	553249	1.91631	1.08311	3.39046	0.03696	True
BLOOD URINE	50	7	7	53892	43	553281	1.67120	0.75183	3.71482	0.20801	False
BLOOD URINE ABSENT	33	5	5	53894	28	553296	1.83320	0.70788	4.74747	0.21105	False
BLOOD URINE PRESENT	209	43	43	53856	166	553158	2.65925	1.90176	3.71846	0.00000	True
BLOOD ZINC	8	2	2	53897	6	553318	3.42198	0.69067	16.95442	0.15415	False
BLOOD ZINC DECREASED	7	1	1	53898	6	553318	1.71099	0.20599	14.21213	0.47830	False
BLOOD ZINC NORMAL	5	1	1	53898	4	553320	2.56649	0.28685	22.96259	0.37172	False
BLOODY DISCHARGE	11	3	3	53896	8	553316	3.84973	1.02133	14.51089	0.06715	False
BODY HEIGHT DECREASED	2	2	2	53897	0	553324	-100.00000	-100.00000	-100.00000	0.00788	True
BODY MASS INDEX	9	1	1	53898	8	553316	1.28324	0.16050	10.26013	0.56681	False
BODY MASS INDEX INCREASED	5	1	1	53898	4	553320	2.56649	0.28685	22.96259	0.37172	False
BODY TEMPERATURE	468	88	88	53811	380	552944	2.37738	1.88569	2.99726	0.00000	True
BODY TEMPERATURE DECREASED	370	59	59	53840	311	553013	1.94756	1.47461	2.57220	0.00001	True
BODY TEMPERATURE FLUCTUATION	109	11	11	53888	98	553226	1.15230	0.61790	2.14887	0.61297	False
BODY TEMPERATURE INCREASED	7983	942	942	52957	7041	546283	1.37346	1.28391	1.46925	0.00000	True
BODY TEMPERATURE NORMAL	187	12	12	53887	175	553149	0.70395	0.39225	1.26335	0.30195	False
BONE DENSITOMETRY	20	6	6	53893	14	553310	4.39969	1.69078	11.44869	0.00635	True
BONE DENSITY ABNORMAL	1	1	1	53898	0	553324	-100.00000	-100.00000	-100.00000	0.08876	False
BONE DENSITY DECREASED	8	1	1	53898	7	553317	1.46656	0.18043	11.92016	0.52461	False
BONE DEVELOPMENT ABNORMAL	11	1	1	53898	10	553314	1.02659	0.13141	8.01964	1.00000	False
BONE DISORDER	233	34	34	53865	199	553125	1.75398	1.21930	2.52313	0.00380	True
BONE LOSS	4	2	2	53897	2	553322	10.26594	1.44607	72.87982	0.04186	True
BONE MARROW DEPRESSION	35	2	2	53897	33	553291	0.62218	0.14930	2.59284	0.76621	False
BONE MARROW DISORDER	9	2	2	53897	7	553317	2.93313	0.60933	14.11926	0.18703	False
BONE MARROW FAILURE	16	1	1	53898	15	553309	0.68440	0.09040	5.18123	1.00000	False
BONE MARROW HARVEST	1	1	1	53898	0	553324	-100.00000	-100.00000	-100.00000	0.08876	False
BONE MARROW OEDEMA	21	2	2	53897	19	553305	1.08063	0.25171	4.63929	0.70955	False
BONE MARROW TRANSPLANT	19	2	2	53897	17	553307	1.20776	0.27904	5.22747	0.68352	False
BONE PAIN	738	109	109	53790	629	552695	1.77899	1.45192	2.17974	0.00000	True
BONE SCAN	36	11	11	53888	25	553299	4.51701	2.22276	9.17930	0.00020	True
BONE SCAN ABNORMAL	20	5	5	53894	15	553309	3.42198	1.24373	9.41515	0.02753	True
BONE SCAN NORMAL	36	6	6	53893	30	553294	2.05319	0.85462	4.93271	0.13041	False
BORDETELLA TEST	56	5	5	53894	51	553273	1.00646	0.40171	2.52162	1.00000	False
BORDETELLA TEST POSITIVE	294	2	2	53897	292	553032	0.07031	0.01750	0.28248	0.00000	True
BORRELIA BURGDORFERI SEROLOGY	97	17	17	53882	80	553244	2.18151	1.29259	3.68176	0.00629	True
BORRELIA BURGDORFERI SEROLOGY NEGATIVE	212	28	28	53871	184	553140	1.56221	1.04981	2.32470	0.03867	True
BORRELIA BURGDORFERI SEROLOGY POSITIVE	39	8	8	53891	31	553293	2.64928	1.21785	5.76318	0.01948	True
BORRELIA INFECTION	10	1	1	53898	9	553315	1.14066	0.14451	9.00347	0.60526	False
BORRELIA TEST	173	30	30	53869	143	553181	2.15369	1.45308	3.19211	0.00040	True
BORRELIA TEST NEGATIVE	429	58	58	53841	371	552953	1.60492	1.21709	2.11632	0.00157	True
BORRELIA TEST POSITIVE	46	8	8	53891	38	553286	2.16125	1.00835	4.63234	0.06166	False
BOTTLE FEEDING	3	1	1	53898	2	553322	5.13297	0.46543	56.60902	0.24335	False
BOWEL MOVEMENT IRREGULARITY	95	11	11	53888	84	553240	1.34435	0.71713	2.52014	0.36362	False
BRACHIAL PLEXOPATHY	85	13	13	53886	72	553252	1.85357	1.02689	3.34576	0.05275	False
BRACHIAL PLEXUS INJURY	15	3	3	53896	12	553312	2.56649	0.72426	9.09460	0.14252	False
BRADYCARDIA	1034	101	101	53798	933	552391	1.11132	0.90522	1.36434	0.32427	False
BRADYCARDIA NEONATAL	3	1	1	53898	2	553322	5.13297	0.46543	56.60902	0.24335	False
BRADYPHRENIA	51	14	14	53885	37	553287	3.88441	2.10020	7.18438	0.00010	True
BRADYPNOEA	8	1	1	53898	7	553317	1.46656	0.18043	11.92016	0.52461	False
BRAIN DEATH	34	3	3	53896	31	553293	0.99348	0.30373	3.24957	1.00000	False
BRAIN HERNIATION	13	2	2	53897	11	553313	1.86653	0.41372	8.42094	0.32309	False
BRAIN INJURY	118	6	6	53893	112	553212	0.54996	0.24191	1.25028	0.19275	False
BRAIN MASS	7	2	2	53897	5	553319	4.10638	0.79669	21.16547	0.12257	False
BRAIN NATRIURETIC PEPTIDE	12	6	6	53893	6	553318	10.26594	3.31103	31.82983	0.00028	True
BRAIN NATRIURETIC PEPTIDE DECREASED	1	1	1	53898	0	553324	-100.00000	-100.00000	-100.00000	0.08876	False
BRAIN NATRIURETIC PEPTIDE INCREASED	43	15	15	53884	28	553296	5.49961	2.93762	10.29601	0.00000	True
BRAIN NATRIURETIC PEPTIDE NORMAL	11	2	2	53897	9	553315	2.28132	0.49291	10.55850	0.25487	False
BRAIN NEOPLASM	45	1	1	53898	44	553280	0.23332	0.03215	1.69345	0.18237	False
BRAIN OEDEMA	298	20	20	53879	278	553046	0.73856	0.46920	1.16255	0.22076	False
BRAIN SCAN ABNORMAL	41	5	5	53894	36	553288	1.42583	0.55954	3.63329	0.40812	False
BRAIN SCAN NORMAL	94	15	15	53884	79	553245	1.94923	1.12241	3.38513	0.02678	True
BRAIN STEM AUDITORY EVOKED RESPONSE	17	1	1	53898	16	553308	0.64162	0.08509	4.83821	1.00000	False
BRAIN STEM AUDITORY EVOKED RESPONSE ABNORMAL	29	1	1	53898	28	553296	0.36664	0.04988	2.69474	0.51198	False
BRAIN STEM AUDITORY EVOKED RESPONSE NORMAL	57	7	7	53892	50	553274	1.43723	0.65168	3.16971	0.34831	False
BRAIN STEM INFARCTION	5	1	1	53898	4	553320	2.56649	0.28685	22.96259	0.37172	False
BRAIN STEM ISCHAEMIA	3	1	1	53898	2	553322	5.13297	0.46543	56.60902	0.24335	False
BRAIN STEM SYNDROME	45	6	6	53893	39	553285	1.57938	0.66869	3.73035	0.28852	False
BREAST CALCIFICATIONS	2	1	1	53898	1	553323	10.26594	0.64210	164.13287	0.16965	False
BREAST CANCER	23	5	5	53894	18	553306	2.85165	1.05877	7.68052	0.04792	True
BREAST CANCER FEMALE	19	5	5	53894	14	553310	3.66641	1.32064	10.17884	0.02224	True
BREAST DISCOMFORT	5	3	3	53896	2	553322	15.39891	2.57305	92.15778	0.00610	True
BREAST FEEDING	39	1	1	53898	38	553286	0.27016	0.03709	1.96767	0.25571	False
BREAST INDURATION	4	1	1	53898	3	553321	3.42198	0.35595	32.89811	0.31052	False
BREAST INFLAMMATION	5	2	2	53897	3	553321	6.84396	1.14358	40.95901	0.06571	False
BREAST MASS	31	4	4	53895	27	553297	1.52088	0.53219	4.34636	0.35058	False
BREAST NEOPLASM	10	1	1	53898	9	553315	1.14066	0.14451	9.00347	0.60526	False
BREAST PAIN	295	68	68	53831	227	553097	3.07526	2.34568	4.03175	0.00000	True
BREAST SWELLING	62	14	14	53885	48	553276	2.99423	1.65105	5.43014	0.00091	True
BREAST TENDERNESS	51	7	7	53892	44	553280	1.63322	0.73568	3.62577	0.21542	False
BREATH HOLDING	216	12	12	53887	204	553120	0.60388	0.33739	1.08086	0.09331	False
BREATH ODOUR	33	3	3	53896	30	553294	1.02659	0.31331	3.36374	1.00000	False
BREATH SOUNDS	14	2	2	53897	12	553312	1.71099	0.38294	7.64476	0.35667	False
BREATH SOUNDS ABNORMAL	258	24	24	53875	234	553090	1.05292	0.69181	1.60251	0.82628	False
BREECH DELIVERY	7	5	5	53894	2	553322	25.66485	4.97932	132.28416	0.00010	True
BREECH PRESENTATION	32	4	4	53895	28	553296	1.46656	0.51443	4.18099	0.52547	False
BRONCHIAL DISORDER	20	5	5	53894	15	553309	3.42198	1.24373	9.41515	0.02753	True
BRONCHIAL HYPERREACTIVITY	54	7	7	53892	47	553277	1.52897	0.69114	3.38248	0.33123	False
BRONCHIAL IRRITATION	3	1	1	53898	2	553322	5.13297	0.46543	56.60902	0.24335	False
BRONCHIAL OBSTRUCTION	20	2	2	53897	18	553306	1.14066	0.26467	4.91592	0.69643	False
BRONCHIAL WALL THICKENING	12	6	6	53893	6	553318	10.26594	3.31103	31.82983	0.00028	True
BRONCHIECTASIS	29	12	12	53887	17	553307	7.24655	3.46110	15.17220	0.00000	True
BRONCHIOLITIS	313	25	25	53874	288	553036	0.89114	0.59226	1.34086	0.69040	False
BRONCHITIS	1187	159	159	53740	1028	552296	1.58783	1.34390	1.87603	0.00000	True
BRONCHITIS ACUTE	15	3	3	53896	12	553312	2.56649	0.72426	9.09460	0.14252	False
BRONCHITIS CHRONIC	27	2	2	53897	25	553299	0.82128	0.19453	3.46730	1.00000	False
BRONCHITIS PNEUMOCOCCAL	2	1	1	53898	1	553323	10.26594	0.64210	164.13287	0.16965	False
BRONCHOALVEOLAR LAVAGE ABNORMAL	16	7	7	53892	9	553315	7.98462	2.97371	21.43928	0.00024	True
BRONCHOALVEOLAR LAVAGE NORMAL	6	4	4	53895	2	553322	20.53188	3.76065	112.09713	0.00080	True
BRONCHOPNEUMONIA	108	6	6	53893	102	553222	0.60388	0.26509	1.37566	0.30733	False
BRONCHOPULMONARY ASPERGILLOSIS	3	1	1	53898	2	553322	5.13297	0.46543	56.60902	0.24335	False
BRONCHOPULMONARY DYSPLASIA	3	1	1	53898	2	553322	5.13297	0.46543	56.60902	0.24335	False
BRONCHOSCOPY	26	6	6	53893	20	553304	3.07978	1.23685	7.66870	0.02382	True
BRONCHOSCOPY ABNORMAL	33	8	8	53891	25	553299	3.28510	1.48185	7.28272	0.00707	True
BRONCHOSCOPY NORMAL	15	5	5	53894	10	553314	5.13297	1.75450	15.01702	0.00774	True
BRONCHOSPASM	340	39	39	53860	301	553023	1.33014	0.95298	1.85657	0.10388	False
BRUGADA SYNDROME	1	1	1	53898	0	553324	-100.00000	-100.00000	-100.00000	0.08876	False
BRUXISM	110	9	9	53890	101	553223	0.91479	0.46263	1.80887	1.00000	False
BUCCOGLOSSAL SYNDROME	8	1	1	53898	7	553317	1.46656	0.18043	11.92016	0.52461	False
BULBAR PALSY	11	1	1	53898	10	553314	1.02659	0.13141	8.01964	1.00000	False
BUNDLE BRANCH BLOCK	31	9	9	53890	22	553302	4.19970	1.93387	9.12031	0.00113	True
BUNDLE BRANCH BLOCK LEFT	9	1	1	53898	8	553316	1.28324	0.16050	10.26013	0.56681	False
BUNDLE BRANCH BLOCK RIGHT	35	5	5	53894	30	553294	1.71099	0.66388	4.40967	0.23410	False
BURN OESOPHAGEAL	3	2	2	53897	1	553323	20.53188	1.86171	226.43607	0.02224	True
BURNING FEET SYNDROME	2	1	1	53898	1	553323	10.26594	0.64210	164.13287	0.16965	False
BURNING MOUTH SYNDROME	1	1	1	53898	0	553324	-100.00000	-100.00000	-100.00000	0.08876	False
BURNING SENSATION	2422	535	535	53364	1887	551437	2.91059	2.64524	3.20255	0.00000	True
BURNING SENSATION MUCOSAL	14	1	1	53898	13	553311	0.78969	0.10330	6.03666	1.00000	False
BURNOUT SYNDROME	4	1	1	53898	3	553321	3.42198	0.35595	32.89811	0.31052	False
BURSA DISORDER	16	5	5	53894	11	553313	4.66634	1.62136	13.42989	0.01044	True
BURSA INJURY	22	2	2	53897	20	553304	1.02659	0.23996	4.39204	1.00000	False
BURSA REMOVAL	6	1	1	53898	5	553319	2.05319	0.23987	17.57448	0.42749	False
BURSITIS	563	88	88	53811	475	552849	1.90190	1.51521	2.38727	0.00000	True
BURSITIS INFECTIVE	2	1	1	53898	1	553323	10.26594	0.64210	164.13287	0.16965	False
BUTTERFLY RASH	33	4	4	53895	29	553295	1.41599	0.49781	4.02770	0.53212	False
C-REACTIVE PROTEIN	453	73	73	53826	380	552944	1.97214	1.53543	2.53307	0.00000	True
C-REACTIVE PROTEIN ABNORMAL	11	2	2	53897	9	553315	2.28132	0.49291	10.55850	0.25487	False
C-REACTIVE PROTEIN DECREASED	58	4	4	53895	54	553270	0.76044	0.27542	2.09961	0.81689	False
C-REACTIVE PROTEIN INCREASED	2334	317	317	53582	2017	551307	1.61344	1.43373	1.81567	0.00000	True
C-REACTIVE PROTEIN NORMAL	1145	103	103	53796	1042	552282	1.01477	0.82896	1.24224	0.87599	False
C1 ESTERASE INHIBITOR TEST	8	3	3	53896	5	553319	6.15957	1.47204	25.77385	0.02785	True
CACHEXIA	37	5	5	53894	32	553292	1.60405	0.62503	4.11659	0.37594	False
CAESAREAN SECTION	400	45	45	53854	355	552969	1.30132	0.95443	1.77428	0.09497	False
CALCINOSIS	16	4	4	53895	12	553312	3.42198	1.10368	10.60994	0.04747	True
CALCIUM IONISED DECREASED	13	1	1	53898	12	553312	0.85550	0.11124	6.57937	1.00000	False
CALCIUM IONISED INCREASED	4	1	1	53898	3	553321	3.42198	0.35595	32.89811	0.31052	False
CALCIUM IONISED NORMAL	8	1	1	53898	7	553317	1.46656	0.18043	11.92016	0.52461	False
CALCIUM METABOLISM DISORDER	10	1	1	53898	9	553315	1.14066	0.14451	9.00347	0.60526	False
CALCULUS URETERIC	3	1	1	53898	2	553322	5.13297	0.46543	56.60902	0.24335	False
CAMPYLOBACTER GASTROENTERITIS	7	1	1	53898	6	553318	1.71099	0.20599	14.21213	0.47830	False
CAMPYLOBACTER INFECTION	12	1	1	53898	11	553313	0.93327	0.12049	7.22878	1.00000	False
CAMPYLOBACTER TEST POSITIVE	23	3	3	53896	20	553304	1.53989	0.45760	5.18201	0.45281	False
CANCER SURGERY	5	3	3	53896	2	553322	15.39891	2.57305	92.15778	0.00610	True
CANDIDA INFECTION	19	2	2	53897	17	553307	1.20776	0.27904	5.22747	0.68352	False
CANDIDA TEST POSITIVE	14	1	1	53898	13	553311	0.78969	0.10330	6.03666	1.00000	False
CANDIDIASIS	121	18	18	53881	103	553221	1.79405	1.08745	2.95978	0.03531	True
CAPILLARITIS	5	1	1	53898	4	553320	2.56649	0.28685	22.96259	0.37172	False
CAPILLARY DISORDER	15	1	1	53898	14	553310	0.73328	0.09642	5.57643	1.00000	False
CAPILLARY FRAGILITY	8	1	1	53898	7	553317	1.46656	0.18043	11.92016	0.52461	False
CAPILLARY NAIL REFILL TEST ABNORMAL	21	1	1	53898	20	553304	0.51330	0.06889	3.82471	1.00000	False
CARBOHYDRATE ANTIGEN 125 NORMAL	2	1	1	53898	1	553323	10.26594	0.64210	164.13287	0.16965	False
CARBOHYDRATE ANTIGEN 19-9 INCREASED	2	1	1	53898	1	553323	10.26594	0.64210	164.13287	0.16965	False
CARBON DIOXIDE	12	4	4	53895	8	553316	5.13297	1.54569	17.04577	0.01717	True
CARBON DIOXIDE ABNORMAL	14	2	2	53897	12	553312	1.71099	0.38294	7.64476	0.35667	False
CARBON DIOXIDE DECREASED	117	17	17	53882	100	553224	1.74521	1.04369	2.91827	0.04825	True
CARBON DIOXIDE INCREASED	25	5	5	53894	20	553304	2.56649	0.96327	6.83802	0.06539	False
CARBON DIOXIDE NORMAL	125	25	25	53874	100	553224	2.56649	1.65592	3.97775	0.00010	True
CARCINOEMBRYONIC ANTIGEN INCREASED	5	1	1	53898	4	553320	2.56649	0.28685	22.96259	0.37172	False
CARDIAC ARREST	767	118	118	53781	649	552675	1.86653	1.53439	2.27058	0.00000	True
CARDIAC ASTHMA	1	1	1	53898	0	553324	-100.00000	-100.00000	-100.00000	0.08876	False
CARDIAC DISCOMFORT	4	1	1	53898	3	553321	3.42198	0.35595	32.89811	0.31052	False
CARDIAC DISORDER	240	36	36	53863	204	553120	1.81164	1.27128	2.58168	0.00197	True
CARDIAC ELECTROPHYSIOLOGIC STUDY ABNORMAL	8	1	1	53898	7	553317	1.46656	0.18043	11.92016	0.52461	False
CARDIAC ELECTROPHYSIOLOGIC STUDY NORMAL	14	2	2	53897	12	553312	1.71099	0.38294	7.64476	0.35667	False
CARDIAC ENZYMES	38	9	9	53890	29	553295	3.18598	1.50824	6.73004	0.00516	True
CARDIAC ENZYMES INCREASED	38	4	4	53895	34	553290	1.20776	0.42860	3.40339	0.57695	False
CARDIAC ENZYMES NORMAL	87	21	21	53878	66	553258	3.26644	1.99915	5.33708	0.00002	True
CARDIAC FAILURE	200	41	41	53858	159	553165	2.64719	1.87819	3.73106	0.00000	True
CARDIAC FAILURE ACUTE	14	3	3	53896	11	553313	2.79980	0.78111	10.03564	0.12166	False
CARDIAC FAILURE CONGESTIVE	114	42	42	53857	72	553252	5.98847	4.09343	8.76080	0.00000	True
CARDIAC FIBRILLATION	9	3	3	53896	6	553318	5.13297	1.28375	20.52381	0.03906	True
CARDIAC FLUTTER	58	15	15	53884	43	553281	3.58114	1.98974	6.44537	0.00012	True
CARDIAC FUNCTION TEST	40	12	12	53887	28	553296	4.39969	2.23743	8.65157	0.00012	True
CARDIAC FUNCTION TEST NORMAL	60	14	14	53885	46	553278	3.12442	1.71782	5.68278	0.00064	True
CARDIAC HYPERTROPHY	3	1	1	53898	2	553322	5.13297	0.46543	56.60902	0.24335	False
CARDIAC IMAGING PROCEDURE	9	1	1	53898	8	553316	1.28324	0.16050	10.26013	0.56681	False
CARDIAC MONITORING	136	29	29	53870	107	553217	2.78236	1.84608	4.19350	0.00001	True
CARDIAC MONITORING ABNORMAL	15	1	1	53898	14	553310	0.73328	0.09642	5.57643	1.00000	False
CARDIAC MONITORING NORMAL	45	8	8	53891	37	553287	2.21966	1.03375	4.76606	0.05790	False
CARDIAC MURMUR	105	12	12	53887	93	553231	1.32464	0.72615	2.41639	0.38746	False
CARDIAC OPERATION	11	1	1	53898	10	553314	1.02659	0.13141	8.01964	1.00000	False
CARDIAC PACEMAKER EVALUATION	1	1	1	53898	0	553324	-100.00000	-100.00000	-100.00000	0.08876	False
CARDIAC PACEMAKER INSERTION	36	11	11	53888	25	553299	4.51701	2.22276	9.17930	0.00020	True
CARDIAC PHARMACOLOGIC STRESS TEST	2	1	1	53898	1	553323	10.26594	0.64210	164.13287	0.16965	False
CARDIAC STRESS TEST	106	29	29	53870	77	553247	3.86639	2.52282	5.92551	0.00000	True
CARDIAC STRESS TEST ABNORMAL	13	4	4	53895	9	553315	4.56264	1.40512	14.81562	0.02308	True
CARDIAC STRESS TEST NORMAL	63	11	11	53888	52	553272	2.17164	1.13323	4.16158	0.02484	True
CARDIAC TELEMETRY	6	3	3	53896	3	553321	10.26594	2.07202	50.86325	0.01139	True
CARDIAC TELEMETRY ABNORMAL	3	2	2	53897	1	553323	20.53188	1.86171	226.43607	0.02224	True
CARDIAC TELEMETRY NORMAL	4	3	3	53896	1	553323	30.79783	3.20351	296.08301	0.00261	True
CARDIAC VALVE DISEASE	24	3	3	53896	21	553303	1.46656	0.43745	4.91665	0.46747	False
CARDIAC VALVE SCLEROSIS	1	1	1	53898	0	553324	-100.00000	-100.00000	-100.00000	0.08876	False
CARDIO-RESPIRATORY ARREST	173	24	24	53875	149	553175	1.65357	1.07458	2.54454	0.03090	True
CARDIOACTIVE DRUG LEVEL	2	1	1	53898	1	553323	10.26594	0.64210	164.13287	0.16965	False
CARDIOACTIVE DRUG LEVEL DECREASED	2	2	2	53897	0	553324	-100.00000	-100.00000	-100.00000	0.00788	True
CARDIOLIPIN ANTIBODY NEGATIVE	71	6	6	53893	65	553259	0.94763	0.41064	2.18680	1.00000	False
CARDIOLIPIN ANTIBODY POSITIVE	23	2	2	53897	21	553303	0.97771	0.22925	4.16974	1.00000	False
CARDIOMEGALY	129	31	31	53868	98	553226	3.24739	2.16856	4.86292	0.00000	True
CARDIOMYOPATHY	155	21	21	53878	134	553190	1.60884	1.01572	2.54831	0.04732	True
CARDIOPULMONARY FAILURE	23	3	3	53896	20	553304	1.53989	0.45760	5.18201	0.45281	False
CARDIOVASCULAR DISORDER	346	42	42	53857	304	553020	1.41832	1.02731	1.95816	0.03725	True
CARDIOVASCULAR EVALUATION	42	4	4	53895	38	553286	1.08063	0.38569	3.02766	0.78607	False
CARDIOVASCULAR EXAMINATION	15	2	2	53897	13	553311	1.57938	0.35641	6.99874	0.38961	False
CARDIOVASCULAR FUNCTION TEST NORMAL	6	1	1	53898	5	553319	2.05319	0.23987	17.57448	0.42749	False
CARDIOVERSION	33	5	5	53894	28	553296	1.83320	0.70788	4.74747	0.21105	False
CARNITINE DECREASED	4	1	1	53898	3	553321	3.42198	0.35595	32.89811	0.31052	False
CAROTID ARTERY ANEURYSM	1	1	1	53898	0	553324	-100.00000	-100.00000	-100.00000	0.08876	False
CAROTID ARTERY DISSECTION	3	2	2	53897	1	553323	20.53188	1.86171	226.43607	0.02224	True
CAROTID ARTERY OCCLUSION	6	2	2	53897	4	553320	5.13297	0.94016	28.02428	0.09287	False
CAROTID ARTERY STENOSIS	8	5	5	53894	3	553321	17.10990	4.08901	71.59403	0.00025	True
CAROTID ARTERY THROMBOSIS	1	1	1	53898	0	553324	-100.00000	-100.00000	-100.00000	0.08876	False
CAROTID SINUS MASSAGE	1	1	1	53898	0	553324	-100.00000	-100.00000	-100.00000	0.08876	False
CARPAL TUNNEL DECOMPRESSION	6	1	1	53898	5	553319	2.05319	0.23987	17.57448	0.42749	False
CARPAL TUNNEL SYNDROME	129	28	28	53871	101	553223	2.84600	1.87273	4.32509	0.00001	True
CARTILAGE DEVELOPMENT DISORDER	3	1	1	53898	2	553322	5.13297	0.46543	56.60902	0.24335	False
CAST APPLICATION	12	3	3	53896	9	553315	3.42198	0.92643	12.63987	0.08381	False
CATAPLEXY	101	8	8	53891	93	553231	0.88309	0.42894	1.81807	0.86196	False
CATARACT	42	4	4	53895	38	553286	1.08063	0.38569	3.02766	0.78607	False
CATARACT NUCLEAR	1	1	1	53898	0	553324	-100.00000	-100.00000	-100.00000	0.08876	False
CATARACT OPERATION	12	3	3	53896	9	553315	3.42198	0.92643	12.63987	0.08381	False
CATARACT SUBCAPSULAR	1	1	1	53898	0	553324	-100.00000	-100.00000	-100.00000	0.08876	False
CATATONIA	45	4	4	53895	41	553283	1.00156	0.35876	2.79605	1.00000	False
CATECHOLAMINES URINE	1	1	1	53898	0	553324	-100.00000	-100.00000	-100.00000	0.08876	False
CATHETER PLACEMENT	52	8	8	53891	44	553280	1.86653	0.87880	3.96444	0.13489	False
CATHETER SITE ERYTHEMA	1	1	1	53898	0	553324	-100.00000	-100.00000	-100.00000	0.08876	False
CATHETERISATION CARDIAC	47	14	14	53885	33	553291	4.35525	2.33099	8.13738	0.00004	True
CATHETERISATION CARDIAC ABNORMAL	30	9	9	53890	21	553303	4.39969	2.01517	9.60579	0.00087	True
CATHETERISATION CARDIAC NORMAL	41	11	11	53888	30	553294	3.76418	1.88650	7.51074	0.00069	True
CAUTERY TO NOSE	1	1	1	53898	0	553324	-100.00000	-100.00000	-100.00000	0.08876	False
CD4 LYMPHOCYTES	32	13	13	53886	19	553305	7.02407	3.46919	14.22162	0.00000	True
CD4 LYMPHOCYTES ABNORMAL	3	1	1	53898	2	553322	5.13297	0.46543	56.60902	0.24335	False
CD4 LYMPHOCYTES DECREASED	60	12	12	53887	48	553276	2.56649	1.36344	4.83105	0.00967	True
CD4 LYMPHOCYTES INCREASED	22	2	2	53897	20	553304	1.02659	0.23996	4.39204	1.00000	False
CD4 LYMPHOCYTES NORMAL	11	1	1	53898	10	553314	1.02659	0.13141	8.01964	1.00000	False
CD4/CD8 RATIO	12	1	1	53898	11	553313	0.93327	0.12049	7.22878	1.00000	False
CD8 LYMPHOCYTES	24	2	2	53897	22	553302	0.93327	0.21946	3.96881	1.00000	False
CD8 LYMPHOCYTES DECREASED	25	4	4	53895	21	553303	1.95542	0.67124	5.69640	0.27478	False
CD8 LYMPHOCYTES INCREASED	8	1	1	53898	7	553317	1.46656	0.18043	11.92016	0.52461	False
CELL DEATH	13	1	1	53898	12	553312	0.85550	0.11124	6.57937	1.00000	False
CELL MARKER	11	5	5	53894	6	553318	8.55495	2.61092	28.03115	0.00161	True
CELL MARKER DECREASED	1	1	1	53898	0	553324	-100.00000	-100.00000	-100.00000	0.08876	False
CELL MARKER INCREASED	5	1	1	53898	4	553320	2.56649	0.28685	22.96259	0.37172	False
CELLS IN URINE	3	1	1	53898	2	553322	5.13297	0.46543	56.60902	0.24335	False
CELLULITIS	10590	1476	1476	52423	9114	544210	1.66256	1.57472	1.75529	0.00000	True
CELLULITIS STREPTOCOCCAL	2	1	1	53898	1	553323	10.26594	0.64210	164.13287	0.16965	False
CENTRAL AUDITORY PROCESSING DISORDER	5	1	1	53898	4	553320	2.56649	0.28685	22.96259	0.37172	False
CENTRAL NERVOUS SYSTEM INFECTION	12	2	2	53897	10	553314	2.05319	0.44987	9.37060	0.28908	False
CENTRAL NERVOUS SYSTEM INFLAMMATION	78	5	5	53894	73	553251	0.70315	0.28416	1.73990	0.55316	False
CENTRAL NERVOUS SYSTEM LESION	212	17	17	53882	195	553129	0.89498	0.54524	1.46906	0.80864	False
CENTRAL NERVOUS SYSTEM LEUKAEMIA	1	1	1	53898	0	553324	-100.00000	-100.00000	-100.00000	0.08876	False
CENTRAL NERVOUS SYSTEM NEOPLASM	23	2	2	53897	21	553303	0.97771	0.22925	4.16974	1.00000	False
CENTRAL VENOUS CATHETERISATION	33	6	6	53893	27	553297	2.28132	0.94194	5.52525	0.06764	False
CEPHALHAEMATOMA	6	1	1	53898	5	553319	2.05319	0.23987	17.57448	0.42749	False
CEREBELLAR ATAXIA	155	9	9	53890	146	553178	0.63283	0.32282	1.24056	0.20438	False
CEREBELLAR ATROPHY	6	2	2	53897	4	553320	5.13297	0.94016	28.02428	0.09287	False
CEREBELLAR INFARCTION	8	2	2	53897	6	553318	3.42198	0.69067	16.95442	0.15415	False
CEREBELLAR SYNDROME	145	12	12	53887	133	553191	0.92625	0.51308	1.67213	1.00000	False
CEREBRAL ATROPHY	51	7	7	53892	44	553280	1.63322	0.73568	3.62577	0.21542	False
CEREBRAL CYST	10	1	1	53898	9	553315	1.14066	0.14451	9.00347	0.60526	False
CEREBRAL DISORDER	52	2	2	53897	50	553274	0.41064	0.09992	1.68759	0.32362	False
CEREBRAL HAEMATOMA	7	1	1	53898	6	553318	1.71099	0.20599	14.21213	0.47830	False
CEREBRAL HAEMORRHAGE	133	11	11	53888	122	553202	0.92562	0.49944	1.71544	1.00000	False
CEREBRAL INFARCTION	106	11	11	53888	95	553229	1.18869	0.63678	2.21893	0.60618	False
CEREBRAL ISCHAEMIA	87	16	16	53883	71	553253	2.31345	1.34501	3.97919	0.00423	True
CEREBRAL PALSY	53	2	2	53897	51	553273	0.40259	0.09801	1.65362	0.32702	False
CEREBRAL SMALL VESSEL ISCHAEMIC DISEASE	16	1	1	53898	15	553309	0.68440	0.09040	5.18123	1.00000	False
CEREBRAL THROMBOSIS	9	3	3	53896	6	553318	5.13297	1.28375	20.52381	0.03906	True
CEREBRAL VENTRICLE DILATATION	24	2	2	53897	22	553302	0.93327	0.21946	3.96881	1.00000	False
CEREBROVASCULAR ACCIDENT	446	78	78	53821	368	552956	2.17593	1.70455	2.77767	0.00000	True
CEREBROVASCULAR DISORDER	57	8	8	53891	49	553275	1.67607	0.79383	3.53883	0.16258	False
CERULOPLASMIN	7	1	1	53898	6	553318	1.71099	0.20599	14.21213	0.47830	False
CERULOPLASMIN NORMAL	7	1	1	53898	6	553318	1.71099	0.20599	14.21213	0.47830	False
CERUMEN IMPACTION	10	2	2	53897	8	553316	2.56649	0.54501	12.08576	0.22074	False
CERVICAL DYSPLASIA	287	2	2	53897	285	553039	0.07204	0.01793	0.28946	0.00000	True
CERVICAL INCOMPETENCE	7	1	1	53898	6	553318	1.71099	0.20599	14.21213	0.47830	False
CERVICAL MYELOPATHY	11	1	1	53898	10	553314	1.02659	0.13141	8.01964	1.00000	False
CERVICAL SPINAL STENOSIS	16	3	3	53896	13	553311	2.36906	0.67511	8.31340	0.16445	False
CERVICOBRACHIAL SYNDROME	15	2	2	53897	13	553311	1.57938	0.35641	6.99874	0.38961	False
CERVICOGENIC HEADACHE	2	1	1	53898	1	553323	10.26594	0.64210	164.13287	0.16965	False
CERVIX DISORDER	29	2	2	53897	27	553297	0.76044	0.18083	3.19778	1.00000	False
CHANGE OF BOWEL HABIT	23	6	6	53893	17	553307	3.62327	1.42860	9.18947	0.01313	True
CHAPPED LIPS	70	10	10	53889	60	553264	1.71099	0.87605	3.34171	0.13537	False
CHEDIAK-HIGASHI SYNDROME	1	1	1	53898	0	553324	-100.00000	-100.00000	-100.00000	0.08876	False
CHEILITIS	169	19	19	53880	150	553174	1.30035	0.80689	2.09560	0.27788	False
CHELATION THERAPY	8	1	1	53898	7	553317	1.46656	0.18043	11.92016	0.52461	False
CHEMICAL BURNS OF EYE	1	1	1	53898	0	553324	-100.00000	-100.00000	-100.00000	0.08876	False
CHEMICAL POISONING	2	1	1	53898	1	553323	10.26594	0.64210	164.13287	0.16965	False
CHEMOTHERAPY	137	9	9	53890	128	553196	0.72182	0.36721	1.41890	0.45084	False
CHEST CRUSHING	3	1	1	53898	2	553322	5.13297	0.46543	56.60902	0.24335	False
CHEST DISCOMFORT	3546	644	644	53255	2902	550422	2.27818	2.09271	2.48008	0.00000	True
CHEST PAIN	6070	882	882	53017	5188	548136	1.74529	1.62594	1.87340	0.00000	True
CHEST SCAN	5	1	1	53898	4	553320	2.56649	0.28685	22.96259	0.37172	False
CHEST TUBE INSERTION	9	1	1	53898	8	553316	1.28324	0.16050	10.26013	0.56681	False
CHEST X-RAY	1224	282	282	53617	942	552382	3.07324	2.69119	3.50954	0.00000	True
CHEST X-RAY ABNORMAL	815	148	148	53751	667	552657	2.27790	1.90672	2.72134	0.00000	True
CHEST X-RAY NORMAL	1729	274	274	53625	1455	551869	1.93324	1.69966	2.19893	0.00000	True
CHILD-PUGH-TURCOTTE SCORE INCREASED	1	1	1	53898	0	553324	-100.00000	-100.00000	-100.00000	0.08876	False
CHILD MALTREATMENT SYNDROME	26	1	1	53898	25	553299	0.41064	0.05564	3.03057	0.72489	False
CHILDHOOD DISINTEGRATIVE DISORDER	135	1	1	53898	134	553190	0.07661	0.01071	0.54786	0.00010	True
CHILLS	19150	3635	3635	50264	15515	537809	2.40520	2.32243	2.49092	0.00000	True
CHLAMYDIA IDENTIFICATION TEST	2	1	1	53898	1	553323	10.26594	0.64210	164.13287	0.16965	False
CHLAMYDIA IDENTIFICATION TEST NEGATIVE	18	2	2	53897	16	553308	1.28324	0.29506	5.58098	0.67097	False
CHLAMYDIA IDENTIFICATION TEST POSITIVE	2	1	1	53898	1	553323	10.26594	0.64210	164.13287	0.16965	False
CHLAMYDIA SEROLOGY	7	1	1	53898	6	553318	1.71099	0.20599	14.21213	0.47830	False
CHLAMYDIA SEROLOGY POSITIVE	5	1	1	53898	4	553320	2.56649	0.28685	22.96259	0.37172	False
CHLAMYDIA TEST	17	1	1	53898	16	553308	0.64162	0.08509	4.83821	1.00000	False
CHLAMYDIA TEST NEGATIVE	58	9	9	53890	49	553275	1.88558	0.92634	3.83813	0.09908	False
CHLAMYDIA TEST POSITIVE	22	4	4	53895	18	553306	2.28132	0.77210	6.74060	0.12557	False
CHLAMYDIAL INFECTION	33	2	2	53897	31	553293	0.66232	0.15851	2.76738	0.76529	False
CHOKING	390	38	38	53861	352	552972	1.10826	0.79313	1.54859	0.53275	False
CHOKING SENSATION	66	11	11	53888	55	553269	2.05319	1.07475	3.92239	0.04616	True
CHOLANGIOGRAM	4	1	1	53898	3	553321	3.42198	0.35595	32.89811	0.31052	False
CHOLANGIOGRAM NORMAL	4	1	1	53898	3	553321	3.42198	0.35595	32.89811	0.31052	False
CHOLANGITIS	12	5	5	53894	7	553317	7.33282	2.32736	23.10350	0.00256	True
CHOLANGITIS SCLEROSING	9	1	1	53898	8	553316	1.28324	0.16050	10.26013	0.56681	False
CHOLECYSTECTOMY	46	7	7	53892	39	553285	1.84260	0.82422	4.11930	0.12357	False
CHOLECYSTITIS	58	7	7	53892	51	553273	1.40905	0.63951	3.10459	0.35534	False
CHOLELITHIASIS	71	16	16	53883	55	553269	2.98646	1.71160	5.21087	0.00041	True
CHOLESTASIS	29	4	4	53895	25	553299	1.64255	0.57166	4.71951	0.32130	False
CHOLURIA	6	1	1	53898	5	553319	2.05319	0.23987	17.57448	0.42749	False
CHONDROCALCINOSIS PYROPHOSPHATE	4	1	1	53898	3	553321	3.42198	0.35595	32.89811	0.31052	False
CHONDROPATHY	11	3	3	53896	8	553316	3.84973	1.02133	14.51089	0.06715	False
CHONDROSARCOMA	1	1	1	53898	0	553324	-100.00000	-100.00000	-100.00000	0.08876	False
CHORDEE	1	1	1	53898	0	553324	-100.00000	-100.00000	-100.00000	0.08876	False
CHOREA	23	2	2	53897	21	553303	0.97771	0.22925	4.16974	1.00000	False
CHORIORETINOPATHY	1	1	1	53898	0	553324	-100.00000	-100.00000	-100.00000	0.08876	False
CHOROIDAL EFFUSION	3	1	1	53898	2	553322	5.13297	0.46543	56.60902	0.24335	False
CHROMATOPSIA	33	2	2	53897	31	553293	0.66232	0.15851	2.76738	0.76529	False
CHROMATURIA	235	40	40	53859	195	553129	2.10583	1.49873	2.95886	0.00007	True
CHROMOSOMAL ANALYSIS	10	1	1	53898	9	553315	1.14066	0.14451	9.00347	0.60526	False
CHRONIC FATIGUE SYNDROME	208	20	20	53879	188	553136	1.09212	0.68881	1.73157	0.71374	False
CHRONIC GRAFT VERSUS HOST DISEASE	2	1	1	53898	1	553323	10.26594	0.64210	164.13287	0.16965	False
CHRONIC HEPATITIS	2	1	1	53898	1	553323	10.26594	0.64210	164.13287	0.16965	False
CHRONIC HEPATITIS B	49	2	2	53897	47	553277	0.43685	0.10611	1.79843	0.31868	False
CHRONIC INFLAMMATORY DEMYELINATING POLYRADICULONEUROPATHY	105	19	19	53880	86	553238	2.26806	1.38010	3.72734	0.00280	True
CHRONIC KIDNEY DISEASE	6	3	3	53896	3	553321	10.26594	2.07202	50.86325	0.01139	True
CHRONIC MYELOID LEUKAEMIA	8	1	1	53898	7	553317	1.46656	0.18043	11.92016	0.52461	False
CHRONIC OBSTRUCTIVE PULMONARY DISEASE	114	40	40	53859	74	553250	5.54916	3.77764	8.15142	0.00000	True
CHRONIC SINUSITIS	28	7	7	53892	21	553303	3.42198	1.45477	8.04932	0.00966	True
CHRONIC SPONTANEOUS URTICARIA	5	2	2	53897	3	553321	6.84396	1.14358	40.95901	0.06571	False
CHRONIC THROAT CLEARING	7	2	2	53897	5	553319	4.10638	0.79669	21.16547	0.12257	False
CHYLOTHORAX	3	1	1	53898	2	553322	5.13297	0.46543	56.60902	0.24335	False
CIRCADIAN RHYTHM SLEEP DISORDER	14	1	1	53898	13	553311	0.78969	0.10330	6.03666	1.00000	False
CIRCULATING ANTICOAGULANT POSITIVE	2	1	1	53898	1	553323	10.26594	0.64210	164.13287	0.16965	False
CIRCULATORY COLLAPSE	314	25	25	53874	289	553035	0.88806	0.59024	1.33615	0.69080	False
CIRCUMORAL OEDEMA	9	2	2	53897	7	553317	2.93313	0.60933	14.11926	0.18703	False
CIRCUMSTANCE OR INFORMATION CAPABLE OF LEADING TO MEDICATION ERROR	86	2	2	53897	84	553240	0.24443	0.06014	0.99349	0.03391	True
CLAUDICATION OF JAW MUSCLES	1	1	1	53898	0	553324	-100.00000	-100.00000	-100.00000	0.08876	False
CLINICALLY ISOLATED SYNDROME	9	1	1	53898	8	553316	1.28324	0.16050	10.26013	0.56681	False
CLONIC CONVULSION	66	5	5	53894	61	553263	0.84147	0.33813	2.09407	1.00000	False
CLONUS	173	7	7	53892	166	553158	0.43290	0.20322	0.92217	0.02227	True
CLOSTRIDIAL INFECTION	23	4	4	53895	19	553305	2.16125	0.73527	6.35273	0.14192	False
CLOSTRIDIUM COLITIS	4	1	1	53898	3	553321	3.42198	0.35595	32.89811	0.31052	False
CLOSTRIDIUM DIFFICILE COLITIS	17	3	3	53896	14	553310	2.19984	0.63220	7.65474	0.18729	False
CLOSTRIDIUM DIFFICILE TOXIN TEST POSITIVE	3	1	1	53898	2	553322	5.13297	0.46543	56.60902	0.24335	False
CLOSTRIDIUM TEST	31	4	4	53895	27	553297	1.52088	0.53219	4.34636	0.35058	False
CLOSTRIDIUM TEST NEGATIVE	60	8	8	53891	52	553272	1.57938	0.75030	3.32457	0.24959	False
CLOSTRIDIUM TEST POSITIVE	42	5	5	53894	37	553287	1.38729	0.54526	3.52965	0.41818	False
CLOT RETRACTION	1	1	1	53898	0	553324	-100.00000	-100.00000	-100.00000	0.08876	False
CLUMSINESS	180	13	13	53886	167	553157	0.79915	0.45452	1.40507	0.51272	False
CLUSTER HEADACHE	17	3	3	53896	14	553310	2.19984	0.63220	7.65474	0.18729	False
CNS VENTRICULITIS	1	1	1	53898	0	553324	-100.00000	-100.00000	-100.00000	0.08876	False
COAGULATION FACTOR DECREASED	7	1	1	53898	6	553318	1.71099	0.20599	14.21213	0.47830	False
COAGULATION FACTOR V LEVEL NORMAL	8	1	1	53898	7	553317	1.46656	0.18043	11.92016	0.52461	False
COAGULATION TEST	17	1	1	53898	16	553308	0.64162	0.08509	4.83821	1.00000	False
COAGULATION TEST NORMAL	155	15	15	53884	140	553184	1.09992	0.64586	1.87322	0.67217	False
COAGULATION TIME	4	2	2	53897	2	553322	10.26594	1.44607	72.87982	0.04186	True
COAGULATION TIME PROLONGED	23	5	5	53894	18	553306	2.85165	1.05877	7.68052	0.04792	True
COAGULATION TIME SHORTENED	10	2	2	53897	8	553316	2.56649	0.54501	12.08576	0.22074	False
COAGULOPATHY	137	12	12	53887	125	553199	0.98553	0.54507	1.78193	1.00000	False
COCHLEA IMPLANT	17	1	1	53898	16	553308	0.64162	0.08509	4.83821	1.00000	False
COELIAC DISEASE	66	4	4	53895	62	553262	0.66232	0.24097	1.82043	0.66209	False
COGNITIVE DISORDER	854	79	79	53820	775	552549	1.04646	0.83036	1.31881	0.67361	False
COLD AGGLUTININS	5	1	1	53898	4	553320	2.56649	0.28685	22.96259	0.37172	False
COLD AGGLUTININS NEGATIVE	9	3	3	53896	6	553318	5.13297	1.28375	20.52381	0.03906	True
COLD COMPRESS THERAPY	240	27	27	53872	213	553111	1.30132	0.87204	1.94192	0.21017	False
COLD SWEAT	1819	198	198	53701	1621	551703	1.25395	1.08222	1.45294	0.00334	True
COLD TYPE HAEMOLYTIC ANAEMIA	2	1	1	53898	1	553323	10.26594	0.64210	164.13287	0.16965	False
COLD URTICARIA	6	2	2	53897	4	553320	5.13297	0.94016	28.02428	0.09287	False
COLECTOMY	30	5	5	53894	25	553299	2.05319	0.78603	5.36316	0.18378	False
COLECTOMY TOTAL	7	1	1	53898	6	553318	1.71099	0.20599	14.21213	0.47830	False
COLITIS	195	25	25	53874	170	553154	1.50970	0.99220	2.29711	0.05840	False
COLITIS MICROSCOPIC	5	2	2	53897	3	553321	6.84396	1.14358	40.95901	0.06571	False
COLITIS ULCERATIVE	121	19	19	53880	102	553222	1.91228	1.17191	3.12041	0.01496	True
COLLAGEN DISORDER	43	2	2	53897	41	553283	0.50078	0.12113	2.07033	0.58631	False
COLLAPSE OF LUNG	18	5	5	53894	13	553311	3.94844	1.40767	11.07514	0.01765	True
COLON CANCER	6	2	2	53897	4	553320	5.13297	0.94016	28.02428	0.09287	False
COLONIC FISTULA	1	1	1	53898	0	553324	-100.00000	-100.00000	-100.00000	0.08876	False
COLONIC HAEMORRHAGE	2	1	1	53898	1	553323	10.26594	0.64210	164.13287	0.16965	False
COLONOSCOPY	88	14	14	53885	74	553250	1.94221	1.09708	3.43836	0.03574	True
COLONOSCOPY ABNORMAL	70	10	10	53889	60	553264	1.71099	0.87605	3.34171	0.13537	False
COLONOSCOPY NORMAL	59	11	11	53888	48	553276	2.35261	1.22189	4.52969	0.01797	True
COLONY STIMULATING FACTOR THERAPY	1	1	1	53898	0	553324	-100.00000	-100.00000	-100.00000	0.08876	False
COLOUR BLINDNESS	11	3	3	53896	8	553316	3.84973	1.02133	14.51089	0.06715	False
COLOUR BLINDNESS ACQUIRED	17	3	3	53896	14	553310	2.19984	0.63220	7.65474	0.18729	False
COLOUR VISION TESTS ABNORMAL	5	2	2	53897	3	553321	6.84396	1.14358	40.95901	0.06571	False
COLOUR VISION TESTS NORMAL	7	2	2	53897	5	553319	4.10638	0.79669	21.16547	0.12257	False
COLPOSCOPY	64	3	3	53896	61	553263	0.50488	0.15842	1.60904	0.37439	False
COMA	1278	93	93	53806	1185	552139	0.80568	0.65250	0.99483	0.04349	True
COMA SCALE	23	6	6	53893	17	553307	3.62327	1.42860	9.18947	0.01313	True
COMMUNICATION DISORDER	94	4	4	53895	90	553234	0.45626	0.16760	1.24212	0.14441	False
COMPARTMENT SYNDROME	15	5	5	53894	10	553314	5.13297	1.75450	15.01702	0.00774	True
COMPLEMENT FACTOR	24	5	5	53894	19	553305	2.70156	1.00876	7.23504	0.05626	False
COMPLEMENT FACTOR ABNORMAL	12	3	3	53896	9	553315	3.42198	0.92643	12.63987	0.08381	False
COMPLEMENT FACTOR C1 INCREASED	2	1	1	53898	1	553323	10.26594	0.64210	164.13287	0.16965	False
COMPLEMENT FACTOR C3	166	25	25	53874	141	553183	1.82020	1.18970	2.78484	0.00884	True
COMPLEMENT FACTOR C3 DECREASED	26	6	6	53893	20	553304	3.07978	1.23685	7.66870	0.02382	True
COMPLEMENT FACTOR C3 INCREASED	31	4	4	53895	27	553297	1.52088	0.53219	4.34636	0.35058	False
COMPLEMENT FACTOR C4	148	25	25	53874	123	553201	2.08657	1.35746	3.20730	0.00199	True
COMPLEMENT FACTOR C4 DECREASED	44	6	6	53893	38	553286	1.62094	0.68525	3.83429	0.28073	False
COMPLEMENT FACTOR DECREASED	23	3	3	53896	20	553304	1.53989	0.45760	5.18201	0.45281	False
COMPLEMENT FACTOR INCREASED	13	4	4	53895	9	553315	4.56264	1.40512	14.81562	0.02308	True
COMPLEMENT FACTOR NORMAL	124	19	19	53880	105	553219	1.85765	1.13968	3.02793	0.01705	True
COMPLEX PARTIAL SEIZURES	64	6	6	53893	58	553266	1.06199	0.45825	2.46117	0.82556	False
COMPLEX REGIONAL PAIN SYNDROME	114	7	7	53892	107	553217	0.67160	0.31264	1.44271	0.40828	False
COMPLICATION ASSOCIATED WITH DEVICE	2	1	1	53898	1	553323	10.26594	0.64210	164.13287	0.16965	False
COMPLICATION OF DELIVERY	15	1	1	53898	14	553310	0.73328	0.09642	5.57643	1.00000	False
COMPLICATION OF PREGNANCY	48	11	11	53888	37	553287	3.05204	1.55701	5.98257	0.00275	True
COMPRESSION FRACTURE	5	1	1	53898	4	553320	2.56649	0.28685	22.96259	0.37172	False
COMPULSIONS	3	1	1	53898	2	553322	5.13297	0.46543	56.60902	0.24335	False
COMPUTERISED TOMOGRAM	1534	297	297	53602	1237	552087	2.46482	2.17228	2.79676	0.00000	True
COMPUTERISED TOMOGRAM ABDOMEN	64	15	15	53884	49	553275	3.14264	1.76255	5.60332	0.00039	True
COMPUTERISED TOMOGRAM ABDOMEN ABNORMAL	110	31	31	53868	79	553245	4.02841	2.65933	6.10232	0.00000	True
COMPUTERISED TOMOGRAM ABDOMEN NORMAL	72	20	20	53879	52	553272	3.94844	2.35770	6.61245	0.00000	True
COMPUTERISED TOMOGRAM ABNORMAL	572	101	101	53798	471	552853	2.20140	1.77598	2.72873	0.00000	True
COMPUTERISED TOMOGRAM HEAD	680	128	128	53771	552	552772	2.38051	1.96450	2.88461	0.00000	True
COMPUTERISED TOMOGRAM HEAD ABNORMAL	125	14	14	53885	111	553213	1.29480	0.74270	2.25731	0.34449	False
COMPUTERISED TOMOGRAM HEAD NORMAL	497	81	81	53818	416	552908	1.99890	1.57574	2.53570	0.00000	True
COMPUTERISED TOMOGRAM INTESTINE	2	1	1	53898	1	553323	10.26594	0.64210	164.13287	0.16965	False
COMPUTERISED TOMOGRAM KIDNEY ABNORMAL	3	2	2	53897	1	553323	20.53188	1.86171	226.43607	0.02224	True
COMPUTERISED TOMOGRAM LIVER ABNORMAL	2	1	1	53898	1	553323	10.26594	0.64210	164.13287	0.16965	False
COMPUTERISED TOMOGRAM NORMAL	1918	259	259	53640	1659	551665	1.60270	1.40641	1.82639	0.00000	True
COMPUTERISED TOMOGRAM PELVIS	34	12	12	53887	22	553302	5.59960	2.77144	11.31383	0.00002	True
COMPUTERISED TOMOGRAM THORAX	50	19	19	53880	31	553293	6.29203	3.55477	11.13705	0.00000	True
COMPUTERISED TOMOGRAM THORAX ABNORMAL	123	37	37	53862	86	553238	4.41674	3.00462	6.49254	0.00000	True
COMPUTERISED TOMOGRAM THORAX NORMAL	60	18	18	53881	42	553282	4.39969	2.53308	7.64178	0.00000	True
CONCOMITANT DISEASE PROGRESSION	3	1	1	53898	2	553322	5.13297	0.46543	56.60902	0.24335	False
CONCUSSION	124	6	6	53893	118	553206	0.52200	0.22986	1.18544	0.15217	False
CONDITION AGGRAVATED	5796	1140	1140	52759	4656	548668	2.51357	2.35736	2.68013	0.00000	True
CONDUCTIVE DEAFNESS	4	1	1	53898	3	553321	3.42198	0.35595	32.89811	0.31052	False
CONFUSIONAL AROUSAL	2	1	1	53898	1	553323	10.26594	0.64210	164.13287	0.16965	False
CONFUSIONAL STATE	2046	338	338	53561	1708	551616	2.03155	1.80842	2.28221	0.00000	True
CONGENITAL ANOMALY	208	19	19	53880	189	553135	1.03203	0.64397	1.65393	0.90268	False
CONGENITAL CENTRAL NERVOUS SYSTEM ANOMALY	36	1	1	53898	35	553289	0.29331	0.04018	2.14099	0.37032	False
CONGENITAL CYST	1	1	1	53898	0	553324	-100.00000	-100.00000	-100.00000	0.08876	False
CONGENITAL CYSTIC KIDNEY DISEASE	8	2	2	53897	6	553318	3.42198	0.69067	16.95442	0.15415	False
CONGENITAL GENITOURINARY ABNORMALITY	4	1	1	53898	3	553321	3.42198	0.35595	32.89811	0.31052	False
CONGENITAL HYDRONEPHROSIS	1	1	1	53898	0	553324	-100.00000	-100.00000	-100.00000	0.08876	False
CONGENITAL HYPOTHYROIDISM	1	1	1	53898	0	553324	-100.00000	-100.00000	-100.00000	0.08876	False
CONGENITAL JOINT MALFORMATION	4	3	3	53896	1	553323	30.79783	3.20351	296.08301	0.00261	True
CONGENITAL MUSCULOSKELETAL ANOMALY	22	3	3	53896	19	553305	1.62094	0.47968	5.47747	0.43912	False
CONGENITAL NAEVUS	9	1	1	53898	8	553316	1.28324	0.16050	10.26013	0.56681	False
CONGENITAL PNEUMONIA	1	1	1	53898	0	553324	-100.00000	-100.00000	-100.00000	0.08876	False
CONGENITAL SKIN DISORDER	2	1	1	53898	1	553323	10.26594	0.64210	164.13287	0.16965	False
CONGENITAL SYPHILITIC OSTEOCHONDRITIS	1	1	1	53898	0	553324	-100.00000	-100.00000	-100.00000	0.08876	False
CONGENITAL THROMBOCYTE DISORDER	1	1	1	53898	0	553324	-100.00000	-100.00000	-100.00000	0.08876	False
CONGENITAL TONGUE ANOMALY	2	1	1	53898	1	553323	10.26594	0.64210	164.13287	0.16965	False
CONGESTIVE CARDIOMYOPATHY	26	3	3	53896	23	553301	1.33904	0.40206	4.45962	0.49895	False
CONJUNCTIVAL DEPOSIT	2	1	1	53898	1	553323	10.26594	0.64210	164.13287	0.16965	False
CONJUNCTIVAL DISCOLOURATION	10	1	1	53898	9	553315	1.14066	0.14451	9.00347	0.60526	False
CONJUNCTIVAL HAEMORRHAGE	47	5	5	53894	42	553282	1.22214	0.48355	3.08887	0.60673	False
CONJUNCTIVAL HYPERAEMIA	108	4	4	53895	104	553220	0.39484	0.14545	1.07183	0.06128	False
CONJUNCTIVAL PALLOR	4	1	1	53898	3	553321	3.42198	0.35595	32.89811	0.31052	False
CONJUNCTIVITIS	1313	91	91	53808	1222	552102	0.76449	0.61795	0.94577	0.01152	True
CONJUNCTIVITIS ALLERGIC	12	1	1	53898	11	553313	0.93327	0.12049	7.22878	1.00000	False
CONJUNCTIVITIS INFECTIVE	53	7	7	53892	46	553278	1.56221	0.70537	3.45988	0.23220	False
CONNECTIVE TISSUE DISORDER	41	6	6	53893	35	553289	1.75988	0.74026	4.18388	0.17435	False
CONSCIOUSNESS FLUCTUATING	50	7	7	53892	43	553281	1.67120	0.75183	3.71482	0.20801	False
CONSTIPATION	1231	96	96	53803	1135	552189	0.86831	0.70515	1.06923	0.19222	False
CONTINUOUS HAEMODIAFILTRATION	4	1	1	53898	3	553321	3.42198	0.35595	32.89811	0.31052	False
CONTINUOUS POSITIVE AIRWAY PRESSURE	64	7	7	53892	57	553267	1.26073	0.57508	2.76384	0.50925	False
CONTRACEPTION	36	2	2	53897	34	553290	0.60388	0.14508	2.51356	0.76760	False
CONTRAINDICATION TO VACCINATION	288	47	47	53852	241	553083	2.00207	1.46488	2.73625	0.00005	True
CONTRAST MEDIA ALLERGY	5	2	2	53897	3	553321	6.84396	1.14358	40.95901	0.06571	False
CONTUSION	2750	425	425	53474	2325	550999	1.87657	1.69287	2.08020	0.00000	True
CONVERSION DISORDER	115	11	11	53888	104	553220	1.08582	0.58331	2.02122	0.74286	False
CONVULSION	14039	780	780	53119	13259	540065	0.60392	0.56216	0.64880	0.00000	True
CONVULSIVE THRESHOLD LOWERED	1	1	1	53898	0	553324	-100.00000	-100.00000	-100.00000	0.08876	False
COOMBS DIRECT TEST	8	2	2	53897	6	553318	3.42198	0.69067	16.95442	0.15415	False
COOMBS DIRECT TEST NEGATIVE	16	1	1	53898	15	553309	0.68440	0.09040	5.18123	1.00000	False
COOMBS DIRECT TEST POSITIVE	44	6	6	53893	38	553286	1.62094	0.68525	3.83429	0.28073	False
COOMBS INDIRECT TEST	2	2	2	53897	0	553324	-100.00000	-100.00000	-100.00000	0.00788	True
COOMBS INDIRECT TEST NEGATIVE	9	1	1	53898	8	553316	1.28324	0.16050	10.26013	0.56681	False
COOMBS INDIRECT TEST POSITIVE	13	1	1	53898	12	553312	0.85550	0.11124	6.57937	1.00000	False
COOMBS POSITIVE HAEMOLYTIC ANAEMIA	13	2	2	53897	11	553313	1.86653	0.41372	8.42094	0.32309	False
COOMBS TEST NEGATIVE	13	2	2	53897	11	553313	1.86653	0.41372	8.42094	0.32309	False
COOMBS TEST POSITIVE	15	1	1	53898	14	553310	0.73328	0.09642	5.57643	1.00000	False
COORDINATION ABNORMAL	1254	108	108	53791	1146	552178	0.96747	0.79441	1.17824	0.80367	False
COR PULMONALE	4	3	3	53896	1	553323	30.79783	3.20351	296.08301	0.00261	True
CORNEAL ABRASION	14	3	3	53896	11	553313	2.79980	0.78111	10.03564	0.12166	False
CORNEAL DISORDER	12	2	2	53897	10	553314	2.05319	0.44987	9.37060	0.28908	False
CORNEAL DYSTROPHY	1	1	1	53898	0	553324	-100.00000	-100.00000	-100.00000	0.08876	False
CORNEAL GRAFT REJECTION	8	1	1	53898	7	553317	1.46656	0.18043	11.92016	0.52461	False
CORNEAL OPACITY	10	1	1	53898	9	553315	1.14066	0.14451	9.00347	0.60526	False
CORNEAL REFLEX DECREASED	42	6	6	53893	36	553288	1.71099	0.72097	4.06050	0.26777	False
CORNEAL TRANSPLANT	4	2	2	53897	2	553322	10.26594	1.44607	72.87982	0.04186	True
CORONARY ANGIOPLASTY	4	1	1	53898	3	553321	3.42198	0.35595	32.89811	0.31052	False
CORONARY ARTERIAL STENT INSERTION	16	7	7	53892	9	553315	7.98462	2.97371	21.43928	0.00024	True
CORONARY ARTERY ANEURYSM	17	1	1	53898	16	553308	0.64162	0.08509	4.83821	1.00000	False
CORONARY ARTERY ATHEROSCLEROSIS	4	1	1	53898	3	553321	3.42198	0.35595	32.89811	0.31052	False
CORONARY ARTERY BYPASS	5	2	2	53897	3	553321	6.84396	1.14358	40.95901	0.06571	False
CORONARY ARTERY DILATATION	30	2	2	53897	28	553296	0.73328	0.17468	3.07812	1.00000	False
CORONARY ARTERY DISEASE	96	29	29	53870	67	553257	4.44347	2.87444	6.86896	0.00000	True
CORONARY ARTERY EMBOLISM	1	1	1	53898	0	553324	-100.00000	-100.00000	-100.00000	0.08876	False
CORONARY ARTERY OCCLUSION	21	5	5	53894	16	553308	3.20811	1.17529	8.75691	0.03357	True
CORONARY ARTERY PERFORATION	1	1	1	53898	0	553324	-100.00000	-100.00000	-100.00000	0.08876	False
CORONARY ARTERY STENOSIS	3	1	1	53898	2	553322	5.13297	0.46543	56.60902	0.24335	False
CORONARY ARTERY THROMBOSIS	4	2	2	53897	2	553322	10.26594	1.44607	72.87982	0.04186	True
CORRECTIVE LENS USER	25	3	3	53896	22	553302	1.39990	0.41901	4.67704	0.48291	False
CORTISOL INCREASED	1	1	1	53898	0	553324	-100.00000	-100.00000	-100.00000	0.08876	False
CORYNEBACTERIUM TEST POSITIVE	20	1	1	53898	19	553305	0.54031	0.07233	4.03615	1.00000	False
COSTOCHONDRITIS	35	5	5	53894	30	553294	1.71099	0.66388	4.40967	0.23410	False
COSTOVERTEBRAL ANGLE TENDERNESS	3	1	1	53898	2	553322	5.13297	0.46543	56.60902	0.24335	False
COUGH	13116	1741	1741	52158	11375	541949	1.57125	1.49513	1.65125	0.00000	True
COUGH DECREASED	17	1	1	53898	16	553308	0.64162	0.08509	4.83821	1.00000	False
COW'S MILK INTOLERANCE	33	4	4	53895	29	553295	1.41599	0.49781	4.02770	0.53212	False
COW POX	130	6	6	53893	124	553200	0.49674	0.21894	1.12700	0.09039	False
COXIELLA TEST	5	1	1	53898	4	553320	2.56649	0.28685	22.96259	0.37172	False
COXSACKIE VIRAL INFECTION	25	1	1	53898	24	553300	0.42775	0.05787	3.16191	0.72131	False
COXSACKIE VIRUS TEST	8	1	1	53898	7	553317	1.46656	0.18043	11.92016	0.52461	False
COXSACKIE VIRUS TEST NEGATIVE	22	1	1	53898	21	553303	0.48885	0.06576	3.63429	0.71640	False
COXSACKIE VIRUS TEST POSITIVE	8	2	2	53897	6	553318	3.42198	0.69067	16.95442	0.15415	False
CRANIAL NERVE DISORDER	38	6	6	53893	32	553292	1.92486	0.80488	4.60329	0.14566	False
CRANIOTOMY	8	1	1	53898	7	553317	1.46656	0.18043	11.92016	0.52461	False
CREATININE RENAL CLEARANCE	2	1	1	53898	1	553323	10.26594	0.64210	164.13287	0.16965	False
CREATININE RENAL CLEARANCE DECREASED	14	5	5	53894	9	553315	5.70330	1.91142	17.01755	0.00556	True
CREATININE RENAL CLEARANCE INCREASED	6	1	1	53898	5	553319	2.05319	0.23987	17.57448	0.42749	False
CREATININE RENAL CLEARANCE NORMAL	3	1	1	53898	2	553322	5.13297	0.46543	56.60902	0.24335	False
CREATININE URINE DECREASED	6	1	1	53898	5	553319	2.05319	0.23987	17.57448	0.42749	False
CREATININE URINE NORMAL	2	1	1	53898	1	553323	10.26594	0.64210	164.13287	0.16965	False
CREPITATIONS	67	14	14	53885	53	553271	2.71176	1.50485	4.88661	0.00200	True
CREUTZFELDT-JAKOB DISEASE	1	1	1	53898	0	553324	-100.00000	-100.00000	-100.00000	0.08876	False
CROHN'S DISEASE	114	13	13	53886	101	553223	1.32136	0.74170	2.35402	0.32267	False
CROSS SENSITIVITY REACTION	1	1	1	53898	0	553324	-100.00000	-100.00000	-100.00000	0.08876	False
CROUP INFECTIOUS	176	5	5	53894	171	553153	0.30017	0.12336	0.73039	0.00215	True
CRUSH SYNDROME	1	1	1	53898	0	553324	-100.00000	-100.00000	-100.00000	0.08876	False
CRYING	12771	353	353	53546	12418	540906	0.29182	0.26263	0.32427	0.00000	True
CRYOGLOBULINAEMIA	7	2	2	53897	5	553319	4.10638	0.79669	21.16547	0.12257	False
CRYOGLOBULINS	5	1	1	53898	4	553320	2.56649	0.28685	22.96259	0.37172	False
CRYOGLOBULINS ABSENT	27	8	8	53891	19	553305	4.32250	1.89234	9.87351	0.00183	True
CRYOGLOBULINS PRESENT	8	2	2	53897	6	553318	3.42198	0.69067	16.95442	0.15415	False
CRYPTOCOCCOSIS	3	1	1	53898	2	553322	5.13297	0.46543	56.60902	0.24335	False
CRYPTOCOCCUS ANTIGEN	5	1	1	53898	4	553320	2.56649	0.28685	22.96259	0.37172	False
CRYPTOCOCCUS TEST	21	3	3	53896	18	553306	1.71099	0.50400	5.80846	0.42661	False
CRYSTAL URINE ABSENT	5	1	1	53898	4	553320	2.56649	0.28685	22.96259	0.37172	False
CRYSTAL URINE PRESENT	12	2	2	53897	10	553314	2.05319	0.44987	9.37060	0.28908	False
CSF BACTERIA NO ORGANISMS OBSERVED	9	1	1	53898	8	553316	1.28324	0.16050	10.26013	0.56681	False
CSF CELL COUNT	69	5	5	53894	64	553260	0.80203	0.32281	1.99268	0.83215	False
CSF CELL COUNT ABNORMAL	25	2	2	53897	23	553301	0.89269	0.21047	3.78630	1.00000	False
CSF CELL COUNT DECREASED	2	1	1	53898	1	553323	10.26594	0.64210	164.13287	0.16965	False
CSF CELL COUNT INCREASED	99	7	7	53892	92	553232	0.78110	0.36223	1.68435	0.72229	False
CSF CELL COUNT NORMAL	188	26	26	53873	162	553162	1.64762	1.08909	2.49259	0.02789	True
CSF CULTURE	68	3	3	53896	65	553259	0.47381	0.14892	1.50749	0.28263	False
CSF CULTURE NEGATIVE	511	41	41	53858	470	552854	0.89554	0.65091	1.23210	0.58551	False
CSF CULTURE POSITIVE	162	7	7	53892	155	553169	0.46362	0.21741	0.98868	0.03789	True
CSF ELECTROPHORESIS ABNORMAL	8	2	2	53897	6	553318	3.42198	0.69067	16.95442	0.15415	False
CSF GLUCOSE	82	9	9	53890	73	553251	1.26566	0.63332	2.52939	0.44011	False
CSF GLUCOSE ABNORMAL	12	1	1	53898	11	553313	0.93327	0.12049	7.22878	1.00000	False
CSF GLUCOSE DECREASED	63	5	5	53894	58	553266	0.88499	0.35499	2.20631	1.00000	False
CSF GLUCOSE INCREASED	75	11	11	53888	64	553260	1.76446	0.93069	3.34517	0.09912	False
CSF GLUCOSE NORMAL	341	41	41	53858	300	553024	1.40301	1.01247	1.94420	0.04527	True
CSF IMMUNOGLOBULIN	18	4	4	53895	14	553310	2.93313	0.96550	8.91067	0.06935	False
CSF IMMUNOGLOBULIN DECREASED	5	1	1	53898	4	553320	2.56649	0.28685	22.96259	0.37172	False
CSF IMMUNOGLOBULIN G INDEX	24	2	2	53897	22	553302	0.93327	0.21946	3.96881	1.00000	False
CSF IMMUNOGLOBULIN INCREASED	64	9	9	53890	55	553269	1.67988	0.83029	3.39883	0.18035	False
CSF LACTATE	31	4	4	53895	27	553297	1.52088	0.53219	4.34636	0.35058	False
CSF LACTATE DECREASED	4	1	1	53898	3	553321	3.42198	0.35595	32.89811	0.31052	False
CSF LACTATE DEHYDROGENASE INCREASED	2	1	1	53898	1	553323	10.26594	0.64210	164.13287	0.16965	False
CSF LACTATE INCREASED	5	1	1	53898	4	553320	2.56649	0.28685	22.96259	0.37172	False
CSF LACTATE NORMAL	45	2	2	53897	43	553281	0.47749	0.11567	1.97101	0.43181	False
CSF LYMPHOCYTE COUNT	19	3	3	53896	16	553308	1.92486	0.56088	6.60590	0.23506	False
CSF LYMPHOCYTE COUNT ABNORMAL	26	3	3	53896	23	553301	1.33904	0.40206	4.45962	0.49895	False
CSF LYMPHOCYTE COUNT INCREASED	67	3	3	53896	64	553260	0.48122	0.15119	1.53166	0.28112	False
CSF LYMPHOCYTE COUNT NORMAL	33	8	8	53891	25	553299	3.28510	1.48185	7.28272	0.00707	True
CSF MONOCYTE COUNT	22	2	2	53897	20	553304	1.02659	0.23996	4.39204	1.00000	False
CSF MONOCYTE COUNT DECREASED	21	2	2	53897	19	553305	1.08063	0.25171	4.63929	0.70955	False
CSF MONOCYTE COUNT INCREASED	17	1	1	53898	16	553308	0.64162	0.08509	4.83821	1.00000	False
CSF MONOCYTE COUNT NEGATIVE	9	1	1	53898	8	553316	1.28324	0.16050	10.26013	0.56681	False
CSF MYELIN BASIC PROTEIN	11	5	5	53894	6	553318	8.55495	2.61092	28.03115	0.00161	True
CSF MYELIN BASIC PROTEIN INCREASED	17	2	2	53897	15	553309	1.36879	0.31302	5.98548	0.65898	False
CSF MYELIN BASIC PROTEIN NORMAL	8	4	4	53895	4	553320	10.26594	2.56750	41.04762	0.00324	True
CSF NEUTROPHIL COUNT	9	3	3	53896	6	553318	5.13297	1.28375	20.52381	0.03906	True
CSF NEUTROPHIL COUNT DECREASED	2	1	1	53898	1	553323	10.26594	0.64210	164.13287	0.16965	False
CSF NEUTROPHIL COUNT INCREASED	29	5	5	53894	24	553300	2.13874	0.81606	5.60525	0.17696	False
CSF OLIGOCLONAL BAND	16	3	3	53896	13	553311	2.36906	0.67511	8.31340	0.16445	False
CSF OLIGOCLONAL BAND ABSENT	97	13	13	53886	84	553240	1.58878	0.88592	2.84925	0.14878	False
CSF OLIGOCLONAL BAND PRESENT	129	9	9	53890	120	553204	0.76995	0.39111	1.51573	0.53692	False
CSF POLYMORPHONUCLEAR CELL COUNT INCREASED	13	2	2	53897	11	553313	1.86653	0.41372	8.42094	0.32309	False
CSF PRESSURE	4	1	1	53898	3	553321	3.42198	0.35595	32.89811	0.31052	False
CSF PRESSURE INCREASED	32	2	2	53897	30	553294	0.68440	0.16356	2.86376	1.00000	False
CSF PRESSURE NORMAL	12	2	2	53897	10	553314	2.05319	0.44987	9.37060	0.28908	False
CSF PROTEIN	105	12	12	53887	93	553231	1.32464	0.72615	2.41639	0.38746	False
CSF PROTEIN ABNORMAL	22	2	2	53897	20	553304	1.02659	0.23996	4.39204	1.00000	False
CSF PROTEIN DECREASED	32	2	2	53897	30	553294	0.68440	0.16356	2.86376	1.00000	False
CSF PROTEIN INCREASED	617	94	94	53805	523	552801	1.84512	1.48164	2.29778	0.00000	True
CSF PROTEIN NORMAL	293	28	28	53871	265	553059	1.08470	0.73486	1.60110	0.68055	False
CSF RED BLOOD CELL COUNT	12	4	4	53895	8	553316	5.13297	1.54569	17.04577	0.01717	True
CSF RED BLOOD CELL COUNT POSITIVE	50	3	3	53896	47	553277	0.65527	0.20396	2.10523	0.62316	False
CSF TEST	218	23	23	53876	195	553129	1.21085	0.78608	1.86517	0.40286	False
CSF TEST ABNORMAL	1154	105	105	53794	1049	552275	1.02757	0.84095	1.25562	0.79552	False
CSF TEST NORMAL	513	38	38	53861	475	552849	0.82128	0.59025	1.14272	0.27644	False
CSF VIRUS IDENTIFIED	16	2	2	53897	14	553310	1.46656	0.33331	6.45281	0.64777	False
CSF VIRUS NO ORGANISMS OBSERVED	61	6	6	53893	55	553269	1.11992	0.48221	2.60100	0.82012	False
CSF VOLUME INCREASED	3	1	1	53898	2	553322	5.13297	0.46543	56.60902	0.24335	False
CSF WHITE BLOOD CELL COUNT	32	3	3	53896	29	553295	1.06199	0.32351	3.48620	0.75962	False
CSF WHITE BLOOD CELL COUNT INCREASED	281	29	29	53870	252	553072	1.18140	0.80450	1.73487	0.40024	False
CSF WHITE BLOOD CELL COUNT NEGATIVE	206	26	26	53873	180	553144	1.48286	0.98300	2.23690	0.06533	False
CSF WHITE BLOOD CELL COUNT POSITIVE	18	5	5	53894	13	553311	3.94844	1.40767	11.07514	0.01765	True
CSF WHITE BLOOD CELL DIFFERENTIAL	5	1	1	53898	4	553320	2.56649	0.28685	22.96259	0.37172	False
CUBITAL TUNNEL SYNDROME	4	2	2	53897	2	553322	10.26594	1.44607	72.87982	0.04186	True
CULTURE	340	57	57	53842	283	553041	2.06770	1.55585	2.74794	0.00000	True
CULTURE NEGATIVE	412	52	52	53847	360	552964	1.48286	1.10886	1.98300	0.01159	True
CULTURE POSITIVE	211	17	17	53882	194	553130	0.89959	0.54799	1.47679	0.80832	False
CULTURE STOOL	193	12	12	53887	181	553143	0.68061	0.37948	1.22071	0.25265	False
CULTURE STOOL NEGATIVE	381	23	23	53876	358	552966	0.65954	0.43269	1.00533	0.05764	False
CULTURE STOOL POSITIVE	170	12	12	53887	158	553166	0.77969	0.43358	1.40210	0.49943	False
CULTURE THROAT	122	10	10	53889	112	553212	0.91660	0.48003	1.75022	1.00000	False
CULTURE THROAT NEGATIVE	195	17	17	53882	178	553146	0.98046	0.59618	1.61242	1.00000	False
CULTURE THROAT POSITIVE	63	6	6	53893	57	553267	1.08063	0.46597	2.50608	0.82353	False
CULTURE TISSUE SPECIMEN	2	1	1	53898	1	553323	10.26594	0.64210	164.13287	0.16965	False
CULTURE TISSUE SPECIMEN POSITIVE	5	1	1	53898	4	553320	2.56649	0.28685	22.96259	0.37172	False
CULTURE URINE	312	43	43	53856	269	553055	1.64102	1.18951	2.26393	0.00376	True
CULTURE URINE NEGATIVE	680	76	76	53823	604	552720	1.29174	1.01776	1.63948	0.04256	True
CULTURE URINE POSITIVE	134	21	21	53878	113	553211	1.90783	1.19757	3.03934	0.00933	True
CULTURE WOUND	42	3	3	53896	39	553285	0.78969	0.24404	2.55531	1.00000	False
CULTURE WOUND NEGATIVE	54	9	9	53890	45	553279	2.05319	1.00376	4.19977	0.05362	False
CULTURE WOUND POSITIVE	39	3	3	53896	36	553288	0.85550	0.26346	2.77793	1.00000	False
CUSHING'S SYNDROME	14	2	2	53897	12	553312	1.71099	0.38294	7.64476	0.35667	False
CUSHINGOID	11	3	3	53896	8	553316	3.84973	1.02133	14.51089	0.06715	False
CUTANEOUS LUPUS ERYTHEMATOSUS	20	4	4	53895	16	553308	2.56649	0.85804	7.67659	0.09550	False
CUTANEOUS SARCOIDOSIS	2	1	1	53898	1	553323	10.26594	0.64210	164.13287	0.16965	False
CUTANEOUS VASCULITIS	14	2	2	53897	12	553312	1.71099	0.38294	7.64476	0.35667	False
CYANOSIS	4522	222	222	53677	4300	549024	0.53001	0.46326	0.60638	0.00000	True
CYANOSIS NEONATAL	9	2	2	53897	7	553317	2.93313	0.60933	14.11926	0.18703	False
CYCLIC VOMITING SYNDROME	2	1	1	53898	1	553323	10.26594	0.64210	164.13287	0.16965	False
CYST	211	24	24	53875	187	553137	1.31755	0.86147	2.01510	0.22407	False
CYST ASPIRATION	4	1	1	53898	3	553321	3.42198	0.35595	32.89811	0.31052	False
CYST REMOVAL	7	1	1	53898	6	553318	1.71099	0.20599	14.21213	0.47830	False
CYSTIC FIBROSIS	4	1	1	53898	3	553321	3.42198	0.35595	32.89811	0.31052	False
CYSTITIS	145	20	20	53879	125	553199	1.64255	1.02460	2.63320	0.05530	False
CYSTITIS-LIKE SYMPTOM	1	1	1	53898	0	553324	-100.00000	-100.00000	-100.00000	0.08876	False
CYSTITIS NONINFECTIVE	3	1	1	53898	2	553322	5.13297	0.46543	56.60902	0.24335	False
CYSTOGRAM	7	1	1	53898	6	553318	1.71099	0.20599	14.21213	0.47830	False
CYSTOSCOPY	12	2	2	53897	10	553314	2.05319	0.44987	9.37060	0.28908	False
CYSTOSCOPY ABNORMAL	5	1	1	53898	4	553320	2.56649	0.28685	22.96259	0.37172	False
CYSTOSCOPY NORMAL	6	1	1	53898	5	553319	2.05319	0.23987	17.57448	0.42749	False
CYTOGENETIC ANALYSIS	72	1	1	53898	71	553253	0.14459	0.02009	1.04069	0.02020	True
CYTOGENETIC ANALYSIS ABNORMAL	26	1	1	53898	25	553299	0.41064	0.05564	3.03057	0.72489	False
CYTOGENETIC ANALYSIS NORMAL	79	2	2	53897	77	553247	0.26665	0.06551	1.08541	0.04600	True
CYTOKINE RELEASE SYNDROME	1	1	1	53898	0	553324	-100.00000	-100.00000	-100.00000	0.08876	False
CYTOLOGY	6	1	1	53898	5	553319	2.05319	0.23987	17.57448	0.42749	False
CYTOLOGY ABNORMAL	31	1	1	53898	30	553294	0.34220	0.04667	2.50932	0.51983	False
CYTOLOGY NORMAL	19	2	2	53897	17	553307	1.20776	0.27904	5.22747	0.68352	False
CYTOMEGALOVIRUS ANTIBODY NEGATIVE	40	6	6	53893	34	553290	1.81164	0.76062	4.31496	0.16406	False
CYTOMEGALOVIRUS ANTIBODY POSITIVE	23	5	5	53894	18	553306	2.85165	1.05877	7.68052	0.04792	True
CYTOMEGALOVIRUS COLITIS	2	1	1	53898	1	553323	10.26594	0.64210	164.13287	0.16965	False
CYTOMEGALOVIRUS INFECTION	37	2	2	53897	35	553289	0.58663	0.14110	2.43898	0.76954	False
CYTOMEGALOVIRUS SEROLOGY	8	1	1	53898	7	553317	1.46656	0.18043	11.92016	0.52461	False
CYTOMEGALOVIRUS TEST	73	12	12	53887	61	553263	2.01953	1.08759	3.75002	0.03582	True
CYTOMEGALOVIRUS TEST NEGATIVE	349	40	40	53859	309	553015	1.32892	0.95613	1.84707	0.09030	False
CYTOMEGALOVIRUS TEST POSITIVE	108	16	16	53883	92	553232	1.78538	1.05001	3.03575	0.04022	True
DARK CIRCLES UNDER EYES	66	8	8	53891	58	553266	1.41599	0.67616	2.96533	0.38115	False
DEAFNESS	608	43	43	53856	565	552759	0.78130	0.57308	1.06518	0.13351	False
DEAFNESS BILATERAL	42	7	7	53892	35	553289	2.05319	0.91204	4.62216	0.09494	False
DEAFNESS NEUROSENSORY	80	13	13	53886	67	553257	1.99190	1.09982	3.60756	0.02879	True
DEAFNESS PERMANENT	20	1	1	53898	19	553305	0.54031	0.07233	4.03615	1.00000	False
DEAFNESS TRANSITORY	48	4	4	53895	44	553280	0.93327	0.33534	2.59731	1.00000	False
DEAFNESS UNILATERAL	209	45	45	53854	164	553160	2.81687	2.02569	3.91708	0.00000	True
DEATH	2766	275	275	53624	2491	550833	1.13333	1.00093	1.28325	0.05188	False
DEATH NEONATAL	30	3	3	53896	27	553297	1.14066	0.34605	3.75990	0.74612	False
DEATH OF COMPANION	1	1	1	53898	0	553324	-100.00000	-100.00000	-100.00000	0.08876	False
DEBRIDEMENT	46	8	8	53891	38	553286	2.16125	1.00835	4.63234	0.06166	False
DECREASED ACTIVITY	277	18	18	53881	259	553065	0.71346	0.44251	1.15034	0.20341	False
DECREASED APPETITE	5012	627	627	53272	4385	548939	1.46790	1.35069	1.59528	0.00000	True
DECREASED EYE CONTACT	259	11	11	53888	248	553076	0.45534	0.24894	0.83290	0.00605	True
DECREASED IMMUNE RESPONSIVENESS	42	3	3	53896	39	553285	0.78969	0.24404	2.55531	1.00000	False
DECREASED INTEREST	44	3	3	53896	41	553283	0.75117	0.23261	2.42569	1.00000	False
DECREASED VIBRATORY SENSE	41	4	4	53895	37	553287	1.10983	0.39559	3.11361	0.78200	False
DECUBITUS ULCER	8	2	2	53897	6	553318	3.42198	0.69067	16.95442	0.15415	False
DEEP VEIN THROMBOSIS	119	21	21	53878	98	553226	2.19984	1.37322	3.52406	0.00304	True
DEFAECATION URGENCY	25	7	7	53892	18	553306	3.99231	1.66756	9.55800	0.00496	True
DEFORMITY	11	3	3	53896	8	553316	3.84973	1.02133	14.51089	0.06715	False
DEHYDRATION	2406	240	240	53659	2166	551158	1.13750	0.99579	1.29937	0.06170	False
DEHYDROEPIANDROSTERONE DECREASED	1	1	1	53898	0	553324	-100.00000	-100.00000	-100.00000	0.08876	False
DELIRIUM	578	37	37	53862	541	552783	0.70211	0.50328	0.97948	0.03385	True
DELIRIUM FEBRILE	7	1	1	53898	6	553318	1.71099	0.20599	14.21213	0.47830	False
DELIVERY	119	4	4	53895	115	553209	0.35708	0.13177	0.96759	0.03425	True
DELTARETROVIRUS TEST POSITIVE	1	1	1	53898	0	553324	-100.00000	-100.00000	-100.00000	0.08876	False
DELUSION	63	15	15	53884	48	553276	3.20811	1.79674	5.72813	0.00033	True
DELUSIONAL PERCEPTION	15	1	1	53898	14	553310	0.73328	0.09642	5.57643	1.00000	False
DEMENTIA	110	11	11	53888	99	553225	1.14066	0.61186	2.12649	0.61580	False
DEMENTIA ALZHEIMER'S TYPE	7	1	1	53898	6	553318	1.71099	0.20599	14.21213	0.47830	False
DEMYELINATING POLYNEUROPATHY	98	12	12	53887	86	553238	1.43246	0.78307	2.62037	0.21661	False
DEMYELINATION	576	51	51	53848	525	552799	0.99726	0.74820	1.32923	1.00000	False
DENERVATION ATROPHY	5	1	1	53898	4	553320	2.56649	0.28685	22.96259	0.37172	False
DENGUE FEVER	8	1	1	53898	7	553317	1.46656	0.18043	11.92016	0.52461	False
DENTAL CARIES	19	2	2	53897	17	553307	1.20776	0.27904	5.22747	0.68352	False
DENTAL EXAMINATION	4	2	2	53897	2	553322	10.26594	1.44607	72.87982	0.04186	True
DENTAL EXAMINATION NORMAL	6	1	1	53898	5	553319	2.05319	0.23987	17.57448	0.42749	False
DEPENDENCE ON RESPIRATOR	2	1	1	53898	1	553323	10.26594	0.64210	164.13287	0.16965	False
DEPERSONALISATION	74	4	4	53895	70	553254	0.58663	0.21418	1.60673	0.41153	False
DEPRESSED LEVEL OF CONSCIOUSNESS	1303	71	71	53828	1232	552092	0.59162	0.46583	0.75139	0.00000	True
DEPRESSED MOOD	176	11	11	53888	165	553159	0.68440	0.37176	1.25994	0.28701	False
DEPRESSION	1145	173	173	53726	972	552352	1.82717	1.55469	2.14740	0.00000	True
DEPRESSION SUICIDAL	6	1	1	53898	5	553319	2.05319	0.23987	17.57448	0.42749	False
DEPRESSIVE SYMPTOM	9	1	1	53898	8	553316	1.28324	0.16050	10.26013	0.56681	False
DEREALISATION	7	1	1	53898	6	553318	1.71099	0.20599	14.21213	0.47830	False
DERMAL CYST	21	6	6	53893	15	553309	4.10638	1.59331	10.58322	0.00823	True
DERMATITIS	387	57	57	53842	330	552994	1.77321	1.33883	2.34853	0.00016	True
DERMATITIS ACNEIFORM	48	5	5	53894	43	553281	1.19371	0.47285	3.01357	0.61326	False
DERMATITIS ALLERGIC	205	21	21	53878	184	553140	1.17166	0.74606	1.84004	0.46136	False
DERMATITIS ATOPIC	144	6	6	53893	138	553186	0.44635	0.19711	1.01072	0.05459	False
DERMATITIS BULLOUS	5609	217	217	53682	5392	547932	0.41315	0.36083	0.47306	0.00000	True
DERMATITIS CONTACT	220	19	19	53880	201	553123	0.97041	0.60630	1.55319	1.00000	False
DERMATITIS DIAPER	158	6	6	53893	152	553172	0.40523	0.17924	0.91619	0.02387	True
DERMATITIS EXFOLIATIVE	210	18	18	53881	192	553132	0.96243	0.59371	1.56014	1.00000	False
DERMATITIS INFECTED	10	3	3	53896	7	553317	4.39969	1.13773	17.01395	0.05219	False
DERMATITIS PSORIASIFORM	15	1	1	53898	14	553310	0.73328	0.09642	5.57643	1.00000	False
DERMATOLOGIC EXAMINATION	11	4	4	53895	7	553317	5.86625	1.71730	20.03898	0.01230	True
DERMATOMYOSITIS	98	5	5	53894	93	553231	0.55193	0.22446	1.35719	0.28249	False
DERMATOSIS	9	2	2	53897	7	553317	2.93313	0.60933	14.11926	0.18703	False
DERMO-HYPODERMITIS	5	1	1	53898	4	553320	2.56649	0.28685	22.96259	0.37172	False
DERMOGRAPHISM	13	1	1	53898	12	553312	0.85550	0.11124	6.57937	1.00000	False
DERMOID CYST	1	1	1	53898	0	553324	-100.00000	-100.00000	-100.00000	0.08876	False
DEVELOPMENTAL DELAY	377	8	8	53891	369	552955	0.22257	0.11048	0.44837	0.00000	True
DEVICE ALARM ISSUE	1	1	1	53898	0	553324	-100.00000	-100.00000	-100.00000	0.08876	False
DEVICE FUNCTION TEST	1	1	1	53898	0	553324	-100.00000	-100.00000	-100.00000	0.08876	False
DEVICE INFUSION ISSUE	1	1	1	53898	0	553324	-100.00000	-100.00000	-100.00000	0.08876	False
DEVICE MALFUNCTION	17	2	2	53897	15	553309	1.36879	0.31302	5.98548	0.65898	False
DEVICE MATERIAL OPACIFICATION	1	1	1	53898	0	553324	-100.00000	-100.00000	-100.00000	0.08876	False
DEVICE RELATED INFECTION	8	2	2	53897	6	553318	3.42198	0.69067	16.95442	0.15415	False
DIABETES INSIPIDUS	23	3	3	53896	20	553304	1.53989	0.45760	5.18201	0.45281	False
DIABETES MELLITUS	516	60	60	53839	456	552868	1.35078	1.03217	1.76775	0.03602	True
DIABETES MELLITUS INADEQUATE CONTROL	15	4	4	53895	11	553313	3.73307	1.18871	11.72344	0.03822	True
DIABETES MELLITUS INSULIN-DEPENDENT	11	1	1	53898	10	553314	1.02659	0.13141	8.01964	1.00000	False
DIABETIC AMYOTROPHY	1	1	1	53898	0	553324	-100.00000	-100.00000	-100.00000	0.08876	False
DIABETIC COMPLICATION	2	1	1	53898	1	553323	10.26594	0.64210	164.13287	0.16965	False
DIABETIC END STAGE RENAL DISEASE	2	1	1	53898	1	553323	10.26594	0.64210	164.13287	0.16965	False
DIABETIC FOETOPATHY	3	2	2	53897	1	553323	20.53188	1.86171	226.43607	0.02224	True
DIABETIC FOOT	1	1	1	53898	0	553324	-100.00000	-100.00000	-100.00000	0.08876	False
DIABETIC KETOACIDOSIS	42	4	4	53895	38	553286	1.08063	0.38569	3.02766	0.78607	False
DIABETIC NEPHROPATHY	1	1	1	53898	0	553324	-100.00000	-100.00000	-100.00000	0.08876	False
DIABETIC NEUROPATHY	7	4	4	53895	3	553321	13.68792	3.06352	61.15811	0.00174	True
DIAGNOSTIC ASPIRATION	2	1	1	53898	1	553323	10.26594	0.64210	164.13287	0.16965	False
DIAGNOSTIC PROCEDURE	152	18	18	53881	134	553190	1.37901	0.84317	2.25536	0.19818	False
DIALYSIS	48	10	10	53889	38	553286	2.70156	1.34620	5.42152	0.00855	True
DIAPHRAGM MUSCLE WEAKNESS	1	1	1	53898	0	553324	-100.00000	-100.00000	-100.00000	0.08876	False
DIAPHRAGMALGIA	5	1	1	53898	4	553320	2.56649	0.28685	22.96259	0.37172	False
DIAPHRAGMATIC DISORDER	2	1	1	53898	1	553323	10.26594	0.64210	164.13287	0.16965	False
DIAPHRAGMATIC PARALYSIS	6	1	1	53898	5	553319	2.05319	0.23987	17.57448	0.42749	False
DIARRHOEA	16105	1657	1657	52242	14448	538876	1.17737	1.11988	1.23781	0.00000	True
DIARRHOEA HAEMORRHAGIC	415	26	26	53873	389	552935	0.68616	0.46136	1.02048	0.06904	False
DIARRHOEA INFECTIOUS	10	1	1	53898	9	553315	1.14066	0.14451	9.00347	0.60526	False
DIARRHOEA NEONATAL	1	1	1	53898	0	553324	-100.00000	-100.00000	-100.00000	0.08876	False
DIASTOLIC DYSFUNCTION	8	3	3	53896	5	553319	6.15957	1.47204	25.77385	0.02785	True
DIET NONCOMPLIANCE	1	1	1	53898	0	553324	-100.00000	-100.00000	-100.00000	0.08876	False
DIET REFUSAL	664	37	37	53862	627	552697	0.60581	0.43489	0.84390	0.00205	True
DIFFERENTIAL WHITE BLOOD CELL COUNT	304	64	64	53835	240	553084	2.73758	2.07815	3.60626	0.00000	True
DIFFERENTIAL WHITE BLOOD CELL COUNT ABNORMAL	49	8	8	53891	41	553283	2.00311	0.93912	4.27255	0.07593	False
DIFFERENTIAL WHITE BLOOD CELL COUNT NORMAL	225	42	42	53857	183	553141	2.35612	1.68503	3.29448	0.00001	True
DIFFICULTY IN WALKING	717	93	93	53806	624	552700	1.53002	1.23072	1.90211	0.00028	True
DIFFUSE ALVEOLAR DAMAGE	4	2	2	53897	2	553322	10.26594	1.44607	72.87982	0.04186	True
DIFFUSE VASCULITIS	3	2	2	53897	1	553323	20.53188	1.86171	226.43607	0.02224	True
DIGITAL ULCER	1	1	1	53898	0	553324	-100.00000	-100.00000	-100.00000	0.08876	False
DIPHTHERIA TOXIN ANTIBODY ABSENT	1	1	1	53898	0	553324	-100.00000	-100.00000	-100.00000	0.08876	False
DIPLEGIA	171	19	19	53880	152	553172	1.28324	0.79656	2.06729	0.28281	False
DIPLOPIA	749	100	100	53799	649	552675	1.58181	1.28171	1.95217	0.00005	True
DISABILITY	263	25	25	53874	238	553086	1.07836	0.71424	1.62810	0.66526	False
DISCOMFORT	2102	355	355	53544	1747	551577	2.08610	1.86178	2.33744	0.00000	True
DISEASE PRODROMAL STAGE	4	1	1	53898	3	553321	3.42198	0.35595	32.89811	0.31052	False
DISEASE PROGRESSION	6	1	1	53898	5	553319	2.05319	0.23987	17.57448	0.42749	False
DISEASE RECURRENCE	2	1	1	53898	1	553323	10.26594	0.64210	164.13287	0.16965	False
DISEASE SUSCEPTIBILITY	3	1	1	53898	2	553322	5.13297	0.46543	56.60902	0.24335	False
DISORGANISED SPEECH	6	1	1	53898	5	553319	2.05319	0.23987	17.57448	0.42749	False
DISORIENTATION	992	148	148	53751	844	552480	1.80019	1.51202	2.14327	0.00000	True
DISSEMINATED INTRAVASCULAR COAGULATION	56	6	6	53893	50	553274	1.23191	0.52824	2.87295	0.63471	False
DISSEMINATED VARICELLA ZOSTER VACCINE VIRUS INFECTION	2	1	1	53898	1	553323	10.26594	0.64210	164.13287	0.16965	False
DISSOCIATION	55	5	5	53894	50	553274	1.02659	0.40941	2.57417	0.81509	False
DISSOCIATIVE DISORDER	21	2	2	53897	19	553305	1.08063	0.25171	4.63929	0.70955	False
DISSOCIATIVE FUGUE	2	1	1	53898	1	553323	10.26594	0.64210	164.13287	0.16965	False
DISTURBANCE IN ATTENTION	1310	120	120	53779	1190	552134	1.03522	0.85821	1.24874	0.69734	False
DISTURBANCE IN SOCIAL BEHAVIOUR	74	2	2	53897	72	553252	0.28517	0.06997	1.16222	0.06417	False
DIVERTICULITIS	25	5	5	53894	20	553304	2.56649	0.96327	6.83802	0.06539	False
DIVERTICULUM	12	3	3	53896	9	553315	3.42198	0.92643	12.63987	0.08381	False
DIVERTICULUM INTESTINAL	3	3	3	53896	0	553324	-100.00000	-100.00000	-100.00000	0.00070	True
DIZZINESS	25999	3118	3118	50781	22881	530443	1.39894	1.34900	1.45074	0.00000	True
DIZZINESS POSTURAL	278	30	30	53869	248	553076	1.24185	0.85030	1.81370	0.24661	False
DNA ANTIBODY	15	2	2	53897	13	553311	1.57938	0.35641	6.99874	0.38961	False
DNA ANTIBODY NEGATIVE	73	7	7	53892	66	553258	1.08881	0.49959	2.37297	0.83566	False
DNA ANTIBODY POSITIVE	34	4	4	53895	30	553294	1.36879	0.48224	3.88523	0.53968	False
DOUBLE STRANDED DNA ANTIBODY	65	11	11	53888	54	553270	2.09121	1.09356	3.99901	0.04460	True
DOUBLE STRANDED DNA ANTIBODY POSITIVE	28	2	2	53897	26	553298	0.78969	0.18743	3.32710	1.00000	False
DROOLING	412	41	41	53858	371	552953	1.13451	0.82181	1.56620	0.43510	False
DRUG ABUSE	2	1	1	53898	1	553323	10.26594	0.64210	164.13287	0.16965	False
DRUG ADMINISTERED AT INAPPROPRIATE SITE	987	123	123	53776	864	552460	1.46147	1.21017	1.76495	0.00017	True
DRUG ADMINISTERED TO PATIENT OF INAPPROPRIATE AGE	3891	82	82	53817	3809	549515	0.22100	0.17761	0.27500	0.00000	True
DRUG ADMINISTRATION ERROR	461	20	20	53879	441	552883	0.46558	0.29746	0.72872	0.00028	True
DRUG DEPENDENCE	10	1	1	53898	9	553315	1.14066	0.14451	9.00347	0.60526	False
DRUG DOSE OMISSION	43	1	1	53898	42	553282	0.24443	0.03364	1.77596	0.17811	False
DRUG EFFECT DECREASED	15	1	1	53898	14	553310	0.73328	0.09642	5.57643	1.00000	False
DRUG ERUPTION	78	15	15	53884	63	553261	2.44427	1.39196	4.29212	0.00402	True
DRUG EXPOSURE BEFORE PREGNANCY	87	12	12	53887	75	553249	1.64255	0.89308	3.02096	0.12703	False
DRUG EXPOSURE DURING PREGNANCY	2859	190	190	53709	2669	550655	0.73081	0.63097	0.84645	0.00002	True
DRUG HYPERSENSITIVITY	254	56	56	53843	198	553126	2.90350	2.15846	3.90570	0.00000	True
DRUG INEFFECTIVE	12549	372	372	53527	12177	541147	0.31362	0.28299	0.34757	0.00000	True
DRUG INTERACTION	71	19	19	53880	52	553272	3.75102	2.21817	6.34313	0.00001	True
DRUG INTOLERANCE	17	5	5	53894	12	553312	4.27748	1.50698	12.14133	0.01373	True
DRUG LEVEL	6	1	1	53898	5	553319	2.05319	0.23987	17.57448	0.42749	False
DRUG LEVEL BELOW THERAPEUTIC	2	1	1	53898	1	553323	10.26594	0.64210	164.13287	0.16965	False
DRUG LEVEL DECREASED	7	2	2	53897	5	553319	4.10638	0.79669	21.16547	0.12257	False
DRUG LEVEL INCREASED	16	5	5	53894	11	553313	4.66634	1.62136	13.42989	0.01044	True
DRUG LEVEL THERAPEUTIC	2	1	1	53898	1	553323	10.26594	0.64210	164.13287	0.16965	False
DRUG REACTION WITH EOSINOPHILIA AND SYSTEMIC SYMPTOMS	7	2	2	53897	5	553319	4.10638	0.79669	21.16547	0.12257	False
DRUG RESISTANCE	5	2	2	53897	3	553321	6.84396	1.14358	40.95901	0.06571	False
DRUG SCREEN	47	4	4	53895	43	553281	0.95497	0.34280	2.66035	1.00000	False
DRUG SCREEN NEGATIVE	117	15	15	53884	102	553222	1.50970	0.87807	2.59566	0.14135	False
DRUG SCREEN POSITIVE	24	5	5	53894	19	553305	2.70156	1.00876	7.23504	0.05626	False
DRUG TOXICITY	475	20	20	53879	455	552869	0.45125	0.28839	0.70608	0.00013	True
DRUG WITHDRAWAL SYNDROME	81	2	2	53897	79	553245	0.25990	0.06388	1.05746	0.04720	True
DRY EYE	246	34	34	53865	212	553112	1.64642	1.14640	2.36455	0.00955	True
DRY MOUTH	639	106	106	53793	533	552791	2.04163	1.65780	2.51433	0.00000	True
DRY SKIN	640	62	62	53837	578	552746	1.10119	0.84756	1.43071	0.44485	False
DRY THROAT	224	34	34	53865	190	553134	1.83706	1.27545	2.64597	0.00205	True
DUODENAL ULCER	4	2	2	53897	2	553322	10.26594	1.44607	72.87982	0.04186	True
DUODENITIS	18	1	1	53898	17	553307	0.60388	0.08036	4.53771	1.00000	False
DWARFISM	3	1	1	53898	2	553322	5.13297	0.46543	56.60902	0.24335	False
DYSAESTHESIA	174	23	23	53876	151	553173	1.56369	1.00846	2.42460	0.06000	False
DYSARTHRIA	732	147	147	53752	585	552739	2.57965	2.15338	3.09030	0.00000	True
DYSENTERY	15	1	1	53898	14	553310	0.73328	0.09642	5.57643	1.00000	False
DYSGEUSIA	1061	147	147	53752	914	552410	1.65109	1.38747	1.96478	0.00000	True
DYSGRAPHIA	103	17	17	53882	86	553238	2.02931	1.20627	3.41391	0.01343	True
DYSHIDROSIS	3	1	1	53898	2	553322	5.13297	0.46543	56.60902	0.24335	False
DYSKINESIA	2787	178	178	53721	2609	550715	0.70040	0.60189	0.81503	0.00000	True
DYSLEXIA	15	1	1	53898	14	553310	0.73328	0.09642	5.57643	1.00000	False
DYSLIPIDAEMIA	9	4	4	53895	5	553319	8.21275	2.20540	30.58368	0.00542	True
DYSMENORRHOEA	189	3	3	53896	186	553138	0.16558	0.05292	0.51807	0.00005	True
DYSMETRIA	3	1	1	53898	2	553322	5.13297	0.46543	56.60902	0.24335	False
DYSMORPHISM	21	4	4	53895	17	553307	2.41552	0.81281	7.17847	0.11008	False
DYSPAREUNIA	5	1	1	53898	4	553320	2.56649	0.28685	22.96259	0.37172	False
DYSPEPSIA	844	108	108	53791	736	552588	1.50642	1.23117	1.84320	0.00016	True
DYSPHAGIA	2427	358	358	53541	2069	551255	1.77632	1.58836	1.98653	0.00000	True
DYSPHEMIA	164	13	13	53886	151	553173	0.88382	0.50160	1.55730	0.78378	False
DYSPHONIA	1988	361	361	53538	1627	551697	2.27782	2.03304	2.55206	0.00000	True
DYSPHORIA	30	3	3	53896	27	553297	1.14066	0.34605	3.75990	0.74612	False
DYSPNOEA	17013	2444	2444	51455	14569	538755	1.72215	1.65145	1.79587	0.00000	True
DYSPNOEA AT REST	1	1	1	53898	0	553324	-100.00000	-100.00000	-100.00000	0.08876	False
DYSPNOEA EXERTIONAL	116	27	27	53872	89	553235	3.11439	2.02484	4.79022	0.00000	True
DYSPRAXIA	15	2	2	53897	13	553311	1.57938	0.35641	6.99874	0.38961	False
DYSSTASIA	838	129	129	53770	709	552615	1.86785	1.54865	2.25284	0.00000	True
DYSTHYMIC DISORDER	2	1	1	53898	1	553323	10.26594	0.64210	164.13287	0.16965	False
DYSTONIA	144	14	14	53885	130	553194	1.10556	0.63706	1.91861	0.66093	False
DYSURIA	500	62	62	53837	438	552886	1.45317	1.11398	1.89564	0.00740	True
EAR CANAL ERYTHEMA	1	1	1	53898	0	553324	-100.00000	-100.00000	-100.00000	0.08876	False
EAR CONGESTION	62	19	19	53880	43	553281	4.53611	2.64378	7.78293	0.00000	True
EAR DISCOMFORT	291	47	47	53852	244	553080	1.97746	1.44733	2.70176	0.00007	True
EAR DISORDER	502	39	39	53860	463	552861	0.86473	0.62374	1.19883	0.43219	False
EAR HAEMORRHAGE	17	3	3	53896	14	553310	2.19984	0.63220	7.65474	0.18729	False
EAR INFECTION	527	44	44	53855	483	552841	0.93520	0.68694	1.27319	0.75901	False
EAR INFECTION BACTERIAL	2	2	2	53897	0	553324	-100.00000	-100.00000	-100.00000	0.00788	True
EAR INFECTION STAPHYLOCOCCAL	1	1	1	53898	0	553324	-100.00000	-100.00000	-100.00000	0.08876	False
EAR INFECTION VIRAL	5	1	1	53898	4	553320	2.56649	0.28685	22.96259	0.37172	False
EAR LOBE INFECTION	1	1	1	53898	0	553324	-100.00000	-100.00000	-100.00000	0.08876	False
EAR MALFORMATION	3	1	1	53898	2	553322	5.13297	0.46543	56.60902	0.24335	False
EAR PAIN	1370	215	215	53684	1155	552169	1.91098	1.65252	2.20985	0.00000	True
EAR PRURITUS	19	6	6	53893	13	553311	4.73813	1.80097	12.46539	0.00480	True
EAR SWELLING	89	11	11	53888	78	553246	1.44776	0.77014	2.72159	0.25954	False
EAR TUBE INSERTION	32	6	6	53893	26	553298	2.36906	0.97515	5.75550	0.05964	False
EAR, NOSE AND THROAT EXAMINATION	36	8	8	53891	28	553296	2.93313	1.33692	6.43510	0.01214	True
EAR, NOSE AND THROAT EXAMINATION ABNORMAL	19	2	2	53897	17	553307	1.20776	0.27904	5.22747	0.68352	False
EAR, NOSE AND THROAT EXAMINATION NORMAL	90	5	5	53894	85	553239	0.60388	0.24505	1.48814	0.35311	False
EATING DISORDER	231	25	25	53874	206	553118	1.24587	0.82269	1.88673	0.29676	False
ECCHYMOSIS	1490	154	154	53745	1336	551988	1.18335	1.00179	1.39782	0.04982	True
ECG SIGNS OF VENTRICULAR HYPERTROPHY	2	1	1	53898	1	553323	10.26594	0.64210	164.13287	0.16965	False
ECHOCARDIOGRAM	409	80	80	53819	329	552995	2.49628	1.95547	3.18665	0.00000	True
ECHOCARDIOGRAM ABNORMAL	326	41	41	53858	285	553039	1.47685	1.06466	2.04864	0.02448	True
ECHOCARDIOGRAM NORMAL	586	57	57	53842	529	552795	1.10616	0.84181	1.45352	0.46707	False
ECHOGRAPHY ABNORMAL	54	1	1	53898	53	553271	0.19370	0.02679	1.40063	0.08838	False
ECHOGRAPHY NORMAL	38	3	3	53896	35	553289	0.87994	0.27064	2.86100	1.00000	False
ECHOVIRUS TEST NEGATIVE	9	1	1	53898	8	553316	1.28324	0.16050	10.26013	0.56681	False
ECZEMA	845	64	64	53835	781	552543	0.84126	0.65211	1.08527	0.20336	False
ECZEMA HERPETICUM	4	2	2	53897	2	553322	10.26594	1.44607	72.87982	0.04186	True
ECZEMA IMPETIGINOUS	3	1	1	53898	2	553322	5.13297	0.46543	56.60902	0.24335	False
ECZEMA INFECTED	5	1	1	53898	4	553320	2.56649	0.28685	22.96259	0.37172	False
ECZEMA NUMMULAR	7	1	1	53898	6	553318	1.71099	0.20599	14.21213	0.47830	False
EDUCATIONAL PROBLEM	49	3	3	53896	46	553278	0.66952	0.20824	2.15264	0.79935	False
EFFUSION	26	3	3	53896	23	553301	1.33904	0.40206	4.45962	0.49895	False
EGFR STATUS ASSAY	3	1	1	53898	2	553322	5.13297	0.46543	56.60902	0.24335	False
EHLERS-DANLOS SYNDROME	4	2	2	53897	2	553322	10.26594	1.44607	72.87982	0.04186	True
EHRLICHIA SEROLOGY	8	1	1	53898	7	553317	1.46656	0.18043	11.92016	0.52461	False
EHRLICHIA TEST	16	2	2	53897	14	553310	1.46656	0.33331	6.45281	0.64777	False
EJECTION FRACTION	13	2	2	53897	11	553313	1.86653	0.41372	8.42094	0.32309	False
EJECTION FRACTION ABNORMAL	2	1	1	53898	1	553323	10.26594	0.64210	164.13287	0.16965	False
EJECTION FRACTION DECREASED	64	15	15	53884	49	553275	3.14264	1.76255	5.60332	0.00039	True
EJECTION FRACTION NORMAL	26	6	6	53893	20	553304	3.07978	1.23685	7.66870	0.02382	True
ELBOW OPERATION	1	1	1	53898	0	553324	-100.00000	-100.00000	-100.00000	0.08876	False
ELECTROCARDIOGRAM	1379	268	268	53631	1111	552213	2.47639	2.16779	2.82892	0.00000	True
ELECTROCARDIOGRAM ABNORMAL	791	101	101	53798	690	552634	1.50270	1.21974	1.85130	0.00027	True
ELECTROCARDIOGRAM AMBULATORY	77	13	13	53886	64	553260	2.08527	1.14878	3.78520	0.02424	True
ELECTROCARDIOGRAM AMBULATORY ABNORMAL	29	6	6	53893	23	553301	2.67807	1.09051	6.57680	0.03916	True
ELECTROCARDIOGRAM AMBULATORY NORMAL	58	4	4	53895	54	553270	0.76044	0.27542	2.09961	0.81689	False
ELECTROCARDIOGRAM CHANGE	9	1	1	53898	8	553316	1.28324	0.16050	10.26013	0.56681	False
ELECTROCARDIOGRAM NORMAL	1757	242	242	53657	1515	551809	1.63984	1.43219	1.87760	0.00000	True
ELECTROCARDIOGRAM P WAVE ABNORMAL	4	2	2	53897	2	553322	10.26594	1.44607	72.87982	0.04186	True
ELECTROCARDIOGRAM P WAVE NORMAL	3	1	1	53898	2	553322	5.13297	0.46543	56.60902	0.24335	False
ELECTROCARDIOGRAM PACEMAKER SPIKE	1	1	1	53898	0	553324	-100.00000	-100.00000	-100.00000	0.08876	False
ELECTROCARDIOGRAM PR INTERVAL	11	3	3	53896	8	553316	3.84973	1.02133	14.51089	0.06715	False
ELECTROCARDIOGRAM PR PROLONGATION	1	1	1	53898	0	553324	-100.00000	-100.00000	-100.00000	0.08876	False
ELECTROCARDIOGRAM QRS COMPLEX NORMAL	8	3	3	53896	5	553319	6.15957	1.47204	25.77385	0.02785	True
ELECTROCARDIOGRAM QT INTERVAL NORMAL	8	2	2	53897	6	553318	3.42198	0.69067	16.95442	0.15415	False
ELECTROCARDIOGRAM QT PROLONGED	30	8	8	53891	22	553302	3.73307	1.66208	8.38455	0.00378	True
ELECTROCARDIOGRAM REPOLARISATION ABNORMALITY	9	3	3	53896	6	553318	5.13297	1.28375	20.52381	0.03906	True
ELECTROCARDIOGRAM ST-T CHANGE	11	2	2	53897	9	553315	2.28132	0.49291	10.55850	0.25487	False
ELECTROCARDIOGRAM ST SEGMENT ABNORMAL	6	2	2	53897	4	553320	5.13297	0.94016	28.02428	0.09287	False
ELECTROCARDIOGRAM ST SEGMENT DEPRESSION	16	4	4	53895	12	553312	3.42198	1.10368	10.60994	0.04747	True
ELECTROCARDIOGRAM ST SEGMENT ELEVATION	88	8	8	53891	80	553244	1.02659	0.49634	2.12332	0.85194	False
ELECTROCARDIOGRAM ST SEGMENT NORMAL	7	1	1	53898	6	553318	1.71099	0.20599	14.21213	0.47830	False
ELECTROCARDIOGRAM T WAVE ABNORMAL	13	7	7	53892	6	553318	11.97693	4.02520	35.63720	0.00005	True
ELECTROCARDIOGRAM T WAVE AMPLITUDE DECREASED	7	1	1	53898	6	553318	1.71099	0.20599	14.21213	0.47830	False
ELECTROCARDIOGRAM T WAVE INVERSION	25	3	3	53896	22	553302	1.39990	0.41901	4.67704	0.48291	False
ELECTROCAUTERISATION	5	3	3	53896	2	553322	15.39891	2.57305	92.15778	0.00610	True
ELECTROCOCHLEOGRAM	1	1	1	53898	0	553324	-100.00000	-100.00000	-100.00000	0.08876	False
ELECTROCONVULSIVE THERAPY	4	2	2	53897	2	553322	10.26594	1.44607	72.87982	0.04186	True
ELECTROENCEPHALOGRAM	1011	79	79	53820	932	552392	0.87018	0.69173	1.09467	0.24547	False
ELECTROENCEPHALOGRAM ABNORMAL	1373	86	86	53813	1287	552037	0.68599	0.55156	0.85319	0.00043	True
ELECTROENCEPHALOGRAM NORMAL	1578	86	86	53813	1492	551832	0.59174	0.47622	0.73527	0.00000	True
ELECTROLYTE IMBALANCE	55	9	9	53890	46	553278	2.00855	0.98322	4.10314	0.05798	False
ELECTROMYOGRAM	409	99	99	53800	310	553014	3.27848	2.61506	4.11020	0.00000	True
ELECTROMYOGRAM ABNORMAL	553	110	110	53789	443	552881	2.54911	2.06914	3.14040	0.00000	True
ELECTROMYOGRAM NORMAL	279	40	40	53859	239	553085	1.71815	1.22941	2.40119	0.00294	True
ELECTRONEUROGRAPHY	88	13	13	53886	75	553249	1.77943	0.98760	3.20613	0.05966	False
ELECTRONEUROMYOGRAPHY	29	6	6	53893	23	553301	2.67807	1.09051	6.57680	0.03916	True
ELECTRONYSTAGMOGRAM	13	3	3	53896	10	553314	3.07978	0.84760	11.19043	0.10203	False
ELECTROPHORESIS	4	2	2	53897	2	553322	10.26594	1.44607	72.87982	0.04186	True
ELECTROPHORESIS ABNORMAL	13	3	3	53896	10	553314	3.07978	0.84760	11.19043	0.10203	False
ELECTROPHORESIS NORMAL	17	3	3	53896	14	553310	2.19984	0.63220	7.65474	0.18729	False
ELECTROPHORESIS PROTEIN	39	8	8	53891	31	553293	2.64928	1.21785	5.76318	0.01948	True
ELECTROPHORESIS PROTEIN ABNORMAL	19	2	2	53897	17	553307	1.20776	0.27904	5.22747	0.68352	False
ELECTROPHORESIS PROTEIN NORMAL	67	17	17	53882	50	553274	3.49042	2.01338	6.05105	0.00006	True
EMBOLISM	11	2	2	53897	9	553315	2.28132	0.49291	10.55850	0.25487	False
EMBOLISM ARTERIAL	1	1	1	53898	0	553324	-100.00000	-100.00000	-100.00000	0.08876	False
EMERGENCY CARE	4	1	1	53898	3	553321	3.42198	0.35595	32.89811	0.31052	False
EMERGENCY CARE EXAMINATION	2	1	1	53898	1	553323	10.26594	0.64210	164.13287	0.16965	False
EMOTIONAL DISORDER	183	11	11	53888	172	553152	0.65654	0.35691	1.20772	0.19425	False
EMOTIONAL DISTRESS	589	32	32	53867	557	552767	0.58978	0.41305	0.84214	0.00227	True
EMPHYSEMA	55	15	15	53884	40	553284	3.84973	2.12686	6.96819	0.00006	True
ENCEPHALITIS	1316	80	80	53819	1236	552088	0.66446	0.53008	0.83291	0.00022	True
ENCEPHALITIS BRAIN STEM	17	1	1	53898	16	553308	0.64162	0.08509	4.83821	1.00000	False
ENCEPHALITIS POST IMMUNISATION	35	1	1	53898	34	553290	0.30194	0.04133	2.20575	0.36585	False
ENCEPHALITIS VIRAL	61	4	4	53895	57	553267	0.72042	0.26140	1.98544	0.65658	False
ENCEPHALOMALACIA	9	4	4	53895	5	553319	8.21275	2.20540	30.58368	0.00542	True
ENCEPHALOMYELITIS	50	1	1	53898	49	553275	0.20951	0.02893	1.51724	0.12835	False
ENCEPHALOPATHY	675	60	60	53839	615	552709	1.00156	0.76844	1.30538	1.00000	False
ENCOPRESIS	8	1	1	53898	7	553317	1.46656	0.18043	11.92016	0.52461	False
END STAGE RENAL DISEASE	1	1	1	53898	0	553324	-100.00000	-100.00000	-100.00000	0.08876	False
ENDOCARDITIS	34	6	6	53893	28	553296	2.19984	0.91091	5.31261	0.11865	False
ENDOCARDITIS ENTEROCOCCAL	2	1	1	53898	1	553323	10.26594	0.64210	164.13287	0.16965	False
ENDOCARDITIS STAPHYLOCOCCAL	1	1	1	53898	0	553324	-100.00000	-100.00000	-100.00000	0.08876	False
ENDOCARDITIS VIRAL	1	1	1	53898	0	553324	-100.00000	-100.00000	-100.00000	0.08876	False
ENDOCRINE DISORDER	34	2	2	53897	32	553292	0.64162	0.15377	2.67727	0.76543	False
ENDOCRINE TEST	11	1	1	53898	10	553314	1.02659	0.13141	8.01964	1.00000	False
ENDOCRINE TEST ABNORMAL	4	2	2	53897	2	553322	10.26594	1.44607	72.87982	0.04186	True
ENDOMETRIAL DISORDER	7	3	3	53896	4	553320	7.69946	1.72323	34.40144	0.01862	True
ENDOMETRIOSIS	28	3	3	53896	25	553299	1.23191	0.37196	4.08008	0.73431	False
ENDOSCOPIC RETROGRADE CHOLANGIOPANCREATOGRAPHY ABNORMAL	1	1	1	53898	0	553324	-100.00000	-100.00000	-100.00000	0.08876	False
ENDOSCOPIC RETROGRADE CHOLANGIOPANCREATOGRAPHY NORMAL	3	2	2	53897	1	553323	20.53188	1.86171	226.43607	0.02224	True
ENDOSCOPIC ULTRASOUND ABNORMAL	1	1	1	53898	0	553324	-100.00000	-100.00000	-100.00000	0.08876	False
ENDOSCOPY	92	14	14	53885	78	553246	1.84260	1.04325	3.25442	0.04185	True
ENDOSCOPY ABNORMAL	46	9	9	53890	37	553287	2.49712	1.20529	5.17354	0.01836	True
ENDOSCOPY GASTROINTESTINAL	11	2	2	53897	9	553315	2.28132	0.49291	10.55850	0.25487	False
ENDOSCOPY GASTROINTESTINAL ABNORMAL	3	1	1	53898	2	553322	5.13297	0.46543	56.60902	0.24335	False
ENDOSCOPY GASTROINTESTINAL NORMAL	9	1	1	53898	8	553316	1.28324	0.16050	10.26013	0.56681	False
ENDOSCOPY NORMAL	43	6	6	53893	37	553287	1.66475	0.70265	3.94416	0.27380	False
ENDOSCOPY UPPER GASTROINTESTINAL TRACT	36	1	1	53898	35	553289	0.29331	0.04018	2.14099	0.37032	False
ENDOSCOPY UPPER GASTROINTESTINAL TRACT ABNORMAL	26	4	4	53895	22	553302	1.86653	0.64323	5.41633	0.28457	False
ENDOSCOPY UPPER GASTROINTESTINAL TRACT NORMAL	17	2	2	53897	15	553309	1.36879	0.31302	5.98548	0.65898	False
ENDOTRACHEAL INTUBATION	550	99	99	53800	451	552873	2.25350	1.81326	2.80062	0.00000	True
ENDOTRACHEAL INTUBATION COMPLICATION	8	1	1	53898	7	553317	1.46656	0.18043	11.92016	0.52461	False
ENEMA ADMINISTRATION	570	12	12	53887	558	552766	0.22077	0.12463	0.39108	0.00000	True
ENERGY INCREASED	4	2	2	53897	2	553322	10.26594	1.44607	72.87982	0.04186	True
ENLARGED UVULA	21	4	4	53895	17	553307	2.41552	0.81281	7.17847	0.11008	False
ENTERITIS	105	3	3	53896	102	553222	0.30194	0.09579	0.95177	0.02472	True
ENTEROBACTER TEST POSITIVE	8	1	1	53898	7	553317	1.46656	0.18043	11.92016	0.52461	False
ENTEROCOCCAL BACTERAEMIA	2	1	1	53898	1	553323	10.26594	0.64210	164.13287	0.16965	False
ENTEROCOCCAL INFECTION	9	2	2	53897	7	553317	2.93313	0.60933	14.11926	0.18703	False
ENTEROCOCCUS TEST POSITIVE	13	4	4	53895	9	553315	4.56264	1.40512	14.81562	0.02308	True
ENTEROCOLITIS	63	1	1	53898	62	553262	0.16558	0.02296	1.19413	0.04240	True
ENTEROVIRUS INFECTION	26	1	1	53898	25	553299	0.41064	0.05564	3.03057	0.72489	False
ENTEROVIRUS SEROLOGY TEST	3	1	1	53898	2	553322	5.13297	0.46543	56.60902	0.24335	False
ENTEROVIRUS SEROLOGY TEST NEGATIVE	25	2	2	53897	23	553301	0.89269	0.21047	3.78630	1.00000	False
ENTEROVIRUS TEST	13	1	1	53898	12	553312	0.85550	0.11124	6.57937	1.00000	False
ENTEROVIRUS TEST NEGATIVE	149	6	6	53893	143	553181	0.43074	0.19033	0.97480	0.04177	True
ENTEROVIRUS TEST POSITIVE	28	4	4	53895	24	553300	1.71099	0.59368	4.93107	0.30797	False
ENTHESOPATHY	3	1	1	53898	2	553322	5.13297	0.46543	56.60902	0.24335	False
ENURESIS	83	8	8	53891	75	553249	1.09503	0.52827	2.26986	0.70203	False
ENZYME ABNORMALITY	91	11	11	53888	80	553244	1.41157	0.75162	2.65096	0.26776	False
ENZYME LEVEL TEST	7	1	1	53898	6	553318	1.71099	0.20599	14.21213	0.47830	False
EOSINOPHIL COUNT	43	7	7	53892	36	553288	1.99616	0.88837	4.48533	0.10117	False
EOSINOPHIL COUNT ABNORMAL	3	1	1	53898	2	553322	5.13297	0.46543	56.60902	0.24335	False
EOSINOPHIL COUNT DECREASED	74	14	14	53885	60	553264	2.39539	1.33893	4.28543	0.00622	True
EOSINOPHIL COUNT INCREASED	153	25	25	53874	128	553196	2.00507	1.30629	3.07763	0.00260	True
EOSINOPHIL COUNT NORMAL	164	28	28	53871	136	553188	2.11358	1.40737	3.17414	0.00080	True
EOSINOPHIL PERCENTAGE	187	22	22	53877	165	553159	1.36879	0.87736	2.13550	0.15791	False
EOSINOPHIL PERCENTAGE DECREASED	114	9	9	53890	105	553219	0.87994	0.44548	1.73811	0.86911	False
EOSINOPHIL PERCENTAGE INCREASED	150	17	17	53882	133	553191	1.31219	0.79210	2.17375	0.31229	False
EOSINOPHILIA	207	23	23	53876	184	553140	1.28324	0.83194	1.97937	0.26959	False
EOSINOPHILIA MYALGIA SYNDROME	2	1	1	53898	1	553323	10.26594	0.64210	164.13287	0.16965	False
EOSINOPHILIC CELLULITIS	10	1	1	53898	9	553315	1.14066	0.14451	9.00347	0.60526	False
EOSINOPHILIC MYOCARDITIS	9	1	1	53898	8	553316	1.28324	0.16050	10.26013	0.56681	False
EPHELIDES	8	2	2	53897	6	553318	3.42198	0.69067	16.95442	0.15415	False
EPICONDYLITIS	23	6	6	53893	17	553307	3.62327	1.42860	9.18947	0.01313	True
EPIDERMAL GROWTH FACTOR RECEPTOR DECREASED	1	1	1	53898	0	553324	-100.00000	-100.00000	-100.00000	0.08876	False
EPIDERMAL NECROSIS	21	4	4	53895	17	553307	2.41552	0.81281	7.17847	0.11008	False
EPIDIDYMITIS	34	2	2	53897	32	553292	0.64162	0.15377	2.67727	0.76543	False
EPIDURAL BLOOD PATCH	4	1	1	53898	3	553321	3.42198	0.35595	32.89811	0.31052	False
EPIDURAL INJECTION	3	1	1	53898	2	553322	5.13297	0.46543	56.60902	0.24335	False
EPIGASTRIC DISCOMFORT	14	3	3	53896	11	553313	2.79980	0.78111	10.03564	0.12166	False
EPIGLOTTITIS	46	3	3	53896	43	553281	0.71623	0.22221	2.30857	0.79576	False
EPILEPSY	868	60	60	53839	808	552516	0.76232	0.58655	0.99077	0.04211	True
EPISCLERITIS	8	1	1	53898	7	553317	1.46656	0.18043	11.92016	0.52461	False
EPISIOTOMY	7	1	1	53898	6	553318	1.71099	0.20599	14.21213	0.47830	False
EPISTAXIS	970	83	83	53816	887	552437	0.96062	0.76722	1.20278	0.77757	False
EPSTEIN-BARR VIRUS ANTIBODY	26	6	6	53893	20	553304	3.07978	1.23685	7.66870	0.02382	True
EPSTEIN-BARR VIRUS ANTIBODY NEGATIVE	185	18	18	53881	167	553157	1.10651	0.68049	1.79924	0.69715	False
EPSTEIN-BARR VIRUS ANTIBODY POSITIVE	126	12	12	53887	114	553210	1.08063	0.59617	1.95876	0.75380	False
EPSTEIN-BARR VIRUS ANTIGEN POSITIVE	17	1	1	53898	16	553308	0.64162	0.08509	4.83821	1.00000	False
EPSTEIN-BARR VIRUS INFECTION	64	5	5	53894	59	553265	0.87000	0.34919	2.16759	1.00000	False
EPSTEIN-BARR VIRUS TEST	72	7	7	53892	65	553259	1.10556	0.50698	2.41086	0.68230	False
EPSTEIN-BARR VIRUS TEST NEGATIVE	268	30	30	53869	238	553086	1.29403	0.88527	1.89153	0.19592	False
EPSTEIN-BARR VIRUS TEST POSITIVE	62	5	5	53894	57	553267	0.90052	0.36099	2.24645	1.00000	False
ERECTILE DYSFUNCTION	99	8	8	53891	91	553233	0.90250	0.43810	1.85919	1.00000	False
EROSIVE OESOPHAGITIS	1	1	1	53898	0	553324	-100.00000	-100.00000	-100.00000	0.08876	False
ERUCTATION	124	18	18	53881	106	553218	1.74327	1.05779	2.87298	0.03801	True
ERYSIPELAS	146	16	16	53883	130	553194	1.26350	0.75178	2.12355	0.38054	False
ERYTHEMA	39648	5822	5822	48077	33826	519498	1.76693	1.72095	1.81414	0.00000	True
ERYTHEMA AB IGNE	1	1	1	53898	0	553324	-100.00000	-100.00000	-100.00000	0.08876	False
ERYTHEMA ANNULARE	8	1	1	53898	7	553317	1.46656	0.18043	11.92016	0.52461	False
ERYTHEMA INDURATUM	42	4	4	53895	38	553286	1.08063	0.38569	3.02766	0.78607	False
ERYTHEMA INFECTIOSUM	18	1	1	53898	17	553307	0.60388	0.08036	4.53771	1.00000	False
ERYTHEMA MULTIFORME	1487	155	155	53744	1332	551992	1.19461	1.01179	1.41047	0.03979	True
ERYTHEMA NODOSUM	200	17	17	53882	183	553141	0.95367	0.58024	1.56743	1.00000	False
ERYTHEMA OF EYELID	87	8	8	53891	79	553245	1.03959	0.50242	2.15110	0.85044	False
ERYTHEMA TOXICUM NEONATORUM	3	1	1	53898	2	553322	5.13297	0.46543	56.60902	0.24335	False
ERYTHROBLAST COUNT	2	1	1	53898	1	553323	10.26594	0.64210	164.13287	0.16965	False
ERYTHRODERMIC PSORIASIS	3	2	2	53897	1	553323	20.53188	1.86171	226.43607	0.02224	True
ESCHAR	25	5	5	53894	20	553304	2.56649	0.96327	6.83802	0.06539	False
ESCHERICHIA INFECTION	58	6	6	53893	52	553272	1.18453	0.50881	2.75763	0.64284	False
ESCHERICHIA TEST NEGATIVE	24	1	1	53898	23	553301	0.44635	0.06028	3.30512	0.71863	False
ESCHERICHIA TEST POSITIVE	83	7	7	53892	76	553248	0.94555	0.43600	2.05060	1.00000	False
ESSENTIAL HYPERTENSION	10	4	4	53895	6	553318	6.84396	1.93136	24.25227	0.00841	True
ESSENTIAL TREMOR	9	4	4	53895	5	553319	8.21275	2.20540	30.58368	0.00542	True
ETHMOID SINUS SURGERY	1	1	1	53898	0	553324	-100.00000	-100.00000	-100.00000	0.08876	False
EUPHORIC MOOD	52	6	6	53893	46	553278	1.33904	0.57192	3.13509	0.46204	False
EUSTACHIAN TUBE DYSFUNCTION	7	2	2	53897	5	553319	4.10638	0.79669	21.16547	0.12257	False
EUSTACHIAN TUBE OBSTRUCTION	3	1	1	53898	2	553322	5.13297	0.46543	56.60902	0.24335	False
EUTHYROID SICK SYNDROME	2	1	1	53898	1	553323	10.26594	0.64210	164.13287	0.16965	False
EVANS SYNDROME	13	1	1	53898	12	553312	0.85550	0.11124	6.57937	1.00000	False
EX-TOBACCO USER	2	1	1	53898	1	553323	10.26594	0.64210	164.13287	0.16965	False
EXAGGERATED STARTLE RESPONSE	32	2	2	53897	30	553294	0.68440	0.16356	2.86376	1.00000	False
EXCESSIVE CERUMEN PRODUCTION	4	1	1	53898	3	553321	3.42198	0.35595	32.89811	0.31052	False
EXCESSIVE EYE BLINKING	129	5	5	53894	124	553200	0.41395	0.16931	1.01205	0.04341	True
EXCESSIVE GRANULATION TISSUE	6	2	2	53897	4	553320	5.13297	0.94016	28.02428	0.09287	False
EXCORIATION	165	25	25	53874	140	553184	1.83320	1.19793	2.80537	0.00852	True
EXECUTIVE DYSFUNCTION	7	2	2	53897	5	553319	4.10638	0.79669	21.16547	0.12257	False
EXERCISE ELECTROCARDIOGRAM	18	2	2	53897	16	553308	1.28324	0.29506	5.58098	0.67097	False
EXERCISE ELECTROCARDIOGRAM ABNORMAL	2	1	1	53898	1	553323	10.26594	0.64210	164.13287	0.16965	False
EXERCISE ELECTROCARDIOGRAM NORMAL	13	1	1	53898	12	553312	0.85550	0.11124	6.57937	1.00000	False
EXERCISE LACK OF	2	2	2	53897	0	553324	-100.00000	-100.00000	-100.00000	0.00788	True
EXERCISE TEST	4	1	1	53898	3	553321	3.42198	0.35595	32.89811	0.31052	False
EXERCISE TEST NORMAL	8	1	1	53898	7	553317	1.46656	0.18043	11.92016	0.52461	False
EXERCISE TOLERANCE DECREASED	100	14	14	53885	86	553238	1.67120	0.95004	2.93978	0.07780	False
EXERTIONAL HEADACHE	3	1	1	53898	2	553322	5.13297	0.46543	56.60902	0.24335	False
EXFOLIATIVE RASH	66	9	9	53890	57	553267	1.62094	0.80255	3.27387	0.18869	False
EXOCRINE PANCREATIC FUNCTION TEST ABNORMAL	2	1	1	53898	1	553323	10.26594	0.64210	164.13287	0.16965	False
EXOPHTHALMOS	32	5	5	53894	27	553297	1.90110	0.73214	4.93645	0.20091	False
EXOSTOSIS	22	5	5	53894	17	553307	3.01939	1.11399	8.18384	0.04036	True
EXPIRED DRUG ADMINISTERED	4149	36	36	53863	4113	549211	0.08986	0.06473	0.12473	0.00000	True
EXPIRED PRODUCT ADMINISTERED	3021	26	26	53873	2995	550329	0.08912	0.06058	0.13110	0.00000	True
EXPLORATIVE LAPAROTOMY	36	1	1	53898	35	553289	0.29331	0.04018	2.14099	0.37032	False
EXPLORATORY OPERATION	9	1	1	53898	8	553316	1.28324	0.16050	10.26013	0.56681	False
EXPOSURE DURING BREAST FEEDING	50	3	3	53896	47	553277	0.65527	0.20396	2.10523	0.62316	False
EXPOSURE DURING PREGNANCY	2023	78	78	53821	1945	551379	0.41169	0.32836	0.51617	0.00000	True
EXPOSURE TO CHEMICAL POLLUTION	3	1	1	53898	2	553322	5.13297	0.46543	56.60902	0.24335	False
EXPOSURE TO COMMUNICABLE DISEASE	162	14	14	53885	148	553176	0.97110	0.56141	1.67976	1.00000	False
EXPOSURE TO VACCINATED PERSON	64	1	1	53898	63	553261	0.16295	0.02260	1.17489	0.04334	True
EXPRESSIVE LANGUAGE DISORDER	29	3	3	53896	26	553298	1.18453	0.35853	3.91347	0.73996	False
EXTENSIVE SWELLING OF VACCINATED LIMB	357	18	18	53881	339	552985	0.54509	0.33933	0.87564	0.00886	True
EXTENSOR PLANTAR RESPONSE	137	17	17	53882	120	553204	1.45434	0.87521	2.41670	0.17322	False
EXTERNAL EAR INFLAMMATION	4	1	1	53898	3	553321	3.42198	0.35595	32.89811	0.31052	False
EXTERNAL EAR PAIN	7	4	4	53895	3	553321	13.68792	3.06352	61.15811	0.00174	True
EXTRA DOSE ADMINISTERED	1538	39	39	53860	1499	551825	0.26709	0.19438	0.36701	0.00000	True
EXTRACORPOREAL MEMBRANE OXYGENATION	12	3	3	53896	9	553315	3.42198	0.92643	12.63987	0.08381	False
EXTRAOCULAR MUSCLE DISORDER	7	1	1	53898	6	553318	1.71099	0.20599	14.21213	0.47830	False
EXTRAOCULAR MUSCLE PARESIS	15	3	3	53896	12	553312	2.56649	0.72426	9.09460	0.14252	False
EXTRAPYRAMIDAL DISORDER	46	4	4	53895	42	553282	0.97771	0.35060	2.72651	1.00000	False
EXTRASYSTOLES	66	10	10	53889	56	553268	1.83320	0.93543	3.59262	0.08131	False
EXTREMITY CONTRACTURE	24	4	4	53895	20	553304	2.05319	0.70180	6.00681	0.15905	False
EXTUBATION	46	3	3	53896	43	553281	0.71623	0.22221	2.30857	0.79576	False
EYE ALLERGY	6	1	1	53898	5	553319	2.05319	0.23987	17.57448	0.42749	False
EYE BURNS	31	8	8	53891	23	553301	3.57076	1.59732	7.98236	0.00471	True
EYE COLOUR CHANGE	6	1	1	53898	5	553319	2.05319	0.23987	17.57448	0.42749	False
EYE DISCHARGE	600	81	81	53818	519	552805	1.60220	1.26793	2.02459	0.00017	True
EYE DISORDER	1079	83	83	53816	996	552328	0.85550	0.68398	1.07002	0.18049	False
EYE HAEMORRHAGE	84	7	7	53892	77	553247	0.93327	0.43052	2.02311	1.00000	False
EYE INFECTION	71	12	12	53887	59	553265	2.08799	1.12253	3.88382	0.03262	True
EYE INFECTION STAPHYLOCOCCAL	1	1	1	53898	0	553324	-100.00000	-100.00000	-100.00000	0.08876	False
EYE INFECTION VIRAL	3	2	2	53897	1	553323	20.53188	1.86171	226.43607	0.02224	True
EYE INFLAMMATION	117	13	13	53886	104	553220	1.28324	0.72099	2.28394	0.41345	False
EYE IRRITATION	728	101	101	53798	627	552697	1.65368	1.34050	2.04004	0.00001	True
EYE MOVEMENT DISORDER	1360	77	77	53822	1283	552041	0.61612	0.48962	0.77529	0.00001	True
EYE OEDEMA	285	32	32	53867	253	553071	1.29846	0.89901	1.87538	0.17437	False
EYE OPERATION	12	1	1	53898	11	553313	0.93327	0.12049	7.22878	1.00000	False
EYE PAIN	1472	208	208	53691	1264	552060	1.68933	1.45928	1.95565	0.00000	True
EYE PATCH APPLICATION	9	1	1	53898	8	553316	1.28324	0.16050	10.26013	0.56681	False
EYE PRURITUS	885	161	161	53738	724	552600	2.28290	1.92493	2.70743	0.00000	True
EYE ROLLING	192	7	7	53892	185	553139	0.38844	0.18264	0.82616	0.00731	True
EYE SWELLING	2260	298	298	53601	1962	551362	1.55925	1.38081	1.76075	0.00000	True
EYELID DISORDER	74	11	11	53888	63	553261	1.79247	0.94476	3.40080	0.09641	False
EYELID EROSION	1	1	1	53898	0	553324	-100.00000	-100.00000	-100.00000	0.08876	False
EYELID FUNCTION DISORDER	141	28	28	53871	113	553211	2.54377	1.68200	3.84707	0.00005	True
EYELID INFECTION	2	1	1	53898	1	553323	10.26594	0.64210	164.13287	0.16965	False
[truncated: 3,461 more rows]
