# Supplementary material for: Examining Socioeconomic and Computational Aspects of Vaccine Pharmacovigilance
Source: Biomed Res Int. 2019 Feb 19;2019:6576483. doi: 10.1155/2019/6576483 (PMC6399563; doi:10.1155/2019/6576483)
Supplement: Supplementary 3 — File name and format: Additional_File_3.txt. Title: Vaccine occurrence in VAEs. Description: Tab separated file listing the vaccination type code (vax_code), the number of VAE cases reporting this vaccine type (num_vaes_type), vaccination names reported in VAERS for each vaccine type (vax_name), and the number of VAEs that the respective vaccine name was reported in (num_vaes_name). [file 6576483.f3.zip › Additional_File_3.txt]

vax_code	num_vaes_type	vax_name	num_vaes_name
6VAX-F	2648	DTAP+IPV+HEPB+HIB (HEXAVAC)	66
6VAX-F	2648	DTAP+IPV+HEPB+HIB (INFANRIX HEXA)	2299
6VAX-F	2648	DTAP+IPV+HEPB+HIB (NO BRAND NAME)	284
ADEN	7	ADENOVIRUS (NO BRAND NAME)	2
ADEN	7	ADENOVIRUS (TYPE 4, NO BRAND NAME)	3
ADEN	7	ADENOVIRUS (TYPE 7, NO BRAND NAME)	5
ADEN_4_7	122	ADENOVIRUS TYPES 4 & 7, LIVE, ORAL (NO BRAND NAME)	122
ANTH	8590	ANTHRAX (BIOTHRAX)	5688
ANTH	8590	ANTHRAX (NO BRAND NAME)	2907
BCG	421	BCG (MYCOBAX)	59
BCG	421	BCG (NO BRAND NAME)	285
BCG	421	BCG (TICE)	77
CEE	6	FSME-IMMUN. (NO BRAND NAME)	6
CHOL	174	CHOLERA (NO BRAND NAME)	92
CHOL	174	CHOLERA (USP)	80
CHOL	174	CHOLERA (VAXCHORA)	2
DPIPV	2	DP + IPV (NO BRAND NAME)	2
DPP	216	DIPHTHERIA TOXOID + PERTUSSIS + IPV (NO BRAND NAME)	191
DPP	216	DIPHTHERIA TOXOID + PERTUSSIS + IPV (QUATRO VIRELON)	25
DT	2526	DT ADSORBED (DECAVAC)	240
DT	2526	DT ADSORBED (DITANRIX)	118
DT	2526	DT ADSORBED (NO BRAND NAME)	2168
DTAP	57454	DTAP (ACEL-IMUNE)	3375
DTAP	57454	DTAP (CERTIVA)	103
DTAP	57454	DTAP (DAPTACEL)	13619
DTAP	57454	DTAP (INFANRIX)	20703
DTAP	57454	DTAP (NO BRAND NAME)	5112
DTAP	57454	DTAP (TRIPEDIA)	14556
DTAPH	833	DTAP + HIB (NO BRAND NAME)	272
DTAPH	833	DTAP + HIB (TRIHIBIT)	561
DTAPHEPBIP	9325	DTAP + HEPB + IPV (INFANRIX PENTA)	35
DTAPHEPBIP	9325	DTAP + HEPB + IPV (NO BRAND NAME)	169
DTAPHEPBIP	9325	DTAP + HEPB + IPV (PEDIARIX)	9121
DTAPIPV	6439	DTAP + IPV (INFANRIX TETRA)	577
DTAPIPV	6439	DTAP + IPV (KINRIX)	5548
DTAPIPV	6439	DTAP + IPV (QUADRACEL)	20
DTAPIPV	6439	DTAP + IPV (UNKNOWN)	294
DTAPIPVHIB	7623	DTAP + IPV + HIB (INFANRIX QUINTA)	1181
DTAPIPVHIB	7623	DTAP + IPV + HIB (NO BRAND NAME)	381
DTAPIPVHIB	7623	DTAP + IPV + HIB (PENTACEL)	5789
DTAPIPVHIB	7623	DTAP + IPV + HIB (UNKNOWN)	272
DTIPV	236	DT + IPV (FOREIGN)	30
DTIPV	236	DT + IPV (NO BRAND NAME)	206
DTOX	109	DIPHTHERIA TOXOIDS (NO BRAND NAME)	109
DTP	22720	DTP (NO BRAND NAME)	14583
DTP	22720	DTP (TRI-IMMUNOL)	8137
DTP	22720	TD + PERTUSSIS (NO BRAND NAME)	1
DTPHEP	147	DTP + HEP B (NO BRAND NAME)	46
DTPHEP	147	DTP + HEP B (TRITANRIX)	101
DTPHIB	6267	DTP + HIB (DTP + ACTHIB)	107
DTPHIB	6267	DTP + HIB (NO BRAND NAME)	220
DTPHIB	6267	DTP + HIB (TETRAMUNE)	5940
DTPIHI	108	DT+IPV+HIB+HEPB (NO BRAND NAME)	108
DTPIPV	512	DTP + IPV (NO BRAND NAME)	512
DTPPHIB	162	DTP + IPV + ACT-HIB (NO BRAND NAME)	162
FLU(H1N1)	9145	INFLUENZA (H1N1) (H1N1 (MONOVALENT) (CSL))	501
FLU(H1N1)	9145	INFLUENZA (H1N1) (H1N1 (MONOVALENT) (GSK))	174
FLU(H1N1)	9145	INFLUENZA (H1N1) (H1N1 (MONOVALENT) (NOVARTIS))	3440
FLU(H1N1)	9145	INFLUENZA (H1N1) (H1N1 (MONOVALENT) (SANOFI))	5034
FLU3	86751	INFLUENZA (SEASONAL) (AFLURIA)	6594
FLU3	86751	INFLUENZA (SEASONAL) (AGRIFLU)	71
FLU3	86751	INFLUENZA (SEASONAL) (ENZIRA)	2
FLU3	86751	INFLUENZA (SEASONAL) (FLU-IMUNE)	305
FLU3	86751	INFLUENZA (SEASONAL) (FLUARIX)	5711
FLU3	86751	INFLUENZA (SEASONAL) (FLULAVAL)	3274
FLU3	86751	INFLUENZA (SEASONAL) (FLUOGEN)	1811
FLU3	86751	INFLUENZA (SEASONAL) (FLUSHIELD)	4258
FLU3	86751	INFLUENZA (SEASONAL) (FLUVIRIN)	17944
FLU3	86751	INFLUENZA (SEASONAL) (FLUZONE HIGH-DOSE)	9186
FLU3	86751	INFLUENZA (SEASONAL) (FLUZONE INTRADERMAL)	1167
FLU3	86751	INFLUENZA (SEASONAL) (FLUZONE)	36416
FLU3	86751	INFLUENZA (SEASONAL) (TIV DRESDEN)	35
FLU4	8768	INFLUENZA (SEASONAL) (AFLURIA QUADRIVALENT)	133
FLU4	8768	INFLUENZA (SEASONAL) (FLUARIX QUADRIVALENT)	3525
FLU4	8768	INFLUENZA (SEASONAL) (FLULAVAL QUADRIVALENT)	589
FLU4	8768	INFLUENZA (SEASONAL) (FLUZONE INTRADERMAL QUADRIVALENT)	122
FLU4	8768	INFLUENZA (SEASONAL) (FLUZONE QUADRIVALENT)	4395
FLU4	8768	INFLUENZA (SEASONAL) (QIV DRESDEN)	5
FLUA3	161	INFLUENZA (SEASONAL) (CHIROMAS)	1
FLUA3	161	INFLUENZA (SEASONAL) (FLUAD)	160
FLUC3	1048	INFLUENZA (SEASONAL) (FLUCELVAX)	982
FLUC3	1048	INFLUENZA (SEASONAL) (OPTAFLU)	66
FLUC4	370	INFLUENZA (SEASONAL) (FLUCELVAX QUADRIVALENT)	370
FLUN(H1N1)	2894	INFLUENZA (H1N1) (H1N1 (MONOVALENT) (MEDIMMUNE))	2894
FLUN3	6392	INFLUENZA (SEASONAL) (FLUMIST)	6392
FLUN4	3470	INFLUENZA (SEASONAL) (FLUENZ TETRA)	34
FLUN4	3470	INFLUENZA (SEASONAL) (FLUMIST QUADRIVALENT)	3436
FLUR3	131	INFLUENZA (SEASONAL) (FLUBLOK)	131
FLUX	21165	INFLUENZA (SEASONAL) (FOREIGN)	1046
FLUX	21165	INFLUENZA (SEASONAL) (NO BRAND NAME)	20119
FLUX(H1N1)	2629	INFLUENZA (H1N1) (H1N1 (MONOVALENT) (UNKNOWN))	2629
H5N1	5	INFLUENZA (SEASONAL) (PANDEMIC FLU VACCINE (H5N1))	5
HBHEPB	5573	HIB + HEP B (COMVAX)	5558
HBHEPB	5573	HIB + HEP B (NO BRAND NAME)	15
HBPV	261	HIB POLYSACCHARIDE (HIBIMUNE)	237
HBPV	261	HIB POLYSACCHARIDE (NO BRAND NAME)	24
HEP	61775	HEP B (ENGERIX-B)	29108
HEP	61775	HEP B (FOREIGN)	1753
HEP	61775	HEP B (GENHEVAC B)	131
HEP	61775	HEP B (NO BRAND NAME)	5040
HEP	61775	HEP B (RECOMBIVAX HB)	25793
HEPA	31599	HEP A (HAVRIX)	17766
HEPA	31599	HEP A (NO BRAND NAME)	2441
HEPA	31599	HEP A (VAQTA)	11397
HEPAB	4428	HEP A + HEP B (NO BRAND NAME)	154
HEPAB	4428	HEP A + HEP B (TWINRIX)	4274
HEPATYP	35	HEP A + TYP (HEPATYRIX)	35
HIBV	50068	HIB (ACTHIB)	18093
HIBV	50068	HIB (HIBERIX)	1811
HIBV	50068	HIB (HIBTITER)	14667
HIBV	50068	HIB (NO BRAND NAME)	3797
HIBV	50068	HIB (OMNIHIB)	59
HIBV	50068	HIB (PEDVAXHIB)	10192
HIBV	50068	HIB (PROHIBIT)	1469
HIBV	50068	HIB (TETRACOQ)	13
HIBV	50068	HIB POLYSACCHARIDE (FOREIGN)	11
HPV2	3579	HPV (CERVARIX)	3579
HPV4	41827	HPV (GARDASIL)	41827
HPV9	5337	HPV (GARDASIL 9)	5337
HPVX	1223	HPV (NO BRAND NAME)	1223
IPV	39422	POLIO VIRUS, INACT. (IPOL)	23272
IPV	39422	POLIO VIRUS, INACT. (NO BRAND NAME)	7024
IPV	39422	POLIO VIRUS, INACT. (POLIOVAX)	9134
JEV	558	JAPANESE ENCEPHALITIS (J-VAX)	216
JEV	558	JAPANESE ENCEPHALITIS (JE-VAX)	342
JEV1	286	JAPANESE ENCEPHALITIS (IXIARO)	286
JEVX	81	JAPANESE ENCEPHALITIS (NO BRAND NAME)	81
LYME	2223	LYME (LYMERIX)	2222
LYME	2223	LYME (NO BRAND NAME)	1
MEA	724	MEASLES (ATTENUVAX)	623
MEA	724	MEASLES (FOREIGN)	3
MEA	724	MEASLES (MORATEN)	1
MEA	724	MEASLES (NO BRAND NAME)	97
MEN	3446	MENINGOCOCCAL (MENOMUNE-A/C)	74
MEN	3446	MENINGOCOCCAL (MENOMUNE)	1454
MEN	3446	MENINGOCOCCAL (NO BRAND NAME)	1918
MENB	2967	MENINGOCOCCAL B (BEXSERO)	1766
MENB	2967	MENINGOCOCCAL B (TRUMENBA)	1202
MENHIB	88	MENINGICOCCAL CONJUGATE + HIB (MENITORIX)	50
MENHIB	88	MENINGICOCCAL CONJUGATE + HIB (UNKNOWN)	38
MER	200	MEASLES + RUBELLA (MR-VAX II)	170
MER	200	MEASLES + RUBELLA (NO BRAND NAME)	30
MM	115	MEASLES + MUMPS (MM-VAX)	98
MM	115	MEASLES + MUMPS (NO BRAND NAME)	17
MMR	74604	MEASLES + MUMPS + RUBELLA (MMR I)	491
MMR	74604	MEASLES + MUMPS + RUBELLA (MMR II)	67297
MMR	74604	MEASLES + MUMPS + RUBELLA (NO BRAND NAME)	4663
MMR	74604	MEASLES + MUMPS + RUBELLA (PRIORIX)	577
MMR	74604	MEASLES + MUMPS + RUBELLA (VIRIVAC)	1578
MMRV	9957	MEASLES + MUMPS + RUBELLA + VARICELLA (NO BRAND NAME)	385
MMRV	9957	MEASLES + MUMPS + RUBELLA + VARICELLA (PROQUAD)	9572
MNC	119	MENINGOCOCCAL (MENINGITEC)	119
MNQ	18646	MENINGOCOCCAL CONJUGATE (MENACTRA)	13963
MNQ	18646	MENINGOCOCCAL CONJUGATE (MENVEO)	4464
MNQ	18646	MENINGOCOCCAL CONJUGATE (NO BRAND NAME)	224
MNQHIB	15	MENINGICOCCAL C & Y + HIB (MENHIBRIX)	15
MU	190	MUMPS (MUMPSVAX I)	55
MU	190	MUMPS (MUMPSVAX II)	104
MU	190	MUMPS (NO BRAND NAME)	31
MUR	31	MUMPS + RUBELLA (FOREIGN)	27
MUR	31	MUMPS + RUBELLA (NO BRAND NAME)	4
OPV	24516	POLIO VIRUS, ORAL (NO BRAND NAME)	2100
OPV	24516	POLIO VIRUS, ORAL (ORIMUNE)	22416
PER	170	PERTUSSIS (NO BRAND NAME)	170
PLAGUE	27	PLAGUE (NO BRAND NAME)	16
PLAGUE	27	PLAGUE (USP)	11
PNC	27713	PNEUMO (PREVNAR)	27713
PNC10	243	PNEUMO (SYNFLORIX)	243
PNC13	21910	PNEUMO (PREVNAR13)	21910
PPV	48744	PNEUMO (NO BRAND NAME)	4586
PPV	48744	PNEUMO (PNEUMOVAX)	41176
PPV	48744	PNEUMO (PNU-IMUNE)	2982
RAB	4369	RABIES (IMOVAX ID)	306
RAB	4369	RABIES (IMOVAX)	1875
RAB	4369	RABIES (NO BRAND NAME)	565
RAB	4369	RABIES (RABAVERT)	1126
RAB	4369	RABIES (RABIE-VAX)	86
RAB	4369	RABIES (RABIPUR)	415
RAB	4369	RABIES (RABIVAC)	26
RUB	934	RUBELLA (MERUVAX I)	3
RUB	934	RUBELLA (MERUVAX II)	845
RUB	934	RUBELLA (NO BRAND NAME)	80
RUB	934	RUBELLA (RUDIVAX)	6
RV	699	ROTAVIRUS (ROTASHIELD)	699
RV1	4761	ROTAVIRUS (ROTARIX)	4761
RV5	16629	ROTAVIRUS (ROTATEQ)	16629
RVX	911	ROTAVIRUS (NO BRAND NAME)	911
SMALL	5416	SMALLPOX (ACAM2000)	1562
SMALL	5416	SMALLPOX (DRYVAX)	3366
SMALL	5416	SMALLPOX (NO BRAND NAME)	489
SSEV	12	SUMMER/SPRING ENCEPH (NO BRAND NAME)	12
TBE	96	TICK-BORNE ENCEPH (NO BRAND NAME)	96
TD	17628	TD ADSORBED (DITANRIX)	181
TD	17628	TD ADSORBED (NO BRAND NAME)	14850
TD	17628	TD ADSORBED (TD-RIX)	75
TD	17628	TETANUS DIPHTHERIA (NO BRAND NAME)	2207
TD	17628	TETANUS DIPHTHERIA (TENIVAC)	315
TDAP	30972	TDAP (ADACEL)	18680
TDAP	30972	TDAP (BOOSTRIX)	9948
TDAP	30972	TDAP (NO BRAND NAME)	2346
TDAPIPV	21	TDAP + IPV (FOREIGN)	21
TTOX	3299	TETANUS TOXOID (NO BRAND NAME)	2279
TTOX	3299	TETANUS TOXOID (TEVAX)	33
TTOX	3299	TETANUS TOXOID, ADSORBED (NO BRAND NAME)	988
TYP	7637	TYPHOID LIVE ORAL TY21A (NO BRAND NAME)	98
TYP	7637	TYPHOID LIVE ORAL TY21A (VIVOTIF)	1587
TYP	7637	TYPHOID VI POLYSACCHARIDE (ACETONE INACTIVATED DRIED)	167
TYP	7637	TYPHOID VI POLYSACCHARIDE (NO BRAND NAME)	1769
TYP	7637	TYPHOID VI POLYSACCHARIDE (TYPHIM VI)	4019
UNK	3225	VACCINE NOT SPECIFIED (NO BRAND NAME)	3225
VARCEL	70020	VARICELLA (NO BRAND NAME)	2425
VARCEL	70020	VARICELLA (VARILRIX)	240
VARCEL	70020	VARICELLA (VARIVAX)	67355
VARZOS	32775	ZOSTER (NO BRAND NAME)	891
VARZOS	32775	ZOSTER (ZOSTAVAX)	31884
YF	3595	YELLOW FEVER (NO BRAND NAME)	555
YF	3595	YELLOW FEVER (STAMARIL)	17
YF	3595	YELLOW FEVER (YF-VAX)	3023
