# Supplementary material for: Examining Socioeconomic and Computational Aspects of Vaccine Pharmacovigilance
Source: Biomed Res Int. 2019 Feb 19;2019:6576483. doi: 10.1155/2019/6576483 (PMC6399563; doi:10.1155/2019/6576483)
Supplement: Supplementary 4 — File name and format: Additional_File_4.txt. Title: Vaccine reaction profiles. Description: Tab separated file containing vaccine types (vax_type), number of VAEs that the vaccine type was mentioned in (num_vaes_vax_type), reaction names co-reported with the respective vaccine type (symptom_reaction_event), total number of cases that the reaction was mentioned in (num_vaes_symptom), number of VAE cases that the respective vaccine type and reaction were co-reported (num_vaes_vax_n_event), contingency matrix 1 values (a, b, c, d), respective PRR score and 95% confidence interval (prr, prr_95ci_min, prr_95ci_max), the respective Fisher's two-tailed test p-value and if it is <0.05 (pvalue_fisher_exact_test_two_tailed, significant_by_fisher_exact_test), and percent (%) of the vaccine type's VAEs that the reaction was co-reported (percent_event_in_vax_vaes). [file 6576483.f4.zip]

Archive with 1 entries (1 files):
- Additional_File_4.txt
