# Supplementary material for: Examining Socioeconomic and Computational Aspects of Vaccine Pharmacovigilance
Source: Biomed Res Int. 2019 Feb 19;2019:6576483. doi: 10.1155/2019/6576483 (PMC6399563; doi:10.1155/2019/6576483)
Supplement: Supplementary 4 — File name and format: Additional_File_4.txt. Title: Vaccine reaction profiles. Description: Tab separated file containing vaccine types (vax_type), number of VAEs that the vaccine type was mentioned in (num_vaes_vax_type), reaction names co-reported with the respective vaccine type (symptom_reaction_event), total number of cases that the reaction was mentioned in (num_vaes_symptom), number of VAE cases that the respective vaccine type and reaction were co-reported (num_vaes_vax_n_event), contingency matrix 1 values (a, b, c, d), respective PRR score and 95% confidence interval (prr, prr_95ci_min, prr_95ci_max), the respective Fisher's two-tailed test p-value and if it is <0.05 (pvalue_fisher_exact_test_two_tailed, significant_by_fisher_exact_test), and percent (%) of the vaccine type's VAEs that the reaction was co-reported (percent_event_in_vax_vaes). [file 6576483.f4.zip › Additional_File_4.txt]

vax_type	num_vaes_vax_type	symptom_reaction_event	num_vaes_symptom	num_vaes_vax_n_event	a	b	c	d	prr	prr_95ci_min	prr_95ci_max	pvalue_fisher_exact_test_two_tailed	significant_by_fisher_exact_test	percent_event_in_vax_vaes
6VAX-F	2648	ABASIA	1681	8	8	2640	1673	602902	1.09176	0.54565	2.18444	0.71012	False	0.30211
6VAX-F	2648	ABDOMEN SCAN	15	1	1	2647	14	604561	16.30813	2.14519	123.97716	0.06345	False	0.03776
6VAX-F	2648	ABDOMEN SCAN NORMAL	34	8	8	2640	26	604549	70.25041	31.83450	155.02425	0.00000	True	0.30211
6VAX-F	2648	ABDOMINAL DISCOMFORT	1280	6	6	2642	1274	603301	1.07526	0.48260	2.39577	0.82950	False	0.22659
6VAX-F	2648	ABDOMINAL DISTENSION	744	18	18	2630	726	603849	5.66067	3.55173	9.02186	0.00000	True	0.67976
6VAX-F	2648	ABDOMINAL MASS	108	2	2	2646	106	604469	4.30781	1.06397	17.44148	0.08118	False	0.07553
6VAX-F	2648	ABDOMINAL PAIN	6739	67	67	2581	6672	597903	2.29272	1.80784	2.90764	0.00000	True	2.53021
6VAX-F	2648	ABDOMINAL PAIN UPPER	3450	8	8	2640	3442	601133	0.53065	0.26544	1.06085	0.06886	False	0.30211
6VAX-F	2648	ABDOMINAL RIGIDITY	54	3	3	2645	51	604524	13.43022	4.19427	43.00410	0.00174	True	0.11329
6VAX-F	2648	ABDOMINAL X-RAY	479	16	16	2632	463	604112	7.88989	4.80017	12.96837	0.00000	True	0.60423
6VAX-F	2648	ABNORMAL BEHAVIOUR	2166	33	33	2615	2133	602442	3.53228	2.50991	4.97109	0.00000	True	1.24622
6VAX-F	2648	ABNORMAL FAECES	353	15	15	2633	338	604237	10.13227	6.04940	16.97076	0.00000	True	0.56647
6VAX-F	2648	ABSCESS	836	8	8	2640	828	603747	2.20593	1.10064	4.42118	0.03234	True	0.30211
6VAX-F	2648	ABSCESS DRAINAGE	135	7	7	2641	128	604447	12.48591	5.84018	26.69403	0.00000	True	0.26435
6VAX-F	2648	ABSCESS INTESTINAL	3	1	1	2647	2	604573	114.15691	10.35405	1258.61897	0.01303	True	0.03776
6VAX-F	2648	ABSCESS LIMB	62	2	2	2646	60	604515	7.61046	1.86116	31.11983	0.03025	True	0.07553
6VAX-F	2648	ACCIDENTAL OVERDOSE	174	1	1	2647	173	604402	1.31973	0.18492	9.41887	0.53259	False	0.03776
6VAX-F	2648	ACETONAEMIA	2	1	1	2647	1	604574	228.31382	14.28379	3649.39553	0.00870	True	0.03776
6VAX-F	2648	ACID BASE BALANCE	2	1	1	2647	1	604574	228.31382	14.28379	3649.39553	0.00870	True	0.03776
6VAX-F	2648	ACID BASE BALANCE NORMAL	15	4	4	2644	11	604564	83.02321	26.45284	260.57138	0.00000	True	0.15106
6VAX-F	2648	ACIDOSIS	144	3	3	2645	141	604434	4.85774	1.54903	15.23382	0.02563	True	0.11329
6VAX-F	2648	ACIDOSIS HYPERCHLORAEMIC	2	1	1	2647	1	604574	228.31382	14.28379	3649.39553	0.00870	True	0.03776
6VAX-F	2648	ACINETOBACTER TEST POSITIVE	1	1	1	2647	0	604575	-100.00000	-100.00000	-100.00000	0.00436	True	0.03776
6VAX-F	2648	ACNE	510	1	1	2647	509	604066	0.44855	0.06308	3.18938	0.73186	False	0.03776
6VAX-F	2648	ACOUSTIC STIMULATION TESTS ABNORMAL	52	1	1	2647	51	604524	4.47674	0.61887	32.38352	0.20329	False	0.03776
6VAX-F	2648	ACOUSTIC STIMULATION TESTS NORMAL	57	1	1	2647	56	604519	4.07703	0.56457	29.44204	0.22052	False	0.03776
6VAX-F	2648	ACTIVATED PARTIAL THROMBOPLASTIN TIME	90	5	5	2643	85	604490	13.43022	5.45409	33.07079	0.00005	True	0.18882
6VAX-F	2648	ACTIVATED PARTIAL THROMBOPLASTIN TIME ABNORMAL	3	1	1	2647	2	604573	114.15691	10.35405	1258.61897	0.01303	True	0.03776
6VAX-F	2648	ACTIVATED PARTIAL THROMBOPLASTIN TIME NORMAL	117	11	11	2637	106	604469	23.69294	12.74939	44.03001	0.00000	True	0.41541
6VAX-F	2648	ACTIVATED PARTIAL THROMBOPLASTIN TIME PROLONGED	83	7	7	2641	76	604499	21.02890	9.70522	45.56462	0.00000	True	0.26435
6VAX-F	2648	ACTIVATED PARTIAL THROMBOPLASTIN TIME SHORTENED	51	3	3	2645	48	604527	14.26961	4.44742	45.78429	0.00148	True	0.11329
6VAX-F	2648	ACUTE ABDOMEN	18	1	1	2647	17	604558	13.43022	1.78791	100.88385	0.07565	False	0.03776
6VAX-F	2648	ACUTE DISSEMINATED ENCEPHALOMYELITIS	302	2	2	2646	300	604275	1.52209	0.37911	6.11108	0.37945	False	0.07553
6VAX-F	2648	ACUTE HAEMORRHAGIC OEDEMA OF INFANCY	9	1	1	2647	8	604567	28.53923	3.57061	228.10887	0.03857	True	0.03776
6VAX-F	2648	ACUTE LYMPHOCYTIC LEUKAEMIA	37	3	3	2645	34	604541	20.14534	6.19111	65.55114	0.00058	True	0.11329
6VAX-F	2648	ACUTE RESPIRATORY FAILURE	47	1	1	2647	46	604529	4.96334	0.68472	35.97779	0.18569	False	0.03776
6VAX-F	2648	ACUTE TONSILLITIS	30	1	1	2647	29	604546	7.87289	1.07281	57.77560	0.12288	False	0.03776
6VAX-F	2648	ADENOIDECTOMY	11	1	1	2647	10	604565	22.83138	2.92363	178.29632	0.04694	True	0.03776
6VAX-F	2648	ADENOVIRUS INFECTION	41	2	2	2646	39	604536	11.70840	2.82864	48.46372	0.01393	True	0.07553
6VAX-F	2648	ADENOVIRUS TEST	203	24	24	2624	179	604396	30.61191	20.02620	46.79315	0.00000	True	0.90634
6VAX-F	2648	ADENOVIRUS TEST POSITIVE	54	6	6	2642	48	604527	28.53923	12.22439	66.62804	0.00000	True	0.22659
6VAX-F	2648	ADMINISTRATION SITE HAEMATOMA	1	1	1	2647	0	604575	-100.00000	-100.00000	-100.00000	0.00436	True	0.03776
6VAX-F	2648	ADMINISTRATION SITE PAIN	48	1	1	2647	47	604528	4.85774	0.67045	35.19651	0.18924	False	0.03776
6VAX-F	2648	ADVERSE DRUG REACTION	145	1	1	2647	144	604431	1.58551	0.22190	11.32861	0.46942	False	0.03776
6VAX-F	2648	ADVERSE REACTION	515	1	1	2647	514	604061	0.44419	0.06247	3.15829	0.73248	False	0.03776
6VAX-F	2648	AFFECTIVE DISORDER	35	1	1	2647	34	604541	6.71511	0.91953	49.03865	0.14184	False	0.03776
6VAX-F	2648	AGGRESSION	523	2	2	2646	521	604054	0.87644	0.21872	3.51198	1.00000	False	0.07553
6VAX-F	2648	AGITATION	10221	43	43	2605	10178	594397	0.96458	0.71666	1.29826	0.87968	False	1.62387
6VAX-F	2648	AGRANULOCYTOSIS	22	2	2	2646	20	604555	22.83138	5.33913	97.63242	0.00414	True	0.07553
6VAX-F	2648	AKATHISIA	23	1	1	2647	22	604553	10.37790	1.39933	76.96613	0.09563	False	0.03776
6VAX-F	2648	ALANINE AMINOTRANSFERASE	62	7	7	2641	55	604520	29.05812	13.24584	63.74639	0.00000	True	0.26435
6VAX-F	2648	ALANINE AMINOTRANSFERASE DECREASED	21	2	2	2646	19	604556	24.03303	5.60064	103.12867	0.00378	True	0.07553
6VAX-F	2648	ALANINE AMINOTRANSFERASE INCREASED	1486	31	31	2617	1455	603120	4.86442	3.41523	6.92855	0.00000	True	1.17069
6VAX-F	2648	ALANINE AMINOTRANSFERASE NORMAL	405	31	31	2617	374	604201	18.92441	13.14605	27.24264	0.00000	True	1.17069
6VAX-F	2648	ALBUMIN CSF	13	1	1	2647	12	604563	19.02615	2.47475	146.27523	0.05523	False	0.03776
6VAX-F	2648	ALLERGY TEST	299	2	2	2646	297	604278	1.53747	0.38292	6.17309	0.37482	False	0.07553
6VAX-F	2648	ALLERGY TEST NEGATIVE	179	3	3	2645	176	604399	3.89171	1.24393	12.17544	0.04428	True	0.11329
6VAX-F	2648	ALLERGY TEST POSITIVE	181	2	2	2646	179	604396	2.55099	0.63341	10.27393	0.18719	False	0.07553
6VAX-F	2648	ALLERGY TO METALS	178	2	2	2646	176	604399	2.59448	0.64412	10.45043	0.18250	False	0.07553
6VAX-F	2648	ALLERGY TO VACCINE	427	1	1	2647	426	604149	0.53595	0.07535	3.81221	1.00000	False	0.03776
6VAX-F	2648	ALOPECIA	1083	1	1	2647	1082	603493	0.21101	0.02971	1.49884	0.10134	False	0.03776
6VAX-F	2648	ALPHA-1 ACID GLYCOPROTEIN INCREASED	1	1	1	2647	0	604575	-100.00000	-100.00000	-100.00000	0.00436	True	0.03776
6VAX-F	2648	ALPHA-1 ANTI-TRYPSIN INCREASED	1	1	1	2647	0	604575	-100.00000	-100.00000	-100.00000	0.00436	True	0.03776
6VAX-F	2648	ALPHA 1 FOETOPROTEIN	28	1	1	2647	27	604548	8.45607	1.14945	62.20812	0.11518	False	0.03776
6VAX-F	2648	ALPHA 1 GLOBULIN NORMAL	10	1	1	2647	9	604566	25.36820	3.21500	200.16965	0.04276	True	0.03776
6VAX-F	2648	ALPHA 2 GLOBULIN INCREASED	18	1	1	2647	17	604558	13.43022	1.78791	100.88385	0.07565	False	0.03776
6VAX-F	2648	ALPHA 2 GLOBULIN NORMAL	9	1	1	2647	8	604567	28.53923	3.57061	228.10887	0.03857	True	0.03776
6VAX-F	2648	ALTERED STATE OF CONSCIOUSNESS	405	13	13	2635	392	604183	7.57163	4.36310	13.13966	0.00000	True	0.49094
6VAX-F	2648	AMAUROTIC FAMILIAL IDIOCY	2	1	1	2647	1	604574	228.31382	14.28379	3649.39553	0.00870	True	0.03776
6VAX-F	2648	AMENORRHOEA	282	1	1	2647	281	604294	0.81250	0.11409	5.78622	1.00000	False	0.03776
6VAX-F	2648	AMINO ACID LEVEL ABNORMAL	2	1	1	2647	1	604574	228.31382	14.28379	3649.39553	0.00870	True	0.03776
6VAX-F	2648	AMINO ACID LEVEL INCREASED	6	2	2	2646	4	604571	114.15691	20.91765	623.00493	0.00028	True	0.07553
6VAX-F	2648	AMINO ACID LEVEL NORMAL	31	4	4	2644	27	604548	33.82427	11.84358	96.59925	0.00001	True	0.15106
6VAX-F	2648	AMMONIA	13	3	3	2645	10	604565	68.49415	18.86075	248.74131	0.00002	True	0.11329
6VAX-F	2648	AMMONIA DECREASED	8	1	1	2647	7	604568	32.61626	4.01417	265.01630	0.03436	True	0.03776
6VAX-F	2648	AMMONIA INCREASED	30	2	2	2646	28	604547	16.30813	3.88685	68.42436	0.00763	True	0.07553
6VAX-F	2648	AMMONIA NORMAL	44	13	13	2635	31	604544	95.74451	50.15784	182.76327	0.00000	True	0.49094
6VAX-F	2648	AMYLASE	18	2	2	2646	16	604559	28.53923	6.56515	124.06230	0.00278	True	0.07553
6VAX-F	2648	AMYLASE DECREASED	13	1	1	2647	12	604563	19.02615	2.47475	146.27523	0.05523	False	0.03776
6VAX-F	2648	AMYLASE INCREASED	27	1	1	2647	26	604549	8.78130	1.19202	64.68934	0.11131	False	0.03776
6VAX-F	2648	AMYLASE NORMAL	23	2	2	2646	21	604554	21.74417	5.10093	92.69075	0.00453	True	0.07553
6VAX-F	2648	ANAEMIA	1150	17	17	2631	1133	603442	3.42571	2.12530	5.52183	0.00002	True	0.64199
6VAX-F	2648	ANAL FISSURE	34	1	1	2647	33	604542	6.91860	0.94658	50.56819	0.13808	False	0.03776
6VAX-F	2648	ANAL PAP SMEAR ABNORMAL	2	1	1	2647	1	604574	228.31382	14.28379	3649.39553	0.00870	True	0.03776
6VAX-F	2648	ANAPHYLACTIC REACTION	1840	13	13	2635	1827	602748	1.62456	0.94274	2.79950	0.10542	False	0.49094
6VAX-F	2648	ANAPHYLACTIC SHOCK	324	6	6	2642	318	604257	4.30781	1.92255	9.65240	0.00325	True	0.22659
6VAX-F	2648	ANAPHYLACTOID REACTION	443	1	1	2647	442	604133	0.51655	0.07263	3.67391	1.00000	False	0.03776
6VAX-F	2648	ANEURYSM	21	2	2	2646	19	604556	24.03303	5.60064	103.12867	0.00378	True	0.07553
6VAX-F	2648	ANGER	203	3	3	2645	200	604375	3.42471	1.09592	10.70209	0.06003	False	0.11329
6VAX-F	2648	ANGIOEDEMA	669	6	6	2642	663	603912	2.06619	0.92574	4.61161	0.07528	False	0.22659
6VAX-F	2648	ANGIOGRAM ABNORMAL	32	1	1	2647	31	604544	7.36496	1.00575	53.93232	0.13052	False	0.03776
6VAX-F	2648	ANGIOGRAM CEREBRAL ABNORMAL	5	1	1	2647	4	604571	57.07846	6.38156	510.52564	0.02161	True	0.03776
6VAX-F	2648	ANGIOPATHY	103	2	2	2646	101	604474	4.52107	1.11593	18.31666	0.07484	False	0.07553
6VAX-F	2648	ANISOCHROMIA	1	1	1	2647	0	604575	-100.00000	-100.00000	-100.00000	0.00436	True	0.03776
6VAX-F	2648	ANISOCYTOSIS	12	1	1	2647	11	604564	20.75580	2.68057	160.71348	0.05109	False	0.03776
6VAX-F	2648	ANISOMETROPIA	4	1	1	2647	3	604572	76.10461	7.91863	731.42883	0.01733	True	0.03776
6VAX-F	2648	ANORECTAL DISORDER	47	3	3	2645	44	604531	15.56685	4.83663	50.10238	0.00116	True	0.11329
6VAX-F	2648	ANOREXIA	4257	6	6	2642	4251	600324	0.32225	0.14482	0.71705	0.00144	True	0.22659
6VAX-F	2648	ANTEMORTEM BLOOD DRUG LEVEL	1	1	1	2647	0	604575	-100.00000	-100.00000	-100.00000	0.00436	True	0.03776
6VAX-F	2648	ANTI-GAD ANTIBODY POSITIVE	19	1	1	2647	18	604557	12.68410	1.69385	94.98282	0.07968	False	0.03776
6VAX-F	2648	ANTI-HBC ANTIBODY NEGATIVE	18	1	1	2647	17	604558	13.43022	1.78791	100.88385	0.07565	False	0.03776
6VAX-F	2648	ANTI-HBS ANTIBODY POSITIVE	40	1	1	2647	39	604536	5.85420	0.80457	42.59605	0.16039	False	0.03776
6VAX-F	2648	ANTI-INSULIN ANTIBODY DECREASED	2	1	1	2647	1	604574	228.31382	14.28379	3649.39553	0.00870	True	0.03776
6VAX-F	2648	ANTI-ISLET CELL ANTIBODY	18	1	1	2647	17	604558	13.43022	1.78791	100.88385	0.07565	False	0.03776
6VAX-F	2648	ANTI-NMDA ANTIBODY NEGATIVE	8	1	1	2647	7	604568	32.61626	4.01417	265.01630	0.03436	True	0.03776
6VAX-F	2648	ANTI-PLATELET ANTIBODY POSITIVE	9	1	1	2647	8	604567	28.53923	3.57061	228.10887	0.03857	True	0.03776
6VAX-F	2648	ANTI-THYROID ANTIBODY	26	1	1	2647	25	604550	9.13255	1.23787	67.37651	0.10741	False	0.03776
6VAX-F	2648	ANTI-THYROID ANTIBODY NEGATIVE	40	3	3	2645	37	604538	18.51193	5.71130	60.00240	0.00073	True	0.11329
6VAX-F	2648	ANTI-TRANSGLUTAMINASE ANTIBODY INCREASED	3	1	1	2647	2	604573	114.15691	10.35405	1258.61897	0.01303	True	0.03776
6VAX-F	2648	ANTI-TRANSGLUTAMINASE ANTIBODY NEGATIVE	13	5	5	2643	8	604567	142.69614	46.71184	435.91060	0.00000	True	0.18882
6VAX-F	2648	ANTIBIOTIC RESISTANT STAPHYLOCOCCUS TEST NEGATIVE	17	1	1	2647	16	604559	14.26961	1.89302	107.56480	0.07160	False	0.03776
6VAX-F	2648	ANTIBODY TEST	157	2	2	2646	155	604420	2.94598	0.73061	11.87889	0.15023	False	0.07553
6VAX-F	2648	ANTIBODY TEST ABNORMAL	144	2	2	2646	142	604433	3.21569	0.79685	12.97695	0.13090	False	0.07553
6VAX-F	2648	ANTIBODY TEST NEGATIVE	889	7	7	2641	882	603693	1.81201	0.86215	3.80838	0.11811	False	0.26435
6VAX-F	2648	ANTIBODY TEST NORMAL	36	2	2	2646	34	604541	13.43022	3.22815	55.87440	0.01085	True	0.07553
6VAX-F	2648	ANTIBODY TEST POSITIVE	157	2	2	2646	155	604420	2.94598	0.73061	11.87889	0.15023	False	0.07553
6VAX-F	2648	ANTICONVULSANT DRUG LEVEL	15	4	4	2644	11	604564	83.02321	26.45284	260.57138	0.00000	True	0.15106
6VAX-F	2648	ANTIDIURETIC HORMONE ABNORMALITY	3	1	1	2647	2	604573	114.15691	10.35405	1258.61897	0.01303	True	0.03776
6VAX-F	2648	ANTIENDOMYSIAL ANTIBODY TEST	1	1	1	2647	0	604575	-100.00000	-100.00000	-100.00000	0.00436	True	0.03776
6VAX-F	2648	ANTIGLIADIN ANTIBODY POSITIVE	10	1	1	2647	9	604566	25.36820	3.21500	200.16965	0.04276	True	0.03776
6VAX-F	2648	ANTINEUTROPHIL CYTOPLASMIC ANTIBODY NEGATIVE	159	1	1	2647	158	604417	1.44502	0.20236	10.31860	0.50092	False	0.03776
6VAX-F	2648	ANTINEUTROPHIL CYTOPLASMIC ANTIBODY POSITIVE	56	1	1	2647	55	604520	4.15116	0.57466	29.98680	0.21710	False	0.03776
6VAX-F	2648	ANTINUCLEAR ANTIBODY	479	1	1	2647	478	604097	0.47764	0.06717	3.39664	0.72918	False	0.03776
6VAX-F	2648	ANTINUCLEAR ANTIBODY INCREASED	79	1	1	2647	78	604497	2.92710	0.40733	21.03456	0.29198	False	0.03776
6VAX-F	2648	ANTINUCLEAR ANTIBODY NEGATIVE	654	3	3	2645	651	603924	1.05214	0.33866	3.26870	0.76493	False	0.11329
6VAX-F	2648	ANTINUCLEAR ANTIBODY POSITIVE	429	1	1	2647	428	604147	0.53344	0.07500	3.79436	1.00000	False	0.03776
6VAX-F	2648	ANTIPHOSPHOLIPID ANTIBODIES NEGATIVE	54	2	2	2646	52	604523	8.78130	2.14001	36.03313	0.02342	True	0.07553
6VAX-F	2648	ANTIPYRESIS	1	1	1	2647	0	604575	-100.00000	-100.00000	-100.00000	0.00436	True	0.03776
6VAX-F	2648	ANTITHROMBIN III DECREASED	6	2	2	2646	4	604571	114.15691	20.91765	623.00493	0.00028	True	0.07553
6VAX-F	2648	ANTITHROMBIN III INCREASED	3	1	1	2647	2	604573	114.15691	10.35405	1258.61897	0.01303	True	0.03776
6VAX-F	2648	ANURIA	51	1	1	2647	50	604525	4.56628	0.63101	33.04377	0.19980	False	0.03776
6VAX-F	2648	ANXIETY	2506	15	15	2633	2491	602084	1.37483	0.82876	2.28071	0.22058	False	0.56647
6VAX-F	2648	ANXIETY DISORDER DUE TO A GENERAL MEDICAL CONDITION	1	1	1	2647	0	604575	-100.00000	-100.00000	-100.00000	0.00436	True	0.03776
6VAX-F	2648	APALLIC SYNDROME	8	1	1	2647	7	604568	32.61626	4.01417	265.01630	0.03436	True	0.03776
6VAX-F	2648	APATHY	437	47	47	2601	390	604185	27.51474	20.37903	37.14902	0.00000	True	1.77492
6VAX-F	2648	APGAR SCORE ABNORMAL	15	1	1	2647	14	604561	16.30813	2.14519	123.97716	0.06345	False	0.03776
6VAX-F	2648	APGAR SCORE NORMAL	83	9	9	2639	74	604501	27.76790	13.91561	55.40945	0.00000	True	0.33988
6VAX-F	2648	APHAGIA	130	3	3	2645	127	604448	5.39324	1.71753	16.93536	0.01967	True	0.11329
6VAX-F	2648	APHASIA	1017	2	2	2646	1015	603560	0.44988	0.11242	1.80037	0.34028	False	0.07553
6VAX-F	2648	APHONIA	178	2	2	2646	176	604399	2.59448	0.64412	10.45043	0.18250	False	0.07553
6VAX-F	2648	APNOEA	2995	147	147	2501	2848	601727	11.78446	10.02877	13.84750	0.00000	True	5.55136
6VAX-F	2648	APNOEA NEONATAL	8	3	3	2645	5	604570	136.98829	32.75393	572.93256	0.00000	True	0.11329
6VAX-F	2648	APNOEA TEST	8	2	2	2646	6	604569	76.10461	15.36713	376.90260	0.00052	True	0.07553
6VAX-F	2648	APNOEIC ATTACK	66	12	12	2636	54	604521	50.73640	27.17481	94.72680	0.00000	True	0.45317
6VAX-F	2648	APPARENT DEATH	26	1	1	2647	25	604550	9.13255	1.23787	67.37651	0.10741	False	0.03776
6VAX-F	2648	APPARENT LIFE THREATENING EVENT	145	29	29	2619	116	604459	57.07846	38.06511	85.58887	0.00000	True	1.09517
6VAX-F	2648	APPENDICECTOMY	173	6	6	2642	167	604408	8.20289	3.63630	18.50435	0.00013	True	0.22659
6VAX-F	2648	APPENDICITIS	92	1	1	2647	91	604484	2.50894	0.34976	17.99748	0.33109	False	0.03776
6VAX-F	2648	APPETITE DISORDER	60	2	2	2646	58	604517	7.87289	1.92383	32.21817	0.02847	True	0.07553
6VAX-F	2648	APPLICATION SITE ERYTHEMA	33	1	1	2647	32	604543	7.13481	0.97527	52.19614	0.13431	False	0.03776
6VAX-F	2648	APPLICATION SITE EXFOLIATION	1	1	1	2647	0	604575	-100.00000	-100.00000	-100.00000	0.00436	True	0.03776
6VAX-F	2648	AREFLEXIA	320	3	3	2645	317	604258	2.16070	0.69359	6.73110	0.16505	False	0.11329
6VAX-F	2648	ARRHYTHMIA	431	1	1	2647	430	604145	0.53096	0.07465	3.77667	1.00000	False	0.03776
6VAX-F	2648	ARTERIOGRAM CORONARY ABNORMAL	8	2	2	2646	6	604569	76.10461	15.36713	376.90260	0.00052	True	0.07553
6VAX-F	2648	ARTHRALGIA	17114	5	5	2643	17109	587466	0.06672	0.02779	0.16019	0.00000	True	0.18882
6VAX-F	2648	ARTHRITIS	2046	2	2	2646	2044	602531	0.22340	0.05586	0.89341	0.01121	True	0.07553
6VAX-F	2648	ARTHROPOD BITE	128	1	1	2647	127	604448	1.79775	0.25138	12.85670	0.42849	False	0.03776
6VAX-F	2648	ASCITES	97	4	4	2644	93	604482	9.81995	3.61211	26.69673	0.00091	True	0.15106
6VAX-F	2648	ASPARTATE AMINOTRANSFERASE	52	6	6	2642	46	604529	29.78006	12.72977	69.66756	0.00000	True	0.22659
6VAX-F	2648	ASPARTATE AMINOTRANSFERASE DECREASED	14	2	2	2646	12	604563	38.05230	8.52049	169.94071	0.00167	True	0.07553
6VAX-F	2648	ASPARTATE AMINOTRANSFERASE INCREASED	1438	35	35	2613	1403	603172	5.69564	4.08153	7.94807	0.00000	True	1.32175
6VAX-F	2648	ASPARTATE AMINOTRANSFERASE NORMAL	395	30	30	2618	365	604210	18.76552	12.95812	27.17561	0.00000	True	1.13293
6VAX-F	2648	ASPHYXIA	111	4	4	2644	107	604468	8.53510	3.14800	23.14100	0.00149	True	0.15106
6VAX-F	2648	ASPIRATION	115	8	8	2640	107	604468	17.07019	8.33069	34.97809	0.00000	True	0.30211
6VAX-F	2648	ASPIRATION BONE MARROW	25	2	2	2646	23	604552	19.85338	4.68304	84.16683	0.00534	True	0.07553
6VAX-F	2648	ASPIRATION BONE MARROW ABNORMAL	24	3	3	2645	21	604554	32.61626	9.73449	109.28365	0.00016	True	0.11329
6VAX-F	2648	ASPIRATION BONE MARROW NORMAL	16	1	1	2647	15	604560	15.22092	2.01124	115.19084	0.06754	False	0.03776
6VAX-F	2648	ASTHENIA	17626	40	40	2608	17586	586989	0.51931	0.38169	0.70655	0.00000	True	1.51057
6VAX-F	2648	ASTHMA	2501	6	6	2642	2495	602080	0.54905	0.24665	1.22220	0.16845	False	0.22659
6VAX-F	2648	ASTIGMATISM	18	2	2	2646	16	604559	28.53923	6.56515	124.06230	0.00278	True	0.07553
6VAX-F	2648	ATAXIA	457	4	4	2644	453	604122	2.01602	0.75393	5.39083	0.14113	False	0.15106
6VAX-F	2648	ATELECTASIS	173	2	2	2646	171	604404	2.67034	0.66280	10.75846	0.17472	False	0.07553
6VAX-F	2648	ATONIC SEIZURES	35	6	6	2642	29	604546	47.23734	19.62806	113.68249	0.00000	True	0.22659
6VAX-F	2648	ATOPY	10	1	1	2647	9	604566	25.36820	3.21500	200.16965	0.04276	True	0.03776
6VAX-F	2648	ATRIAL FIBRILLATION	284	1	1	2647	283	604292	0.80676	0.11329	5.74519	1.00000	False	0.03776
6VAX-F	2648	ATRIAL TACHYCARDIA	10	2	2	2646	8	604567	57.07846	12.12635	268.66696	0.00084	True	0.07553
6VAX-F	2648	ATRIOVENTRICULAR BLOCK	44	1	1	2647	43	604532	5.30962	0.73142	38.54449	0.17494	False	0.03776
6VAX-F	2648	ATROPHY	38	1	1	2647	37	604538	6.17064	0.84693	44.95879	0.15302	False	0.03776
6VAX-F	2648	ATTENTION DEFICIT/HYPERACTIVITY DISORDER	99	2	2	2646	97	604478	4.70750	1.16129	19.08268	0.06989	False	0.07553
6VAX-F	2648	ATYPICAL PNEUMONIA	19	1	1	2647	18	604557	12.68410	1.69385	94.98282	0.07968	False	0.03776
6VAX-F	2648	AUTISM	2476	5	5	2643	2471	602104	0.46199	0.19228	1.11002	0.08981	False	0.18882
6VAX-F	2648	AUTISM SPECTRUM DISORDER	221	5	5	2643	216	604359	5.28504	2.17946	12.81587	0.00304	True	0.18882
6VAX-F	2648	AUTOANTIBODY NEGATIVE	47	1	1	2647	46	604529	4.96334	0.68472	35.97779	0.18569	False	0.03776
6VAX-F	2648	AUTOANTIBODY POSITIVE	33	1	1	2647	32	604543	7.13481	0.97527	52.19614	0.13431	False	0.03776
6VAX-F	2648	AUTOIMMUNE HAEMOLYTIC ANAEMIA	23	3	3	2645	20	604555	34.24707	10.18269	115.18199	0.00014	True	0.11329
6VAX-F	2648	AUTOIMMUNE NEUTROPENIA	13	2	2	2646	11	604564	41.51160	9.20542	187.19547	0.00144	True	0.07553
6VAX-F	2648	AUTOIMMUNE THROMBOCYTOPENIA	68	3	3	2645	65	604510	10.53756	3.31398	33.50660	0.00336	True	0.11329
6VAX-F	2648	AUTOMATISM	5	1	1	2647	4	604571	57.07846	6.38156	510.52564	0.02161	True	0.03776
6VAX-F	2648	AUTOPSY	483	34	34	2614	449	604126	17.28880	12.22549	24.44913	0.00000	True	1.28399
6VAX-F	2648	AXILLARY MASS	155	1	1	2647	154	604421	1.48256	0.20759	10.58832	0.49211	False	0.03776
6VAX-F	2648	AZOTAEMIA	32	1	1	2647	31	604544	7.36496	1.00575	53.93232	0.13052	False	0.03776
6VAX-F	2648	BABINSKI REFLEX TEST	33	1	1	2647	32	604543	7.13481	0.97527	52.19614	0.13431	False	0.03776
6VAX-F	2648	BACK PAIN	5994	2	2	2646	5992	598583	0.07621	0.01906	0.30462	0.00000	True	0.07553
6VAX-F	2648	BACTERAEMIA	146	1	1	2647	145	604430	1.57458	0.22038	11.24995	0.47173	False	0.03776
6VAX-F	2648	BACTERIA STOOL IDENTIFIED	9	1	1	2647	8	604567	28.53923	3.57061	228.10887	0.03857	True	0.03776
6VAX-F	2648	BACTERIA URINE IDENTIFIED	14	1	1	2647	13	604562	17.56260	2.29824	134.20945	0.05935	False	0.03776
6VAX-F	2648	BACTERIA URINE NO ORGANISM OBSERVED	3	1	1	2647	2	604573	114.15691	10.35405	1258.61897	0.01303	True	0.03776
6VAX-F	2648	BACTERIAL CULTURE NEGATIVE	38	1	1	2647	37	604538	6.17064	0.84693	44.95879	0.15302	False	0.03776
6VAX-F	2648	BACTERIAL CULTURE POSITIVE	19	1	1	2647	18	604557	12.68410	1.69385	94.98282	0.07968	False	0.03776
6VAX-F	2648	BACTERIAL DISEASE CARRIER	4	1	1	2647	3	604572	76.10461	7.91863	731.42883	0.01733	True	0.03776
6VAX-F	2648	BACTERIAL DNA TEST POSITIVE	2	1	1	2647	1	604574	228.31382	14.28379	3649.39553	0.00870	True	0.03776
6VAX-F	2648	BACTERIAL INFECTION	1334	7	7	2641	1327	603248	1.20437	0.57360	2.52878	0.53165	False	0.26435
6VAX-F	2648	BACTERIAL PYELONEPHRITIS	3	1	1	2647	2	604573	114.15691	10.35405	1258.61897	0.01303	True	0.03776
6VAX-F	2648	BACTERIAL SEPSIS	9	1	1	2647	8	604567	28.53923	3.57061	228.10887	0.03857	True	0.03776
6VAX-F	2648	BACTERIAL TEST	115	2	2	2646	113	604462	4.04095	0.99886	16.34790	0.09031	False	0.07553
6VAX-F	2648	BACTERIAL TEST NEGATIVE	418	24	24	2624	394	604181	13.90744	9.22675	20.96262	0.00000	True	0.90634
6VAX-F	2648	BACTERIAL TEST POSITIVE	165	9	9	2639	156	604419	13.17195	6.73461	25.76249	0.00000	True	0.33988
6VAX-F	2648	BACTERIURIA	9	1	1	2647	8	604567	28.53923	3.57061	228.10887	0.03857	True	0.03776
6VAX-F	2648	BALANCE DISORDER	1601	4	4	2644	1597	602978	0.57186	0.21452	1.52442	0.34065	False	0.15106
6VAX-F	2648	BAND NEUTROPHIL COUNT	24	3	3	2645	21	604554	32.61626	9.73449	109.28365	0.00016	True	0.11329
6VAX-F	2648	BAND NEUTROPHIL COUNT DECREASED	19	1	1	2647	18	604557	12.68410	1.69385	94.98282	0.07968	False	0.03776
6VAX-F	2648	BAND NEUTROPHIL PERCENTAGE	39	1	1	2647	38	604537	6.00826	0.82521	43.74555	0.15671	False	0.03776
6VAX-F	2648	BAND NEUTROPHIL PERCENTAGE INCREASED	32	2	2	2646	30	604545	15.22092	3.63933	63.65917	0.00864	True	0.07553
6VAX-F	2648	BARIUM DOUBLE CONTRAST	103	2	2	2646	101	604474	4.52107	1.11593	18.31666	0.07484	False	0.07553
6VAX-F	2648	BARIUM ENEMA	176	3	3	2645	173	604402	3.95920	1.26529	12.38863	0.04247	True	0.11329
6VAX-F	2648	BARIUM ENEMA ABNORMAL	67	1	1	2647	66	604509	3.45930	0.48029	24.91550	0.25385	False	0.03776
6VAX-F	2648	BARTONELLA TEST POSITIVE	4	1	1	2647	3	604572	76.10461	7.91863	731.42883	0.01733	True	0.03776
6VAX-F	2648	BASE EXCESS	6	1	1	2647	5	604570	45.66276	5.33639	390.72979	0.02588	True	0.03776
6VAX-F	2648	BASE EXCESS DECREASED	55	11	11	2637	44	604531	57.07846	29.51252	110.39215	0.00000	True	0.41541
6VAX-F	2648	BASE EXCESS INCREASED	17	6	6	2642	11	604564	124.53481	46.08928	336.49735	0.00000	True	0.22659
6VAX-F	2648	BASE EXCESS NEGATIVE	31	9	9	2639	22	604553	93.40111	43.04745	202.65468	0.00000	True	0.33988
6VAX-F	2648	BASOPHIL COUNT	12	1	1	2647	11	604564	20.75580	2.68057	160.71348	0.05109	False	0.03776
6VAX-F	2648	BASOPHIL COUNT DECREASED	72	1	1	2647	71	604504	3.21569	0.44693	23.13685	0.26998	False	0.03776
6VAX-F	2648	BASOPHIL COUNT NORMAL	107	4	4	2644	103	604472	8.86656	3.26797	24.05649	0.00130	True	0.15106
6VAX-F	2648	BASOPHIL PERCENTAGE	116	5	5	2643	111	604464	10.28441	4.20124	25.17568	0.00017	True	0.18882
6VAX-F	2648	BASOPHIL PERCENTAGE DECREASED	131	9	9	2639	122	604453	16.84282	8.56769	33.11050	0.00000	True	0.33988
6VAX-F	2648	BASOPHIL PERCENTAGE INCREASED	39	1	1	2647	38	604537	6.00826	0.82521	43.74555	0.15671	False	0.03776
6VAX-F	2648	BENIGN ROLANDIC EPILEPSY	3	1	1	2647	2	604573	114.15691	10.35405	1258.61897	0.01303	True	0.03776
6VAX-F	2648	BETA GLOBULIN NORMAL	18	1	1	2647	17	604558	13.43022	1.78791	100.88385	0.07565	False	0.03776
6VAX-F	2648	BETA HAEMOLYTIC STREPTOCOCCAL INFECTION	32	1	1	2647	31	604544	7.36496	1.00575	53.93232	0.13052	False	0.03776
6VAX-F	2648	BILEVEL POSITIVE AIRWAY PRESSURE	27	1	1	2647	26	604549	8.78130	1.19202	64.68934	0.11131	False	0.03776
6VAX-F	2648	BILIRUBIN CONJUGATED ABNORMAL	8	1	1	2647	7	604568	32.61626	4.01417	265.01630	0.03436	True	0.03776
6VAX-F	2648	BILIRUBIN CONJUGATED DECREASED	6	1	1	2647	5	604570	45.66276	5.33639	390.72979	0.02588	True	0.03776
6VAX-F	2648	BILIRUBIN CONJUGATED INCREASED	75	2	2	2646	73	604502	6.25517	1.53594	25.47446	0.04278	True	0.07553
6VAX-F	2648	BILIRUBIN URINE	42	2	2	2646	40	604535	11.41569	2.76032	47.21118	0.01458	True	0.07553
6VAX-F	2648	BIOPSY BONE MARROW	65	1	1	2647	64	604511	3.56740	0.49507	25.70594	0.24730	False	0.03776
6VAX-F	2648	BIOPSY BONE MARROW ABNORMAL	56	4	4	2644	52	604523	17.56260	6.35660	48.52355	0.00011	True	0.15106
6VAX-F	2648	BIOPSY COLON ABNORMAL	17	1	1	2647	16	604559	14.26961	1.89302	107.56480	0.07160	False	0.03776
6VAX-F	2648	BIOPSY HEART	7	1	1	2647	6	604569	38.05230	4.58259	315.97384	0.03013	True	0.03776
6VAX-F	2648	BIOPSY HEART ABNORMAL	2	1	1	2647	1	604574	228.31382	14.28379	3649.39553	0.00870	True	0.03776
6VAX-F	2648	BIOPSY INTESTINE ABNORMAL	16	1	1	2647	15	604560	15.22092	2.01124	115.19084	0.06754	False	0.03776
6VAX-F	2648	BIOPSY LIVER	12	1	1	2647	11	604564	20.75580	2.68057	160.71348	0.05109	False	0.03776
6VAX-F	2648	BIOPSY LUNG ABNORMAL	26	1	1	2647	25	604550	9.13255	1.23787	67.37651	0.10741	False	0.03776
6VAX-F	2648	BIOPSY MUSCLE ABNORMAL	166	1	1	2647	165	604410	1.38372	0.19383	9.87825	0.51596	False	0.03776
6VAX-F	2648	BIOPSY MUSCLE NORMAL	27	1	1	2647	26	604549	8.78130	1.19202	64.68934	0.11131	False	0.03776
6VAX-F	2648	BIOPSY RECTUM NORMAL	2	1	1	2647	1	604574	228.31382	14.28379	3649.39553	0.00870	True	0.03776
6VAX-F	2648	BIOPSY SKIN ABNORMAL	348	5	5	2643	343	604232	3.32819	1.37761	8.04063	0.01912	True	0.18882
6VAX-F	2648	BIOPSY SKIN NORMAL	41	1	1	2647	40	604535	5.70785	0.78495	41.50539	0.16405	False	0.03776
6VAX-F	2648	BIPOLAR DISORDER	24	1	1	2647	23	604552	9.92669	1.34103	73.48037	0.09958	False	0.03776
6VAX-F	2648	BLAST CELL COUNT INCREASED	6	2	2	2646	4	604571	114.15691	20.91765	623.00493	0.00028	True	0.07553
6VAX-F	2648	BLAST CELLS PRESENT	5	1	1	2647	4	604571	57.07846	6.38156	510.52564	0.02161	True	0.03776
6VAX-F	2648	BLEEDING TIME PROLONGED	17	1	1	2647	16	604559	14.26961	1.89302	107.56480	0.07160	False	0.03776
6VAX-F	2648	BLEPHAROSPASM	167	1	1	2647	166	604409	1.37538	0.19267	9.81839	0.51807	False	0.03776
6VAX-F	2648	BLINDNESS	651	1	1	2647	650	603925	0.35125	0.04942	2.49649	0.54034	False	0.03776
6VAX-F	2648	BLINDNESS CORTICAL	6	2	2	2646	4	604571	114.15691	20.91765	623.00493	0.00028	True	0.07553
6VAX-F	2648	BLISTER	4931	15	15	2633	4916	599659	0.69665	0.42026	1.15479	0.19120	False	0.56647
6VAX-F	2648	BLOOD 25-HYDROXYCHOLECALCIFEROL	20	1	1	2647	19	604556	12.01652	1.60918	89.73289	0.08370	False	0.03776
6VAX-F	2648	BLOOD ALBUMIN	46	1	1	2647	45	604530	5.07364	0.69961	36.79452	0.18212	False	0.03776
6VAX-F	2648	BLOOD ALBUMIN DECREASED	193	4	4	2644	189	604386	4.83204	1.79623	12.99869	0.01055	True	0.15106
6VAX-F	2648	BLOOD ALBUMIN INCREASED	36	3	3	2645	33	604542	20.75580	6.36948	67.63555	0.00053	True	0.11329
6VAX-F	2648	BLOOD ALBUMIN NORMAL	169	6	6	2642	163	604412	8.40419	3.72425	18.96502	0.00011	True	0.22659
6VAX-F	2648	BLOOD ALKALINE PHOSPHATASE	26	3	3	2645	23	604552	29.78006	8.94683	99.12475	0.00020	True	0.11329
6VAX-F	2648	BLOOD ALKALINE PHOSPHATASE INCREASED	522	11	11	2637	511	604064	4.91478	2.70791	8.92017	0.00002	True	0.41541
6VAX-F	2648	BLOOD ALKALINE PHOSPHATASE NORMAL	220	6	6	2642	214	604361	6.40132	2.84652	14.39545	0.00046	True	0.22659
6VAX-F	2648	BLOOD ALUMINIUM NORMAL	3	1	1	2647	2	604573	114.15691	10.35405	1258.61897	0.01303	True	0.03776
6VAX-F	2648	BLOOD AMINO ACID LEVEL ABNORMAL	1	1	1	2647	0	604575	-100.00000	-100.00000	-100.00000	0.00436	True	0.03776
6VAX-F	2648	BLOOD AMINO ACID LEVEL INCREASED	2	1	1	2647	1	604574	228.31382	14.28379	3649.39553	0.00870	True	0.03776
6VAX-F	2648	BLOOD AMYLASE DECREASED	9	1	1	2647	8	604567	28.53923	3.57061	228.10887	0.03857	True	0.03776
6VAX-F	2648	BLOOD AMYLASE NORMAL	48	1	1	2647	47	604528	4.85774	0.67045	35.19651	0.18924	False	0.03776
6VAX-F	2648	BLOOD ANTIDIURETIC HORMONE DECREASED	1	1	1	2647	0	604575	-100.00000	-100.00000	-100.00000	0.00436	True	0.03776
6VAX-F	2648	BLOOD BETA-D-GLUCAN NORMAL	1	1	1	2647	0	604575	-100.00000	-100.00000	-100.00000	0.00436	True	0.03776
6VAX-F	2648	BLOOD BICARBONATE	13	2	2	2646	11	604564	41.51160	9.20542	187.19547	0.00144	True	0.07553
6VAX-F	2648	BLOOD BICARBONATE DECREASED	87	8	8	2640	79	604496	23.12039	11.18431	47.79484	0.00000	True	0.30211
6VAX-F	2648	BLOOD BICARBONATE INCREASED	21	2	2	2646	19	604556	24.03303	5.60064	103.12867	0.00378	True	0.07553
6VAX-F	2648	BLOOD BICARBONATE NORMAL	92	11	11	2637	81	604494	31.00558	16.53555	58.13813	0.00000	True	0.41541
6VAX-F	2648	BLOOD BILIRUBIN	47	2	2	2646	45	604530	10.14728	2.46287	41.80785	0.01805	True	0.07553
6VAX-F	2648	BLOOD BILIRUBIN DECREASED	36	3	3	2645	33	604542	20.75580	6.36948	67.63555	0.00053	True	0.11329
6VAX-F	2648	BLOOD BILIRUBIN INCREASED	412	8	8	2640	404	604171	4.52107	2.24790	9.09294	0.00053	True	0.30211
6VAX-F	2648	BLOOD BILIRUBIN NORMAL	220	10	10	2638	210	604365	10.87209	5.77164	20.47985	0.00000	True	0.37764
6VAX-F	2648	BLOOD BILIRUBIN UNCONJUGATED	13	1	1	2647	12	604563	19.02615	2.47475	146.27523	0.05523	False	0.03776
6VAX-F	2648	BLOOD BILIRUBIN UNCONJUGATED INCREASED	33	1	1	2647	32	604543	7.13481	0.97527	52.19614	0.13431	False	0.03776
6VAX-F	2648	BLOOD BILIRUBIN UNCONJUGATED NORMAL	8	1	1	2647	7	604568	32.61626	4.01417	265.01630	0.03436	True	0.03776
6VAX-F	2648	BLOOD CALCIUM	29	1	1	2647	28	604547	8.15407	1.10981	59.91005	0.11904	False	0.03776
6VAX-F	2648	BLOOD CALCIUM DECREASED	134	8	8	2640	126	604449	14.49612	7.10129	29.59145	0.00000	True	0.30211
6VAX-F	2648	BLOOD CALCIUM INCREASED	104	13	13	2635	91	604484	32.61626	18.26390	58.24716	0.00000	True	0.49094
6VAX-F	2648	BLOOD CALCIUM NORMAL	315	28	28	2620	287	604288	22.27452	15.13897	32.77332	0.00000	True	1.05740
6VAX-F	2648	BLOOD CHLORIDE	28	2	2	2646	26	604549	17.56260	4.17048	73.95907	0.00666	True	0.07553
6VAX-F	2648	BLOOD CHLORIDE INCREASED	68	4	4	2644	64	604511	14.26961	5.20018	39.15671	0.00024	True	0.15106
6VAX-F	2648	BLOOD CHLORIDE NORMAL	353	33	33	2615	320	604255	23.54486	16.48735	33.62340	0.00000	True	1.24622
6VAX-F	2648	BLOOD CHOLESTEROL ESTERASE INCREASED	1	1	1	2647	0	604575	-100.00000	-100.00000	-100.00000	0.00436	True	0.03776
6VAX-F	2648	BLOOD CHOLESTEROL NORMAL	76	1	1	2647	75	604500	3.04418	0.42341	21.88687	0.28263	False	0.03776
6VAX-F	2648	BLOOD CHOLINESTERASE INCREASED	22	4	4	2644	18	604557	50.73640	17.18240	149.81509	0.00000	True	0.15106
6VAX-F	2648	BLOOD CHOLINESTERASE NORMAL	3	2	2	2646	1	604574	456.62764	41.41619	5034.47587	0.00006	True	0.07553
6VAX-F	2648	BLOOD COPPER INCREASED	4	1	1	2647	3	604572	76.10461	7.91863	731.42883	0.01733	True	0.03776
6VAX-F	2648	BLOOD COUNT	84	2	2	2646	82	604493	5.56863	1.37018	22.63186	0.05239	False	0.07553
6VAX-F	2648	BLOOD COUNT ABNORMAL	35	4	4	2644	31	604544	29.45985	10.40639	83.39901	0.00002	True	0.15106
6VAX-F	2648	BLOOD COUNT NORMAL	180	21	21	2627	159	604416	30.15466	19.16081	47.45642	0.00000	True	0.79305
6VAX-F	2648	BLOOD CREATINE	20	2	2	2646	18	604557	25.36820	5.88907	109.27804	0.00343	True	0.07553
6VAX-F	2648	BLOOD CREATINE DECREASED	12	1	1	2647	11	604564	20.75580	2.68057	160.71348	0.05109	False	0.03776
6VAX-F	2648	BLOOD CREATINE NORMAL	20	4	4	2644	16	604559	57.07846	19.09485	170.61932	0.00000	True	0.15106
6VAX-F	2648	BLOOD CREATINE PHOSPHOKINASE	186	3	3	2645	183	604392	3.74285	1.19679	11.70543	0.04863	True	0.11329
6VAX-F	2648	BLOOD CREATINE PHOSPHOKINASE DECREASED	23	1	1	2647	22	604553	10.37790	1.39933	76.96613	0.09563	False	0.03776
6VAX-F	2648	BLOOD CREATINE PHOSPHOKINASE INCREASED	763	8	8	2640	755	603820	2.41922	1.20667	4.85022	0.02031	True	0.30211
6VAX-F	2648	BLOOD CREATINE PHOSPHOKINASE MB	89	2	2	2646	87	604488	5.24859	1.29267	21.31070	0.05803	False	0.07553
6VAX-F	2648	BLOOD CREATINE PHOSPHOKINASE MB DECREASED	2	1	1	2647	1	604574	228.31382	14.28379	3649.39553	0.00870	True	0.03776
6VAX-F	2648	BLOOD CREATINE PHOSPHOKINASE MB NORMAL	33	1	1	2647	32	604543	7.13481	0.97527	52.19614	0.13431	False	0.03776
6VAX-F	2648	BLOOD CREATINE PHOSPHOKINASE NORMAL	372	9	9	2639	363	604212	5.66067	2.92491	10.95530	0.00005	True	0.33988
6VAX-F	2648	BLOOD CREATININE	89	6	6	2642	83	604492	16.50461	7.21337	37.76353	0.00000	True	0.22659
6VAX-F	2648	BLOOD CREATININE DECREASED	89	8	8	2640	81	604494	22.54951	10.91718	46.57618	0.00000	True	0.30211
6VAX-F	2648	BLOOD CREATININE INCREASED	452	9	9	2639	443	604132	4.63843	2.40018	8.96392	0.00020	True	0.33988
6VAX-F	2648	BLOOD CREATININE NORMAL	557	42	42	2606	515	604060	18.61977	13.62660	25.44258	0.00000	True	1.58610
6VAX-F	2648	BLOOD CULTURE	675	9	9	2639	666	603909	3.08532	1.60004	5.94934	0.00327	True	0.33988
6VAX-F	2648	BLOOD CULTURE NEGATIVE	1239	48	48	2600	1191	603384	9.20156	6.91272	12.24826	0.00000	True	1.81269
6VAX-F	2648	BLOOD CULTURE POSITIVE	550	12	12	2636	538	604037	5.09250	2.87763	9.01214	0.00001	True	0.45317
6VAX-F	2648	BLOOD ELASTASE INCREASED	3	1	1	2647	2	604573	114.15691	10.35405	1258.61897	0.01303	True	0.03776
6VAX-F	2648	BLOOD ELECTROLYTES	104	1	1	2647	103	604472	2.21664	0.30940	15.88085	0.36527	False	0.03776
6VAX-F	2648	BLOOD ELECTROLYTES NORMAL	482	49	49	2599	433	604142	25.83690	19.27602	34.63087	0.00000	True	1.85045
6VAX-F	2648	BLOOD FIBRINOGEN	15	1	1	2647	14	604561	16.30813	2.14519	123.97716	0.06345	False	0.03776
6VAX-F	2648	BLOOD FIBRINOGEN DECREASED	32	5	5	2643	27	604548	42.28034	16.29456	109.70695	0.00000	True	0.18882
6VAX-F	2648	BLOOD FIBRINOGEN INCREASED	73	3	3	2645	70	604505	9.78488	3.08289	31.05651	0.00410	True	0.11329
6VAX-F	2648	BLOOD FIBRINOGEN NORMAL	60	8	8	2640	52	604523	35.12520	16.70211	73.86972	0.00000	True	0.30211
6VAX-F	2648	BLOOD FOLATE INCREASED	8	1	1	2647	7	604568	32.61626	4.01417	265.01630	0.03436	True	0.03776
6VAX-F	2648	BLOOD GALACTOSE NORMAL	2	1	1	2647	1	604574	228.31382	14.28379	3649.39553	0.00870	True	0.03776
6VAX-F	2648	BLOOD GASES	56	7	7	2641	49	604526	32.61626	14.78735	71.94127	0.00000	True	0.26435
6VAX-F	2648	BLOOD GASES ABNORMAL	43	4	4	2644	39	604536	23.41680	8.37400	65.48201	0.00004	True	0.15106
6VAX-F	2648	BLOOD GASES NORMAL	77	17	17	2631	60	604515	64.68892	37.80438	110.69234	0.00000	True	0.64199
6VAX-F	2648	BLOOD GLUCOSE	262	4	4	2644	258	604317	3.53975	1.31946	9.49614	0.02865	True	0.15106
6VAX-F	2648	BLOOD GLUCOSE ABNORMAL	76	2	2	2646	74	604501	6.17064	1.51557	25.12385	0.04381	True	0.07553
6VAX-F	2648	BLOOD GLUCOSE DECREASED	297	7	7	2641	290	604285	5.51102	2.60654	11.65198	0.00037	True	0.26435
6VAX-F	2648	BLOOD GLUCOSE INCREASED	908	33	33	2615	875	603700	8.61069	6.09544	12.16385	0.00000	True	1.24622
6VAX-F	2648	BLOOD GLUCOSE NORMAL	1141	45	45	2603	1096	603479	9.37420	6.97476	12.59909	0.00000	True	1.69940
6VAX-F	2648	BLOOD GROUPING	11	1	1	2647	10	604565	22.83138	2.92363	178.29632	0.04694	True	0.03776
6VAX-F	2648	BLOOD HEAVY METAL ABNORMAL	3	1	1	2647	2	604573	114.15691	10.35405	1258.61897	0.01303	True	0.03776
6VAX-F	2648	BLOOD HEAVY METAL INCREASED	29	2	2	2646	27	604548	16.91213	4.02367	71.08435	0.00714	True	0.07553
6VAX-F	2648	BLOOD HOMOCYSTEINE NORMAL	19	2	2	2646	17	604558	26.86045	6.20878	116.20383	0.00309	True	0.07553
6VAX-F	2648	BLOOD IMMUNOGLOBULIN A	103	3	3	2645	100	604475	6.84941	2.17351	21.58468	0.01060	True	0.11329
6VAX-F	2648	BLOOD IMMUNOGLOBULIN A DECREASED	37	4	4	2644	33	604542	27.67440	9.81110	78.06183	0.00002	True	0.15106
6VAX-F	2648	BLOOD IMMUNOGLOBULIN A INCREASED	46	1	1	2647	45	604530	5.07364	0.69961	36.79452	0.18212	False	0.03776
6VAX-F	2648	BLOOD IMMUNOGLOBULIN A NORMAL	118	10	10	2638	108	604467	21.14017	11.07217	40.36308	0.00000	True	0.37764
6VAX-F	2648	BLOOD IMMUNOGLOBULIN E	93	3	3	2645	90	604485	7.61046	2.41053	24.02758	0.00803	True	0.11329
6VAX-F	2648	BLOOD IMMUNOGLOBULIN E INCREASED	125	5	5	2643	120	604455	9.51308	3.89179	23.25374	0.00024	True	0.18882
6VAX-F	2648	BLOOD IMMUNOGLOBULIN E NORMAL	49	7	7	2641	42	604533	38.05230	17.11073	84.62394	0.00000	True	0.26435
6VAX-F	2648	BLOOD IMMUNOGLOBULIN G	315	3	3	2645	312	604263	2.19533	0.70464	6.83956	0.15981	False	0.11329
6VAX-F	2648	BLOOD IMMUNOGLOBULIN G DECREASED	97	4	4	2644	93	604482	9.81995	3.61211	26.69673	0.00091	True	0.15106
6VAX-F	2648	BLOOD IMMUNOGLOBULIN G INCREASED	138	2	2	2646	136	604439	3.35756	0.83165	13.55525	0.12219	False	0.07553
6VAX-F	2648	BLOOD IMMUNOGLOBULIN G NORMAL	256	12	12	2636	244	604331	11.22855	6.29760	20.02038	0.00000	True	0.45317
6VAX-F	2648	BLOOD IMMUNOGLOBULIN M	330	5	5	2643	325	604250	3.51252	1.45340	8.48894	0.01559	True	0.18882
6VAX-F	2648	BLOOD IMMUNOGLOBULIN M ABNORMAL	9	1	1	2647	8	604567	28.53923	3.57061	228.10887	0.03857	True	0.03776
6VAX-F	2648	BLOOD IMMUNOGLOBULIN M DECREASED	57	2	2	2646	55	604520	8.30232	2.02617	34.01908	0.02589	True	0.07553
6VAX-F	2648	BLOOD IMMUNOGLOBULIN M INCREASED	90	3	3	2645	87	604488	7.87289	2.49205	24.87203	0.00734	True	0.11329
6VAX-F	2648	BLOOD IMMUNOGLOBULIN M NORMAL	146	11	11	2637	135	604440	18.60335	10.07403	34.35412	0.00000	True	0.41541
6VAX-F	2648	BLOOD IRON	36	5	5	2643	31	604544	36.82481	14.33003	94.63110	0.00000	True	0.18882
6VAX-F	2648	BLOOD IRON DECREASED	90	6	6	2642	84	604491	16.30813	7.12987	37.30155	0.00000	True	0.22659
6VAX-F	2648	BLOOD IRON NORMAL	57	2	2	2646	55	604520	8.30232	2.02617	34.01908	0.02589	True	0.07553
6VAX-F	2648	BLOOD KETONE BODY INCREASED	11	1	1	2647	10	604565	22.83138	2.92363	178.29632	0.04694	True	0.03776
6VAX-F	2648	BLOOD KETONE BODY PRESENT	6	1	1	2647	5	604570	45.66276	5.33639	390.72979	0.02588	True	0.03776
6VAX-F	2648	BLOOD LACTATE DEHYDROGENASE	35	4	4	2644	31	604544	29.45985	10.40639	83.39901	0.00002	True	0.15106
6VAX-F	2648	BLOOD LACTATE DEHYDROGENASE DECREASED	13	1	1	2647	12	604563	19.02615	2.47475	146.27523	0.05523	False	0.03776
6VAX-F	2648	BLOOD LACTATE DEHYDROGENASE INCREASED	538	22	22	2626	516	604059	9.73431	6.36414	14.88918	0.00000	True	0.83082
6VAX-F	2648	BLOOD LACTATE DEHYDROGENASE NORMAL	100	13	13	2635	87	604488	34.11586	19.07172	61.02709	0.00000	True	0.49094
6VAX-F	2648	BLOOD LACTIC ACID	44	7	7	2641	37	604538	43.19451	19.27410	96.80168	0.00000	True	0.26435
6VAX-F	2648	BLOOD LACTIC ACID DECREASED	14	2	2	2646	12	604563	38.05230	8.52049	169.94071	0.00167	True	0.07553
6VAX-F	2648	BLOOD LACTIC ACID INCREASED	97	18	18	2630	79	604496	52.02087	31.22322	86.67176	0.00000	True	0.67976
6VAX-F	2648	BLOOD LACTIC ACID NORMAL	78	14	14	2634	64	604511	49.94365	28.04644	88.93707	0.00000	True	0.52870
6VAX-F	2648	BLOOD MAGNESIUM DECREASED	35	4	4	2644	31	604544	29.45985	10.40639	83.39901	0.00002	True	0.15106
6VAX-F	2648	BLOOD MAGNESIUM INCREASED	35	2	2	2646	33	604542	13.83720	3.32198	57.63670	0.01028	True	0.07553
6VAX-F	2648	BLOOD MAGNESIUM NORMAL	128	9	9	2639	119	604456	17.26743	8.77853	33.96515	0.00000	True	0.33988
6VAX-F	2648	BLOOD MERCURY	12	1	1	2647	11	604564	20.75580	2.68057	160.71348	0.05109	False	0.03776
6VAX-F	2648	BLOOD MERCURY ABNORMAL	35	1	1	2647	34	604541	6.71511	0.91953	49.03865	0.14184	False	0.03776
6VAX-F	2648	BLOOD MERCURY NORMAL	9	1	1	2647	8	604567	28.53923	3.57061	228.10887	0.03857	True	0.03776
6VAX-F	2648	BLOOD METHAEMOGLOBIN	3	1	1	2647	2	604573	114.15691	10.35405	1258.61897	0.01303	True	0.03776
6VAX-F	2648	BLOOD OSMOLARITY NORMAL	5	2	2	2646	3	604572	152.20921	25.44289	910.57455	0.00019	True	0.07553
6VAX-F	2648	BLOOD PH	5	1	1	2647	4	604571	57.07846	6.38156	510.52564	0.02161	True	0.03776
6VAX-F	2648	BLOOD PH DECREASED	89	13	13	2635	76	604499	39.05368	21.71303	70.24308	0.00000	True	0.49094
6VAX-F	2648	BLOOD PH INCREASED	23	3	3	2645	20	604555	34.24707	10.18269	115.18199	0.00014	True	0.11329
6VAX-F	2648	BLOOD PH NORMAL	108	16	16	2632	92	604483	39.70675	23.38264	67.42722	0.00000	True	0.60423
6VAX-F	2648	BLOOD PHOSPHORUS	28	1	1	2647	27	604548	8.45607	1.14945	62.20812	0.11518	False	0.03776
6VAX-F	2648	BLOOD PHOSPHORUS DECREASED	33	4	4	2644	29	604546	31.49156	11.07857	89.51679	0.00001	True	0.15106
6VAX-F	2648	BLOOD PHOSPHORUS INCREASED	28	1	1	2647	27	604548	8.45607	1.14945	62.20812	0.11518	False	0.03776
6VAX-F	2648	BLOOD PHOSPHORUS NORMAL	96	6	6	2642	90	604485	15.22092	6.66683	34.75062	0.00000	True	0.22659
6VAX-F	2648	BLOOD POTASSIUM	28	2	2	2646	26	604549	17.56260	4.17048	73.95907	0.00666	True	0.07553
6VAX-F	2648	BLOOD POTASSIUM DECREASED	217	8	8	2640	209	604366	8.73929	4.31785	17.68821	0.00001	True	0.30211
6VAX-F	2648	BLOOD POTASSIUM INCREASED	155	15	15	2633	140	604435	24.46220	14.38244	41.60623	0.00000	True	0.56647
6VAX-F	2648	BLOOD POTASSIUM NORMAL	436	31	31	2617	405	604170	17.47587	12.15294	25.13023	0.00000	True	1.17069
6VAX-F	2648	BLOOD PRESSURE	376	1	1	2647	375	604200	0.60884	0.08557	4.33203	1.00000	False	0.03776
6VAX-F	2648	BLOOD PRESSURE DECREASED	1029	2	2	2646	1027	603548	0.44462	0.11110	1.77931	0.34090	False	0.07553
6VAX-F	2648	BLOOD PRESSURE DIASTOLIC INCREASED	5	1	1	2647	4	604571	57.07846	6.38156	510.52564	0.02161	True	0.03776
6VAX-F	2648	BLOOD PRESSURE IMMEASURABLE	42	1	1	2647	41	604534	5.56863	0.76625	40.46916	0.16770	False	0.03776
6VAX-F	2648	BLOOD PRESSURE INCREASED	1388	2	2	2646	1386	603189	0.32946	0.08236	1.31797	0.14599	False	0.07553
6VAX-F	2648	BLOOD PRESSURE SYSTOLIC INCREASED	20	1	1	2647	19	604556	12.01652	1.60918	89.73289	0.08370	False	0.03776
6VAX-F	2648	BLOOD PRODUCT TRANSFUSION	253	3	3	2645	250	604325	2.73977	0.87822	8.54724	0.09981	False	0.11329
6VAX-F	2648	BLOOD PROLACTIN	9	1	1	2647	8	604567	28.53923	3.57061	228.10887	0.03857	True	0.03776
6VAX-F	2648	BLOOD PROLACTIN NORMAL	17	1	1	2647	16	604559	14.26961	1.89302	107.56480	0.07160	False	0.03776
6VAX-F	2648	BLOOD PYRUVIC ACID	13	3	3	2645	10	604565	68.49415	18.86075	248.74131	0.00002	True	0.11329
6VAX-F	2648	BLOOD PYRUVIC ACID NORMAL	4	2	2	2646	2	604573	228.31382	32.17188	1620.27205	0.00011	True	0.07553
6VAX-F	2648	BLOOD SELENIUM DECREASED	4	1	1	2647	3	604572	76.10461	7.91863	731.42883	0.01733	True	0.03776
6VAX-F	2648	BLOOD SELENIUM NORMAL	6	1	1	2647	5	604570	45.66276	5.33639	390.72979	0.02588	True	0.03776
6VAX-F	2648	BLOOD SMEAR TEST ABNORMAL	19	1	1	2647	18	604557	12.68410	1.69385	94.98282	0.07968	False	0.03776
6VAX-F	2648	BLOOD SMEAR TEST NORMAL	14	1	1	2647	13	604562	17.56260	2.29824	134.20945	0.05935	False	0.03776
6VAX-F	2648	BLOOD SODIUM	14	2	2	2646	12	604563	38.05230	8.52049	169.94071	0.00167	True	0.07553
6VAX-F	2648	BLOOD SODIUM DECREASED	292	10	10	2638	282	604293	8.09623	4.31396	15.19465	0.00000	True	0.37764
6VAX-F	2648	BLOOD SODIUM INCREASED	48	2	2	2646	46	604529	9.92669	2.41091	40.87219	0.01878	True	0.07553
6VAX-F	2648	BLOOD SODIUM NORMAL	481	40	40	2608	441	604134	20.70874	15.01668	28.55835	0.00000	True	1.51057
6VAX-F	2648	BLOOD TEST	3503	40	40	2608	3463	601112	2.63718	1.93551	3.59323	0.00000	True	1.51057
6VAX-F	2648	BLOOD TEST ABNORMAL	474	11	11	2637	463	604112	5.42430	2.98670	9.85137	0.00001	True	0.41541
6VAX-F	2648	BLOOD TEST NORMAL	1910	51	51	2597	1859	602716	6.26359	4.75497	8.25084	0.00000	True	1.92598
6VAX-F	2648	BLOOD THROMBIN INCREASED	2	1	1	2647	1	604574	228.31382	14.28379	3649.39553	0.00870	True	0.03776
6VAX-F	2648	BLOOD THROMBOPLASTIN	5	1	1	2647	4	604571	57.07846	6.38156	510.52564	0.02161	True	0.03776
6VAX-F	2648	BLOOD THYROID STIMULATING HORMONE	250	1	1	2647	249	604326	0.91692	0.12870	6.53276	1.00000	False	0.03776
6VAX-F	2648	BLOOD THYROID STIMULATING HORMONE DECREASED	107	1	1	2647	106	604469	2.15390	0.30072	15.42725	0.37354	False	0.03776
6VAX-F	2648	BLOOD THYROID STIMULATING HORMONE INCREASED	60	5	5	2643	55	604520	20.75580	8.31538	51.80799	0.00001	True	0.18882
6VAX-F	2648	BLOOD THYROID STIMULATING HORMONE NORMAL	340	5	5	2643	335	604240	3.40767	1.41029	8.23389	0.01749	True	0.18882
6VAX-F	2648	BLOOD TRIGLYCERIDES INCREASED	61	1	1	2647	60	604515	3.80523	0.52755	27.44746	0.23403	False	0.03776
6VAX-F	2648	BLOOD TRIGLYCERIDES NORMAL	60	2	2	2646	58	604517	7.87289	1.92383	32.21817	0.02847	True	0.07553
6VAX-F	2648	BLOOD UREA	51	1	1	2647	50	604525	4.56628	0.63101	33.04377	0.19980	False	0.03776
6VAX-F	2648	BLOOD UREA DECREASED	90	7	7	2641	83	604492	19.25538	8.91129	41.60676	0.00000	True	0.26435
6VAX-F	2648	BLOOD UREA INCREASED	346	8	8	2640	338	604237	5.40388	2.68328	10.88292	0.00017	True	0.30211
6VAX-F	2648	BLOOD UREA NORMAL	451	32	32	2616	419	604156	17.43686	12.19650	24.92879	0.00000	True	1.20846
6VAX-F	2648	BLOOD URIC ACID DECREASED	14	1	1	2647	13	604562	17.56260	2.29824	134.20945	0.05935	False	0.03776
6VAX-F	2648	BLOOD URIC ACID INCREASED	49	1	1	2647	48	604527	4.75654	0.65677	34.44844	0.19278	False	0.03776
6VAX-F	2648	BLOOD URIC ACID NORMAL	89	7	7	2641	82	604493	19.49020	9.01666	42.12959	0.00000	True	0.26435
6VAX-F	2648	BLOOD URINE PRESENT	209	3	3	2645	206	604369	3.32496	1.06426	10.38782	0.06432	False	0.11329
6VAX-F	2648	BODY FAT DISORDER	1	1	1	2647	0	604575	-100.00000	-100.00000	-100.00000	0.00436	True	0.03776
6VAX-F	2648	BODY HEIGHT	13	4	4	2644	9	604566	101.47281	31.26803	329.30539	0.00000	True	0.15106
6VAX-F	2648	BODY HEIGHT ABOVE NORMAL	3	2	2	2646	1	604574	456.62764	41.41619	5034.47587	0.00006	True	0.07553
6VAX-F	2648	BODY HEIGHT BELOW NORMAL	5	3	3	2645	2	604573	342.47073	57.24649	2048.79273	0.00000	True	0.11329
6VAX-F	2648	BODY TEMPERATURE	468	6	6	2642	462	604113	2.96511	1.32641	6.62835	0.01779	True	0.22659
6VAX-F	2648	BODY TEMPERATURE ABNORMAL	16	1	1	2647	15	604560	15.22092	2.01124	115.19084	0.06754	False	0.03776
6VAX-F	2648	BODY TEMPERATURE DECREASED	370	16	16	2632	354	604221	10.31927	6.26212	17.00500	0.00000	True	0.60423
6VAX-F	2648	BODY TEMPERATURE INCREASED	7983	176	176	2472	7807	596768	5.14708	4.45484	5.94688	0.00000	True	6.64653
6VAX-F	2648	BODY TEMPERATURE NORMAL	187	7	7	2641	180	604395	8.87887	4.17687	18.87402	0.00002	True	0.26435
6VAX-F	2648	BONE MARROW FAILURE	16	1	1	2647	15	604560	15.22092	2.01124	115.19084	0.06754	False	0.03776
6VAX-F	2648	BONE MARROW MYELOGRAM ABNORMAL	11	2	2	2646	9	604566	50.73640	10.96729	234.71467	0.00102	True	0.07553
6VAX-F	2648	BORDETELLA INFECTION	5	1	1	2647	4	604571	57.07846	6.38156	510.52564	0.02161	True	0.03776
6VAX-F	2648	BORDETELLA TEST	56	1	1	2647	55	604520	4.15116	0.57466	29.98680	0.21710	False	0.03776
6VAX-F	2648	BORDETELLA TEST NEGATIVE	20	3	3	2645	17	604558	40.29067	11.81434	137.40406	0.00009	True	0.11329
6VAX-F	2648	BORDETELLA TEST POSITIVE	294	7	7	2641	287	604288	5.56863	2.63355	11.77486	0.00035	True	0.26435
6VAX-F	2648	BORRELIA TEST NEGATIVE	429	3	3	2645	426	604149	1.60784	0.51683	5.00199	0.44158	False	0.11329
6VAX-F	2648	BOWEL MOVEMENT IRREGULARITY	95	3	3	2645	92	604483	7.44502	2.35908	23.49575	0.00851	True	0.11329
6VAX-F	2648	BRADYCARDIA	1034	48	48	2600	986	603589	11.11467	8.34019	14.81212	0.00000	True	1.81269
6VAX-F	2648	BRAIN HYPOXIA	4	1	1	2647	3	604572	76.10461	7.91863	731.42883	0.01733	True	0.03776
6VAX-F	2648	BRAIN INJURY	118	1	1	2647	117	604458	1.95140	0.27268	13.96474	0.40295	False	0.03776
6VAX-F	2648	BRAIN MALFORMATION	7	2	2	2646	5	604570	91.32553	17.72580	470.52057	0.00039	True	0.07553
6VAX-F	2648	BRAIN NEOPLASM	45	1	1	2647	44	604531	5.18895	0.71516	37.64919	0.17854	False	0.03776
6VAX-F	2648	BRAIN OEDEMA	298	6	6	2642	292	604283	4.69138	2.09234	10.51887	0.00215	True	0.22659
6VAX-F	2648	BRAIN SCAN ABNORMAL	41	1	1	2647	40	604535	5.70785	0.78495	41.50539	0.16405	False	0.03776
6VAX-F	2648	BRAIN SCAN NORMAL	94	9	9	2639	85	604490	24.17440	12.17402	48.00402	0.00000	True	0.33988
6VAX-F	2648	BRAIN STEM AUDITORY EVOKED RESPONSE ABNORMAL	29	2	2	2646	27	604548	16.91213	4.02367	71.08435	0.00714	True	0.07553
6VAX-F	2648	BRAIN STEM AUDITORY EVOKED RESPONSE NORMAL	57	5	5	2643	52	604523	21.95325	8.77579	54.91760	0.00001	True	0.18882
6VAX-F	2648	BREATH HOLDING	216	12	12	2636	204	604371	13.43022	7.51239	24.00979	0.00000	True	0.45317
6VAX-F	2648	BREATH SOUNDS	14	1	1	2647	13	604562	17.56260	2.29824	134.20945	0.05935	False	0.03776
6VAX-F	2648	BREATH SOUNDS ABNORMAL	258	11	11	2637	247	604328	10.16782	5.56478	18.57838	0.00000	True	0.41541
6VAX-F	2648	BRONCHIAL DISORDER	20	1	1	2647	19	604556	12.01652	1.60918	89.73289	0.08370	False	0.03776
6VAX-F	2648	BRONCHIAL OBSTRUCTION	20	1	1	2647	19	604556	12.01652	1.60918	89.73289	0.08370	False	0.03776
6VAX-F	2648	BRONCHIOLITIS	313	13	13	2635	300	604275	9.89360	5.68563	17.21591	0.00000	True	0.49094
6VAX-F	2648	BRONCHITIS	1187	25	25	2623	1162	603413	4.91209	3.31132	7.28670	0.00000	True	0.94411
6VAX-F	2648	BRONCHITIS CHRONIC	27	1	1	2647	26	604549	8.78130	1.19202	64.68934	0.11131	False	0.03776
6VAX-F	2648	BRONCHOPNEUMONIA	108	4	4	2644	104	604471	8.78130	3.23713	23.82089	0.00135	True	0.15106
6VAX-F	2648	BRONCHOPULMONARY DISEASE	3	1	1	2647	2	604573	114.15691	10.35405	1258.61897	0.01303	True	0.03776
6VAX-F	2648	BRONCHOSPASM	340	2	2	2646	338	604237	1.35097	0.33666	5.42122	0.66296	False	0.07553
6VAX-F	2648	BRUXISM	110	3	3	2645	107	604468	6.40132	2.03354	20.15052	0.01265	True	0.11329
6VAX-F	2648	BUNDLE BRANCH BLOCK RIGHT	35	1	1	2647	34	604541	6.71511	0.91953	49.03865	0.14184	False	0.03776
6VAX-F	2648	BUTTERFLY RASH	33	1	1	2647	32	604543	7.13481	0.97527	52.19614	0.13431	False	0.03776
6VAX-F	2648	C-REACTIVE PROTEIN	453	12	12	2636	441	604134	6.21262	3.50575	11.00952	0.00000	True	0.45317
6VAX-F	2648	C-REACTIVE PROTEIN DECREASED	58	4	4	2644	54	604521	16.91213	6.12943	46.66348	0.00013	True	0.15106
6VAX-F	2648	C-REACTIVE PROTEIN INCREASED	2334	121	121	2527	2213	602362	12.48349	10.43791	14.92996	0.00000	True	4.56949
6VAX-F	2648	C-REACTIVE PROTEIN NORMAL	1145	98	98	2550	1047	603528	21.37035	17.43544	26.19331	0.00000	True	3.70091
6VAX-F	2648	C1 ESTERASE INHIBITOR TEST	8	1	1	2647	7	604568	32.61626	4.01417	265.01630	0.03436	True	0.03776
6VAX-F	2648	CAESAREAN SECTION	400	1	1	2647	399	604176	0.57222	0.08043	4.07081	1.00000	False	0.03776
6VAX-F	2648	CAFE AU LAIT SPOTS	3	1	1	2647	2	604573	114.15691	10.35405	1258.61897	0.01303	True	0.03776
6VAX-F	2648	CALCIUM IONISED NORMAL	8	1	1	2647	7	604568	32.61626	4.01417	265.01630	0.03436	True	0.03776
6VAX-F	2648	CAMPYLOBACTER GASTROENTERITIS	7	1	1	2647	6	604569	38.05230	4.58259	315.97384	0.03013	True	0.03776
6VAX-F	2648	CAMPYLOBACTER INFECTION	12	1	1	2647	11	604564	20.75580	2.68057	160.71348	0.05109	False	0.03776
6VAX-F	2648	CAMPYLOBACTER TEST POSITIVE	23	2	2	2646	21	604554	21.74417	5.10093	92.69075	0.00453	True	0.07553
6VAX-F	2648	CANDIDA TEST POSITIVE	14	2	2	2646	12	604563	38.05230	8.52049	169.94071	0.00167	True	0.07553
6VAX-F	2648	CAPILLARY DISORDER	15	1	1	2647	14	604561	16.30813	2.14519	123.97716	0.06345	False	0.03776
6VAX-F	2648	CAPILLARY FRAGILITY INCREASED	9	2	2	2646	7	604568	65.23252	13.55731	313.87366	0.00067	True	0.07553
6VAX-F	2648	CAPILLARY NAIL REFILL TEST	18	4	4	2644	14	604561	65.23252	21.48593	198.04967	0.00000	True	0.15106
6VAX-F	2648	CAPILLARY NAIL REFILL TEST ABNORMAL	21	3	3	2645	18	604557	38.05230	11.21535	129.10682	0.00010	True	0.11329
6VAX-F	2648	CARBON DIOXIDE DECREASED	117	4	4	2644	113	604462	8.08191	2.98370	21.89134	0.00181	True	0.15106
6VAX-F	2648	CARBON DIOXIDE INCREASED	25	1	1	2647	24	604551	9.51308	1.28739	70.29633	0.10350	False	0.03776
6VAX-F	2648	CARBOXYHAEMOGLOBIN INCREASED	2	1	1	2647	1	604574	228.31382	14.28379	3649.39553	0.00870	True	0.03776
6VAX-F	2648	CARDIAC ARREST	767	10	10	2638	757	603818	3.01603	1.61806	5.62185	0.00233	True	0.37764
6VAX-F	2648	CARDIAC DISORDER	240	5	5	2643	235	604340	4.85774	2.00488	11.77013	0.00430	True	0.18882
6VAX-F	2648	CARDIAC FAILURE	200	3	3	2645	197	604378	3.47686	1.11247	10.86646	0.05793	False	0.11329
6VAX-F	2648	CARDIAC FUNCTION TEST	40	1	1	2647	39	604536	5.85420	0.80457	42.59605	0.16039	False	0.03776
6VAX-F	2648	CARDIAC FUNCTION TEST ABNORMAL	5	1	1	2647	4	604571	57.07846	6.38156	510.52564	0.02161	True	0.03776
6VAX-F	2648	CARDIAC FUNCTION TEST NORMAL	60	2	2	2646	58	604517	7.87289	1.92383	32.21817	0.02847	True	0.07553
6VAX-F	2648	CARDIAC IMAGING PROCEDURE ABNORMAL	7	1	1	2647	6	604569	38.05230	4.58259	315.97384	0.03013	True	0.03776
6VAX-F	2648	CARDIAC MASSAGE	20	1	1	2647	19	604556	12.01652	1.60918	89.73289	0.08370	False	0.03776
6VAX-F	2648	CARDIAC MONITORING	136	2	2	2646	134	604441	3.40767	0.84393	13.75965	0.11932	False	0.07553
6VAX-F	2648	CARDIAC MONITORING ABNORMAL	15	1	1	2647	14	604561	16.30813	2.14519	123.97716	0.06345	False	0.03776
6VAX-F	2648	CARDIAC MONITORING NORMAL	45	4	4	2644	41	604534	22.27452	7.98417	62.14225	0.00005	True	0.15106
6VAX-F	2648	CARDIAC MURMUR	105	7	7	2641	98	604477	16.30813	7.58220	35.07626	0.00000	True	0.26435
6VAX-F	2648	CARDIAC OUTPUT	2	1	1	2647	1	604574	228.31382	14.28379	3649.39553	0.00870	True	0.03776
6VAX-F	2648	CARDIAC SEPTAL DEFECT	2	2	2	2646	0	604575	-100.00000	-100.00000	-100.00000	0.00002	True	0.07553
6VAX-F	2648	CARDIO-RESPIRATORY ARREST	173	5	5	2643	168	604407	6.79505	2.79415	16.52480	0.00105	True	0.18882
6VAX-F	2648	CARDIOGENIC SHOCK	25	1	1	2647	24	604551	9.51308	1.28739	70.29633	0.10350	False	0.03776
6VAX-F	2648	CARDIOLIPIN ANTIBODY NEGATIVE	71	1	1	2647	70	604505	3.26163	0.45323	23.47197	0.26678	False	0.03776
6VAX-F	2648	CARDIOMEGALY	129	1	1	2647	128	604447	1.78370	0.24943	12.75549	0.43098	False	0.03776
6VAX-F	2648	CARDIOMYOPATHY	155	1	1	2647	154	604421	1.48256	0.20759	10.58832	0.49211	False	0.03776
6VAX-F	2648	CARDIOPULMONARY EXERCISE TEST NORMAL	1	1	1	2647	0	604575	-100.00000	-100.00000	-100.00000	0.00436	True	0.03776
6VAX-F	2648	CARDIOPULMONARY FAILURE	23	2	2	2646	21	604554	21.74417	5.10093	92.69075	0.00453	True	0.07553
6VAX-F	2648	CARDIOVASCULAR DISORDER	346	5	5	2643	341	604234	3.34771	1.38564	8.08809	0.01870	True	0.18882
6VAX-F	2648	CARDIOVASCULAR EVALUATION	42	2	2	2646	40	604535	11.41569	2.76032	47.21118	0.01458	True	0.07553
6VAX-F	2648	CARDIOVASCULAR EXAMINATION	15	2	2	2646	13	604562	35.12520	7.93023	155.57942	0.00192	True	0.07553
6VAX-F	2648	CARDIOVASCULAR INSUFFICIENCY	15	3	3	2645	12	604563	57.07846	16.11625	202.15310	0.00004	True	0.11329
6VAX-F	2648	CARDITIS	11	1	1	2647	10	604565	22.83138	2.92363	178.29632	0.04694	True	0.03776
6VAX-F	2648	CARNITINE	5	1	1	2647	4	604571	57.07846	6.38156	510.52564	0.02161	True	0.03776
6VAX-F	2648	CARNITINE NORMAL	10	3	3	2645	7	604568	97.84878	25.31592	378.19614	0.00001	True	0.11329
6VAX-F	2648	CAT SCRATCH DISEASE	4	1	1	2647	3	604572	76.10461	7.91863	731.42883	0.01733	True	0.03776
6VAX-F	2648	CATHETER PLACEMENT	52	2	2	2646	50	604525	9.13255	2.22328	37.51369	0.02182	True	0.07553
6VAX-F	2648	CATHETERISATION CARDIAC NORMAL	41	1	1	2647	40	604535	5.70785	0.78495	41.50539	0.16405	False	0.03776
6VAX-F	2648	CATHETERISATION VENOUS	1	1	1	2647	0	604575	-100.00000	-100.00000	-100.00000	0.00436	True	0.03776
6VAX-F	2648	CD4/CD8 RATIO INCREASED	3	1	1	2647	2	604573	114.15691	10.35405	1258.61897	0.01303	True	0.03776
6VAX-F	2648	CELL-MEDIATED IMMUNE DEFICIENCY	3	1	1	2647	2	604573	114.15691	10.35405	1258.61897	0.01303	True	0.03776
6VAX-F	2648	CELLULITIS	10590	3	3	2645	10587	593988	0.06470	0.02088	0.20050	0.00000	True	0.11329
6VAX-F	2648	CENTRAL NERVOUS SYSTEM INFECTION	12	1	1	2647	11	604564	20.75580	2.68057	160.71348	0.05109	False	0.03776
6VAX-F	2648	CENTRAL NERVOUS SYSTEM INFLAMMATION	78	1	1	2647	77	604498	2.96511	0.41255	21.31120	0.28888	False	0.03776
6VAX-F	2648	CENTRAL VENOUS CATHETERISATION	33	4	4	2644	29	604546	31.49156	11.07857	89.51679	0.00001	True	0.15106
6VAX-F	2648	CENTRAL VENOUS PRESSURE DECREASED	1	1	1	2647	0	604575	-100.00000	-100.00000	-100.00000	0.00436	True	0.03776
6VAX-F	2648	CEREBELLAR HYPOPLASIA	2	1	1	2647	1	604574	228.31382	14.28379	3649.39553	0.00870	True	0.03776
6VAX-F	2648	CEREBELLAR SYNDROME	145	1	1	2647	144	604431	1.58551	0.22190	11.32861	0.46942	False	0.03776
6VAX-F	2648	CEREBRAL ATROPHY	51	4	4	2644	47	604528	19.43096	7.00575	53.89322	0.00008	True	0.15106
6VAX-F	2648	CEREBRAL DISORDER	52	2	2	2646	50	604525	9.13255	2.22328	37.51369	0.02182	True	0.07553
6VAX-F	2648	CEREBRAL HAEMORRHAGE	133	8	8	2640	125	604450	14.61208	7.15687	29.83328	0.00000	True	0.30211
6VAX-F	2648	CEREBRAL HYGROMA	5	1	1	2647	4	604571	57.07846	6.38156	510.52564	0.02161	True	0.03776
6VAX-F	2648	CEREBRAL INFARCTION	106	1	1	2647	105	604470	2.17442	0.30356	15.57554	0.37080	False	0.03776
6VAX-F	2648	CEREBRAL ISCHAEMIA	87	1	1	2647	86	604489	2.65481	0.36986	19.05571	0.31631	False	0.03776
6VAX-F	2648	CEREBRAL PALSY	53	3	3	2645	50	604525	13.69883	4.27539	43.89257	0.00165	True	0.11329
6VAX-F	2648	CEREBRAL VENTRICLE DILATATION	24	1	1	2647	23	604552	9.92669	1.34103	73.48037	0.09958	False	0.03776
6VAX-F	2648	CEREBROVASCULAR ACCIDENT	446	1	1	2647	445	604130	0.51306	0.07214	3.64909	1.00000	False	0.03776
6VAX-F	2648	CHANGE OF BOWEL HABIT	23	1	1	2647	22	604553	10.37790	1.39933	76.96613	0.09563	False	0.03776
6VAX-F	2648	CHAPPED LIPS	70	3	3	2645	67	604508	10.22301	3.21751	32.48162	0.00365	True	0.11329
6VAX-F	2648	CHEILITIS	169	4	4	2644	165	604410	5.53488	2.05443	14.91165	0.00670	True	0.15106
6VAX-F	2648	CHEMOTHERAPY	137	1	1	2647	136	604439	1.67878	0.23486	11.99978	0.45053	False	0.03776
6VAX-F	2648	CHEST X-RAY	1224	14	14	2634	1210	603365	2.64165	1.56195	4.46769	0.00123	True	0.52870
6VAX-F	2648	CHEST X-RAY ABNORMAL	815	21	21	2627	794	603781	6.03853	3.92167	9.29802	0.00000	True	0.79305
6VAX-F	2648	CHEST X-RAY NORMAL	1729	26	26	2622	1703	602872	3.48571	2.37084	5.12482	0.00000	True	0.98187
6VAX-F	2648	CHILD MALTREATMENT SYNDROME	26	3	3	2645	23	604552	29.78006	8.94683	99.12475	0.00020	True	0.11329
6VAX-F	2648	CHILDHOOD DISINTEGRATIVE DISORDER	135	4	4	2644	131	604444	6.97141	2.57977	18.83911	0.00304	True	0.15106
6VAX-F	2648	CHILLS	19150	25	25	2623	19125	585450	0.29845	0.20199	0.44098	0.00000	True	0.94411
6VAX-F	2648	CHLAMYDIA TEST NEGATIVE	58	3	3	2645	55	604520	12.45348	3.89841	39.78269	0.00214	True	0.11329
6VAX-F	2648	CHOKING	390	10	10	2638	380	604195	6.00826	3.21037	11.24454	0.00001	True	0.37764
6VAX-F	2648	CHROMATURIA	235	1	1	2647	234	604341	0.97570	0.13691	6.95327	1.00000	False	0.03776
6VAX-F	2648	CHROMOSOME ANALYSIS ABNORMAL	10	2	2	2646	8	604567	57.07846	12.12635	268.66696	0.00084	True	0.07553
6VAX-F	2648	CHROMOSOME ANALYSIS NORMAL	34	6	6	2642	28	604547	48.92439	20.27446	118.05966	0.00000	True	0.22659
6VAX-F	2648	CHRONIC HEPATITIS B	49	1	1	2647	48	604527	4.75654	0.65677	34.44844	0.19278	False	0.03776
6VAX-F	2648	CHYLOTHORAX	3	2	2	2646	1	604574	456.62764	41.41619	5034.47587	0.00006	True	0.07553
6VAX-F	2648	CIRCADIAN RHYTHM SLEEP DISORDER	14	2	2	2646	12	604563	38.05230	8.52049	169.94071	0.00167	True	0.07553
6VAX-F	2648	CIRCULATORY COLLAPSE	314	9	9	2639	305	604270	6.73713	3.47582	13.05846	0.00001	True	0.33988
6VAX-F	2648	CLONIC CONVULSION	66	3	3	2645	63	604512	10.87209	3.41641	34.59834	0.00309	True	0.11329
6VAX-F	2648	CLONUS	173	19	19	2629	154	604421	28.16859	17.51665	45.29801	0.00000	True	0.71752
6VAX-F	2648	CLOSTRIDIUM DIFFICILE COLITIS	17	1	1	2647	16	604559	14.26961	1.89302	107.56480	0.07160	False	0.03776
6VAX-F	2648	CLOSTRIDIUM TEST NEGATIVE	60	1	1	2647	59	604516	3.86973	0.53634	27.92034	0.23067	False	0.03776
6VAX-F	2648	CLOSTRIDIUM TEST POSITIVE	42	1	1	2647	41	604534	5.56863	0.76625	40.46916	0.16770	False	0.03776
6VAX-F	2648	CLUMSINESS	180	1	1	2647	179	604396	1.27550	0.17875	9.10143	0.54469	False	0.03776
6VAX-F	2648	COAGULATION FACTOR V LEVEL INCREASED	2	1	1	2647	1	604574	228.31382	14.28379	3649.39553	0.00870	True	0.03776
6VAX-F	2648	COAGULATION TEST ABNORMAL	16	3	3	2645	13	604562	52.68781	15.02266	184.78783	0.00004	True	0.11329
6VAX-F	2648	COAGULATION TEST NORMAL	155	21	21	2627	134	604441	35.78052	22.62348	56.58927	0.00000	True	0.79305
6VAX-F	2648	COAGULOPATHY	137	1	1	2647	136	604439	1.67878	0.23486	11.99978	0.45053	False	0.03776
6VAX-F	2648	COGNITIVE DISORDER	854	2	2	2646	852	603723	0.53595	0.13389	2.14537	0.59783	False	0.07553
6VAX-F	2648	COLD AGGLUTININS POSITIVE	6	1	1	2647	5	604570	45.66276	5.33639	390.72979	0.02588	True	0.03776
6VAX-F	2648	COLD SWEAT	1819	17	17	2631	1802	602773	2.15390	1.33804	3.46725	0.00365	True	0.64199
6VAX-F	2648	COLECTOMY	30	2	2	2646	28	604547	16.30813	3.88685	68.42436	0.00763	True	0.07553
6VAX-F	2648	COLITIS	195	5	5	2643	190	604385	6.00826	2.47430	14.58963	0.00177	True	0.18882
6VAX-F	2648	COLITIS ULCERATIVE	121	1	1	2647	120	604455	1.90262	0.26592	13.61278	0.41073	False	0.03776
6VAX-F	2648	COLONOSCOPY ABNORMAL	70	1	1	2647	69	604506	3.30890	0.45971	23.81695	0.26357	False	0.03776
6VAX-F	2648	COMA	1278	9	9	2639	1269	603306	1.61925	0.84150	3.11583	0.13592	False	0.33988
6VAX-F	2648	COMA SCALE	23	1	1	2647	22	604553	10.37790	1.39933	76.96613	0.09563	False	0.03776
6VAX-F	2648	COMA SCALE ABNORMAL	25	4	4	2644	21	604554	43.48835	14.93798	126.60590	0.00000	True	0.15106
6VAX-F	2648	COMA SCALE NORMAL	26	2	2	2646	24	604551	19.02615	4.49875	80.46564	0.00576	True	0.07553
6VAX-F	2648	COMMUNICATION DISORDER	94	2	2	2646	92	604483	4.96334	1.22347	20.13526	0.06387	False	0.07553
6VAX-F	2648	COMPLEMENT FACTOR NORMAL	124	1	1	2647	123	604452	1.85621	0.25949	13.27812	0.41841	False	0.03776
6VAX-F	2648	COMPLEX PARTIAL SEIZURES	64	3	3	2645	61	604514	11.22855	3.52538	35.76357	0.00283	True	0.11329
6VAX-F	2648	COMPUTERISED TOMOGRAM	1534	5	5	2643	1529	603046	0.74661	0.31057	1.79487	0.69627	False	0.18882
6VAX-F	2648	COMPUTERISED TOMOGRAM ABDOMEN ABNORMAL	110	2	2	2646	108	604467	4.22803	1.04452	17.11438	0.08376	False	0.07553
6VAX-F	2648	COMPUTERISED TOMOGRAM ABNORMAL	572	13	13	2635	559	604016	5.30962	3.06779	9.18972	0.00000	True	0.49094
6VAX-F	2648	COMPUTERISED TOMOGRAM HEAD	680	5	5	2643	675	603900	1.69121	0.70222	4.07307	0.22960	False	0.18882
6VAX-F	2648	COMPUTERISED TOMOGRAM HEAD ABNORMAL	125	8	8	2640	117	604458	15.61120	7.63500	31.92007	0.00000	True	0.30211
6VAX-F	2648	COMPUTERISED TOMOGRAM HEAD NORMAL	497	16	16	2632	481	604094	7.59464	4.62199	12.47917	0.00000	True	0.60423
6VAX-F	2648	COMPUTERISED TOMOGRAM NORMAL	1918	14	14	2634	1904	602671	1.67878	0.99372	2.83611	0.05574	False	0.52870
6VAX-F	2648	COMPUTERISED TOMOGRAM THORAX	50	1	1	2647	49	604526	4.65947	0.64363	33.73149	0.19630	False	0.03776
6VAX-F	2648	CONCOMITANT DISEASE PROGRESSION	3	1	1	2647	2	604573	114.15691	10.35405	1258.61897	0.01303	True	0.03776
6VAX-F	2648	CONDITION AGGRAVATED	5796	45	45	2603	5751	598824	1.78649	1.33566	2.38949	0.00028	True	1.69940
6VAX-F	2648	CONDUCT DISORDER	8	2	2	2646	6	604569	76.10461	15.36713	376.90260	0.00052	True	0.07553
6VAX-F	2648	CONFUSIONAL STATE	2046	1	1	2647	2045	602530	0.11164	0.01572	0.79269	0.00219	True	0.03776
6VAX-F	2648	CONGENITAL ANOMALY	208	2	2	2646	206	604369	2.21664	0.55094	8.91834	0.23002	False	0.07553
6VAX-F	2648	CONGENITAL CENTRAL NERVOUS SYSTEM ANOMALY	36	1	1	2647	35	604540	6.52325	0.89399	47.59888	0.14558	False	0.03776
6VAX-F	2648	CONGENITAL CHOROID PLEXUS CYST	5	1	1	2647	4	604571	57.07846	6.38156	510.52564	0.02161	True	0.03776
6VAX-F	2648	CONGENITAL GENERALISED LIPODYSTROPHY	1	1	1	2647	0	604575	-100.00000	-100.00000	-100.00000	0.00436	True	0.03776
6VAX-F	2648	CONGENITAL NEUROLOGICAL DISORDER	2	1	1	2647	1	604574	228.31382	14.28379	3649.39553	0.00870	True	0.03776
6VAX-F	2648	CONGESTIVE CARDIOMYOPATHY	26	5	5	2643	21	604554	54.36043	20.51306	144.05735	0.00000	True	0.18882
6VAX-F	2648	CONJUNCTIVAL HAEMORRHAGE	47	1	1	2647	46	604529	4.96334	0.68472	35.97779	0.18569	False	0.03776
6VAX-F	2648	CONJUNCTIVAL HYPERAEMIA	108	3	3	2645	105	604470	6.52325	2.07166	20.54046	0.01204	True	0.11329
6VAX-F	2648	CONJUNCTIVITIS	1313	23	23	2625	1290	603285	4.07071	2.70006	6.13716	0.00000	True	0.86858
6VAX-F	2648	CONJUNCTIVITIS BACTERIAL	4	1	1	2647	3	604572	76.10461	7.91863	731.42883	0.01733	True	0.03776
6VAX-F	2648	CONJUNCTIVITIS INFECTIVE	53	2	2	2646	51	604524	8.95348	2.18085	36.75852	0.02261	True	0.07553
6VAX-F	2648	CONJUNCTIVITIS VIRAL	9	1	1	2647	8	604567	28.53923	3.57061	228.10887	0.03857	True	0.03776
6VAX-F	2648	CONSCIOUSNESS FLUCTUATING	50	1	1	2647	49	604526	4.65947	0.64363	33.73149	0.19630	False	0.03776
6VAX-F	2648	CONSTIPATION	1231	19	19	2629	1212	603363	3.57918	2.27864	5.62200	0.00000	True	0.71752
6VAX-F	2648	CONTINUOUS POSITIVE AIRWAY PRESSURE	64	6	6	2642	58	604517	23.61867	10.19980	54.69140	0.00000	True	0.22659
6VAX-F	2648	CONTUSION	2750	8	8	2640	2742	601833	0.66612	0.33314	1.33195	0.30842	False	0.30211
6VAX-F	2648	CONVULSION	14039	153	153	2495	13886	590689	2.51563	2.15510	2.93647	0.00000	True	5.77795
6VAX-F	2648	CONVULSION NEONATAL	12	1	1	2647	11	604564	20.75580	2.68057	160.71348	0.05109	False	0.03776
6VAX-F	2648	COOMBS DIRECT TEST NEGATIVE	16	2	2	2646	14	604561	32.61626	7.41631	143.44330	0.00219	True	0.07553
6VAX-F	2648	COOMBS DIRECT TEST POSITIVE	44	1	1	2647	43	604532	5.30962	0.73142	38.54449	0.17494	False	0.03776
6VAX-F	2648	COOMBS TEST NEGATIVE	13	2	2	2646	11	604564	41.51160	9.20542	187.19547	0.00144	True	0.07553
6VAX-F	2648	COOMBS TEST POSITIVE	15	2	2	2646	13	604562	35.12520	7.93023	155.57942	0.00192	True	0.07553
6VAX-F	2648	COORDINATION ABNORMAL	1254	3	3	2645	1251	603324	0.54752	0.17646	1.69885	0.39042	False	0.11329
6VAX-F	2648	CORNEAL OPACITY	10	1	1	2647	9	604566	25.36820	3.21500	200.16965	0.04276	True	0.03776
6VAX-F	2648	CORONARY ARTERY ANEURYSM	17	5	5	2643	12	604563	95.13076	33.53740	269.84385	0.00000	True	0.18882
6VAX-F	2648	CORONARY ARTERY DILATATION	30	3	3	2645	27	604548	25.36820	7.70053	83.57159	0.00031	True	0.11329
6VAX-F	2648	CORONARY ARTERY DISEASE	96	1	1	2647	95	604480	2.40330	0.33518	17.23191	0.34268	False	0.03776
6VAX-F	2648	CORONARY ARTERY OCCLUSION	21	1	1	2647	20	604555	11.41569	1.53257	85.03206	0.08769	False	0.03776
6VAX-F	2648	CORRECTIVE LENS USER	25	1	1	2647	24	604551	9.51308	1.28739	70.29633	0.10350	False	0.03776
6VAX-F	2648	CORTICAL DYSPLASIA	2	1	1	2647	1	604574	228.31382	14.28379	3649.39553	0.00870	True	0.03776
6VAX-F	2648	CORYNEBACTERIUM TEST POSITIVE	20	1	1	2647	19	604556	12.01652	1.60918	89.73289	0.08370	False	0.03776
6VAX-F	2648	COUGH	13116	67	67	2581	13049	591526	1.17228	0.92490	1.48581	0.20234	False	2.53021
6VAX-F	2648	COW'S MILK INTOLERANCE	33	3	3	2645	30	604545	22.83138	6.97206	74.76583	0.00041	True	0.11329
6VAX-F	2648	COXSACKIE VIRUS TEST	8	1	1	2647	7	604568	32.61626	4.01417	265.01630	0.03436	True	0.03776
6VAX-F	2648	CRANIECTOMY	4	1	1	2647	3	604572	76.10461	7.91863	731.42883	0.01733	True	0.03776
6VAX-F	2648	CREATININE RENAL CLEARANCE INCREASED	6	1	1	2647	5	604570	45.66276	5.33639	390.72979	0.02588	True	0.03776
6VAX-F	2648	CREATININE RENAL CLEARANCE NORMAL	3	1	1	2647	2	604573	114.15691	10.35405	1258.61897	0.01303	True	0.03776
6VAX-F	2648	CREATININE URINE INCREASED	8	1	1	2647	7	604568	32.61626	4.01417	265.01630	0.03436	True	0.03776
6VAX-F	2648	CREPITATIONS	67	4	4	2644	63	604512	14.49612	5.28023	39.79702	0.00022	True	0.15106
6VAX-F	2648	CROHN'S DISEASE	114	1	1	2647	113	604462	2.02048	0.28225	14.46333	0.39242	False	0.03776
6VAX-F	2648	CRYING	12771	383	383	2265	12388	592187	7.05878	6.42387	7.75644	0.00000	True	14.46375
6VAX-F	2648	CRYOTHERAPY	12	1	1	2647	11	604564	20.75580	2.68057	160.71348	0.05109	False	0.03776
6VAX-F	2648	CRYPTORCHISM	4	1	1	2647	3	604572	76.10461	7.91863	731.42883	0.01733	True	0.03776
6VAX-F	2648	CRYSTAL URINE PRESENT	12	1	1	2647	11	604564	20.75580	2.68057	160.71348	0.05109	False	0.03776
6VAX-F	2648	CSF BACTERIA IDENTIFIED	4	1	1	2647	3	604572	76.10461	7.91863	731.42883	0.01733	True	0.03776
6VAX-F	2648	CSF BACTERIA TEST	1	1	1	2647	0	604575	-100.00000	-100.00000	-100.00000	0.00436	True	0.03776
6VAX-F	2648	CSF CELL COUNT	69	7	7	2641	62	604513	25.77737	11.80966	56.26520	0.00000	True	0.26435
6VAX-F	2648	CSF CELL COUNT ABNORMAL	25	1	1	2647	24	604551	9.51308	1.28739	70.29633	0.10350	False	0.03776
6VAX-F	2648	CSF CELL COUNT INCREASED	99	6	6	2642	93	604482	14.72992	6.45716	33.60158	0.00001	True	0.22659
6VAX-F	2648	CSF CELL COUNT NORMAL	188	4	4	2644	184	604391	4.96334	1.84452	13.35564	0.00966	True	0.15106
6VAX-F	2648	CSF CULTURE	68	1	1	2647	67	604508	3.40767	0.47323	24.53823	0.25711	False	0.03776
6VAX-F	2648	CSF CULTURE NEGATIVE	511	25	25	2623	486	604089	11.74454	7.87150	17.52323	0.00000	True	0.94411
6VAX-F	2648	CSF CULTURE POSITIVE	162	7	7	2641	155	604420	10.31095	4.83952	21.96823	0.00001	True	0.26435
6VAX-F	2648	CSF GLUCOSE	82	4	4	2644	78	604497	11.70840	4.28970	31.95713	0.00048	True	0.15106
6VAX-F	2648	CSF GLUCOSE DECREASED	63	5	5	2643	58	604517	19.68223	7.90088	49.03124	0.00001	True	0.18882
6VAX-F	2648	CSF GLUCOSE INCREASED	75	3	3	2645	72	604503	9.51308	2.99923	30.17390	0.00443	True	0.11329
6VAX-F	2648	CSF GLUCOSE NORMAL	341	12	12	2636	329	604246	8.32756	4.68707	14.79565	0.00000	True	0.45317
6VAX-F	2648	CSF IMMUNOGLOBULIN INCREASED	64	1	1	2647	63	604512	3.62403	0.50281	26.12028	0.24400	False	0.03776
6VAX-F	2648	CSF LACTATE	31	4	4	2644	27	604548	33.82427	11.84358	96.59925	0.00001	True	0.15106
6VAX-F	2648	CSF LACTATE NORMAL	45	7	7	2641	38	604537	42.05781	18.79872	94.09466	0.00000	True	0.26435
6VAX-F	2648	CSF LYMPHOCYTE COUNT INCREASED	67	1	1	2647	66	604509	3.45930	0.48029	24.91550	0.25385	False	0.03776
6VAX-F	2648	CSF NEUTROPHIL COUNT INCREASED	29	1	1	2647	28	604547	8.15407	1.10981	59.91005	0.11904	False	0.03776
6VAX-F	2648	CSF OLIGOCLONAL BAND ABSENT	97	2	2	2646	95	604480	4.80661	1.18539	19.49023	0.06746	False	0.07553
6VAX-F	2648	CSF PROTEIN	105	5	5	2643	100	604475	11.41569	4.65348	28.00441	0.00011	True	0.18882
6VAX-F	2648	CSF PROTEIN DECREASED	32	1	1	2647	31	604544	7.36496	1.00575	53.93232	0.13052	False	0.03776
6VAX-F	2648	CSF PROTEIN INCREASED	617	10	10	2638	607	603968	3.76135	2.01587	7.01816	0.00047	True	0.37764
6VAX-F	2648	CSF PROTEIN NORMAL	293	14	14	2634	279	604296	11.45661	6.70673	19.57047	0.00000	True	0.52870
6VAX-F	2648	CSF RED BLOOD CELL COUNT POSITIVE	50	3	3	2645	47	604528	14.57322	4.53873	46.79257	0.00139	True	0.11329
6VAX-F	2648	CSF TEST	218	5	5	2643	213	604362	5.35948	2.20984	12.99821	0.00286	True	0.18882
6VAX-F	2648	CSF TEST ABNORMAL	1154	12	12	2636	1142	603433	2.39909	1.36016	4.23159	0.00557	True	0.45317
6VAX-F	2648	CSF TEST NORMAL	513	24	24	2624	489	604086	11.20559	7.45146	16.85107	0.00000	True	0.90634
6VAX-F	2648	CSF VIRUS IDENTIFIED	16	1	1	2647	15	604560	15.22092	2.01124	115.19084	0.06754	False	0.03776
6VAX-F	2648	CSF VIRUS NO ORGANISMS OBSERVED	61	3	3	2645	58	604517	11.80934	3.70253	37.66630	0.00247	True	0.11329
6VAX-F	2648	CSF WHITE BLOOD CELL COUNT	32	2	2	2646	30	604545	15.22092	3.63933	63.65917	0.00864	True	0.07553
6VAX-F	2648	CSF WHITE BLOOD CELL COUNT INCREASED	281	6	6	2642	275	604300	4.98139	2.22057	11.17475	0.00160	True	0.22659
6VAX-F	2648	CSF WHITE BLOOD CELL COUNT NEGATIVE	206	4	4	2644	202	604373	4.52107	1.68174	12.15410	0.01313	True	0.15106
6VAX-F	2648	CULTURE	340	5	5	2643	335	604240	3.40767	1.41029	8.23389	0.01749	True	0.18882
6VAX-F	2648	CULTURE NEGATIVE	412	10	10	2638	402	604173	5.67945	3.03602	10.62447	0.00002	True	0.37764
6VAX-F	2648	CULTURE POSITIVE	211	1	1	2647	210	604365	1.08721	0.15249	7.75164	0.60240	False	0.03776
6VAX-F	2648	CULTURE STOOL	193	5	5	2643	188	604387	6.07218	2.50032	14.74663	0.00169	True	0.18882
6VAX-F	2648	CULTURE STOOL NEGATIVE	381	25	25	2623	356	604219	16.03327	10.70741	24.00822	0.00000	True	0.94411
6VAX-F	2648	CULTURE STOOL POSITIVE	170	13	13	2635	157	604418	18.90497	10.75154	33.24153	0.00000	True	0.49094
6VAX-F	2648	CULTURE THROAT	122	5	5	2643	117	604458	9.75700	3.98974	23.86094	0.00021	True	0.18882
6VAX-F	2648	CULTURE THROAT NEGATIVE	195	3	3	2645	192	604383	3.56740	1.14118	11.15192	0.05452	False	0.11329
6VAX-F	2648	CULTURE THROAT POSITIVE	63	4	4	2644	59	604516	15.47890	5.62669	42.58210	0.00018	True	0.15106
6VAX-F	2648	CULTURE URINE	312	6	6	2642	306	604269	4.47674	1.99736	10.03387	0.00270	True	0.22659
6VAX-F	2648	CULTURE URINE NEGATIVE	680	36	36	2612	644	603931	12.76288	9.14352	17.81493	0.00000	True	1.35952
6VAX-F	2648	CULTURE URINE POSITIVE	134	18	18	2630	116	604459	35.42801	21.59463	58.12295	0.00000	True	0.67976
6VAX-F	2648	CULTURE WOUND	42	2	2	2646	40	604535	11.41569	2.76032	47.21118	0.01458	True	0.07553
6VAX-F	2648	CULTURE WOUND POSITIVE	39	1	1	2647	38	604537	6.00826	0.82521	43.74555	0.15671	False	0.03776
6VAX-F	2648	CUSHINGOID	11	1	1	2647	10	604565	22.83138	2.92363	178.29632	0.04694	True	0.03776
6VAX-F	2648	CUTANEOUS VASCULITIS	14	1	1	2647	13	604562	17.56260	2.29824	134.20945	0.05935	False	0.03776
6VAX-F	2648	CYANOSIS	4522	222	222	2426	4300	600275	11.78736	10.35679	13.41555	0.00000	True	8.38369
6VAX-F	2648	CYANOSIS CENTRAL	24	1	1	2647	23	604552	9.92669	1.34103	73.48037	0.09958	False	0.03776
6VAX-F	2648	CYST	211	1	1	2647	210	604365	1.08721	0.15249	7.75164	0.60240	False	0.03776
6VAX-F	2648	CYSTOGRAM	7	1	1	2647	6	604569	38.05230	4.58259	315.97384	0.03013	True	0.03776
6VAX-F	2648	CYSTOGRAM ABNORMAL	1	1	1	2647	0	604575	-100.00000	-100.00000	-100.00000	0.00436	True	0.03776
6VAX-F	2648	CYSTOSCOPY NORMAL	6	1	1	2647	5	604570	45.66276	5.33639	390.72979	0.02588	True	0.03776
6VAX-F	2648	CYTOGENETIC ABNORMALITY	3	1	1	2647	2	604573	114.15691	10.35405	1258.61897	0.01303	True	0.03776
6VAX-F	2648	CYTOGENETIC ANALYSIS	72	4	4	2644	68	604507	13.43022	4.90286	36.78892	0.00029	True	0.15106
6VAX-F	2648	CYTOGENETIC ANALYSIS ABNORMAL	26	1	1	2647	25	604550	9.13255	1.23787	67.37651	0.10741	False	0.03776
6VAX-F	2648	CYTOGENETIC ANALYSIS NORMAL	79	5	5	2643	74	604501	15.42661	6.24157	38.12829	0.00003	True	0.18882
6VAX-F	2648	CYTOLOGY ABNORMAL	31	1	1	2647	30	604545	7.61046	1.03820	55.78789	0.12671	False	0.03776
6VAX-F	2648	CYTOLOGY NORMAL	19	1	1	2647	18	604557	12.68410	1.69385	94.98282	0.07968	False	0.03776
6VAX-F	2648	CYTOMEGALOVIRUS ANTIBODY POSITIVE	23	1	1	2647	22	604553	10.37790	1.39933	76.96613	0.09563	False	0.03776
6VAX-F	2648	CYTOMEGALOVIRUS INFECTION	37	3	3	2645	34	604541	20.14534	6.19111	65.55114	0.00058	True	0.11329
6VAX-F	2648	CYTOMEGALOVIRUS TEST	73	4	4	2644	69	604506	13.23558	4.83377	36.24102	0.00031	True	0.15106
6VAX-F	2648	CYTOMEGALOVIRUS TEST NEGATIVE	349	24	24	2624	325	604250	16.86010	11.15757	25.47713	0.00000	True	0.90634
6VAX-F	2648	CYTOMEGALOVIRUS TEST POSITIVE	108	7	7	2641	101	604474	15.82373	7.36258	34.00852	0.00000	True	0.26435
6VAX-F	2648	DANDY-WALKER SYNDROME	2	1	1	2647	1	604574	228.31382	14.28379	3649.39553	0.00870	True	0.03776
6VAX-F	2648	DARK CIRCLES UNDER EYES	66	2	2	2646	64	604511	7.13481	1.74732	29.13340	0.03392	True	0.07553
6VAX-F	2648	DEATH	2766	95	95	2553	2671	601904	8.12048	6.64155	9.92875	0.00000	True	3.58761
6VAX-F	2648	DEATH NEONATAL	30	2	2	2646	28	604547	16.30813	3.88685	68.42436	0.00763	True	0.07553
6VAX-F	2648	DEBRIDEMENT	46	1	1	2647	45	604530	5.07364	0.69961	36.79452	0.18212	False	0.03776
6VAX-F	2648	DECORTICATE POSTURE	6	2	2	2646	4	604571	114.15691	20.91765	623.00493	0.00028	True	0.07553
6VAX-F	2648	DECREASED ACTIVITY	277	8	8	2640	269	604306	6.79000	3.36455	13.70291	0.00004	True	0.30211
6VAX-F	2648	DECREASED APPETITE	5012	95	95	2553	4917	599658	4.41119	3.61373	5.38463	0.00000	True	3.58761
6VAX-F	2648	DECREASED EYE CONTACT	259	23	23	2625	236	604339	22.25092	14.52612	34.08368	0.00000	True	0.86858
6VAX-F	2648	DECREASED IMMUNE RESPONSIVENESS	42	1	1	2647	41	604534	5.56863	0.76625	40.46916	0.16770	False	0.03776
6VAX-F	2648	DEFAECATION URGENCY	25	1	1	2647	24	604551	9.51308	1.28739	70.29633	0.10350	False	0.03776
6VAX-F	2648	DEFICIENCY OF BILE SECRETION	1	1	1	2647	0	604575	-100.00000	-100.00000	-100.00000	0.00436	True	0.03776
6VAX-F	2648	DEFORMITY THORAX	1	1	1	2647	0	604575	-100.00000	-100.00000	-100.00000	0.00436	True	0.03776
6VAX-F	2648	DEHYDRATION	2406	44	44	2604	2362	602213	4.25309	3.16413	5.71683	0.00000	True	1.66163
6VAX-F	2648	DELAYED FONTANELLE CLOSURE	8	2	2	2646	6	604569	76.10461	15.36713	376.90260	0.00052	True	0.07553
6VAX-F	2648	DELUSION	63	1	1	2647	62	604513	3.68248	0.51079	26.54818	0.24069	False	0.03776
6VAX-F	2648	DEMYELINATION	576	1	1	2647	575	604000	0.39707	0.05586	2.82267	0.52874	False	0.03776
6VAX-F	2648	DENTAL EXAMINATION NORMAL	6	1	1	2647	5	604570	45.66276	5.33639	390.72979	0.02588	True	0.03776
6VAX-F	2648	DEPRESSED LEVEL OF CONSCIOUSNESS	1303	50	50	2598	1253	603322	9.11069	6.88521	12.05550	0.00000	True	1.88822
6VAX-F	2648	DEPRESSED MOOD	176	1	1	2647	175	604400	1.30465	0.18281	9.31063	0.53666	False	0.03776
6VAX-F	2648	DEPRESSION	1145	1	1	2647	1144	603431	0.19958	0.02810	1.41754	0.07137	False	0.03776
6VAX-F	2648	DERMATITIS	387	2	2	2646	385	604190	1.18605	0.29571	4.75704	0.68762	False	0.07553
6VAX-F	2648	DERMATITIS ALLERGIC	205	2	2	2646	203	604372	2.24940	0.55903	9.05103	0.22522	False	0.07553
6VAX-F	2648	DERMATITIS ATOPIC	144	13	13	2635	131	604444	22.65710	12.83033	40.01020	0.00000	True	0.49094
6VAX-F	2648	DERMATITIS BULLOUS	5609	10	10	2638	5599	598976	0.40778	0.21954	0.75741	0.00149	True	0.37764
6VAX-F	2648	DERMATITIS DIAPER	158	7	7	2641	151	604424	10.58408	4.96556	22.55995	0.00001	True	0.26435
6VAX-F	2648	DERMATITIS EXFOLIATIVE	210	1	1	2647	209	604366	1.09241	0.15321	7.78890	0.60066	False	0.03776
6VAX-F	2648	DERMATOLOGIC EXAMINATION	11	1	1	2647	10	604565	22.83138	2.92363	178.29632	0.04694	True	0.03776
6VAX-F	2648	DERMATOLOGIC EXAMINATION ABNORMAL	17	1	1	2647	16	604559	14.26961	1.89302	107.56480	0.07160	False	0.03776
6VAX-F	2648	DERMATOLOGIC EXAMINATION NORMAL	10	2	2	2646	8	604567	57.07846	12.12635	268.66696	0.00084	True	0.07553
6VAX-F	2648	DEVELOPMENTAL COORDINATION DISORDER	7	1	1	2647	6	604569	38.05230	4.58259	315.97384	0.03013	True	0.03776
6VAX-F	2648	DEVELOPMENTAL DELAY	377	38	38	2610	339	604236	25.59270	18.34186	35.70992	0.00000	True	1.43505
6VAX-F	2648	DIABETES INSIPIDUS	23	1	1	2647	22	604553	10.37790	1.39933	76.96613	0.09563	False	0.03776
6VAX-F	2648	DIABETES MELLITUS	516	1	1	2647	515	604060	0.44333	0.06235	3.15215	0.73261	False	0.03776
6VAX-F	2648	DIABETES WITH HYPEROSMOLARITY	1	1	1	2647	0	604575	-100.00000	-100.00000	-100.00000	0.00436	True	0.03776
6VAX-F	2648	DIABETIC KETOACIDOSIS	42	2	2	2646	40	604535	11.41569	2.76032	47.21118	0.01458	True	0.07553
6VAX-F	2648	DIAGNOSTIC PROCEDURE	152	4	4	2644	148	604427	6.17064	2.28732	16.64690	0.00463	True	0.15106
6VAX-F	2648	DIARRHOEA	16105	195	195	2453	15910	588665	2.79832	2.44259	3.20585	0.00000	True	7.36405
6VAX-F	2648	DIARRHOEA HAEMORRHAGIC	415	20	20	2628	395	604180	11.56019	7.38879	18.08659	0.00000	True	0.75529
6VAX-F	2648	DIET REFUSAL	664	38	38	2610	626	603949	13.85931	10.01143	19.18611	0.00000	True	1.43505
6VAX-F	2648	DIFFERENTIAL WHITE BLOOD CELL COUNT	304	3	3	2645	301	604274	2.27555	0.73025	7.09091	0.14846	False	0.11329
6VAX-F	2648	DIFFERENTIAL WHITE BLOOD CELL COUNT ABNORMAL	49	3	3	2645	46	604529	14.89003	4.63387	47.84621	0.00131	True	0.11329
6VAX-F	2648	DIFFERENTIAL WHITE BLOOD CELL COUNT NORMAL	225	6	6	2642	219	604356	6.25517	2.78223	14.06323	0.00051	True	0.22659
6VAX-F	2648	DILATATION VENTRICULAR	10	1	1	2647	9	604566	25.36820	3.21500	200.16965	0.04276	True	0.03776
6VAX-F	2648	DIPLEGIA	171	2	2	2646	169	604406	2.70194	0.67058	10.88682	0.17163	False	0.07553
6VAX-F	2648	DISABILITY	263	2	2	2646	261	604314	1.74953	0.43546	7.02906	0.31823	False	0.07553
6VAX-F	2648	DISCOMFORT	2102	3	3	2645	2099	602476	0.32632	0.10523	1.01196	0.04350	True	0.11329
6VAX-F	2648	DISORIENTATION	992	3	3	2645	989	603586	0.69256	0.22312	2.14968	0.80656	False	0.11329
6VAX-F	2648	DISSEMINATED INTRAVASCULAR COAGULATION	56	1	1	2647	55	604520	4.15116	0.57466	29.98680	0.21710	False	0.03776
6VAX-F	2648	DISTURBANCE IN ATTENTION	1310	3	3	2645	1307	603268	0.52406	0.16891	1.62597	0.39479	False	0.11329
6VAX-F	2648	DISTURBANCE IN SOCIAL BEHAVIOUR	74	1	1	2647	73	604502	3.12759	0.43485	22.49451	0.27634	False	0.03776
6VAX-F	2648	DIZZINESS	25999	2	2	2646	25997	578578	0.01756	0.00439	0.07020	0.00000	True	0.07553
6VAX-F	2648	DNA ANTIBODY NEGATIVE	73	2	2	2646	71	604504	6.43138	1.57837	26.20588	0.04074	True	0.07553
6VAX-F	2648	DOUBLE STRANDED DNA ANTIBODY	65	1	1	2647	64	604511	3.56740	0.49507	25.70594	0.24730	False	0.03776
6VAX-F	2648	DROOLING	412	7	7	2641	405	604170	3.94616	1.87112	8.32242	0.00246	True	0.26435
6VAX-F	2648	DRUG ADMINISTERED AT INAPPROPRIATE SITE	987	3	3	2645	984	603591	0.69608	0.22425	2.16062	0.80625	False	0.11329
6VAX-F	2648	DRUG ADMINISTERED TO PATIENT OF INAPPROPRIATE AGE	3891	9	9	2639	3882	600693	0.52932	0.27551	1.01696	0.05008	False	0.33988
6VAX-F	2648	DRUG ADMINISTRATION ERROR	461	1	1	2647	460	604115	0.49633	0.06979	3.52984	0.72865	False	0.03776
6VAX-F	2648	DRUG ERUPTION	78	1	1	2647	77	604498	2.96511	0.41255	21.31120	0.28888	False	0.03776
6VAX-F	2648	DRUG INEFFECTIVE	12549	6	6	2642	12543	592032	0.10921	0.04910	0.24293	0.00000	True	0.22659
6VAX-F	2648	DRUG INTERACTION	71	1	1	2647	70	604505	3.26163	0.45323	23.47197	0.26678	False	0.03776
6VAX-F	2648	DRUG WITHDRAWAL SYNDROME	81	1	1	2647	80	604495	2.85392	0.39727	20.50230	0.29814	False	0.03776
6VAX-F	2648	DRUG WITHDRAWAL SYNDROME NEONATAL	1	1	1	2647	0	604575	-100.00000	-100.00000	-100.00000	0.00436	True	0.03776
6VAX-F	2648	DRY MOUTH	639	1	1	2647	638	603937	0.35786	0.05035	2.54351	0.53749	False	0.03776
6VAX-F	2648	DRY SKIN	640	6	6	2642	634	603941	2.16070	0.96792	4.82335	0.06380	False	0.22659
6VAX-F	2648	DUODENITIS	18	1	1	2647	17	604558	13.43022	1.78791	100.88385	0.07565	False	0.03776
6VAX-F	2648	DWARFISM	3	1	1	2647	2	604573	114.15691	10.35405	1258.61897	0.01303	True	0.03776
6VAX-F	2648	DYSARTHRIA	732	1	1	2647	731	603844	0.31233	0.04395	2.21949	0.38902	False	0.03776
6VAX-F	2648	DYSENTERY	15	3	3	2645	12	604563	57.07846	16.11625	202.15310	0.00004	True	0.11329
6VAX-F	2648	DYSKINESIA	2787	57	57	2591	2730	601845	4.76699	3.67739	6.17944	0.00000	True	2.15257
6VAX-F	2648	DYSMORPHISM	21	3	3	2645	18	604557	38.05230	11.21535	129.10682	0.00010	True	0.11329
6VAX-F	2648	DYSPEPSIA	844	2	2	2646	842	603733	0.54231	0.13548	2.17089	0.59676	False	0.07553
6VAX-F	2648	DYSPHAGIA	2427	6	6	2642	2421	602154	0.56583	0.25418	1.25960	0.21297	False	0.22659
6VAX-F	2648	DYSPHONIA	1988	3	3	2645	1985	602590	0.34506	0.11126	1.07013	0.05754	False	0.11329
6VAX-F	2648	DYSPNOEA	17013	92	92	2556	16921	587654	1.24135	1.01500	1.51818	0.03874	True	3.47432
6VAX-F	2648	DYSPRAXIA	15	1	1	2647	14	604561	16.30813	2.14519	123.97716	0.06345	False	0.03776
6VAX-F	2648	DYSSOMNIA	5	1	1	2647	4	604571	57.07846	6.38156	510.52564	0.02161	True	0.03776
6VAX-F	2648	DYSSTASIA	838	6	6	2642	832	603743	1.64649	0.73824	3.67219	0.18851	False	0.22659
6VAX-F	2648	DYSTONIA	144	4	4	2644	140	604435	6.52325	2.41622	17.61131	0.00382	True	0.15106
6VAX-F	2648	EAR CONGESTION	62	1	1	2647	61	604514	3.74285	0.51903	26.99033	0.23737	False	0.03776
6VAX-F	2648	EAR DISORDER	502	1	1	2647	501	604074	0.45572	0.06409	3.24041	0.73097	False	0.03776
6VAX-F	2648	EAR INFECTION	527	7	7	2641	520	604055	3.07346	1.45936	6.47277	0.00913	True	0.26435
6VAX-F	2648	EAR INJURY	5	1	1	2647	4	604571	57.07846	6.38156	510.52564	0.02161	True	0.03776
6VAX-F	2648	EAR SWELLING	89	5	5	2643	84	604491	13.59011	5.51737	33.47448	0.00005	True	0.18882
6VAX-F	2648	EAR TUBE INSERTION	32	1	1	2647	31	604544	7.36496	1.00575	53.93232	0.13052	False	0.03776
6VAX-F	2648	EAR, NOSE AND THROAT EXAMINATION	36	2	2	2646	34	604541	13.43022	3.22815	55.87440	0.01085	True	0.07553
6VAX-F	2648	EAR, NOSE AND THROAT EXAMINATION NORMAL	90	6	6	2642	84	604491	16.30813	7.12987	37.30155	0.00000	True	0.22659
6VAX-F	2648	EARLY INFANTILE EPILEPTIC ENCEPHALOPATHY WITH BURST-SUPPRESSION	5	4	4	2644	1	604574	913.25529	102.10496	8168.41020	0.00000	True	0.15106
6VAX-F	2648	EATING DISORDER	231	6	6	2642	225	604350	6.08837	2.70882	13.68426	0.00059	True	0.22659
6VAX-F	2648	ECCHYMOSIS	1490	10	10	2638	1480	603095	1.54266	0.82927	2.86977	0.16431	False	0.37764
6VAX-F	2648	ECHOCARDIOGRAM	409	5	5	2643	404	604171	2.82567	1.17073	6.82003	0.03484	True	0.18882
6VAX-F	2648	ECHOCARDIOGRAM ABNORMAL	326	23	23	2625	303	604272	17.33075	11.36216	26.43466	0.00000	True	0.86858
6VAX-F	2648	ECHOCARDIOGRAM NORMAL	586	41	41	2607	545	604030	17.17590	12.53350	23.53784	0.00000	True	1.54834
6VAX-F	2648	ECHOENCEPHALOGRAM	3	2	2	2646	1	604574	456.62764	41.41619	5034.47587	0.00006	True	0.07553
6VAX-F	2648	ECHOENCEPHALOGRAM NORMAL	5	5	5	2643	0	604575	-100.00000	-100.00000	-100.00000	0.00000	True	0.18882
6VAX-F	2648	ECHOGRAPHY ABNORMAL	54	4	4	2644	50	604525	18.26511	6.60127	50.53786	0.00010	True	0.15106
6VAX-F	2648	ECHOGRAPHY NORMAL	38	7	7	2641	31	604544	51.55473	22.72206	116.97403	0.00000	True	0.26435
6VAX-F	2648	ECOUVILLONAGE	1	1	1	2647	0	604575	-100.00000	-100.00000	-100.00000	0.00436	True	0.03776
6VAX-F	2648	ECZEMA	845	11	11	2637	834	603741	3.01133	1.66323	5.45212	0.00147	True	0.41541
6VAX-F	2648	EJECTION FRACTION DECREASED	64	1	1	2647	63	604512	3.62403	0.50281	26.12028	0.24400	False	0.03776
6VAX-F	2648	ELECTROCARDIOGRAM	1379	24	24	2624	1355	603220	4.04393	2.70585	6.04372	0.00000	True	0.90634
6VAX-F	2648	ELECTROCARDIOGRAM ABNORMAL	791	17	17	2631	774	603801	5.01464	3.10595	8.09629	0.00000	True	0.64199
6VAX-F	2648	ELECTROCARDIOGRAM AMBULATORY	77	1	1	2647	76	604499	3.00413	0.41791	21.59520	0.28576	False	0.03776
6VAX-F	2648	ELECTROCARDIOGRAM AMBULATORY NORMAL	58	3	3	2645	55	604520	12.45348	3.89841	39.78269	0.00214	True	0.11329
6VAX-F	2648	ELECTROCARDIOGRAM NORMAL	1757	95	95	2553	1662	602913	13.05043	10.65060	15.99100	0.00000	True	3.58761
6VAX-F	2648	ELECTROCARDIOGRAM Q WAVE ABNORMAL	2	1	1	2647	1	604574	228.31382	14.28379	3649.39553	0.00870	True	0.03776
6VAX-F	2648	ELECTROCARDIOGRAM QT INTERVAL NORMAL	8	2	2	2646	6	604569	76.10461	15.36713	376.90260	0.00052	True	0.07553
6VAX-F	2648	ELECTROCARDIOGRAM REPOLARISATION ABNORMALITY	9	1	1	2647	8	604567	28.53923	3.57061	228.10887	0.03857	True	0.03776
6VAX-F	2648	ELECTROENCEPHALOGRAM	1011	39	39	2609	972	603603	9.16074	6.66670	12.58780	0.00000	True	1.47281
6VAX-F	2648	ELECTROENCEPHALOGRAM ABNORMAL	1373	70	70	2578	1303	603272	12.26552	9.67326	15.55245	0.00000	True	2.64350
6VAX-F	2648	ELECTROENCEPHALOGRAM NORMAL	1578	169	169	2479	1409	603166	27.38470	23.45451	31.97345	0.00000	True	6.38218
6VAX-F	2648	ELECTROMYOGRAM NORMAL	279	1	1	2647	278	604297	0.82127	0.11532	5.84888	1.00000	False	0.03776
6VAX-F	2648	ELECTRON MICROSCOPY	1	1	1	2647	0	604575	-100.00000	-100.00000	-100.00000	0.00436	True	0.03776
6VAX-F	2648	ELECTRONEUROMYOGRAPHY	29	1	1	2647	28	604547	8.15407	1.10981	59.91005	0.11904	False	0.03776
6VAX-F	2648	ELECTRONYSTAGMOGRAM NORMAL	5	1	1	2647	4	604571	57.07846	6.38156	510.52564	0.02161	True	0.03776
6VAX-F	2648	ELECTROPHORESIS PROTEIN NORMAL	67	3	3	2645	64	604511	10.70221	3.36442	34.04372	0.00322	True	0.11329
6VAX-F	2648	EMOTIONAL DISORDER	183	4	4	2644	179	604396	5.10198	1.89549	13.73275	0.00881	True	0.15106
6VAX-F	2648	EMOTIONAL DISTRESS	589	28	28	2620	561	604014	11.39534	7.81147	16.62349	0.00000	True	1.05740
6VAX-F	2648	EMPYEMA	45	1	1	2647	44	604531	5.18895	0.71516	37.64919	0.17854	False	0.03776
6VAX-F	2648	ENANTHEMA	5	1	1	2647	4	604571	57.07846	6.38156	510.52564	0.02161	True	0.03776
6VAX-F	2648	ENCEPHALITIS	1316	8	8	2640	1308	603267	1.39641	0.69759	2.79530	0.29442	False	0.30211
6VAX-F	2648	ENCEPHALITIS BRAIN STEM	17	1	1	2647	16	604559	14.26961	1.89302	107.56480	0.07160	False	0.03776
6VAX-F	2648	ENCEPHALITIS HERPES	13	1	1	2647	12	604563	19.02615	2.47475	146.27523	0.05523	False	0.03776
6VAX-F	2648	ENCEPHALITIS MENINGOCOCCAL	2	1	1	2647	1	604574	228.31382	14.28379	3649.39553	0.00870	True	0.03776
6VAX-F	2648	ENCEPHALITIS POST IMMUNISATION	35	1	1	2647	34	604541	6.71511	0.91953	49.03865	0.14184	False	0.03776
6VAX-F	2648	ENCEPHALOCELE REPAIR	1	1	1	2647	0	604575	-100.00000	-100.00000	-100.00000	0.00436	True	0.03776
6VAX-F	2648	ENCEPHALOMYELITIS	50	1	1	2647	49	604526	4.65947	0.64363	33.73149	0.19630	False	0.03776
6VAX-F	2648	ENCEPHALOPATHY	675	18	18	2630	657	603918	6.25517	3.92241	9.97530	0.00000	True	0.67976
6VAX-F	2648	ENDOSCOPY NORMAL	43	2	2	2646	41	604534	11.13726	2.69522	46.02169	0.01525	True	0.07553
6VAX-F	2648	ENDOTRACHEAL INTUBATION	550	24	24	2624	526	604049	10.41736	6.93201	15.65512	0.00000	True	0.90634
6VAX-F	2648	ENEMA ADMINISTRATION	570	23	23	2625	547	604028	9.60003	6.33649	14.54444	0.00000	True	0.86858
6VAX-F	2648	ENTERAL NUTRITION	4	1	1	2647	3	604572	76.10461	7.91863	731.42883	0.01733	True	0.03776
6VAX-F	2648	ENTERITIS	105	2	2	2646	103	604472	4.43328	1.09455	17.95626	0.07736	False	0.07553
6VAX-F	2648	ENTERITIS INFECTIOUS	12	2	2	2646	10	604565	45.66276	10.00969	208.30695	0.00122	True	0.07553
6VAX-F	2648	ENTEROBACTER TEST POSITIVE	8	1	1	2647	7	604568	32.61626	4.01417	265.01630	0.03436	True	0.03776
6VAX-F	2648	ENTEROCOCCUS TEST POSITIVE	13	2	2	2646	11	604564	41.51160	9.20542	187.19547	0.00144	True	0.07553
6VAX-F	2648	ENTEROCOLITIS	63	2	2	2646	61	604514	7.48570	1.83134	30.59826	0.03115	True	0.07553
6VAX-F	2648	ENTEROCOLITIS HAEMORRHAGIC	15	1	1	2647	14	604561	16.30813	2.14519	123.97716	0.06345	False	0.03776
6VAX-F	2648	ENTEROVIRUS INFECTION	26	1	1	2647	25	604550	9.13255	1.23787	67.37651	0.10741	False	0.03776
6VAX-F	2648	ENTEROVIRUS TEST	13	1	1	2647	12	604563	19.02615	2.47475	146.27523	0.05523	False	0.03776
6VAX-F	2648	ENTEROVIRUS TEST NEGATIVE	149	9	9	2639	140	604435	14.67732	7.48858	28.76697	0.00000	True	0.33988
6VAX-F	2648	ENTEROVIRUS TEST POSITIVE	28	1	1	2647	27	604548	8.45607	1.14945	62.20812	0.11518	False	0.03776
6VAX-F	2648	EOSINOPHIL CATIONIC PROTEIN	2	1	1	2647	1	604574	228.31382	14.28379	3649.39553	0.00870	True	0.03776
6VAX-F	2648	EOSINOPHIL COUNT	43	3	3	2645	40	604535	17.12354	5.30050	55.31850	0.00090	True	0.11329
6VAX-F	2648	EOSINOPHIL COUNT DECREASED	74	3	3	2645	71	604504	9.64706	3.04049	30.60885	0.00426	True	0.11329
6VAX-F	2648	EOSINOPHIL COUNT INCREASED	153	6	6	2642	147	604428	9.31893	4.12311	21.06238	0.00006	True	0.22659
6VAX-F	2648	EOSINOPHIL COUNT NORMAL	164	4	4	2644	160	604415	5.70785	2.11785	15.38328	0.00604	True	0.15106
6VAX-F	2648	EOSINOPHIL PERCENTAGE	187	11	11	2637	176	604399	14.26961	7.76930	26.20853	0.00000	True	0.41541
6VAX-F	2648	EOSINOPHIL PERCENTAGE DECREASED	114	4	4	2644	110	604465	8.30232	3.06365	22.49884	0.00165	True	0.15106
6VAX-F	2648	EOSINOPHIL PERCENTAGE INCREASED	150	13	13	2635	137	604438	21.66482	12.28229	38.21471	0.00000	True	0.49094
6VAX-F	2648	EOSINOPHILIA	207	5	5	2643	202	604373	5.65133	2.32889	13.71363	0.00229	True	0.18882
6VAX-F	2648	EPIDIDYMITIS	34	1	1	2647	33	604542	6.91860	0.94658	50.56819	0.13808	False	0.03776
6VAX-F	2648	EPIGLOTTITIS	46	1	1	2647	45	604530	5.07364	0.69961	36.79452	0.18212	False	0.03776
6VAX-F	2648	EPILEPSY	868	55	55	2593	813	603762	15.44558	11.78614	20.24123	0.00000	True	2.07704
6VAX-F	2648	EPISTAXIS	970	4	4	2644	966	603609	0.94540	0.35436	2.52221	1.00000	False	0.15106
6VAX-F	2648	EPSTEIN-BARR VIRUS ANTIBODY	26	2	2	2646	24	604551	19.02615	4.49875	80.46564	0.00576	True	0.07553
6VAX-F	2648	EPSTEIN-BARR VIRUS ANTIBODY NEGATIVE	185	7	7	2641	178	604397	8.97863	4.22313	19.08913	0.00002	True	0.26435
6VAX-F	2648	EPSTEIN-BARR VIRUS ANTIBODY POSITIVE	126	1	1	2647	125	604450	1.82651	0.25537	13.06401	0.42347	False	0.03776
6VAX-F	2648	EPSTEIN-BARR VIRUS INFECTION	64	1	1	2647	63	604512	3.62403	0.50281	26.12028	0.24400	False	0.03776
6VAX-F	2648	EPSTEIN-BARR VIRUS TEST NEGATIVE	268	12	12	2636	256	604319	10.70221	6.00623	19.06974	0.00000	True	0.45317
6VAX-F	2648	ERUCTATION	124	4	4	2644	120	604455	7.61046	2.81245	20.59383	0.00224	True	0.15106
6VAX-F	2648	ERYSIPELAS	146	1	1	2647	145	604430	1.57458	0.22038	11.24995	0.47173	False	0.03776
6VAX-F	2648	ERYTHEMA	39648	102	102	2546	39546	565029	0.58888	0.48672	0.71249	0.00000	True	3.85196
6VAX-F	2648	ERYTHEMA MULTIFORME	1487	5	5	2643	1482	603093	0.77029	0.32040	1.85187	0.69528	False	0.18882
6VAX-F	2648	ERYTHEMA OF EYELID	87	1	1	2647	86	604489	2.65481	0.36986	19.05571	0.31631	False	0.03776
6VAX-F	2648	ERYTHROBLAST COUNT INCREASED	1	1	1	2647	0	604575	-100.00000	-100.00000	-100.00000	0.00436	True	0.03776
6VAX-F	2648	ERYTHROCYTE OSMOTIC FRAGILITY TEST	3	1	1	2647	2	604573	114.15691	10.35405	1258.61897	0.01303	True	0.03776
6VAX-F	2648	ERYTHROPENIA	1	1	1	2647	0	604575	-100.00000	-100.00000	-100.00000	0.00436	True	0.03776
6VAX-F	2648	ESCHERICHIA INFECTION	58	6	6	2642	52	604523	26.34390	11.32519	61.27944	0.00000	True	0.22659
6VAX-F	2648	ESCHERICHIA SEPSIS	2	2	2	2646	0	604575	-100.00000	-100.00000	-100.00000	0.00002	True	0.07553
6VAX-F	2648	ESCHERICHIA TEST NEGATIVE	24	4	4	2644	20	604555	45.66276	15.61803	133.50521	0.00000	True	0.15106
6VAX-F	2648	ESCHERICHIA TEST POSITIVE	83	11	11	2637	72	604503	34.88128	18.51531	65.71336	0.00000	True	0.41541
6VAX-F	2648	ESCHERICHIA URINARY TRACT INFECTION	15	1	1	2647	14	604561	16.30813	2.14519	123.97716	0.06345	False	0.03776
6VAX-F	2648	EXAGGERATED STARTLE RESPONSE	32	2	2	2646	30	604545	15.22092	3.63933	63.65917	0.00864	True	0.07553
6VAX-F	2648	EXANTHEMA SUBITUM	34	5	5	2643	29	604546	39.36445	15.24928	101.61532	0.00000	True	0.18882
6VAX-F	2648	EXCESSIVE CERUMEN PRODUCTION	4	1	1	2647	3	604572	76.10461	7.91863	731.42883	0.01733	True	0.03776
6VAX-F	2648	EXCESSIVE EYE BLINKING	129	2	2	2646	127	604448	3.59549	0.88994	14.52627	0.10941	False	0.07553
6VAX-F	2648	EXERESIS	6	1	1	2647	5	604570	45.66276	5.33639	390.72979	0.02588	True	0.03776
6VAX-F	2648	EXOPHTHALMOS	32	3	3	2645	29	604546	23.61867	7.19908	77.48793	0.00037	True	0.11329
6VAX-F	2648	EXOSTOSIS	22	1	1	2647	21	604554	10.87209	1.46293	80.79858	0.09167	False	0.03776
6VAX-F	2648	EXPIRED DRUG ADMINISTERED	4149	1	1	2647	4148	600427	0.05504	0.00775	0.39071	0.00000	True	0.03776
6VAX-F	2648	EXPIRED PRODUCT ADMINISTERED	3021	3	3	2645	3018	601557	0.22695	0.07320	0.70364	0.00198	True	0.11329
6VAX-F	2648	EXPLORATIVE LAPAROTOMY	36	1	1	2647	35	604540	6.52325	0.89399	47.59888	0.14558	False	0.03776
6VAX-F	2648	EXPOSURE DURING PREGNANCY	2023	1	1	2647	2022	602553	0.11291	0.01590	0.80171	0.00328	True	0.03776
6VAX-F	2648	EXPRESSIVE LANGUAGE DISORDER	29	1	1	2647	28	604547	8.15407	1.10981	59.91005	0.11904	False	0.03776
6VAX-F	2648	EXTENSIVE SWELLING OF VACCINATED LIMB	357	3	3	2645	354	604221	1.93486	0.62144	6.02421	0.20526	False	0.11329
6VAX-F	2648	EXTENSOR PLANTAR RESPONSE	137	4	4	2644	133	604442	6.86658	2.54154	18.55170	0.00320	True	0.15106
6VAX-F	2648	EXTRA DOSE ADMINISTERED	1538	2	2	2646	1536	603039	0.29728	0.07432	1.18915	0.07711	False	0.07553
6VAX-F	2648	EXTRAPYRAMIDAL DISORDER	46	2	2	2646	44	604531	10.37790	2.51712	42.78733	0.01733	True	0.07553
6VAX-F	2648	EXTREMITY NECROSIS	3	1	1	2647	2	604573	114.15691	10.35405	1258.61897	0.01303	True	0.03776
6VAX-F	2648	EXTUBATION	46	3	3	2645	43	604532	15.92887	4.94482	51.31209	0.00109	True	0.11329
6VAX-F	2648	EYE DISCHARGE	600	2	2	2646	598	603977	0.76359	0.19063	3.05872	1.00000	False	0.07553
6VAX-F	2648	EYE DISORDER	1079	7	7	2641	1072	603503	1.49086	0.70971	3.13176	0.24671	False	0.26435
6VAX-F	2648	EYE HAEMORRHAGE	84	1	1	2647	83	604492	2.75077	0.38308	19.75255	0.30728	False	0.03776
6VAX-F	2648	EYE INFLAMMATION	117	2	2	2646	115	604460	3.97068	0.98170	16.06019	0.09297	False	0.07553
6VAX-F	2648	EYE MOVEMENT DISORDER	1360	53	53	2595	1307	603268	9.25833	7.05374	12.15194	0.00000	True	2.00151
6VAX-F	2648	EYE ROLLING	192	5	5	2643	187	604388	6.10465	2.51354	14.82640	0.00165	True	0.18882
6VAX-F	2648	EYE SWELLING	2260	9	9	2639	2251	602324	0.91285	0.47487	1.75477	1.00000	False	0.33988
6VAX-F	2648	EYELID DISORDER	74	1	1	2647	73	604502	3.12759	0.43485	22.49451	0.27634	False	0.03776
6VAX-F	2648	EYELID IRRITATION	10	1	1	2647	9	604566	25.36820	3.21500	200.16965	0.04276	True	0.03776
6VAX-F	2648	EYELID OEDEMA	1197	17	17	2631	1180	603395	3.28927	2.04093	5.30114	0.00003	True	0.64199
6VAX-F	2648	EYELID PTOSIS	273	3	3	2645	270	604305	2.53682	0.81357	7.91015	0.11804	False	0.11329
6VAX-F	2648	FACE OEDEMA	3630	3	3	2645	3627	600948	0.18885	0.06092	0.58544	0.00020	True	0.11329
6VAX-F	2648	FACIAL ASYMMETRY	21	1	1	2647	20	604555	11.41569	1.53257	85.03206	0.08769	False	0.03776
6VAX-F	2648	FACIAL PALSY	1541	2	2	2646	1539	603036	0.29670	0.07418	1.18683	0.07725	False	0.07553
6VAX-F	2648	FACIAL PARESIS	351	1	1	2647	350	604225	0.65233	0.09166	4.64232	1.00000	False	0.03776
6VAX-F	2648	FAECAL CALPROTECTIN ABNORMAL	2	1	1	2647	1	604574	228.31382	14.28379	3649.39553	0.00870	True	0.03776
6VAX-F	2648	FAECAL ELASTASE CONCENTRATION ABNORMAL	1	1	1	2647	0	604575	-100.00000	-100.00000	-100.00000	0.00436	True	0.03776
6VAX-F	2648	FAECAL INCONTINENCE	253	1	1	2647	252	604323	0.90601	0.12717	6.45468	1.00000	False	0.03776
6VAX-F	2648	FAECAL VOLUME DECREASED	8	1	1	2647	7	604568	32.61626	4.01417	265.01630	0.03436	True	0.03776
6VAX-F	2648	FAECAL VOLUME INCREASED	13	1	1	2647	12	604563	19.02615	2.47475	146.27523	0.05523	False	0.03776
6VAX-F	2648	FAECALITH	1	1	1	2647	0	604575	-100.00000	-100.00000	-100.00000	0.00436	True	0.03776
6VAX-F	2648	FAECES DISCOLOURED	591	35	35	2613	556	604019	14.37227	10.23560	20.18077	0.00000	True	1.32175
6VAX-F	2648	FAECES HARD	26	2	2	2646	24	604551	19.02615	4.49875	80.46564	0.00576	True	0.07553
6VAX-F	2648	FAECES PALE	116	3	3	2645	113	604462	6.06143	1.92717	19.06472	0.01457	True	0.11329
6VAX-F	2648	FAILURE TO THRIVE	60	5	5	2643	55	604520	20.75580	8.31538	51.80799	0.00001	True	0.18882
6VAX-F	2648	FALL	3777	12	12	2636	3765	600810	0.72769	0.41342	1.28087	0.32093	False	0.45317
6VAX-F	2648	FASCIITIS	289	1	1	2647	288	604287	0.79276	0.11133	5.64511	1.00000	False	0.03776
6VAX-F	2648	FATIGUE	18023	54	54	2594	17969	586606	0.68612	0.52672	0.89376	0.00402	True	2.03927
6VAX-F	2648	FEAR	190	1	1	2647	189	604386	1.20801	0.16934	8.61738	0.56417	False	0.03776
6VAX-F	2648	FEBRILE CONVULSION	4436	103	103	2545	4333	600242	5.42726	4.48076	6.57370	0.00000	True	3.88973
6VAX-F	2648	FEBRILE INFECTION	49	5	5	2643	44	604531	25.94475	10.29600	65.37786	0.00000	True	0.18882
6VAX-F	2648	FEBRILE NEUTROPENIA	9	2	2	2646	7	604568	65.23252	13.55731	313.87366	0.00067	True	0.07553
6VAX-F	2648	FEEDING DISORDER	151	5	5	2643	146	604429	7.81897	3.20897	19.05170	0.00057	True	0.18882
6VAX-F	2648	FEEDING DISORDER NEONATAL	96	4	4	2644	92	604483	9.92669	3.65055	26.99297	0.00087	True	0.15106
6VAX-F	2648	FEEDING DISORDER OF INFANCY OR EARLY CHILDHOOD	145	14	14	2634	131	604444	24.39995	14.08052	42.28237	0.00000	True	0.52870
6VAX-F	2648	FEEDING TUBE USER	4	1	1	2647	3	604572	76.10461	7.91863	731.42883	0.01733	True	0.03776
6VAX-F	2648	FEELING ABNORMAL	3611	2	2	2646	3609	600966	0.12652	0.03165	0.50584	0.00004	True	0.07553
6VAX-F	2648	FEELING COLD	1740	6	6	2642	1734	602841	0.79001	0.35475	1.75933	0.71540	False	0.22659
6VAX-F	2648	FEELING DRUNK	80	1	1	2647	79	604496	2.89005	0.40223	20.76502	0.29507	False	0.03776
6VAX-F	2648	FEELING HOT	9466	9	9	2639	9457	595118	0.21728	0.11314	0.41726	0.00000	True	0.33988
6VAX-F	2648	FEELING OF BODY TEMPERATURE CHANGE	352	1	1	2647	351	604224	0.65047	0.09140	4.62906	1.00000	False	0.03776
6VAX-F	2648	FIBRIN D DIMER	58	2	2	2646	56	604519	8.15407	1.99087	33.39683	0.02674	True	0.07553
6VAX-F	2648	FIBRIN D DIMER INCREASED	80	5	5	2643	75	604500	15.22092	6.16070	37.60552	0.00003	True	0.18882
6VAX-F	2648	FIBRIN D DIMER NORMAL	55	1	1	2647	54	604521	4.22803	0.58511	30.55211	0.21367	False	0.03776
6VAX-F	2648	FIBRIN INCREASED	11	1	1	2647	10	604565	22.83138	2.92363	178.29632	0.04694	True	0.03776
6VAX-F	2648	FIBRINOLYSIS INCREASED	2	1	1	2647	1	604574	228.31382	14.28379	3649.39553	0.00870	True	0.03776
6VAX-F	2648	FINE MOTOR DELAY	30	1	1	2647	29	604546	7.87289	1.07281	57.77560	0.12288	False	0.03776
6VAX-F	2648	FISTULA	7	1	1	2647	6	604569	38.05230	4.58259	315.97384	0.03013	True	0.03776
6VAX-F	2648	FLAT AFFECT	37	1	1	2647	36	604539	6.34205	0.86982	46.24120	0.14931	False	0.03776
6VAX-F	2648	FLATULENCE	543	19	19	2629	524	604051	8.27855	5.24633	13.06332	0.00000	True	0.71752
6VAX-F	2648	FLOPPY INFANT	35	11	11	2637	24	604551	104.64383	51.31225	213.40582	0.00000	True	0.41541
6VAX-F	2648	FLOW CYTOMETRY	44	1	1	2647	43	604532	5.30962	0.73142	38.54449	0.17494	False	0.03776
6VAX-F	2648	FLUID INTAKE REDUCED	230	33	33	2615	197	604378	38.24546	26.50526	55.18586	0.00000	True	1.24622
6VAX-F	2648	FLUID REPLACEMENT	91	1	1	2647	90	604485	2.53682	0.35360	18.19962	0.32816	False	0.03776
6VAX-F	2648	FLUSHING	2863	13	13	2635	2850	601725	1.04143	0.60477	1.79338	0.88623	False	0.49094
6VAX-F	2648	FOAMING AT MOUTH	234	14	14	2634	220	604355	14.52906	8.47617	24.90436	0.00000	True	0.52870
6VAX-F	2648	FOETAL HAEMOGLOBIN INCREASED	2	1	1	2647	1	604574	228.31382	14.28379	3649.39553	0.00870	True	0.03776
6VAX-F	2648	FONTANELLE BULGING	211	18	18	2630	193	604382	21.29352	13.15595	34.46455	0.00000	True	0.67976
6VAX-F	2648	FONTANELLE DEPRESSED	39	2	2	2646	37	604538	12.34129	2.97597	51.17915	0.01266	True	0.07553
6VAX-F	2648	FOOD ALLERGY	309	4	4	2644	305	604270	2.99428	1.11744	8.02346	0.04756	True	0.15106
6VAX-F	2648	FOOD AVERSION	36	4	4	2644	32	604543	28.53923	10.09998	80.64247	0.00002	True	0.15106
6VAX-F	2648	FOOD INTOLERANCE	94	1	1	2647	93	604482	2.45499	0.34232	17.60638	0.33691	False	0.03776
6VAX-F	2648	FOREIGN BODY ASPIRATION	8	1	1	2647	7	604568	32.61626	4.01417	265.01630	0.03436	True	0.03776
6VAX-F	2648	FOREIGN BODY REACTION	2	1	1	2647	1	604574	228.31382	14.28379	3649.39553	0.00870	True	0.03776
6VAX-F	2648	FRACTURE	46	1	1	2647	45	604530	5.07364	0.69961	36.79452	0.18212	False	0.03776
6VAX-F	2648	FREE FATTY ACIDS	6	2	2	2646	4	604571	114.15691	20.91765	623.00493	0.00028	True	0.07553
6VAX-F	2648	FREE THYROXINE INDEX NORMAL	10	1	1	2647	9	604566	25.36820	3.21500	200.16965	0.04276	True	0.03776
6VAX-F	2648	FREQUENT BOWEL MOVEMENTS	209	11	11	2637	198	604377	12.68410	6.91985	23.24998	0.00000	True	0.41541
6VAX-F	2648	FRUSTRATION TOLERANCE DECREASED	14	1	1	2647	13	604562	17.56260	2.29824	134.20945	0.05935	False	0.03776
6VAX-F	2648	FULL BLOOD COUNT	2888	4	4	2644	2884	601691	0.31666	0.11885	0.84368	0.01000	True	0.15106
6VAX-F	2648	FULL BLOOD COUNT ABNORMAL	260	2	2	2646	258	604317	1.76987	0.44049	7.11123	0.31345	False	0.07553
6VAX-F	2648	FULL BLOOD COUNT NORMAL	2505	18	18	2630	2487	602088	1.65245	1.04101	2.62303	0.04542	True	0.67976
6VAX-F	2648	FUNDOSCOPY ABNORMAL	46	2	2	2646	44	604531	10.37790	2.51712	42.78733	0.01733	True	0.07553
6VAX-F	2648	FUNDOSCOPY NORMAL	61	6	6	2642	55	604520	24.90696	10.73307	57.79862	0.00000	True	0.22659
6VAX-F	2648	FUNGAL INFECTION	198	4	4	2644	194	604381	4.70750	1.75040	12.66032	0.01150	True	0.15106
6VAX-F	2648	FUNGAL SKIN INFECTION	13	1	1	2647	12	604563	19.02615	2.47475	146.27523	0.05523	False	0.03776
6VAX-F	2648	FUNGAL TEST	49	1	1	2647	48	604527	4.75654	0.65677	34.44844	0.19278	False	0.03776
6VAX-F	2648	FUNGAL TEST NEGATIVE	42	2	2	2646	40	604535	11.41569	2.76032	47.21118	0.01458	True	0.07553
6VAX-F	2648	FUNGAL TEST POSITIVE	10	1	1	2647	9	604566	25.36820	3.21500	200.16965	0.04276	True	0.03776
6VAX-F	2648	FURUNCLE	126	2	2	2646	124	604451	3.68248	0.91124	14.88161	0.10523	False	0.07553
6VAX-F	2648	GAIT DISTURBANCE	4826	23	23	2625	4803	599772	1.09332	0.72712	1.64395	0.65972	False	0.86858
6VAX-F	2648	GAMMA-GLUTAMYLTRANSFERASE	38	3	3	2645	35	604540	19.56976	6.02246	63.59115	0.00062	True	0.11329
6VAX-F	2648	GAMMA-GLUTAMYLTRANSFERASE DECREASED	9	4	4	2644	5	604570	182.65106	49.07373	679.82219	0.00000	True	0.15106
6VAX-F	2648	GAMMA-GLUTAMYLTRANSFERASE INCREASED	450	9	9	2639	441	604134	4.65947	2.41099	9.00484	0.00020	True	0.33988
6VAX-F	2648	GAMMA-GLUTAMYLTRANSFERASE NORMAL	103	11	11	2637	92	604483	27.29839	14.62452	50.95566	0.00000	True	0.41541
6VAX-F	2648	GASTRIC DILATATION	19	1	1	2647	18	604557	12.68410	1.69385	94.98282	0.07968	False	0.03776
6VAX-F	2648	GASTRITIS	210	1	1	2647	209	604366	1.09241	0.15321	7.78890	0.60066	False	0.03776
6VAX-F	2648	GASTROENTERITIS	947	35	35	2613	912	603663	8.76204	6.26511	12.25412	0.00000	True	1.32175
6VAX-F	2648	GASTROENTERITIS ADENOVIRUS	9	1	1	2647	8	604567	28.53923	3.57061	228.10887	0.03857	True	0.03776
6VAX-F	2648	GASTROENTERITIS NOROVIRUS	31	8	8	2640	23	604552	79.41350	35.55465	177.37497	0.00000	True	0.30211
6VAX-F	2648	GASTROENTERITIS ROTAVIRUS	677	18	18	2630	659	603916	6.23619	3.91058	9.94484	0.00000	True	0.67976
6VAX-F	2648	GASTROENTERITIS STAPHYLOCOCCAL	1	1	1	2647	0	604575	-100.00000	-100.00000	-100.00000	0.00436	True	0.03776
6VAX-F	2648	GASTROENTERITIS VIRAL	111	2	2	2646	109	604466	4.18924	1.03506	16.95539	0.08506	False	0.07553
6VAX-F	2648	GASTROINTESTINAL DISORDER	1115	13	13	2635	1102	603473	2.69336	1.56099	4.64717	0.00153	True	0.49094
6VAX-F	2648	GASTROINTESTINAL EXAMINATION NORMAL	13	1	1	2647	12	604563	19.02615	2.47475	146.27523	0.05523	False	0.03776
6VAX-F	2648	GASTROINTESTINAL HAEMORRHAGE	246	1	1	2647	245	604330	0.93189	0.13079	6.63984	1.00000	False	0.03776
6VAX-F	2648	GASTROINTESTINAL HYPERMOTILITY	25	2	2	2646	23	604552	19.85338	4.68304	84.16683	0.00534	True	0.07553
6VAX-F	2648	GASTROINTESTINAL HYPOMOTILITY	44	5	5	2643	39	604536	29.27100	11.54609	74.20619	0.00000	True	0.18882
6VAX-F	2648	GASTROINTESTINAL INFECTION	39	1	1	2647	38	604537	6.00826	0.82521	43.74555	0.15671	False	0.03776
6VAX-F	2648	GASTROINTESTINAL INFLAMMATION	34	4	4	2644	30	604545	30.44184	10.73197	86.35003	0.00002	True	0.15106
6VAX-F	2648	GASTROINTESTINAL MOTILITY DISORDER	29	1	1	2647	28	604547	8.15407	1.10981	59.91005	0.11904	False	0.03776
6VAX-F	2648	GASTROINTESTINAL NECROSIS	53	3	3	2645	50	604525	13.69883	4.27539	43.89257	0.00165	True	0.11329
6VAX-F	2648	GASTROINTESTINAL OBSTRUCTION	8	1	1	2647	7	604568	32.61626	4.01417	265.01630	0.03436	True	0.03776
6VAX-F	2648	GASTROINTESTINAL PAIN	91	1	1	2647	90	604485	2.53682	0.35360	18.19962	0.32816	False	0.03776
6VAX-F	2648	GASTROINTESTINAL PERFORATION	4	1	1	2647	3	604572	76.10461	7.91863	731.42883	0.01733	True	0.03776
6VAX-F	2648	GASTROINTESTINAL SOUNDS ABNORMAL	98	3	3	2645	95	604480	7.20991	2.28589	22.74073	0.00926	True	0.11329
6VAX-F	2648	GASTROINTESTINAL TUBE INSERTION	137	14	14	2634	123	604452	25.98694	14.97037	45.11050	0.00000	True	0.52870
6VAX-F	2648	GASTROOESOPHAGEAL REFLUX DISEASE	548	13	13	2635	535	604040	5.54781	3.20451	9.60467	0.00000	True	0.49094
6VAX-F	2648	GASTROSTOMY TUBE INSERTION	17	1	1	2647	16	604559	14.26961	1.89302	107.56480	0.07160	False	0.03776
6VAX-F	2648	GAZE PALSY	2735	91	91	2557	2644	601931	7.85800	6.39860	9.65027	0.00000	True	3.43656
6VAX-F	2648	GENE MUTATION	12	1	1	2647	11	604564	20.75580	2.68057	160.71348	0.05109	False	0.03776
6VAX-F	2648	GENE MUTATION IDENTIFICATION TEST	31	1	1	2647	30	604545	7.61046	1.03820	55.78789	0.12671	False	0.03776
6VAX-F	2648	GENE MUTATION IDENTIFICATION TEST NEGATIVE	18	2	2	2646	16	604559	28.53923	6.56515	124.06230	0.00278	True	0.07553
6VAX-F	2648	GENE MUTATION IDENTIFICATION TEST POSITIVE	34	1	1	2647	33	604542	6.91860	0.94658	50.56819	0.13808	False	0.03776
6VAX-F	2648	GENE SEQUENCING	4	1	1	2647	3	604572	76.10461	7.91863	731.42883	0.01733	True	0.03776
6VAX-F	2648	GENERAL ANAESTHESIA	4	1	1	2647	3	604572	76.10461	7.91863	731.42883	0.01733	True	0.03776
6VAX-F	2648	GENERAL PHYSICAL CONDITION ABNORMAL	39	3	3	2645	36	604539	19.02615	5.86276	61.74476	0.00067	True	0.11329
6VAX-F	2648	GENERAL PHYSICAL HEALTH DETERIORATION	603	47	47	2601	556	604019	19.29991	14.36541	25.92939	0.00000	True	1.77492
6VAX-F	2648	GENERAL SYMPTOM	20	1	1	2647	19	604556	12.01652	1.60918	89.73289	0.08370	False	0.03776
6VAX-F	2648	GENERALISED ERYTHEMA	272	3	3	2645	269	604306	2.54625	0.81657	7.93974	0.11710	False	0.11329
6VAX-F	2648	GENERALISED TONIC-CLONIC SEIZURE	216	16	16	2632	200	604375	18.26511	10.99238	30.34958	0.00000	True	0.60423
6VAX-F	2648	GIANOTTI-CROSTI SYNDROME	69	4	4	2644	65	604510	14.05008	5.12252	38.53666	0.00025	True	0.15106
6VAX-F	2648	GIARDIASIS	6	1	1	2647	5	604570	45.66276	5.33639	390.72979	0.02588	True	0.03776
6VAX-F	2648	GINGIVAL ERYTHEMA	10	1	1	2647	9	604566	25.36820	3.21500	200.16965	0.04276	True	0.03776
6VAX-F	2648	GLOMERULONEPHRITIS	95	1	1	2647	94	604481	2.42887	0.33871	17.41713	0.33980	False	0.03776
6VAX-F	2648	GLUCOSE-6-PHOSPHATE DEHYDROGENASE NORMAL	6	2	2	2646	4	604571	114.15691	20.91765	623.00493	0.00028	True	0.07553
6VAX-F	2648	GLUCOSE URINE ABSENT	74	3	3	2645	71	604504	9.64706	3.04049	30.60885	0.00426	True	0.11329
6VAX-F	2648	GLUCOSE URINE PRESENT	59	1	1	2647	58	604517	3.93645	0.54543	28.40979	0.22730	False	0.03776
6VAX-F	2648	GLUTAMATE DEHYDROGENASE	4	3	3	2645	1	604574	684.94147	71.26763	6582.85949	0.00000	True	0.11329
6VAX-F	2648	GLUTEN SENSITIVITY	18	1	1	2647	17	604558	13.43022	1.78791	100.88385	0.07565	False	0.03776
6VAX-F	2648	GLYCERIC ACID URINE	1	1	1	2647	0	604575	-100.00000	-100.00000	-100.00000	0.00436	True	0.03776
6VAX-F	2648	GLYCOSYLATED HAEMOGLOBIN INCREASED	93	1	1	2647	92	604483	2.48167	0.34600	17.79978	0.33401	False	0.03776
6VAX-F	2648	GLYCOSYLATED HAEMOGLOBIN NORMAL	37	1	1	2647	36	604539	6.34205	0.86982	46.24120	0.14931	False	0.03776
6VAX-F	2648	GRAM STAIN NEGATIVE	117	1	1	2647	116	604459	1.96822	0.27502	14.08613	0.40033	False	0.03776
6VAX-F	2648	GRAND MAL CONVULSION	1377	30	30	2618	1347	603228	5.08494	3.54839	7.28686	0.00000	True	1.13293
6VAX-F	2648	GRANULOCYTE COUNT	44	4	4	2644	40	604535	22.83138	8.17444	63.76852	0.00004	True	0.15106
6VAX-F	2648	GRANULOCYTE COUNT DECREASED	27	3	3	2645	24	604551	28.53923	8.59892	94.71973	0.00022	True	0.11329
6VAX-F	2648	GRANULOCYTE COUNT INCREASED	40	1	1	2647	39	604536	5.85420	0.80457	42.59605	0.16039	False	0.03776
6VAX-F	2648	GRANULOCYTE PERCENTAGE	49	6	6	2642	43	604532	31.85774	13.57139	74.78348	0.00000	True	0.22659
6VAX-F	2648	GRANULOCYTOPENIA	14	2	2	2646	12	604563	38.05230	8.52049	169.94071	0.00167	True	0.07553
6VAX-F	2648	GRANULOMA	140	3	3	2645	137	604438	4.99957	1.59370	15.68406	0.02384	True	0.11329
6VAX-F	2648	GRIMACING	34	2	2	2646	32	604543	14.26961	3.42143	59.51364	0.00972	True	0.07553
6VAX-F	2648	GROSS MOTOR DELAY	19	1	1	2647	18	604557	12.68410	1.69385	94.98282	0.07968	False	0.03776
6VAX-F	2648	GROWTH RETARDATION	97	5	5	2643	92	604483	12.40836	5.04874	30.49623	0.00007	True	0.18882
6VAX-F	2648	GRUNTING	174	4	4	2644	170	604405	5.37209	1.99469	14.46807	0.00741	True	0.15106
6VAX-F	2648	GUILLAIN-BARRE SYNDROME	3352	2	2	2646	3350	601225	0.13631	0.03409	0.54497	0.00010	True	0.07553
6VAX-F	2648	HAEMANGIOMA	48	3	3	2645	45	604530	15.22092	4.73308	48.94834	0.00124	True	0.11329
6VAX-F	2648	HAEMARTHROSIS	7	1	1	2647	6	604569	38.05230	4.58259	315.97384	0.03013	True	0.03776
6VAX-F	2648	HAEMATEMESIS	232	8	8	2640	224	604351	8.15407	4.03223	16.48933	0.00001	True	0.30211
6VAX-F	2648	HAEMATOCHEZIA	2058	93	93	2555	1965	602610	10.80569	8.80755	13.25715	0.00000	True	3.51208
6VAX-F	2648	HAEMATOCRIT	49	3	3	2645	46	604529	14.89003	4.63387	47.84621	0.00131	True	0.11329
6VAX-F	2648	HAEMATOCRIT DECREASED	582	47	47	2601	535	604040	20.05748	14.92244	26.95955	0.00000	True	1.77492
6VAX-F	2648	HAEMATOCRIT INCREASED	43	2	2	2646	41	604534	11.13726	2.69522	46.02169	0.01525	True	0.07553
6VAX-F	2648	HAEMATOCRIT NORMAL	567	28	28	2620	539	604036	11.86046	8.12730	17.30840	0.00000	True	1.05740
6VAX-F	2648	HAEMATOLOGY TEST	70	2	2	2646	68	604507	6.71511	1.64661	27.38527	0.03776	True	0.07553
6VAX-F	2648	HAEMATOLOGY TEST ABNORMAL	24	1	1	2647	23	604552	9.92669	1.34103	73.48037	0.09958	False	0.03776
6VAX-F	2648	HAEMATOLOGY TEST NORMAL	98	4	4	2644	94	604481	9.71548	3.57446	26.40692	0.00094	True	0.15106
6VAX-F	2648	HAEMATOMA	450	12	12	2636	438	604137	6.25517	3.52958	11.08551	0.00000	True	0.45317
6VAX-F	2648	HAEMATURIA	394	1	1	2647	393	604182	0.58095	0.08166	4.13312	1.00000	False	0.03776
6VAX-F	2648	HAEMODYNAMIC INSTABILITY	18	1	1	2647	17	604558	13.43022	1.78791	100.88385	0.07565	False	0.03776
6VAX-F	2648	HAEMODYNAMIC TEST ABNORMAL	3	1	1	2647	2	604573	114.15691	10.35405	1258.61897	0.01303	True	0.03776
6VAX-F	2648	HAEMOGLOBIN	121	4	4	2644	117	604458	7.80560	2.88337	21.13059	0.00205	True	0.15106
6VAX-F	2648	HAEMOGLOBIN DECREASED	961	63	63	2585	898	603677	16.01756	12.44230	20.62017	0.00000	True	2.37915
6VAX-F	2648	HAEMOGLOBIN ELECTROPHORESIS ABNORMAL	2	1	1	2647	1	604574	228.31382	14.28379	3649.39553	0.00870	True	0.03776
6VAX-F	2648	HAEMOGLOBIN INCREASED	114	8	8	2640	106	604469	17.23123	8.40729	35.31641	0.00000	True	0.30211
6VAX-F	2648	HAEMOGLOBIN NORMAL	1258	77	77	2571	1181	603394	14.88583	11.85871	18.68566	0.00000	True	2.90785
6VAX-F	2648	HAEMOGLOBIN URINE ABSENT	7	1	1	2647	6	604569	38.05230	4.58259	315.97384	0.03013	True	0.03776
6VAX-F	2648	HAEMOLYSIS	91	4	4	2644	87	604488	10.49719	3.85572	28.57853	0.00071	True	0.15106
6VAX-F	2648	HAEMOLYTIC ANAEMIA	150	3	3	2645	147	604428	4.65947	1.48653	14.60492	0.02845	True	0.11329
6VAX-F	2648	HAEMOLYTIC URAEMIC SYNDROME	52	2	2	2646	50	604525	9.13255	2.22328	37.51369	0.02182	True	0.07553
6VAX-F	2648	HAEMOPHILUS INFECTION	80	5	5	2643	75	604500	15.22092	6.16070	37.60552	0.00003	True	0.18882
6VAX-F	2648	HAEMOPHILUS TEST POSITIVE	54	3	3	2645	51	604524	13.43022	4.19427	43.00410	0.00174	True	0.11329
6VAX-F	2648	HAEMOPTYSIS	179	1	1	2647	178	604397	1.28266	0.17975	9.15284	0.54270	False	0.03776
6VAX-F	2648	HAEMORRHAGE	893	9	9	2639	884	603691	2.32446	1.20677	4.47734	0.01806	True	0.33988
6VAX-F	2648	HAEMORRHAGIC ANAEMIA	3	1	1	2647	2	604573	114.15691	10.35405	1258.61897	0.01303	True	0.03776
6VAX-F	2648	HAEMORRHAGIC DIATHESIS	12	1	1	2647	11	604564	20.75580	2.68057	160.71348	0.05109	False	0.03776
6VAX-F	2648	HAEMORRHAGIC DISORDER	13	1	1	2647	12	604563	19.02615	2.47475	146.27523	0.05523	False	0.03776
6VAX-F	2648	HAEMORRHAGIC INFARCTION	1	1	1	2647	0	604575	-100.00000	-100.00000	-100.00000	0.00436	True	0.03776
6VAX-F	2648	HAIR METAL TEST	10	1	1	2647	9	604566	25.36820	3.21500	200.16965	0.04276	True	0.03776
6VAX-F	2648	HAIR METAL TEST NORMAL	3	1	1	2647	2	604573	114.15691	10.35405	1258.61897	0.01303	True	0.03776
6VAX-F	2648	HALLUCINATION	583	1	1	2647	582	603993	0.39229	0.05519	2.78866	0.52914	False	0.03776
6VAX-F	2648	HAND-EYE COORDINATION IMPAIRED	7	1	1	2647	6	604569	38.05230	4.58259	315.97384	0.03013	True	0.03776
6VAX-F	2648	HAPTOGLOBIN	4	1	1	2647	3	604572	76.10461	7.91863	731.42883	0.01733	True	0.03776
6VAX-F	2648	HAPTOGLOBIN DECREASED	17	1	1	2647	16	604559	14.26961	1.89302	107.56480	0.07160	False	0.03776
6VAX-F	2648	HAPTOGLOBIN INCREASED	8	1	1	2647	7	604568	32.61626	4.01417	265.01630	0.03436	True	0.03776
6VAX-F	2648	HAPTOGLOBIN NORMAL	13	1	1	2647	12	604563	19.02615	2.47475	146.27523	0.05523	False	0.03776
6VAX-F	2648	HEAD BANGING	91	2	2	2646	89	604486	5.13065	1.26407	20.82443	0.06034	False	0.07553
6VAX-F	2648	HEAD CIRCUMFERENCE	5	2	2	2646	3	604572	152.20921	25.44289	910.57455	0.00019	True	0.07553
6VAX-F	2648	HEAD CIRCUMFERENCE ABNORMAL	17	7	7	2641	10	604565	159.81968	60.87985	419.55311	0.00000	True	0.26435
6VAX-F	2648	HEAD CIRCUMFERENCE NORMAL	9	3	3	2645	6	604569	114.15691	28.56466	456.22104	0.00001	True	0.11329
6VAX-F	2648	HEAD DEFORMITY	12	2	2	2646	10	604565	45.66276	10.00969	208.30695	0.00122	True	0.07553
6VAX-F	2648	HEAD LAG	18	1	1	2647	17	604558	13.43022	1.78791	100.88385	0.07565	False	0.03776
6VAX-F	2648	HEAD TITUBATION	54	4	4	2644	50	604525	18.26511	6.60127	50.53786	0.00010	True	0.15106
6VAX-F	2648	HEADACHE	36607	5	5	2643	36602	567973	0.03119	0.01299	0.07488	0.00000	True	0.18882
6VAX-F	2648	HEARING IMPAIRED	279	1	1	2647	278	604297	0.82127	0.11532	5.84888	1.00000	False	0.03776
6VAX-F	2648	HEART RATE ABNORMAL	51	1	1	2647	50	604525	4.56628	0.63101	33.04377	0.19980	False	0.03776
6VAX-F	2648	HEART RATE DECREASED	506	8	8	2640	498	604077	3.66769	1.82595	7.36712	0.00195	True	0.30211
6VAX-F	2648	HEART RATE INCREASED	3248	16	16	2632	3232	601343	1.13027	0.69262	1.84445	0.59174	False	0.60423
6VAX-F	2648	HEART RATE IRREGULAR	359	3	3	2645	356	604219	1.92399	0.61797	5.99021	0.20750	False	0.11329
6VAX-F	2648	HEART RATE NORMAL	294	4	4	2644	290	604285	3.14916	1.17485	8.44126	0.04092	True	0.15106
6VAX-F	2648	HEAT RASH	46	1	1	2647	45	604530	5.07364	0.69961	36.79452	0.18212	False	0.03776
6VAX-F	2648	HEAT STROKE	11	1	1	2647	10	604565	22.83138	2.92363	178.29632	0.04694	True	0.03776
6VAX-F	2648	HELICOBACTER TEST NEGATIVE	63	6	6	2642	57	604518	24.03303	10.37157	55.68941	0.00000	True	0.22659
6VAX-F	2648	HEMIPARESIS	528	11	11	2637	517	604058	4.85774	2.67668	8.81600	0.00003	True	0.41541
6VAX-F	2648	HEMIPLEGIA	291	5	5	2643	286	604289	3.99150	1.65008	9.65533	0.00949	True	0.18882
6VAX-F	2648	HEPATIC ENZYME	44	1	1	2647	43	604532	5.30962	0.73142	38.54449	0.17494	False	0.03776
6VAX-F	2648	HEPATIC ENZYME INCREASED	296	2	2	2646	294	604281	1.55316	0.38681	6.23638	0.37017	False	0.07553
6VAX-F	2648	HEPATIC FAILURE	90	1	1	2647	89	604486	2.56532	0.35753	18.40635	0.32522	False	0.03776
6VAX-F	2648	HEPATITIS	656	1	1	2647	655	603920	0.34857	0.04904	2.47740	0.54162	False	0.03776
6VAX-F	2648	HEPATITIS A ANTIBODY NEGATIVE	120	2	2	2646	118	604457	3.86973	0.95703	15.64713	0.09701	False	0.07553
6VAX-F	2648	HEPATITIS A VIRUS TEST	37	2	2	2646	35	604540	13.04650	3.13947	54.21654	0.01144	True	0.07553
6VAX-F	2648	HEPATITIS B	222	1	1	2647	221	604354	1.03309	0.14493	7.36410	0.62107	False	0.03776
6VAX-F	2648	HEPATITIS B ANTIBODY NEGATIVE	589	1	1	2647	588	603987	0.38829	0.05462	2.76016	0.52961	False	0.03776
6VAX-F	2648	HEPATITIS B ANTIBODY POSITIVE	64	3	3	2645	61	604514	11.22855	3.52538	35.76357	0.00283	True	0.11329
6VAX-F	2648	HEPATITIS B ANTIGEN POSITIVE	52	1	1	2647	51	604524	4.47674	0.61887	32.38352	0.20329	False	0.03776
6VAX-F	2648	HEPATITIS B CORE ANTIBODY NEGATIVE	102	2	2	2646	100	604475	4.56628	1.12693	18.50234	0.07359	False	0.07553
6VAX-F	2648	HEPATITIS B E ANTIGEN POSITIVE	27	1	1	2647	26	604549	8.78130	1.19202	64.68934	0.11131	False	0.03776
6VAX-F	2648	HEPATITIS B SURFACE ANTIGEN NEGATIVE	242	5	5	2643	237	604338	4.81675	1.98811	11.66990	0.00445	True	0.18882
6VAX-F	2648	HEPATITIS B SURFACE ANTIGEN POSITIVE	251	4	4	2644	247	604328	3.69739	1.37776	9.92238	0.02501	True	0.15106
6VAX-F	2648	HEPATITIS B TEST NEGATIVE	141	1	1	2647	140	604435	1.63081	0.22820	11.65454	0.46006	False	0.03776
6VAX-F	2648	HEPATITIS B VIRUS TEST POSITIVE	59	1	1	2647	58	604517	3.93645	0.54543	28.40979	0.22730	False	0.03776
6VAX-F	2648	HEPATITIS C ANTIBODY NEGATIVE	188	3	3	2645	185	604390	3.70239	1.18397	11.57773	0.04991	True	0.11329
6VAX-F	2648	HEPATITIS C ANTIBODY POSITIVE	16	1	1	2647	15	604560	15.22092	2.01124	115.19084	0.06754	False	0.03776
6VAX-F	2648	HEPATITIS C TEST NEGATIVE	160	3	3	2645	157	604418	4.36268	1.39286	13.66471	0.03350	True	0.11329
6VAX-F	2648	HEPATITIS VIRAL	14	1	1	2647	13	604562	17.56260	2.29824	134.20945	0.05935	False	0.03776
6VAX-F	2648	HEPATITIS VIRAL TEST NEGATIVE	66	2	2	2646	64	604511	7.13481	1.74732	29.13340	0.03392	True	0.07553
6VAX-F	2648	HEPATOCELLULAR INJURY	17	2	2	2646	15	604560	30.44184	6.96486	133.05447	0.00248	True	0.07553
6VAX-F	2648	HEPATOMEGALY	245	2	2	2646	243	604332	1.87913	0.46753	7.55269	0.28945	False	0.07553
6VAX-F	2648	HEPATOSPLENOMEGALY	70	5	5	2643	65	604510	17.56260	7.07768	43.57997	0.00002	True	0.18882
6VAX-F	2648	HERNIA	53	1	1	2647	52	604523	4.39065	0.60719	31.74914	0.20677	False	0.03776
6VAX-F	2648	HERPANGINA	23	2	2	2646	21	604554	21.74417	5.10093	92.69075	0.00453	True	0.07553
6VAX-F	2648	HERPES SIMPLEX	292	1	1	2647	291	604284	0.78458	0.11018	5.58672	1.00000	False	0.03776
6VAX-F	2648	HERPES SIMPLEX SEROLOGY	37	1	1	2647	36	604539	6.34205	0.86982	46.24120	0.14931	False	0.03776
6VAX-F	2648	HERPES SIMPLEX SEROLOGY NEGATIVE	358	19	19	2629	339	604236	12.79635	8.07405	20.28060	0.00000	True	0.71752
6VAX-F	2648	HERPES SIMPLEX SEROLOGY POSITIVE	68	3	3	2645	65	604510	10.53756	3.31398	33.50660	0.00336	True	0.11329
6VAX-F	2648	HERPES SIMPLEX TEST NEGATIVE	57	4	4	2644	53	604522	17.23123	6.24095	47.57536	0.00012	True	0.15106
6VAX-F	2648	HERPES VIRUS INFECTION	122	1	1	2647	121	604454	1.88689	0.26374	13.49937	0.41330	False	0.03776
6VAX-F	2648	HERPES ZOSTER	8409	2	2	2646	8407	596168	0.05432	0.01359	0.21710	0.00000	True	0.07553
6VAX-F	2648	HICCUPS	56	1	1	2647	55	604520	4.15116	0.57466	29.98680	0.21710	False	0.03776
6VAX-F	2648	HIGH-PITCHED CRYING	177	1	1	2647	176	604399	1.29724	0.18178	9.25743	0.53868	False	0.03776
6VAX-F	2648	HISTIOCYTOSIS HAEMATOPHAGIC	31	2	2	2646	29	604546	15.74578	3.75902	65.95595	0.00813	True	0.07553
6VAX-F	2648	HISTOLOGY	18	2	2	2646	16	604559	28.53923	6.56515	124.06230	0.00278	True	0.07553
6VAX-F	2648	HISTOLOGY ABNORMAL	92	3	3	2645	89	604486	7.69597	2.43710	24.30262	0.00780	True	0.11329
6VAX-F	2648	HISTOLOGY NORMAL	9	1	1	2647	8	604567	28.53923	3.57061	228.10887	0.03857	True	0.03776
6VAX-F	2648	HIV TEST NEGATIVE	339	4	4	2644	335	604240	2.72614	1.01795	7.30076	0.06249	False	0.15106
6VAX-F	2648	HUMAN HERPES VIRUS 6 SEROLOGY	7	1	1	2647	6	604569	38.05230	4.58259	315.97384	0.03013	True	0.03776
6VAX-F	2648	HUMAN HERPES VIRUS 6 SEROLOGY NEGATIVE	44	4	4	2644	40	604535	22.83138	8.17444	63.76852	0.00004	True	0.15106
6VAX-F	2648	HUMAN PAPILLOMA VIRUS TEST NEGATIVE	17	1	1	2647	16	604559	14.26961	1.89302	107.56480	0.07160	False	0.03776
6VAX-F	2648	HUMAN RHINOVIRUS TEST POSITIVE	18	2	2	2646	16	604559	28.53923	6.56515	124.06230	0.00278	True	0.07553
6VAX-F	2648	HYDROCELE	13	2	2	2646	11	604564	41.51160	9.20542	187.19547	0.00144	True	0.07553
6VAX-F	2648	HYDROCEPHALUS	102	3	3	2645	99	604476	6.91860	2.19509	21.80639	0.01032	True	0.11329
6VAX-F	2648	HYDRONEPHROSIS	33	1	1	2647	32	604543	7.13481	0.97527	52.19614	0.13431	False	0.03776
6VAX-F	2648	HYPERACUSIS	327	1	1	2647	326	604249	0.70035	0.09839	4.98511	1.00000	False	0.03776
6VAX-F	2648	HYPERAEMIA	201	6	6	2642	195	604380	7.02504	3.12050	15.81513	0.00028	True	0.22659
6VAX-F	2648	HYPERAESTHESIA	824	11	11	2637	813	603762	3.08912	1.70602	5.59351	0.00120	True	0.41541
6VAX-F	2648	HYPERAMMONAEMIA	11	1	1	2647	10	604565	22.83138	2.92363	178.29632	0.04694	True	0.03776
6VAX-F	2648	HYPERBILIRUBINAEMIA	243	1	1	2647	242	604333	0.94345	0.13240	6.72248	1.00000	False	0.03776
6VAX-F	2648	HYPERGLYCAEMIA	387	3	3	2645	384	604191	1.78370	0.57311	5.55150	0.23931	False	0.11329
6VAX-F	2648	HYPERHIDROSIS	8471	23	23	2625	8448	596127	0.62159	0.41357	0.93425	0.01960	True	0.86858
6VAX-F	2648	HYPERINSULINISM	5	1	1	2647	4	604571	57.07846	6.38156	510.52564	0.02161	True	0.03776
6VAX-F	2648	HYPERKALAEMIA	77	3	3	2645	74	604501	9.25597	2.92000	29.34005	0.00477	True	0.11329
6VAX-F	2648	HYPERKINESIA	150	1	1	2647	149	604426	1.53231	0.21451	10.94596	0.48089	False	0.03776
6VAX-F	2648	HYPERMETROPIA	12	1	1	2647	11	604564	20.75580	2.68057	160.71348	0.05109	False	0.03776
6VAX-F	2648	HYPERMOBILITY SYNDROME	20	1	1	2647	19	604556	12.01652	1.60918	89.73289	0.08370	False	0.03776
6VAX-F	2648	HYPERNATRAEMIA	22	1	1	2647	21	604554	10.87209	1.46293	80.79858	0.09167	False	0.03776
6VAX-F	2648	HYPERPHAGIA	17	1	1	2647	16	604559	14.26961	1.89302	107.56480	0.07160	False	0.03776
6VAX-F	2648	HYPERPLASIA	59	1	1	2647	58	604517	3.93645	0.54543	28.40979	0.22730	False	0.03776
6VAX-F	2648	HYPERPYREXIA	437	61	61	2587	376	604199	37.04027	28.33700	48.41663	0.00000	True	2.30363
6VAX-F	2648	HYPERREFLEXIA	235	6	6	2642	229	604346	5.98202	2.66200	13.44276	0.00064	True	0.22659
6VAX-F	2648	HYPERSENSITIVITY	7029	33	33	2615	6996	597579	1.07695	0.76665	1.51285	0.64833	False	1.24622
6VAX-F	2648	HYPERSOMNIA	974	26	26	2622	948	603627	6.26177	4.24913	9.22772	0.00000	True	0.98187
6VAX-F	2648	HYPERTENSION	2149	4	4	2644	2145	602430	0.42576	0.15977	1.13461	0.09713	False	0.15106
6VAX-F	2648	HYPERTHERMIA	257	16	16	2632	241	604334	15.15776	9.15180	25.10521	0.00000	True	0.60423
6VAX-F	2648	HYPERTONIA	2557	50	50	2598	2507	602068	4.55353	3.45071	6.00879	0.00000	True	1.88822
6VAX-F	2648	HYPERTRANSAMINASAEMIA	10	2	2	2646	8	604567	57.07846	12.12635	268.66696	0.00084	True	0.07553
6VAX-F	2648	HYPERVENTILATION	1028	2	2	2646	1026	603549	0.44506	0.11121	1.78104	0.34083	False	0.07553
6VAX-F	2648	HYPOAESTHESIA	9470	2	2	2646	9468	595107	0.04823	0.01207	0.19277	0.00000	True	0.07553
6VAX-F	2648	HYPOCALCAEMIA	53	1	1	2647	52	604523	4.39065	0.60719	31.74914	0.20677	False	0.03776
6VAX-F	2648	HYPOCHLORAEMIA	15	1	1	2647	14	604561	16.30813	2.14519	123.97716	0.06345	False	0.03776
6VAX-F	2648	HYPOCHROMIC ANAEMIA	117	1	1	2647	116	604459	1.96822	0.27502	14.08613	0.40033	False	0.03776
6VAX-F	2648	HYPOCITRATURIA	1	1	1	2647	0	604575	-100.00000	-100.00000	-100.00000	0.00436	True	0.03776
6VAX-F	2648	HYPOGAMMAGLOBULINAEMIA	21	1	1	2647	20	604555	11.41569	1.53257	85.03206	0.08769	False	0.03776
6VAX-F	2648	HYPOGLYCAEMIA	274	4	4	2644	270	604305	3.38243	1.26124	9.07105	0.03295	True	0.15106
6VAX-F	2648	HYPOKALAEMIA	174	7	7	2641	167	604408	9.57004	4.49706	20.36566	0.00001	True	0.26435
6VAX-F	2648	HYPOKINESIA	5282	8	8	2640	5274	599301	0.34632	0.17328	0.69216	0.00049	True	0.30211
6VAX-F	2648	HYPOMETABOLISM	10	1	1	2647	9	604566	25.36820	3.21500	200.16965	0.04276	True	0.03776
6VAX-F	2648	HYPONATRAEMIA	204	6	6	2642	198	604377	6.91860	3.07379	15.57265	0.00031	True	0.22659
6VAX-F	2648	HYPOPHAGIA	385	18	18	2630	367	604208	11.19795	6.98736	17.94585	0.00000	True	0.67976
6VAX-F	2648	HYPOPHOSPHATAEMIA	5	1	1	2647	4	604571	57.07846	6.38156	510.52564	0.02161	True	0.03776
6VAX-F	2648	HYPOPNOEA	173	10	10	2638	163	604412	14.00698	7.40505	26.49484	0.00000	True	0.37764
6VAX-F	2648	HYPOREFLEXIA	463	5	5	2643	458	604117	2.49251	1.03335	6.01209	0.05392	False	0.18882
6VAX-F	2648	HYPORESPONSIVE TO STIMULI	210	59	59	2589	151	604424	89.20871	66.18736	120.23738	0.00000	True	2.22810
6VAX-F	2648	HYPOSPADIAS	9	1	1	2647	8	604567	28.53923	3.57061	228.10887	0.03857	True	0.03776
6VAX-F	2648	HYPOTENSION	2475	16	16	2632	2459	602116	1.48557	0.91000	2.42518	0.12292	False	0.60423
6VAX-F	2648	HYPOTHERMIA	408	13	13	2635	395	604180	7.51413	4.33025	13.03898	0.00000	True	0.49094
6VAX-F	2648	HYPOTHYROIDISM	214	1	1	2647	213	604362	1.07190	0.15035	7.64196	0.60758	False	0.03776
6VAX-F	2648	HYPOTONIA	6136	366	366	2282	5770	598805	14.48230	13.12362	15.98164	0.00000	True	13.82175
6VAX-F	2648	HYPOTONIA NEONATAL	3	3	3	2645	0	604575	-100.00000	-100.00000	-100.00000	0.00000	True	0.11329
6VAX-F	2648	HYPOTONIC-HYPORESPONSIVE EPISODE	1026	149	149	2499	877	603698	38.78992	32.74442	45.95159	0.00000	True	5.62689
6VAX-F	2648	HYPOVENTILATION	510	4	4	2644	506	604069	1.80485	0.67527	4.82400	0.29254	False	0.15106
6VAX-F	2648	HYPOVOLAEMIA	42	2	2	2646	40	604535	11.41569	2.76032	47.21118	0.01458	True	0.07553
6VAX-F	2648	HYPOXIA	1060	18	18	2630	1042	603533	3.94400	2.47889	6.27503	0.00000	True	0.67976
6VAX-F	2648	HYPOXIC-ISCHAEMIC ENCEPHALOPATHY	25	1	1	2647	24	604551	9.51308	1.28739	70.29633	0.10350	False	0.03776
6VAX-F	2648	IDIOPATHIC NEUTROPENIA	1	1	1	2647	0	604575	-100.00000	-100.00000	-100.00000	0.00436	True	0.03776
6VAX-F	2648	IDIOPATHIC THROMBOCYTOPENIC PURPURA	437	14	14	2634	423	604152	7.55649	4.44307	12.85157	0.00000	True	0.52870
6VAX-F	2648	ILEAL PERFORATION	2	1	1	2647	1	604574	228.31382	14.28379	3649.39553	0.00870	True	0.03776
6VAX-F	2648	ILEITIS	21	1	1	2647	20	604555	11.41569	1.53257	85.03206	0.08769	False	0.03776
6VAX-F	2648	ILEOSTOMY	21	3	3	2645	18	604557	38.05230	11.21535	129.10682	0.00010	True	0.11329
6VAX-F	2648	ILEUS	59	1	1	2647	58	604517	3.93645	0.54543	28.40979	0.22730	False	0.03776
6VAX-F	2648	ILEUS PARALYTIC	15	2	2	2646	13	604562	35.12520	7.93023	155.57942	0.00192	True	0.07553
6VAX-F	2648	ILL-DEFINED DISORDER	40	3	3	2645	37	604538	18.51193	5.71130	60.00240	0.00073	True	0.11329
6VAX-F	2648	ILLUSION	52	1	1	2647	51	604524	4.47674	0.61887	32.38352	0.20329	False	0.03776
6VAX-F	2648	IMMEDIATE POST-INJECTION REACTION	6040	29	29	2619	6011	598564	1.10150	0.76631	1.58329	0.55604	False	1.09517
6VAX-F	2648	IMMOBILE	68	1	1	2647	67	604508	3.40767	0.47323	24.53823	0.25711	False	0.03776
6VAX-F	2648	IMMUNE SYSTEM DISORDER	757	2	2	2646	755	603820	0.60480	0.15106	2.42150	0.77856	False	0.07553
6VAX-F	2648	IMMUNE THROMBOCYTOPENIC PURPURA	145	2	2	2646	143	604432	3.19320	0.79133	12.88532	0.13237	False	0.07553
6VAX-F	2648	IMMUNISATION REACTION	221	1	1	2647	220	604355	1.03779	0.14559	7.39772	0.61941	False	0.03776
6VAX-F	2648	IMMUNODEFICIENCY	70	1	1	2647	69	604506	3.30890	0.45971	23.81695	0.26357	False	0.03776
6VAX-F	2648	IMMUNOGLOBULIN THERAPY	1170	23	23	2625	1147	603428	4.57822	3.03531	6.90542	0.00000	True	0.86858
6VAX-F	2648	IMMUNOGLOBULINS	75	1	1	2647	74	604501	3.08532	0.42905	22.18653	0.27949	False	0.03776
6VAX-F	2648	IMMUNOGLOBULINS DECREASED	90	2	2	2646	88	604487	5.18895	1.27821	21.06476	0.05918	False	0.07553
6VAX-F	2648	IMMUNOGLOBULINS NORMAL	88	5	5	2643	83	604492	13.75384	5.58214	33.88814	0.00005	True	0.18882
6VAX-F	2648	IMMUNOLOGY TEST	268	2	2	2646	266	604309	1.71665	0.42731	6.89625	0.32618	False	0.07553
6VAX-F	2648	IMMUNOLOGY TEST ABNORMAL	127	4	4	2644	123	604452	7.42484	2.74493	20.08366	0.00244	True	0.15106
6VAX-F	2648	IMMUNOLOGY TEST NORMAL	177	6	6	2642	171	604404	8.01101	3.55242	18.06552	0.00014	True	0.22659
6VAX-F	2648	IMMUNOPHENOTYPING	4	1	1	2647	3	604572	76.10461	7.91863	731.42883	0.01733	True	0.03776
6VAX-F	2648	IMPETIGO	71	1	1	2647	70	604505	3.26163	0.45323	23.47197	0.26678	False	0.03776
6VAX-F	2648	INABILITY TO CRAWL	43	4	4	2644	39	604536	23.41680	8.37400	65.48201	0.00004	True	0.15106
6VAX-F	2648	INAPPROPRIATE ANTIDIURETIC HORMONE SECRETION	20	1	1	2647	19	604556	12.01652	1.60918	89.73289	0.08370	False	0.03776
6VAX-F	2648	INAPPROPRIATE SCHEDULE OF DRUG ADMINISTRATION	8060	16	16	2632	8044	596531	0.45413	0.27849	0.74054	0.00045	True	0.60423
6VAX-F	2648	INCISIONAL DRAINAGE	138	4	4	2644	134	604441	6.81534	2.52285	18.41125	0.00328	True	0.15106
6VAX-F	2648	INCOMPLETE COURSE OF VACCINATION	211	1	1	2647	210	604365	1.08721	0.15249	7.75164	0.60240	False	0.03776
6VAX-F	2648	INCORRECT DOSE ADMINISTERED	2521	3	3	2645	2518	602057	0.27202	0.08773	0.84345	0.00928	True	0.11329
6VAX-F	2648	INCORRECT DRUG DOSAGE FORM ADMINISTERED	275	1	1	2647	274	604301	0.83326	0.11700	5.93457	1.00000	False	0.03776
6VAX-F	2648	INCORRECT PRODUCT STORAGE	27720	1	1	2647	27719	576856	0.00824	0.00116	0.05846	0.00000	True	0.03776
6VAX-F	2648	INCORRECT ROUTE OF DRUG ADMINISTRATION	1580	10	10	2638	1570	603005	1.45423	0.78182	2.70494	0.24474	False	0.37764
6VAX-F	2648	INCORRECT STORAGE OF DRUG	6905	1	1	2647	6904	597671	0.03307	0.00466	0.23472	0.00000	True	0.03776
6VAX-F	2648	INCREASED BRONCHIAL SECRETION	40	1	1	2647	39	604536	5.85420	0.80457	42.59605	0.16039	False	0.03776
6VAX-F	2648	INCREASED UPPER AIRWAY SECRETION	341	6	6	2642	335	604240	4.08920	1.82568	9.15910	0.00416	True	0.22659
6VAX-F	2648	INDURATION	3791	7	7	2641	3784	600791	0.42236	0.20141	0.88569	0.01301	True	0.26435
6VAX-F	2648	INFANTILE APNOEA	7	1	1	2647	6	604569	38.05230	4.58259	315.97384	0.03013	True	0.03776
6VAX-F	2648	INFANTILE APNOEIC ATTACK	14	1	1	2647	13	604562	17.56260	2.29824	134.20945	0.05935	False	0.03776
6VAX-F	2648	INFANTILE SEPTIC GRANULOMATOSIS	1	1	1	2647	0	604575	-100.00000	-100.00000	-100.00000	0.00436	True	0.03776
6VAX-F	2648	INFANTILE SPASMS	224	33	33	2615	191	604384	39.44689	27.31508	56.96695	0.00000	True	1.24622
6VAX-F	2648	INFANTILE SPITTING UP	208	5	5	2643	203	604372	5.62349	2.31754	13.64536	0.00234	True	0.18882
6VAX-F	2648	INFECTION	13014	20	20	2628	12994	591581	0.35141	0.22702	0.54398	0.00000	True	0.75529
6VAX-F	2648	INFECTION SUSCEPTIBILITY INCREASED	52	4	4	2644	48	604527	19.02615	6.86553	52.72640	0.00008	True	0.15106
6VAX-F	2648	INFLAMMATION	2176	22	22	2626	2154	602421	2.33190	1.53483	3.54290	0.00041	True	0.83082
6VAX-F	2648	INFLAMMATORY MARKER INCREASED	112	8	8	2640	104	604471	17.56260	8.56481	36.01305	0.00000	True	0.30211
6VAX-F	2648	INFLAMMATORY MARKER TEST	35	1	1	2647	34	604541	6.71511	0.91953	49.03865	0.14184	False	0.03776
6VAX-F	2648	INFLUENZA	4378	3	3	2645	4375	600200	0.15656	0.05051	0.48530	0.00001	True	0.11329
6VAX-F	2648	INFLUENZA A VIRUS TEST NEGATIVE	131	5	5	2643	126	604449	9.06007	3.70963	22.12753	0.00030	True	0.18882
6VAX-F	2648	INFLUENZA A VIRUS TEST POSITIVE	410	1	1	2647	409	604166	0.55822	0.07847	3.97104	1.00000	False	0.03776
6VAX-F	2648	INFLUENZA B VIRUS TEST	112	6	6	2642	106	604469	12.92342	5.68270	29.39006	0.00001	True	0.22659
6VAX-F	2648	INFLUENZA B VIRUS TEST POSITIVE	126	1	1	2647	125	604450	1.82651	0.25537	13.06401	0.42347	False	0.03776
6VAX-F	2648	INFLUENZA LIKE ILLNESS	5028	2	2	2646	5026	599549	0.09085	0.02273	0.36319	0.00000	True	0.07553
6VAX-F	2648	INFLUENZA SEROLOGY	67	1	1	2647	66	604509	3.45930	0.48029	24.91550	0.25385	False	0.03776
6VAX-F	2648	INFLUENZA SEROLOGY NEGATIVE	272	2	2	2646	270	604305	1.69121	0.42102	6.79356	0.33252	False	0.07553
6VAX-F	2648	INFLUENZA VIRUS TEST NEGATIVE	524	8	8	2640	516	604059	3.53975	1.76259	7.10876	0.00241	True	0.30211
6VAX-F	2648	INFREQUENT BOWEL MOVEMENTS	30	1	1	2647	29	604546	7.87289	1.07281	57.77560	0.12288	False	0.03776
6VAX-F	2648	INFUSION	17	2	2	2646	15	604560	30.44184	6.96486	133.05447	0.00248	True	0.07553
6VAX-F	2648	INGUINAL HERNIA	16	1	1	2647	15	604560	15.22092	2.01124	115.19084	0.06754	False	0.03776
6VAX-F	2648	INITIAL INSOMNIA	71	1	1	2647	70	604505	3.26163	0.45323	23.47197	0.26678	False	0.03776
6VAX-F	2648	INJECTED LIMB MOBILITY DECREASED	4637	1	1	2647	4636	599939	0.04925	0.00694	0.34957	0.00000	True	0.03776
6VAX-F	2648	INJECTION SITE ABSCESS	1032	14	14	2634	1018	603557	3.13988	1.85548	5.31335	0.00024	True	0.52870
6VAX-F	2648	INJECTION SITE ANAESTHESIA	391	1	1	2647	390	604185	0.58542	0.08229	4.16499	1.00000	False	0.03776
6VAX-F	2648	INJECTION SITE BRUISING	1177	1	1	2647	1176	603399	0.19414	0.02733	1.37893	0.07220	False	0.03776
6VAX-F	2648	INJECTION SITE CELLULITIS	2380	3	3	2645	2377	602198	0.28815	0.09293	0.89352	0.01766	True	0.11329
6VAX-F	2648	INJECTION SITE COLDNESS	18	2	2	2646	16	604559	28.53923	6.56515	124.06230	0.00278	True	0.07553
6VAX-F	2648	INJECTION SITE DISCHARGE	238	1	1	2647	237	604338	0.96335	0.13519	6.86489	1.00000	False	0.03776
6VAX-F	2648	INJECTION SITE DISCOLOURATION	1190	3	3	2645	1187	603388	0.57704	0.18596	1.79058	0.50415	False	0.11329
6VAX-F	2648	INJECTION SITE DISCOMFORT	621	1	1	2647	620	603955	0.36825	0.05181	2.61748	0.53388	False	0.03776
6VAX-F	2648	INJECTION SITE DRYNESS	58	1	1	2647	57	604518	4.00551	0.55484	28.91671	0.22392	False	0.03776
6VAX-F	2648	INJECTION SITE ECZEMA	29	2	2	2646	27	604548	16.91213	4.02367	71.08435	0.00714	True	0.07553
6VAX-F	2648	INJECTION SITE ERYTHEMA	64753	82	82	2566	64671	539904	0.28949	0.23391	0.35828	0.00000	True	3.09668
6VAX-F	2648	INJECTION SITE EXTRAVASATION	221	1	1	2647	220	604355	1.03779	0.14559	7.39772	0.61941	False	0.03776
6VAX-F	2648	INJECTION SITE GRANULOMA	61	3	3	2645	58	604517	11.80934	3.70253	37.66630	0.00247	True	0.11329
6VAX-F	2648	INJECTION SITE HAEMATOMA	1007	3	3	2645	1004	603571	0.68221	0.21979	2.11751	0.80761	False	0.11329
6VAX-F	2648	INJECTION SITE HAEMORRHAGE	890	7	7	2641	883	603692	1.80996	0.86118	3.80405	0.11845	False	0.26435
6VAX-F	2648	INJECTION SITE HYPERSENSITIVITY	17844	2	2	2646	17842	586733	0.02559	0.00640	0.10229	0.00000	True	0.07553
6VAX-F	2648	INJECTION SITE INDURATION	12921	21	21	2627	12900	591675	0.37167	0.24266	0.56928	0.00000	True	0.79305
6VAX-F	2648	INJECTION SITE INFECTION	558	1	1	2647	557	604018	0.40990	0.05766	2.91405	0.73972	False	0.03776
6VAX-F	2648	INJECTION SITE INFLAMMATION	3142	9	9	2639	3133	601442	0.65586	0.34131	1.26031	0.27429	False	0.33988
6VAX-F	2648	INJECTION SITE JOINT SWELLING	40	1	1	2647	39	604536	5.85420	0.80457	42.59605	0.16039	False	0.03776
6VAX-F	2648	INJECTION SITE MASS	10380	9	9	2639	10371	594204	0.19813	0.10318	0.38048	0.00000	True	0.33988
6VAX-F	2648	INJECTION SITE MOVEMENT IMPAIRMENT	213	5	5	2643	208	604367	5.48831	2.26241	13.31393	0.00259	True	0.18882
6VAX-F	2648	INJECTION SITE NECROSIS	118	1	1	2647	117	604458	1.95140	0.27268	13.96474	0.40295	False	0.03776
6VAX-F	2648	INJECTION SITE NODULE	1966	15	15	2633	1951	602624	1.75536	1.05770	2.91319	0.03730	True	0.56647
6VAX-F	2648	INJECTION SITE OEDEMA	21544	20	20	2628	21524	583051	0.21215	0.13707	0.32835	0.00000	True	0.75529
6VAX-F	2648	INJECTION SITE PAIN	47377	27	27	2621	47350	557225	0.13019	0.08944	0.18950	0.00000	True	1.01964
6VAX-F	2648	INJECTION SITE PLAQUE	24	1	1	2647	23	604552	9.92669	1.34103	73.48037	0.09958	False	0.03776
6VAX-F	2648	INJECTION SITE PRURITUS	9326	5	5	2643	9321	595254	0.12247	0.05101	0.29407	0.00000	True	0.18882
6VAX-F	2648	INJECTION SITE RASH	7389	8	8	2640	7381	597194	0.24746	0.12384	0.49450	0.00000	True	0.30211
6VAX-F	2648	INJECTION SITE REACTION	11881	30	30	2618	11851	592724	0.57796	0.40474	0.82531	0.00119	True	1.13293
6VAX-F	2648	INJECTION SITE SWELLING	41751	48	48	2600	41703	562872	0.26279	0.19852	0.34787	0.00000	True	1.81269
6VAX-F	2648	INJECTION SITE URTICARIA	2700	7	7	2641	2693	601882	0.59346	0.28293	1.24484	0.18739	False	0.26435
6VAX-F	2648	INJECTION SITE WARMTH	25033	14	14	2634	25019	579556	0.12776	0.07576	0.21545	0.00000	True	0.52870
6VAX-F	2648	INSOMNIA	5033	35	35	2613	4998	599577	1.59884	1.14914	2.22451	0.00934	True	1.32175
6VAX-F	2648	INSULIN TOLERANCE TEST	1	1	1	2647	0	604575	-100.00000	-100.00000	-100.00000	0.00436	True	0.03776
6VAX-F	2648	INTENSIVE CARE	1316	54	54	2594	1262	603313	9.76937	7.46012	12.79344	0.00000	True	2.03927
6VAX-F	2648	INTENTIONAL SELF-INJURY	33	1	1	2647	32	604543	7.13481	0.97527	52.19614	0.13431	False	0.03776
6VAX-F	2648	INTERLEUKIN LEVEL	34	7	7	2641	27	604548	59.19247	25.79958	135.80644	0.00000	True	0.26435
6VAX-F	2648	INTERLEUKIN LEVEL INCREASED	21	3	3	2645	18	604557	38.05230	11.21535	129.10682	0.00010	True	0.11329
6VAX-F	2648	INTERMITTENT POSITIVE PRESSURE BREATHING	4	1	1	2647	3	604572	76.10461	7.91863	731.42883	0.01733	True	0.03776
6VAX-F	2648	INTERNATIONAL NORMALISED RATIO	74	2	2	2646	72	604503	6.34205	1.55687	25.83500	0.04176	True	0.07553
6VAX-F	2648	INTERNATIONAL NORMALISED RATIO INCREASED	111	2	2	2646	109	604466	4.18924	1.03506	16.95539	0.08506	False	0.07553
6VAX-F	2648	INTERNATIONAL NORMALISED RATIO NORMAL	108	3	3	2645	105	604470	6.52325	2.07166	20.54046	0.01204	True	0.11329
6VAX-F	2648	INTESTINAL ANASTOMOSIS	29	2	2	2646	27	604548	16.91213	4.02367	71.08435	0.00714	True	0.07553
6VAX-F	2648	INTESTINAL FUNCTIONAL DISORDER	34	1	1	2647	33	604542	6.91860	0.94658	50.56819	0.13808	False	0.03776
6VAX-F	2648	INTESTINAL HAEMORRHAGE	36	1	1	2647	35	604540	6.52325	0.89399	47.59888	0.14558	False	0.03776
6VAX-F	2648	INTESTINAL ISCHAEMIA	15	1	1	2647	14	604561	16.30813	2.14519	123.97716	0.06345	False	0.03776
6VAX-F	2648	INTESTINAL MALROTATION	12	2	2	2646	10	604565	45.66276	10.00969	208.30695	0.00122	True	0.07553
6VAX-F	2648	INTESTINAL MASS	15	1	1	2647	14	604561	16.30813	2.14519	123.97716	0.06345	False	0.03776
6VAX-F	2648	INTESTINAL OBSTRUCTION	162	4	4	2644	158	604417	5.78010	2.14433	15.58040	0.00579	True	0.15106
6VAX-F	2648	INTESTINAL OPERATION	39	3	3	2645	36	604539	19.02615	5.86276	61.74476	0.00067	True	0.11329
6VAX-F	2648	INTESTINAL RESECTION	85	3	3	2645	82	604493	8.35294	2.64092	26.41950	0.00627	True	0.11329
6VAX-F	2648	INTRACRANIAL HAEMATOMA	1	1	1	2647	0	604575	-100.00000	-100.00000	-100.00000	0.00436	True	0.03776
6VAX-F	2648	INTRACRANIAL PRESSURE INCREASED	197	2	2	2646	195	604380	2.34168	0.58180	9.42498	0.21246	False	0.07553
6VAX-F	2648	INTUSSUSCEPTION	2000	83	83	2565	1917	602658	9.88526	7.96168	12.27359	0.00000	True	3.13444
6VAX-F	2648	INVESTIGATION	39	5	5	2643	34	604541	33.57556	13.14176	85.78141	0.00000	True	0.18882
6VAX-F	2648	IODINE DEFICIENCY	2	2	2	2646	0	604575	-100.00000	-100.00000	-100.00000	0.00002	True	0.07553
6VAX-F	2648	IRITIS	65	1	1	2647	64	604511	3.56740	0.49507	25.70594	0.24730	False	0.03776
6VAX-F	2648	IRON BINDING CAPACITY TOTAL	7	1	1	2647	6	604569	38.05230	4.58259	315.97384	0.03013	True	0.03776
6VAX-F	2648	IRON BINDING CAPACITY TOTAL NORMAL	18	1	1	2647	17	604558	13.43022	1.78791	100.88385	0.07565	False	0.03776
6VAX-F	2648	IRON DEFICIENCY ANAEMIA	40	1	1	2647	39	604536	5.85420	0.80457	42.59605	0.16039	False	0.03776
6VAX-F	2648	IRREGULAR BREATHING	12	3	3	2645	9	604566	76.10461	20.61461	280.96154	0.00002	True	0.11329
6VAX-F	2648	IRREGULAR SLEEP PHASE	4	1	1	2647	3	604572	76.10461	7.91863	731.42883	0.01733	True	0.03776
6VAX-F	2648	IRRITABILITY	7757	139	139	2509	7618	596957	4.16587	3.53804	4.90512	0.00000	True	5.24924
6VAX-F	2648	IRRITABILITY POSTVACCINAL	33	6	6	2642	27	604548	50.73640	20.96491	122.78529	0.00000	True	0.22659
6VAX-F	2648	JAUNDICE	720	3	3	2645	717	603858	0.95529	0.30756	2.96710	1.00000	False	0.11329
6VAX-F	2648	JAUNDICE CHOLESTATIC	22	2	2	2646	20	604555	22.83138	5.33913	97.63242	0.00414	True	0.07553
6VAX-F	2648	JOINT ABSCESS	3	1	1	2647	2	604573	114.15691	10.35405	1258.61897	0.01303	True	0.03776
6VAX-F	2648	JOINT HYPEREXTENSION	32	4	4	2644	28	604547	32.61626	11.44831	92.92376	0.00001	True	0.15106
6VAX-F	2648	JOINT STIFFNESS	985	1	1	2647	984	603591	0.23203	0.03266	1.64826	0.14171	False	0.03776
6VAX-F	2648	JOINT SWELLING	2044	6	6	2642	2038	602537	0.67217	0.30189	1.49659	0.40163	False	0.22659
6VAX-F	2648	JUGULAR VEIN THROMBOSIS	2	1	1	2647	1	604574	228.31382	14.28379	3649.39553	0.00870	True	0.03776
6VAX-F	2648	JUVENILE IDIOPATHIC ARTHRITIS	59	1	1	2647	58	604517	3.93645	0.54543	28.40979	0.22730	False	0.03776
6VAX-F	2648	JUVENILE MYOCLONIC EPILEPSY	8	1	1	2647	7	604568	32.61626	4.01417	265.01630	0.03436	True	0.03776
6VAX-F	2648	KARYOTYPE ANALYSIS ABNORMAL	3	1	1	2647	2	604573	114.15691	10.35405	1258.61897	0.01303	True	0.03776
6VAX-F	2648	KARYOTYPE ANALYSIS NORMAL	18	2	2	2646	16	604559	28.53923	6.56515	124.06230	0.00278	True	0.07553
6VAX-F	2648	KAWASAKI'S DISEASE	348	35	35	2613	313	604262	25.53030	18.04060	36.12940	0.00000	True	1.32175
6VAX-F	2648	KETOACIDOSIS	33	1	1	2647	32	604543	7.13481	0.97527	52.19614	0.13431	False	0.03776
6VAX-F	2648	KETONURIA	20	1	1	2647	19	604556	12.01652	1.60918	89.73289	0.08370	False	0.03776
6VAX-F	2648	KIDNEY ENLARGEMENT	14	1	1	2647	13	604562	17.56260	2.29824	134.20945	0.05935	False	0.03776
6VAX-F	2648	KLEBSIELLA TEST POSITIVE	18	1	1	2647	17	604558	13.43022	1.78791	100.88385	0.07565	False	0.03776
6VAX-F	2648	KLIPPEL-TRENAUNAY SYNDROME	1	1	1	2647	0	604575	-100.00000	-100.00000	-100.00000	0.00436	True	0.03776
6VAX-F	2648	KUSSMAUL RESPIRATION	3	1	1	2647	2	604573	114.15691	10.35405	1258.61897	0.01303	True	0.03776
6VAX-F	2648	LABORATORY TEST	2932	26	26	2622	2906	601669	2.04273	1.39107	2.99965	0.00098	True	0.98187
6VAX-F	2648	LABORATORY TEST ABNORMAL	6327	32	32	2616	6295	598280	1.16061	0.82176	1.63919	0.38699	False	1.20846
6VAX-F	2648	LABORATORY TEST NORMAL	2722	82	82	2566	2640	601935	7.09157	5.71140	8.80524	0.00000	True	3.09668
6VAX-F	2648	LACERATION	198	1	1	2647	197	604378	1.15895	0.16250	8.26570	0.57915	False	0.03776
6VAX-F	2648	LACRIMATION INCREASED	1039	3	3	2645	1036	603539	0.66114	0.21302	2.05199	0.63844	False	0.11329
6VAX-F	2648	LACTIC ACIDOSIS	18	1	1	2647	17	604558	13.43022	1.78791	100.88385	0.07565	False	0.03776
6VAX-F	2648	LANGUAGE DISORDER	18	1	1	2647	17	604558	13.43022	1.78791	100.88385	0.07565	False	0.03776
6VAX-F	2648	LAPAROSCOPIC SURGERY	33	2	2	2646	31	604544	14.72992	3.52702	61.51675	0.00918	True	0.07553
6VAX-F	2648	LAPAROSCOPY	26	1	1	2647	25	604550	9.13255	1.23787	67.37651	0.10741	False	0.03776
6VAX-F	2648	LAPAROTOMY	107	13	13	2635	94	604481	31.57532	17.70158	56.32268	0.00000	True	0.49094
6VAX-F	2648	LARGE INTESTINAL OBSTRUCTION REDUCTION	7	1	1	2647	6	604569	38.05230	4.58259	315.97384	0.03013	True	0.03776
6VAX-F	2648	LARYNGITIS	396	2	2	2646	394	604181	1.15895	0.28898	4.64799	0.69269	False	0.07553
6VAX-F	2648	LARYNGOSPASM	792	2	2	2646	790	603785	0.57801	0.14438	2.31403	0.78234	False	0.07553
6VAX-F	2648	LEFT ATRIAL DILATATION	5	1	1	2647	4	604571	57.07846	6.38156	510.52564	0.02161	True	0.03776
6VAX-F	2648	LEFT VENTRICULAR DYSFUNCTION	23	2	2	2646	21	604554	21.74417	5.10093	92.69075	0.00453	True	0.07553
6VAX-F	2648	LEFT VENTRICULAR FAILURE	8	1	1	2647	7	604568	32.61626	4.01417	265.01630	0.03436	True	0.03776
6VAX-F	2648	LETHARGY	4911	72	72	2576	4839	599736	3.39711	2.70033	4.27367	0.00000	True	2.71903
6VAX-F	2648	LEUKOCYTOCLASTIC VASCULITIS	103	2	2	2646	101	604474	4.52107	1.11593	18.31666	0.07484	False	0.07553
6VAX-F	2648	LEUKOCYTOSIS	1532	21	21	2627	1511	603064	3.17312	2.06626	4.87291	0.00001	True	0.79305
6VAX-F	2648	LEUKOCYTURIA	10	2	2	2646	8	604567	57.07846	12.12635	268.66696	0.00084	True	0.07553
6VAX-F	2648	LEUKODYSTROPHY	9	3	3	2645	6	604569	114.15691	28.56466	456.22104	0.00001	True	0.11329
6VAX-F	2648	LEUKOENCEPHALOPATHY	10	2	2	2646	8	604567	57.07846	12.12635	268.66696	0.00084	True	0.07553
6VAX-F	2648	LEUKOPENIA	564	8	8	2640	556	604019	3.28509	1.63641	6.59480	0.00375	True	0.30211
6VAX-F	2648	LID SULCUS DEEPENED	12	1	1	2647	11	604564	20.75580	2.68057	160.71348	0.05109	False	0.03776
6VAX-F	2648	LIGHT CHAIN ANALYSIS ABNORMAL	1	1	1	2647	0	604575	-100.00000	-100.00000	-100.00000	0.00436	True	0.03776
6VAX-F	2648	LIGHT CHAIN ANALYSIS DECREASED	1	1	1	2647	0	604575	-100.00000	-100.00000	-100.00000	0.00436	True	0.03776
6VAX-F	2648	LIMB IMMOBILISATION	26	1	1	2647	25	604550	9.13255	1.23787	67.37651	0.10741	False	0.03776
6VAX-F	2648	LINEAR IGA DISEASE	7	2	2	2646	5	604570	91.32553	17.72580	470.52057	0.00039	True	0.07553
6VAX-F	2648	LIP DISCOLOURATION	59	1	1	2647	58	604517	3.93645	0.54543	28.40979	0.22730	False	0.03776
6VAX-F	2648	LIP DRY	64	2	2	2646	62	604513	7.36496	1.80245	30.09388	0.03206	True	0.07553
6VAX-F	2648	LIP OEDEMA	93	1	1	2647	92	604483	2.48167	0.34600	17.79978	0.33401	False	0.03776
6VAX-F	2648	LIP SWELLING	2046	8	8	2640	2038	602537	0.89623	0.44806	1.79268	1.00000	False	0.30211
6VAX-F	2648	LIPASE	22	1	1	2647	21	604554	10.87209	1.46293	80.79858	0.09167	False	0.03776
6VAX-F	2648	LIPASE INCREASED	58	1	1	2647	57	604518	4.00551	0.55484	28.91671	0.22392	False	0.03776
6VAX-F	2648	LIPASE NORMAL	66	6	6	2642	60	604515	22.83138	9.87279	52.79884	0.00000	True	0.22659
6VAX-F	2648	LIPIDS NORMAL	46	1	1	2647	45	604530	5.07364	0.69961	36.79452	0.18212	False	0.03776
6VAX-F	2648	LIPOATROPHY	10	1	1	2647	9	604566	25.36820	3.21500	200.16965	0.04276	True	0.03776
6VAX-F	2648	LIQUID PRODUCT PHYSICAL ISSUE	39	1	1	2647	38	604537	6.00826	0.82521	43.74555	0.15671	False	0.03776
6VAX-F	2648	LISTERIA TEST	6	1	1	2647	5	604570	45.66276	5.33639	390.72979	0.02588	True	0.03776
6VAX-F	2648	LISTLESS	713	11	11	2637	702	603873	3.57757	1.97454	6.48202	0.00037	True	0.41541
6VAX-F	2648	LIVEDO RETICULARIS	272	20	20	2628	252	604323	18.12014	11.51094	28.52413	0.00000	True	0.75529
6VAX-F	2648	LIVER DISORDER	154	3	3	2645	151	604424	4.53604	1.44759	14.21373	0.03042	True	0.11329
6VAX-F	2648	LIVER FUNCTION TEST	143	1	1	2647	142	604433	1.60784	0.22501	11.48926	0.46476	False	0.03776
6VAX-F	2648	LIVER FUNCTION TEST ABNORMAL	528	4	4	2644	524	604051	1.74285	0.65216	4.65767	0.30020	False	0.15106
6VAX-F	2648	LIVER FUNCTION TEST NORMAL	465	8	8	2640	457	604118	3.99674	1.98877	8.03205	0.00115	True	0.30211
6VAX-F	2648	LIVER PALPABLE SUBCOSTAL	4	1	1	2647	3	604572	76.10461	7.91863	731.42883	0.01733	True	0.03776
6VAX-F	2648	LIVIDITY	117	8	8	2640	109	604466	16.75698	8.18159	34.32052	0.00000	True	0.30211
6VAX-F	2648	LOCAL REACTION	4035	22	22	2626	4013	600562	1.25166	0.82464	1.89979	0.27927	False	0.83082
6VAX-F	2648	LOCAL SWELLING	4162	6	6	2642	4156	600419	0.32962	0.14813	0.73345	0.00192	True	0.22659
6VAX-F	2648	LOCALISED INTRAABDOMINAL FLUID COLLECTION	5	1	1	2647	4	604571	57.07846	6.38156	510.52564	0.02161	True	0.03776
6VAX-F	2648	LOCALISED OEDEMA	153	5	5	2643	148	604427	7.71330	3.16623	18.79049	0.00060	True	0.18882
6VAX-F	2648	LOGORRHOEA	14	1	1	2647	13	604562	17.56260	2.29824	134.20945	0.05935	False	0.03776
6VAX-F	2648	LOSS OF CONSCIOUSNESS	7349	133	133	2515	7216	597359	4.20811	3.56015	4.97400	0.00000	True	5.02266
6VAX-F	2648	LOWER RESPIRATORY TRACT INFECTION	193	1	1	2647	192	604383	1.18913	0.16671	8.48205	0.56985	False	0.03776
6VAX-F	2648	LOWER RESPIRATORY TRACT INFLAMMATION	11	1	1	2647	10	604565	22.83138	2.92363	178.29632	0.04694	True	0.03776
6VAX-F	2648	LUMBAR PUNCTURE	1363	17	17	2631	1346	603229	2.88361	1.78998	4.64541	0.00015	True	0.64199
6VAX-F	2648	LUMBAR PUNCTURE ABNORMAL	401	4	4	2644	397	604178	2.30039	0.85976	6.15499	0.10012	False	0.15106
6VAX-F	2648	LUMBAR PUNCTURE NORMAL	667	26	26	2622	641	603934	9.26078	6.26855	13.68132	0.00000	True	0.98187
6VAX-F	2648	LUNG CONSOLIDATION	25	1	1	2647	24	604551	9.51308	1.28739	70.29633	0.10350	False	0.03776
6VAX-F	2648	LUNG DISORDER	835	3	3	2645	832	603743	0.82325	0.26514	2.55615	1.00000	False	0.11329
6VAX-F	2648	LUNG INFILTRATION	129	3	3	2645	126	604449	5.43604	1.73098	17.07156	0.01928	True	0.11329
6VAX-F	2648	LYMPH NODE PALPABLE	52	1	1	2647	51	604524	4.47674	0.61887	32.38352	0.20329	False	0.03776
6VAX-F	2648	LYMPHADENITIS	355	3	3	2645	352	604223	1.94586	0.62496	6.05860	0.20303	False	0.11329
6VAX-F	2648	LYMPHADENOPATHY	7759	17	17	2631	7742	596833	0.50133	0.31197	0.80564	0.00226	True	0.64199
6VAX-F	2648	LYMPHANGITIS	180	1	1	2647	179	604396	1.27550	0.17875	9.10143	0.54469	False	0.03776
6VAX-F	2648	LYMPHOCYTE COUNT	62	1	1	2647	61	604514	3.74285	0.51903	26.99033	0.23737	False	0.03776
6VAX-F	2648	LYMPHOCYTE COUNT ABNORMAL	29	1	1	2647	28	604547	8.15407	1.10981	59.91005	0.11904	False	0.03776
6VAX-F	2648	LYMPHOCYTE COUNT DECREASED	169	2	2	2646	167	604408	2.73430	0.67854	11.01828	0.16854	False	0.07553
6VAX-F	2648	LYMPHOCYTE COUNT INCREASED	283	19	19	2629	264	604311	16.43168	10.33177	26.13297	0.00000	True	0.71752
6VAX-F	2648	LYMPHOCYTE COUNT NORMAL	216	4	4	2644	212	604363	4.30781	1.60314	11.57554	0.01537	True	0.15106
6VAX-F	2648	LYMPHOCYTE MORPHOLOGY	1	1	1	2647	0	604575	-100.00000	-100.00000	-100.00000	0.00436	True	0.03776
6VAX-F	2648	LYMPHOCYTE MORPHOLOGY ABNORMAL	80	2	2	2646	78	604497	5.85420	1.43921	23.81285	0.04803	True	0.07553
6VAX-F	2648	LYMPHOCYTE MORPHOLOGY NORMAL	6	1	1	2647	5	604570	45.66276	5.33639	390.72979	0.02588	True	0.03776
6VAX-F	2648	LYMPHOCYTE PERCENTAGE	247	8	8	2640	239	604336	7.64230	3.78205	15.44262	0.00002	True	0.30211
6VAX-F	2648	LYMPHOCYTE PERCENTAGE DECREASED	278	8	8	2640	270	604305	6.76485	3.35222	13.65164	0.00004	True	0.30211
6VAX-F	2648	LYMPHOCYTE PERCENTAGE INCREASED	360	34	34	2614	326	604249	23.81187	16.76044	33.82996	0.00000	True	1.28399
6VAX-F	2648	LYMPHOCYTOSIS	215	1	1	2647	214	604361	1.06689	0.14965	7.60608	0.60929	False	0.03776
6VAX-F	2648	LYMPHOEDEMA	137	1	1	2647	136	604439	1.67878	0.23486	11.99978	0.45053	False	0.03776
6VAX-F	2648	LYMPHOHISTIOCYTOSIS	4	1	1	2647	3	604572	76.10461	7.91863	731.42883	0.01733	True	0.03776
6VAX-F	2648	LYMPHOPENIA	111	1	1	2647	110	604465	2.07558	0.28988	14.86129	0.38440	False	0.03776
6VAX-F	2648	MACROCEPHALY	5	1	1	2647	4	604571	57.07846	6.38156	510.52564	0.02161	True	0.03776
6VAX-F	2648	MACROPHAGE ACTIVATION	3	1	1	2647	2	604573	114.15691	10.35405	1258.61897	0.01303	True	0.03776
6VAX-F	2648	MACROSOMIA	4	1	1	2647	3	604572	76.10461	7.91863	731.42883	0.01733	True	0.03776
6VAX-F	2648	MACULE	105	1	1	2647	104	604471	2.19533	0.30645	15.72671	0.36804	False	0.03776
6VAX-F	2648	MAGNETIC RESONANCE NEUROGRAPHY	5	1	1	2647	4	604571	57.07846	6.38156	510.52564	0.02161	True	0.03776
6VAX-F	2648	MALABSORPTION	38	2	2	2646	36	604539	12.68410	3.05553	52.65412	0.01204	True	0.07553
6VAX-F	2648	MALAISE	15789	58	58	2590	15731	588844	0.84179	0.65232	1.08629	0.19859	False	2.19033
6VAX-F	2648	MASTICATION DISORDER	64	2	2	2646	62	604513	7.36496	1.80245	30.09388	0.03206	True	0.07553
6VAX-F	2648	MASTOCYTOSIS	3	1	1	2647	2	604573	114.15691	10.35405	1258.61897	0.01303	True	0.03776
6VAX-F	2648	MASTOIDITIS	51	4	4	2644	47	604528	19.43096	7.00575	53.89322	0.00008	True	0.15106
6VAX-F	2648	MEAN CELL HAEMOGLOBIN CONCENTRATION DECREASED	46	6	6	2642	40	604535	34.24707	14.53221	80.70776	0.00000	True	0.22659
6VAX-F	2648	MEAN CELL HAEMOGLOBIN CONCENTRATION INCREASED	35	1	1	2647	34	604541	6.71511	0.91953	49.03865	0.14184	False	0.03776
6VAX-F	2648	MEAN CELL HAEMOGLOBIN CONCENTRATION NORMAL	203	9	9	2639	194	604381	10.59188	5.43502	20.64169	0.00000	True	0.33988
6VAX-F	2648	MEAN CELL HAEMOGLOBIN DECREASED	141	10	10	2638	131	604444	17.42854	9.17254	33.11555	0.00000	True	0.37764
6VAX-F	2648	MEAN CELL HAEMOGLOBIN INCREASED	49	3	3	2645	46	604529	14.89003	4.63387	47.84621	0.00131	True	0.11329
6VAX-F	2648	MEAN CELL HAEMOGLOBIN NORMAL	189	9	9	2639	180	604395	11.41569	5.85099	22.27282	0.00000	True	0.33988
6VAX-F	2648	MEAN CELL VOLUME	29	1	1	2647	28	604547	8.15407	1.10981	59.91005	0.11904	False	0.03776
6VAX-F	2648	MEAN CELL VOLUME DECREASED	222	29	29	2619	193	604382	34.30622	23.26260	50.59266	0.00000	True	1.09517
6VAX-F	2648	MEAN CELL VOLUME INCREASED	50	5	5	2643	45	604530	25.36820	10.07778	63.85791	0.00000	True	0.18882
6VAX-F	2648	MEAN CELL VOLUME NORMAL	292	18	18	2630	274	604301	14.99872	9.32394	24.12730	0.00000	True	0.67976
6VAX-F	2648	MEAN PLATELET VOLUME DECREASED	38	2	2	2646	36	604539	12.68410	3.05553	52.65412	0.01204	True	0.07553
6VAX-F	2648	MEAN PLATELET VOLUME INCREASED	32	1	1	2647	31	604544	7.36496	1.00575	53.93232	0.13052	False	0.03776
6VAX-F	2648	MEAN PLATELET VOLUME NORMAL	103	4	4	2644	99	604476	9.22480	3.39744	25.04736	0.00113	True	0.15106
6VAX-F	2648	MEASLES ANTIBODY NEGATIVE	318	1	1	2647	317	604258	0.72023	0.10118	5.12708	1.00000	False	0.03776
6VAX-F	2648	MEASLES ANTIBODY POSITIVE	129	2	2	2646	127	604448	3.59549	0.88994	14.52627	0.10941	False	0.07553
6VAX-F	2648	MEASLES POST VACCINE	109	1	1	2647	108	604467	2.11402	0.29520	15.13898	0.37899	False	0.03776
6VAX-F	2648	MECHANICAL VENTILATION	481	22	22	2626	459	604116	10.94315	7.14669	16.75635	0.00000	True	0.83082
6VAX-F	2648	MEDICATION ERROR	2707	1	1	2647	2706	601869	0.08437	0.01188	0.59899	0.00019	True	0.03776
6VAX-F	2648	MEGAKARYOCYTES ABNORMAL	7	1	1	2647	6	604569	38.05230	4.58259	315.97384	0.03013	True	0.03776
6VAX-F	2648	MEGAKARYOCYTES DECREASED	1	1	1	2647	0	604575	-100.00000	-100.00000	-100.00000	0.00436	True	0.03776
6VAX-F	2648	MELAENA	120	4	4	2644	116	604459	7.87289	2.90782	21.31578	0.00198	True	0.15106
6VAX-F	2648	MEMORY IMPAIRMENT	924	1	1	2647	923	603652	0.24736	0.03482	1.75731	0.20196	False	0.03776
6VAX-F	2648	MENINGEAL DISORDER	30	1	1	2647	29	604546	7.87289	1.07281	57.77560	0.12288	False	0.03776
6VAX-F	2648	MENINGISM	235	6	6	2642	229	604346	5.98202	2.66200	13.44276	0.00064	True	0.22659
6VAX-F	2648	MENINGITIS	1289	18	18	2630	1271	603304	3.23340	2.03372	5.14076	0.00002	True	0.67976
6VAX-F	2648	MENINGITIS ASEPTIC	132	1	1	2647	131	604444	1.74285	0.24376	12.46120	0.43839	False	0.03776
6VAX-F	2648	MENINGITIS BACTERIAL	83	3	3	2645	80	604495	8.56177	2.70556	27.09376	0.00587	True	0.11329
6VAX-F	2648	MENINGITIS HAEMOPHILUS	35	2	2	2646	33	604542	13.83720	3.32198	57.63670	0.01028	True	0.07553
6VAX-F	2648	MENINGITIS PNEUMOCOCCAL	372	12	12	2636	360	604215	7.61046	4.28721	13.50975	0.00000	True	0.45317
6VAX-F	2648	MENINGITIS TUBERCULOUS	3	1	1	2647	2	604573	114.15691	10.35405	1258.61897	0.01303	True	0.03776
6VAX-F	2648	MENINGITIS VIRAL	121	3	3	2645	118	604457	5.80459	1.84667	18.24542	0.01630	True	0.11329
6VAX-F	2648	MENINGOCOCCAL SEPSIS	32	1	1	2647	31	604544	7.36496	1.00575	53.93232	0.13052	False	0.03776
6VAX-F	2648	MENTAL DISORDER	164	2	2	2646	162	604413	2.81869	0.69931	11.36124	0.16087	False	0.07553
6VAX-F	2648	MENTAL IMPAIRMENT	332	2	2	2646	330	604245	1.38372	0.34479	5.55320	0.65918	False	0.07553
6VAX-F	2648	MENTAL RETARDATION	34	5	5	2643	29	604546	39.36445	15.24928	101.61532	0.00000	True	0.18882
6VAX-F	2648	MENTAL RETARDATION SEVERITY UNSPECIFIED	540	1	1	2647	539	604036	0.42359	0.05958	3.01154	0.73630	False	0.03776
6VAX-F	2648	MENTAL STATUS CHANGES	298	1	1	2647	297	604278	0.76873	0.10797	5.47348	1.00000	False	0.03776
6VAX-F	2648	METABOLIC ACIDOSIS	96	4	4	2644	92	604483	9.92669	3.65055	26.99297	0.00087	True	0.15106
6VAX-F	2648	METABOLIC ALKALOSIS	1	1	1	2647	0	604575	-100.00000	-100.00000	-100.00000	0.00436	True	0.03776
6VAX-F	2648	METABOLIC DISORDER	34	3	3	2645	31	604544	22.09489	6.75892	72.22807	0.00045	True	0.11329
6VAX-F	2648	METABOLIC FUNCTION TEST	1151	6	6	2642	1145	603430	1.19640	0.53685	2.66625	0.64888	False	0.22659
6VAX-F	2648	METABOLIC FUNCTION TEST ABNORMAL	37	3	3	2645	34	604541	20.14534	6.19111	65.55114	0.00058	True	0.11329
6VAX-F	2648	METABOLIC FUNCTION TEST NORMAL	723	15	15	2633	708	603867	4.83716	2.90476	8.05508	0.00000	True	0.56647
6VAX-F	2648	METASTASES TO MENINGES	2	1	1	2647	1	604574	228.31382	14.28379	3649.39553	0.00870	True	0.03776
6VAX-F	2648	METHYLMALONIC ACIDURIA	1	1	1	2647	0	604575	-100.00000	-100.00000	-100.00000	0.00436	True	0.03776
6VAX-F	2648	MICROBIOLOGY TEST ABNORMAL	32	4	4	2644	28	604547	32.61626	11.44831	92.92376	0.00001	True	0.15106
6VAX-F	2648	MICROBIOLOGY TEST NORMAL	33	3	3	2645	30	604545	22.83138	6.97206	74.76583	0.00041	True	0.11329
6VAX-F	2648	MICROCEPHALY	25	4	4	2644	21	604554	43.48835	14.93798	126.60590	0.00000	True	0.15106
6VAX-F	2648	MICROCYTIC ANAEMIA	24	2	2	2646	22	604553	20.75580	4.88307	88.22394	0.00492	True	0.07553
6VAX-F	2648	MICROENCEPHALY	1	1	1	2647	0	604575	-100.00000	-100.00000	-100.00000	0.00436	True	0.03776
6VAX-F	2648	MICROSCOPY	58	8	8	2640	50	604525	36.53021	17.33575	76.97715	0.00000	True	0.30211
6VAX-F	2648	MIDDLE INSOMNIA	347	11	11	2637	336	604239	7.47456	4.10482	13.61060	0.00000	True	0.41541
6VAX-F	2648	MILIARIA	32	1	1	2647	31	604544	7.36496	1.00575	53.93232	0.13052	False	0.03776
6VAX-F	2648	MILK ALLERGY	89	2	2	2646	87	604488	5.24859	1.29267	21.31070	0.05803	False	0.07553
6VAX-F	2648	MIOSIS	80	1	1	2647	79	604496	2.89005	0.40223	20.76502	0.29507	False	0.03776
6VAX-F	2648	MITOCHONDRIAL CYTOPATHY	19	2	2	2646	17	604558	26.86045	6.20878	116.20383	0.00309	True	0.07553
6VAX-F	2648	MITRAL VALVE INCOMPETENCE	55	3	3	2645	52	604523	13.17195	4.11618	42.15085	0.00183	True	0.11329
6VAX-F	2648	MIXED RECEPTIVE-EXPRESSIVE LANGUAGE DISORDER	22	1	1	2647	21	604554	10.87209	1.46293	80.79858	0.09167	False	0.03776
6VAX-F	2648	MOANING	250	16	16	2632	234	604341	15.61120	9.42112	25.86843	0.00000	True	0.60423
6VAX-F	2648	MOBILITY DECREASED	4226	9	9	2639	4217	600358	0.48727	0.25364	0.93611	0.02503	True	0.33988
6VAX-F	2648	MOLLUSCUM CONTAGIOSUM	18	1	1	2647	17	604558	13.43022	1.78791	100.88385	0.07565	False	0.03776
6VAX-F	2648	MONOCYTE COUNT	44	1	1	2647	43	604532	5.30962	0.73142	38.54449	0.17494	False	0.03776
6VAX-F	2648	MONOCYTE COUNT INCREASED	233	6	6	2642	227	604348	6.03473	2.68521	13.56244	0.00061	True	0.22659
6VAX-F	2648	MONOCYTE COUNT NORMAL	140	8	8	2640	132	604443	13.83720	6.78509	28.21895	0.00000	True	0.30211
6VAX-F	2648	MONOCYTE PERCENTAGE	248	11	11	2637	237	604338	10.59684	5.79643	19.37282	0.00000	True	0.41541
6VAX-F	2648	MONOCYTE PERCENTAGE DECREASED	31	4	4	2644	27	604548	33.82427	11.84358	96.59925	0.00001	True	0.15106
6VAX-F	2648	MONOCYTE PERCENTAGE INCREASED	242	17	17	2631	225	604350	17.25038	10.55197	28.20094	0.00000	True	0.64199
6VAX-F	2648	MONOCYTOSIS	64	2	2	2646	62	604513	7.36496	1.80245	30.09388	0.03206	True	0.07553
6VAX-F	2648	MONONUCLEOSIS HETEROPHILE TEST NEGATIVE	215	2	2	2646	213	604362	2.14379	0.53295	8.62335	0.24124	False	0.07553
6VAX-F	2648	MONOPARESIS	104	2	2	2646	102	604473	4.47674	1.10513	18.13467	0.07609	False	0.07553
6VAX-F	2648	MOOD ALTERED	329	5	5	2643	324	604251	3.52336	1.45785	8.51532	0.01540	True	0.18882
6VAX-F	2648	MOROSE	4	3	3	2645	1	604574	684.94147	71.26763	6582.85949	0.00000	True	0.11329
6VAX-F	2648	MOTOR DEVELOPMENTAL DELAY	40	9	9	2639	31	604544	66.28466	31.58884	139.08885	0.00000	True	0.33988
6VAX-F	2648	MOTOR DYSFUNCTION	323	5	5	2643	318	604257	3.58984	1.48517	8.67708	0.01434	True	0.18882
6VAX-F	2648	MOVEMENT DISORDER	897	20	20	2628	877	603698	5.20670	3.34797	8.09736	0.00000	True	0.75529
6VAX-F	2648	MUCOSAL DRYNESS	39	1	1	2647	38	604537	6.00826	0.82521	43.74555	0.15671	False	0.03776
6VAX-F	2648	MUCOSAL INFLAMMATION	42	2	2	2646	40	604535	11.41569	2.76032	47.21118	0.01458	True	0.07553
6VAX-F	2648	MUCOUS MEMBRANE DISORDER	134	1	1	2647	133	604442	1.71665	0.24012	12.27244	0.44328	False	0.03776
6VAX-F	2648	MUCOUS STOOLS	521	30	30	2618	491	604084	13.94993	9.66819	20.12792	0.00000	True	1.13293
6VAX-F	2648	MULTI-ORGAN FAILURE	91	1	1	2647	90	604485	2.53682	0.35360	18.19962	0.32816	False	0.03776
6VAX-F	2648	MULTIPLE FRACTURES	2	1	1	2647	1	604574	228.31382	14.28379	3649.39553	0.00870	True	0.03776
6VAX-F	2648	MULTIPLE ORGAN DYSFUNCTION SYNDROME	22	1	1	2647	21	604554	10.87209	1.46293	80.79858	0.09167	False	0.03776
6VAX-F	2648	MUMPS ANTIBODY TEST NEGATIVE	303	2	2	2646	301	604274	1.51704	0.37786	6.09068	0.38099	False	0.07553
6VAX-F	2648	MUMPS ANTIBODY TEST POSITIVE	96	1	1	2647	95	604480	2.40330	0.33518	17.23191	0.34268	False	0.03776
6VAX-F	2648	MUSCLE CONTRACTIONS INVOLUNTARY	322	4	4	2644	318	604257	2.87187	1.07204	7.69345	0.05376	False	0.15106
6VAX-F	2648	MUSCLE DISORDER	290	4	4	2644	286	604289	3.19320	1.19117	8.56012	0.03925	True	0.15106
6VAX-F	2648	MUSCLE RIGIDITY	538	14	14	2634	524	604051	6.09999	3.59260	10.35735	0.00000	True	0.52870
6VAX-F	2648	MUSCLE SPASMS	3431	39	39	2609	3392	601183	2.62507	1.91894	3.59104	0.00000	True	1.47281
6VAX-F	2648	MUSCLE SPASTICITY	80	2	2	2646	78	604497	5.85420	1.43921	23.81285	0.04803	True	0.07553
6VAX-F	2648	MUSCLE TIGHTNESS	566	5	5	2643	561	604014	2.03488	0.84437	4.90398	0.10409	False	0.18882
6VAX-F	2648	MUSCLE TWITCHING	2963	31	31	2617	2932	601643	2.41396	1.69800	3.43180	0.00001	True	1.17069
6VAX-F	2648	MUSCULAR DYSTROPHY	9	3	3	2645	6	604569	114.15691	28.56466	456.22104	0.00001	True	0.11329
6VAX-F	2648	MUSCULAR WEAKNESS	5853	11	11	2637	5842	598733	0.42990	0.23824	0.77575	0.00188	True	0.41541
6VAX-F	2648	MUSCULOSKELETAL DISORDER	228	3	3	2645	225	604350	3.04418	0.97506	9.50406	0.07881	False	0.11329
6VAX-F	2648	MUSCULOSKELETAL STIFFNESS	5523	47	47	2601	5476	599099	1.95960	1.47428	2.60468	0.00003	True	1.77492
6VAX-F	2648	MYALGIA	20054	3	3	2645	20051	584524	0.03416	0.01102	0.10586	0.00000	True	0.11329
6VAX-F	2648	MYCOBACTERIUM TEST NEGATIVE	37	1	1	2647	36	604539	6.34205	0.86982	46.24120	0.14931	False	0.03776
6VAX-F	2648	MYCOPLASMA TEST	116	4	4	2644	112	604463	8.15407	3.00988	22.09016	0.00175	True	0.15106
6VAX-F	2648	MYDRIASIS	502	3	3	2645	499	604076	1.37263	0.44148	4.26776	0.48588	False	0.11329
6VAX-F	2648	MYELITIS	443	1	1	2647	442	604133	0.51655	0.07263	3.67391	1.00000	False	0.03776
6VAX-F	2648	MYOCARDIAL FIBROSIS	9	1	1	2647	8	604567	28.53923	3.57061	228.10887	0.03857	True	0.03776
6VAX-F	2648	MYOCARDIAL INFARCTION	300	1	1	2647	299	604276	0.76359	0.10725	5.43675	1.00000	False	0.03776
6VAX-F	2648	MYOCARDIAL ISCHAEMIA	34	1	1	2647	33	604542	6.91860	0.94658	50.56819	0.13808	False	0.03776
6VAX-F	2648	MYOCLONIC EPILEPSY	63	3	3	2645	60	604515	11.41569	3.58252	36.37610	0.00271	True	0.11329
6VAX-F	2648	MYOCLONUS	367	26	26	2622	341	604234	17.40809	11.70474	25.89051	0.00000	True	0.98187
6VAX-F	2648	MYOGLOBIN BLOOD	18	1	1	2647	17	604558	13.43022	1.78791	100.88385	0.07565	False	0.03776
6VAX-F	2648	MYOGLOBIN BLOOD DECREASED	2	1	1	2647	1	604574	228.31382	14.28379	3649.39553	0.00870	True	0.03776
6VAX-F	2648	MYOSITIS	401	1	1	2647	400	604175	0.57078	0.08023	4.06061	1.00000	False	0.03776
6VAX-F	2648	N-TERMINAL PROHORMONE BRAIN NATRIURETIC PEPTIDE	2	1	1	2647	1	604574	228.31382	14.28379	3649.39553	0.00870	True	0.03776
6VAX-F	2648	NAEVUS FLAMMEUS	3	1	1	2647	2	604573	114.15691	10.35405	1258.61897	0.01303	True	0.03776
6VAX-F	2648	NAIL HYPERTROPHY	1	1	1	2647	0	604575	-100.00000	-100.00000	-100.00000	0.00436	True	0.03776
6VAX-F	2648	NASAL CONGESTION	2434	6	6	2642	2428	602147	0.56420	0.25345	1.25596	0.21345	False	0.22659
6VAX-F	2648	NASAL IRRIGATION	1	1	1	2647	0	604575	-100.00000	-100.00000	-100.00000	0.00436	True	0.03776
6VAX-F	2648	NASAL OBSTRUCTION	17	1	1	2647	16	604559	14.26961	1.89302	107.56480	0.07160	False	0.03776
6VAX-F	2648	NASOPHARYNGITIS	1662	17	17	2631	1645	602930	2.35947	1.46543	3.79898	0.00201	True	0.64199
6VAX-F	2648	NATURAL KILLER CELL COUNT	14	1	1	2647	13	604562	17.56260	2.29824	134.20945	0.05935	False	0.03776
6VAX-F	2648	NAUSEA	26895	5	5	2643	26890	577685	0.04245	0.01768	0.10192	0.00000	True	0.18882
6VAX-F	2648	NECROSIS	154	3	3	2645	151	604424	4.53604	1.44759	14.21373	0.03042	True	0.11329
6VAX-F	2648	NECROTISING COLITIS	17	1	1	2647	16	604559	14.26961	1.89302	107.56480	0.07160	False	0.03776
6VAX-F	2648	NEISSERIA TEST POSITIVE	85	2	2	2646	83	604492	5.50154	1.35394	22.35469	0.05350	False	0.07553
6VAX-F	2648	NEONATAL DISORDER	144	1	1	2647	143	604432	1.59660	0.22344	11.40837	0.46709	False	0.03776
6VAX-F	2648	NEONATAL HYPOXIA	16	1	1	2647	15	604560	15.22092	2.01124	115.19084	0.06754	False	0.03776
6VAX-F	2648	NEONATAL RESPIRATORY DISTRESS SYNDROME	28	3	3	2645	25	604550	27.39766	8.27705	90.68834	0.00025	True	0.11329
6VAX-F	2648	NEPHROPATHY	9	1	1	2647	8	604567	28.53923	3.57061	228.10887	0.03857	True	0.03776
6VAX-F	2648	NERVE CONDUCTION STUDIES	260	1	1	2647	259	604316	0.88152	0.12375	6.27957	1.00000	False	0.03776
6VAX-F	2648	NERVE CONDUCTION STUDIES ABNORMAL	284	1	1	2647	283	604292	0.80676	0.11329	5.74519	1.00000	False	0.03776
6VAX-F	2648	NERVE CONDUCTION STUDIES NORMAL	154	2	2	2646	152	604423	3.00413	0.74490	12.11547	0.14572	False	0.07553
6VAX-F	2648	NERVOUS SYSTEM DISORDER	1271	10	10	2638	1261	603314	1.81058	0.97293	3.36939	0.08073	False	0.37764
6VAX-F	2648	NERVOUSNESS	919	5	5	2643	914	603661	1.24898	0.51904	3.00546	0.60878	False	0.18882
6VAX-F	2648	NEURALGIC AMYOTROPHY	151	1	1	2647	150	604425	1.52209	0.21308	10.87251	0.48315	False	0.03776
6VAX-F	2648	NEURODERMATITIS	46	18	18	2630	28	604547	146.77317	81.28702	265.01602	0.00000	True	0.67976
6VAX-F	2648	NEURODEVELOPMENTAL DISORDER	594	1	1	2647	593	603982	0.38501	0.05416	2.73685	0.53009	False	0.03776
6VAX-F	2648	NEUROGENIC BLADDER	43	1	1	2647	42	604533	5.43604	0.74843	39.48339	0.17133	False	0.03776
6VAX-F	2648	NEUROLOGICAL DECOMPENSATION	29	1	1	2647	28	604547	8.15407	1.10981	59.91005	0.11904	False	0.03776
6VAX-F	2648	NEUROLOGICAL EXAMINATION	323	7	7	2641	316	604259	5.05758	2.39382	10.68548	0.00062	True	0.26435
6VAX-F	2648	NEUROLOGICAL EXAMINATION ABNORMAL	409	23	23	2625	386	604189	13.60419	8.94796	20.68338	0.00000	True	0.86858
6VAX-F	2648	NEUROLOGICAL EXAMINATION NORMAL	776	54	54	2594	722	603853	17.07610	12.98521	22.45581	0.00000	True	2.03927
6VAX-F	2648	NEUROLOGICAL SYMPTOM	450	2	2	2646	448	604127	1.01926	0.25425	4.08601	0.72421	False	0.07553
6VAX-F	2648	NEURON-SPECIFIC ENOLASE	2	1	1	2647	1	604574	228.31382	14.28379	3649.39553	0.00870	True	0.03776
6VAX-F	2648	NEURONE-SPECIFIC ENOLASE	6	1	1	2647	5	604570	45.66276	5.33639	390.72979	0.02588	True	0.03776
6VAX-F	2648	NEUROPSYCHOLOGICAL TEST	23	3	3	2645	20	604555	34.24707	10.18269	115.18199	0.00014	True	0.11329
6VAX-F	2648	NEUROPSYCHOLOGICAL TEST ABNORMAL	17	1	1	2647	16	604559	14.26961	1.89302	107.56480	0.07160	False	0.03776
6VAX-F	2648	NEUTROPENIA	277	18	18	2630	259	604316	15.86737	9.85552	25.54643	0.00000	True	0.67976
6VAX-F	2648	NEUTROPHIL COUNT	121	6	6	2642	115	604460	11.91203	5.24703	27.04320	0.00002	True	0.22659
6VAX-F	2648	NEUTROPHIL COUNT DECREASED	303	18	18	2630	285	604290	14.41982	8.96918	23.18287	0.00000	True	0.67976
6VAX-F	2648	NEUTROPHIL COUNT INCREASED	338	13	13	2635	325	604250	9.13255	5.25295	15.87747	0.00000	True	0.49094
6VAX-F	2648	NEUTROPHIL COUNT NORMAL	184	7	7	2641	177	604398	9.02936	4.24665	19.19852	0.00002	True	0.26435
6VAX-F	2648	NEUTROPHIL MORPHOLOGY NORMAL	1	1	1	2647	0	604575	-100.00000	-100.00000	-100.00000	0.00436	True	0.03776
6VAX-F	2648	NEUTROPHIL PERCENTAGE	211	8	8	2640	203	604372	8.99759	4.44376	18.21803	0.00001	True	0.30211
6VAX-F	2648	NEUTROPHIL PERCENTAGE DECREASED	411	35	35	2613	376	604199	21.25262	15.06257	29.98650	0.00000	True	1.32175
6VAX-F	2648	NEUTROPHIL PERCENTAGE INCREASED	345	4	4	2644	341	604234	2.67817	1.00014	7.17157	0.06574	False	0.15106
6VAX-F	2648	NIGHT SWEATS	734	1	1	2647	733	603842	0.31148	0.04383	2.21342	0.38943	False	0.03776
6VAX-F	2648	NIGHTMARE	122	1	1	2647	121	604454	1.88689	0.26374	13.49937	0.41330	False	0.03776
6VAX-F	2648	NITRITE URINE ABSENT	71	1	1	2647	70	604505	3.26163	0.45323	23.47197	0.26678	False	0.03776
6VAX-F	2648	NITRITE URINE PRESENT	20	1	1	2647	19	604556	12.01652	1.60918	89.73289	0.08370	False	0.03776
6VAX-F	2648	NO ADVERSE EVENT	49830	8	8	2640	49822	554753	0.03666	0.01835	0.07324	0.00000	True	0.30211
6VAX-F	2648	NO REACTION ON PREVIOUS EXPOSURE TO DRUG	1178	9	9	2639	1169	603406	1.75776	0.91330	3.38304	0.11243	False	0.33988
6VAX-F	2648	NO THERAPEUTIC RESPONSE	513	1	1	2647	512	604063	0.44593	0.06272	3.17066	0.73223	False	0.03776
6VAX-F	2648	NODULE	803	1	1	2647	802	603773	0.28468	0.04007	2.02276	0.27701	False	0.03776
6VAX-F	2648	NONSPECIFIC REACTION	179	1	1	2647	178	604397	1.28266	0.17975	9.15284	0.54270	False	0.03776
6VAX-F	2648	NORMOCHROMIC NORMOCYTIC ANAEMIA	33	3	3	2645	30	604545	22.83138	6.97206	74.76583	0.00041	True	0.11329
6VAX-F	2648	NOROVIRUS TEST POSITIVE	23	3	3	2645	20	604555	34.24707	10.18269	115.18199	0.00014	True	0.11329
6VAX-F	2648	NUCHAL RIGIDITY	817	2	2	2646	815	603760	0.56028	0.13996	2.24293	0.59481	False	0.07553
6VAX-F	2648	NUCLEAR MAGNETIC RESONANCE IMAGING	2274	7	7	2641	2267	602308	0.70498	0.33603	1.47903	0.42655	False	0.26435
6VAX-F	2648	NUCLEAR MAGNETIC RESONANCE IMAGING ABNORMAL	1365	22	22	2626	1343	603232	3.74006	2.45850	5.68967	0.00000	True	0.83082
6VAX-F	2648	NUCLEAR MAGNETIC RESONANCE IMAGING BRAIN	510	7	7	2641	503	604072	3.17733	1.50843	6.69266	0.00771	True	0.26435
6VAX-F	2648	NUCLEAR MAGNETIC RESONANCE IMAGING BRAIN ABNORMAL	897	24	24	2624	873	603702	6.27667	4.19165	9.39882	0.00000	True	0.90634
6VAX-F	2648	NUCLEAR MAGNETIC RESONANCE IMAGING BRAIN NORMAL	1030	29	29	2619	1001	603574	6.61449	4.58158	9.54942	0.00000	True	1.09517
6VAX-F	2648	NUCLEAR MAGNETIC RESONANCE IMAGING NORMAL	1737	27	27	2621	1710	602865	3.60496	2.46961	5.26224	0.00000	True	1.01964
6VAX-F	2648	NUTRITIONAL CONDITION ABNORMAL	4	1	1	2647	3	604572	76.10461	7.91863	731.42883	0.01733	True	0.03776
6VAX-F	2648	NYSTAGMUS	322	11	11	2637	311	604264	8.07541	4.43139	14.71597	0.00000	True	0.41541
6VAX-F	2648	OBSESSIVE-COMPULSIVE SYMPTOM	2	1	1	2647	1	604574	228.31382	14.28379	3649.39553	0.00870	True	0.03776
6VAX-F	2648	OBSESSIVE THOUGHTS	8	1	1	2647	7	604568	32.61626	4.01417	265.01630	0.03436	True	0.03776
6VAX-F	2648	OBSTRUCTIVE AIRWAYS DISORDER	77	4	4	2644	73	604502	12.51035	4.57583	34.20334	0.00038	True	0.15106
6VAX-F	2648	OCCULT BLOOD	58	2	2	2646	56	604519	8.15407	1.99087	33.39683	0.02674	True	0.07553
6VAX-F	2648	OCCULT BLOOD NEGATIVE	88	1	1	2647	87	604488	2.62430	0.36566	18.83422	0.31929	False	0.03776
6VAX-F	2648	OCCULT BLOOD POSITIVE	253	6	6	2642	247	604328	5.54608	2.46987	12.45372	0.00094	True	0.22659
6VAX-F	2648	OCULAR HYPERAEMIA	2019	2	2	2646	2017	602558	0.22639	0.05661	0.90537	0.01601	True	0.07553
6VAX-F	2648	OCULAR ICTERUS	53	1	1	2647	52	604523	4.39065	0.60719	31.74914	0.20677	False	0.03776
6VAX-F	2648	OCULOGYRIC CRISIS	22	5	5	2643	17	604558	67.15112	24.79228	181.88214	0.00000	True	0.18882
6VAX-F	2648	OEDEMA	7481	14	14	2634	7467	597108	0.42807	0.25375	0.72214	0.00038	True	0.52870
6VAX-F	2648	OEDEMA MOUTH	257	1	1	2647	256	604319	0.89185	0.12519	6.35344	1.00000	False	0.03776
6VAX-F	2648	OEDEMA PERIPHERAL	15435	35	35	2613	15400	589175	0.51890	0.37324	0.72139	0.00002	True	1.32175
6VAX-F	2648	OESOPHAGEAL PH	8	2	2	2646	6	604569	76.10461	15.36713	376.90260	0.00052	True	0.07553
6VAX-F	2648	OESOPHAGOGASTRODUODENOSCOPY	24	1	1	2647	23	604552	9.92669	1.34103	73.48037	0.09958	False	0.03776
6VAX-F	2648	OESOPHAGOGASTROSCOPY NORMAL	1	1	1	2647	0	604575	-100.00000	-100.00000	-100.00000	0.00436	True	0.03776
6VAX-F	2648	OLIGODIPSIA	11	1	1	2647	10	604565	22.83138	2.92363	178.29632	0.04694	True	0.03776
6VAX-F	2648	OLIGURIA	98	2	2	2646	96	604479	4.75654	1.17322	19.28430	0.06867	False	0.07553
6VAX-F	2648	OPHTHALMOLOGICAL EXAMINATION	105	2	2	2646	103	604472	4.43328	1.09455	17.95626	0.07736	False	0.07553
6VAX-F	2648	OPHTHALMOLOGICAL EXAMINATION ABNORMAL	148	12	12	2636	136	604439	20.14534	11.17826	36.30570	0.00000	True	0.45317
6VAX-F	2648	OPHTHALMOLOGICAL EXAMINATION NORMAL	163	17	17	2631	146	604429	26.58449	16.11091	43.86685	0.00000	True	0.64199
6VAX-F	2648	OPISTHOTONUS	482	22	22	2626	460	604115	10.91936	7.13131	16.71957	0.00000	True	0.83082
6VAX-F	2648	OPPOSITIONAL DEFIANT DISORDER	13	1	1	2647	12	604563	19.02615	2.47475	146.27523	0.05523	False	0.03776
6VAX-F	2648	OPTICOKINETIC NYSTAGMUS TESTS ABNORMAL	2	1	1	2647	1	604574	228.31382	14.28379	3649.39553	0.00870	True	0.03776
6VAX-F	2648	ORAL ADMINISTRATION COMPLICATION	126	1	1	2647	125	604450	1.82651	0.25537	13.06401	0.42347	False	0.03776
6VAX-F	2648	ORAL CANDIDIASIS	110	6	6	2642	104	604471	13.17195	5.78953	29.96795	0.00001	True	0.22659
6VAX-F	2648	ORAL DISORDER	97	3	3	2645	94	604481	7.28661	2.30978	22.98696	0.00901	True	0.11329
6VAX-F	2648	ORAL INTAKE REDUCED	520	3	3	2645	517	604058	1.32484	0.42615	4.11868	0.49849	False	0.11329
6VAX-F	2648	ORAL MUCOSAL BLISTERING	160	1	1	2647	159	604416	1.43594	0.20110	10.25331	0.50309	False	0.03776
6VAX-F	2648	ORAL MUCOSAL DISCOLOURATION	7	1	1	2647	6	604569	38.05230	4.58259	315.97384	0.03013	True	0.03776
6VAX-F	2648	ORAL MUCOSAL ERYTHEMA	33	1	1	2647	32	604543	7.13481	0.97527	52.19614	0.13431	False	0.03776
6VAX-F	2648	ORGANIC ACID ANALYSIS	8	1	1	2647	7	604568	32.61626	4.01417	265.01630	0.03436	True	0.03776
6VAX-F	2648	OROPHARYNGEAL PAIN	4301	1	1	2647	4300	600275	0.05310	0.00748	0.37689	0.00000	True	0.03776
6VAX-F	2648	ORTHOPEDIC EXAMINATION	2	1	1	2647	1	604574	228.31382	14.28379	3649.39553	0.00870	True	0.03776
6VAX-F	2648	ORTHOSTATIC INTOLERANCE	130	1	1	2647	129	604446	1.76987	0.24751	12.65586	0.43346	False	0.03776
6VAX-F	2648	OSTEOMYELITIS	110	1	1	2647	109	604466	2.09462	0.29252	14.99885	0.38170	False	0.03776
6VAX-F	2648	OSTEOPOROSIS	55	1	1	2647	54	604521	4.22803	0.58511	30.55211	0.21367	False	0.03776
6VAX-F	2648	OTITIS EXTERNA BACTERIAL	1	1	1	2647	0	604575	-100.00000	-100.00000	-100.00000	0.00436	True	0.03776
6VAX-F	2648	OTITIS MEDIA	2435	13	13	2635	2422	602153	1.22547	0.71148	2.11076	0.43822	False	0.49094
6VAX-F	2648	OTITIS MEDIA ACUTE	90	4	4	2644	86	604489	10.61925	3.89956	28.91825	0.00068	True	0.15106
6VAX-F	2648	OTOACOUSTIC EMISSIONS TEST	3	1	1	2647	2	604573	114.15691	10.35405	1258.61897	0.01303	True	0.03776
6VAX-F	2648	OTORRHOEA	48	2	2	2646	46	604529	9.92669	2.41091	40.87219	0.01878	True	0.07553
6VAX-F	2648	OTOSCOPY NORMAL	16	2	2	2646	14	604561	32.61626	7.41631	143.44330	0.00219	True	0.07553
6VAX-F	2648	OVERDOSE	253	2	2	2646	251	604324	1.81923	0.45271	7.31065	0.30227	False	0.07553
6VAX-F	2648	OXYGEN CONSUMPTION INCREASED	2	1	1	2647	1	604574	228.31382	14.28379	3649.39553	0.00870	True	0.03776
6VAX-F	2648	OXYGEN SATURATION	147	3	3	2645	144	604431	4.75654	1.51714	14.91274	0.02702	True	0.11329
6VAX-F	2648	OXYGEN SATURATION ABNORMAL	21	1	1	2647	20	604555	11.41569	1.53257	85.03206	0.08769	False	0.03776
6VAX-F	2648	OXYGEN SATURATION DECREASED	528	50	50	2598	478	604097	23.88220	17.89144	31.87890	0.00000	True	1.88822
6VAX-F	2648	OXYGEN SATURATION NORMAL	277	12	12	2636	265	604310	10.33874	5.80481	18.41396	0.00000	True	0.45317
6VAX-F	2648	OXYGEN SUPPLEMENTATION	188	3	3	2645	185	604390	3.70239	1.18397	11.57773	0.04991	True	0.11329
6VAX-F	2648	PACKED RED BLOOD CELL TRANSFUSION	46	3	3	2645	43	604532	15.92887	4.94482	51.31209	0.00109	True	0.11329
6VAX-F	2648	PAIN	43628	60	60	2588	43568	561007	0.31442	0.24480	0.40386	0.00000	True	2.26586
6VAX-F	2648	PAIN IN EXTREMITY	22454	18	18	2630	22436	582139	0.18317	0.11557	0.29033	0.00000	True	0.67976
6VAX-F	2648	PAIN OF SKIN	389	2	2	2646	387	604188	1.17992	0.29419	4.73236	0.68874	False	0.07553
6VAX-F	2648	PALLOR	12069	355	355	2293	11714	592861	6.91919	6.27046	7.63504	0.00000	True	13.40634
6VAX-F	2648	PALMAR-PLANTAR ERYTHRODYSAESTHESIA SYNDROME	25	1	1	2647	24	604551	9.51308	1.28739	70.29633	0.10350	False	0.03776
6VAX-F	2648	PALPITATIONS	2528	1	1	2647	2527	602048	0.09035	0.01273	0.64143	0.00038	True	0.03776
6VAX-F	2648	PANCREATITIS	172	1	1	2647	171	604404	1.33517	0.18707	9.52966	0.52849	False	0.03776
6VAX-F	2648	PANCREATITIS ACUTE	38	1	1	2647	37	604538	6.17064	0.84693	44.95879	0.15302	False	0.03776
6VAX-F	2648	PANCYTOPENIA	117	1	1	2647	116	604459	1.96822	0.27502	14.08613	0.40033	False	0.03776
6VAX-F	2648	PANIC REACTION	143	1	1	2647	142	604433	1.60784	0.22501	11.48926	0.46476	False	0.03776
6VAX-F	2648	PANNICULITIS	33	1	1	2647	32	604543	7.13481	0.97527	52.19614	0.13431	False	0.03776
6VAX-F	2648	PAPULE	410	3	3	2645	407	604168	1.68290	0.54085	5.23647	0.26601	False	0.11329
6VAX-F	2648	PARACENTESIS	5	1	1	2647	4	604571	57.07846	6.38156	510.52564	0.02161	True	0.03776
6VAX-F	2648	PARAESTHESIA	13320	3	3	2645	13317	591258	0.05143	0.01660	0.15939	0.00000	True	0.11329
6VAX-F	2648	PARAKERATOSIS	11	1	1	2647	10	604565	22.83138	2.92363	178.29632	0.04694	True	0.03776
6VAX-F	2648	PARALYSIS	1572	2	2	2646	1570	603005	0.29085	0.07271	1.16337	0.07911	False	0.07553
6VAX-F	2648	PARALYSIS FLACCID	117	1	1	2647	116	604459	1.96822	0.27502	14.08613	0.40033	False	0.03776
6VAX-F	2648	PARASITE STOOL TEST	13	1	1	2647	12	604563	19.02615	2.47475	146.27523	0.05523	False	0.03776
6VAX-F	2648	PARASITE STOOL TEST NEGATIVE	68	4	4	2644	64	604511	14.26961	5.20018	39.15671	0.00024	True	0.15106
6VAX-F	2648	PARASITIC BLOOD TEST NEGATIVE	20	1	1	2647	19	604556	12.01652	1.60918	89.73289	0.08370	False	0.03776
6VAX-F	2648	PARENTERAL NUTRITION	22	1	1	2647	21	604554	10.87209	1.46293	80.79858	0.09167	False	0.03776
6VAX-F	2648	PARIETAL CELL ANTIBODY NEGATIVE	1	1	1	2647	0	604575	-100.00000	-100.00000	-100.00000	0.00436	True	0.03776
6VAX-F	2648	PARTIAL SEIZURES	157	13	13	2635	144	604431	20.61166	11.69929	36.31337	0.00000	True	0.49094
6VAX-F	2648	PARVOVIRUS B19 SEROLOGY NEGATIVE	33	1	1	2647	32	604543	7.13481	0.97527	52.19614	0.13431	False	0.03776
6VAX-F	2648	PARVOVIRUS B19 TEST NEGATIVE	87	10	10	2638	77	604498	29.65115	15.36024	57.23808	0.00000	True	0.37764
6VAX-F	2648	PARVOVIRUS B19 TEST POSITIVE	33	3	3	2645	30	604545	22.83138	6.97206	74.76583	0.00041	True	0.11329
6VAX-F	2648	PARVOVIRUS INFECTION	13	2	2	2646	11	604564	41.51160	9.20542	187.19547	0.00144	True	0.07553
6VAX-F	2648	PATENT DUCTUS ARTERIOSUS	16	1	1	2647	15	604560	15.22092	2.01124	115.19084	0.06754	False	0.03776
6VAX-F	2648	PATHOGEN RESISTANCE	8	1	1	2647	7	604568	32.61626	4.01417	265.01630	0.03436	True	0.03776
6VAX-F	2648	PATHOLOGY TEST	96	2	2	2646	94	604481	4.85774	1.19781	19.70060	0.06625	False	0.07553
6VAX-F	2648	PCO2	11	1	1	2647	10	604565	22.83138	2.92363	178.29632	0.04694	True	0.03776
6VAX-F	2648	PCO2 DECREASED	43	8	8	2640	35	604540	52.18602	24.23203	112.38764	0.00000	True	0.30211
6VAX-F	2648	PCO2 INCREASED	41	5	5	2643	36	604539	31.71025	12.45333	80.74466	0.00000	True	0.18882
6VAX-F	2648	PCO2 NORMAL	60	10	10	2638	50	604525	45.66276	23.18239	89.94274	0.00000	True	0.37764
6VAX-F	2648	PEAU D'ORANGE	10	1	1	2647	9	604566	25.36820	3.21500	200.16965	0.04276	True	0.03776
6VAX-F	2648	PEMPHIGOID	67	5	5	2643	62	604513	18.41240	7.40849	45.76055	0.00001	True	0.18882
6VAX-F	2648	PENILE HAEMORRHAGE	2	1	1	2647	1	604574	228.31382	14.28379	3649.39553	0.00870	True	0.03776
6VAX-F	2648	PERICARDIAL DRAINAGE	11	1	1	2647	10	604565	22.83138	2.92363	178.29632	0.04694	True	0.03776
6VAX-F	2648	PERICARDIAL EFFUSION	157	2	2	2646	155	604420	2.94598	0.73061	11.87889	0.15023	False	0.07553
6VAX-F	2648	PERICARDITIS	403	1	1	2647	402	604173	0.56794	0.07983	4.04036	1.00000	False	0.03776
6VAX-F	2648	PERIORBITAL HAEMORRHAGE	2	1	1	2647	1	604574	228.31382	14.28379	3649.39553	0.00870	True	0.03776
6VAX-F	2648	PERIORBITAL OEDEMA	189	2	2	2646	187	604388	2.44186	0.60651	9.83117	0.19978	False	0.07553
6VAX-F	2648	PERIPHERAL CIRCULATORY FAILURE	10	1	1	2647	9	604566	25.36820	3.21500	200.16965	0.04276	True	0.03776
6VAX-F	2648	PERIPHERAL COLDNESS	766	21	21	2627	745	603830	6.43569	4.17807	9.91322	0.00000	True	0.79305
6VAX-F	2648	PERIPHERAL SWELLING	3696	9	9	2639	3687	600888	0.55732	0.29007	1.07079	0.07858	False	0.33988
6VAX-F	2648	PERIPHERAL VASCULAR DISORDER	297	4	4	2644	293	604282	3.11691	1.16290	8.35425	0.04220	True	0.15106
6VAX-F	2648	PERITONEAL DISORDER	4	2	2	2646	2	604573	228.31382	32.17188	1620.27205	0.00011	True	0.07553
6VAX-F	2648	PERITONITIS	38	1	1	2647	37	604538	6.17064	0.84693	44.95879	0.15302	False	0.03776
6VAX-F	2648	PERSONALITY CHANGE	171	3	3	2645	168	604407	4.07703	1.30257	12.76104	0.03955	True	0.11329
6VAX-F	2648	PERTUSSIS	799	18	18	2630	781	603794	5.26203	3.30293	8.38317	0.00000	True	0.67976
6VAX-F	2648	PETECHIAE	1983	79	79	2569	1904	602671	9.47310	7.58879	11.82530	0.00000	True	2.98338
6VAX-F	2648	PETIT MAL EPILEPSY	258	14	14	2634	244	604331	13.09997	7.65466	22.41894	0.00000	True	0.52870
6VAX-F	2648	PH BODY FLUID	10	1	1	2647	9	604566	25.36820	3.21500	200.16965	0.04276	True	0.03776
6VAX-F	2648	PH BODY FLUID ABNORMAL	1	1	1	2647	0	604575	-100.00000	-100.00000	-100.00000	0.00436	True	0.03776
6VAX-F	2648	PH BODY FLUID DECREASED	9	3	3	2645	6	604569	114.15691	28.56466	456.22104	0.00001	True	0.11329
6VAX-F	2648	PH BODY FLUID INCREASED	6	2	2	2646	4	604571	114.15691	20.91765	623.00493	0.00028	True	0.07553
6VAX-F	2648	PH BODY FLUID NORMAL	18	5	5	2643	13	604562	87.81301	31.32749	246.14561	0.00000	True	0.18882
6VAX-F	2648	PH URINE NORMAL	101	8	8	2640	93	604482	19.63990	9.54882	40.39509	0.00000	True	0.30211
6VAX-F	2648	PHARYNGEAL DISORDER	43	1	1	2647	42	604533	5.43604	0.74843	39.48339	0.17133	False	0.03776
6VAX-F	2648	PHARYNGEAL ERYTHEMA	412	26	26	2622	386	604189	15.37865	10.35735	22.83430	0.00000	True	0.98187
6VAX-F	2648	PHARYNGEAL OEDEMA	1823	1	1	2647	1822	602753	0.12531	0.01765	0.88976	0.00646	True	0.03776
6VAX-F	2648	PHARYNGITIS	4057	10	10	2638	4047	600528	0.56416	0.30367	1.04809	0.07149	False	0.37764
6VAX-F	2648	PHARYNGITIS STREPTOCOCCAL	123	1	1	2647	122	604453	1.87142	0.26160	13.38783	0.41586	False	0.03776
6VAX-F	2648	PHENYLALANINE SCREEN	1	1	1	2647	0	604575	-100.00000	-100.00000	-100.00000	0.00436	True	0.03776
6VAX-F	2648	PHENYLALANINE SCREEN NEGATIVE	2	2	2	2646	0	604575	-100.00000	-100.00000	-100.00000	0.00002	True	0.07553
6VAX-F	2648	PHENYLALANINE SCREEN POSITIVE	2	1	1	2647	1	604574	228.31382	14.28379	3649.39553	0.00870	True	0.03776
6VAX-F	2648	PHOTOPHOBIA	1309	2	2	2646	1307	603268	0.34937	0.08733	1.39772	0.14034	False	0.07553
6VAX-F	2648	PHYSICAL EXAMINATION	50	2	2	2646	48	604527	9.51308	2.31330	39.12103	0.02028	True	0.07553
6VAX-F	2648	PHYSICAL EXAMINATION ABNORMAL	19	1	1	2647	18	604557	12.68410	1.69385	94.98282	0.07968	False	0.03776
6VAX-F	2648	PHYSICAL EXAMINATION NORMAL	30	1	1	2647	29	604546	7.87289	1.07281	57.77560	0.12288	False	0.03776
6VAX-F	2648	PLAGIOCEPHALY	9	4	4	2644	5	604570	182.65106	49.07373	679.82219	0.00000	True	0.15106
6VAX-F	2648	PLASMA PROTEIN METABOLISM DISORDER	1	1	1	2647	0	604575	-100.00000	-100.00000	-100.00000	0.00436	True	0.03776
6VAX-F	2648	PLATELET-LARGE CELL RATIO	13	1	1	2647	12	604563	19.02615	2.47475	146.27523	0.05523	False	0.03776
6VAX-F	2648	PLATELET COUNT	139	2	2	2646	137	604438	3.33305	0.82564	13.45532	0.12363	False	0.07553
6VAX-F	2648	PLATELET COUNT DECREASED	1616	43	43	2605	1573	603002	6.24126	4.62114	8.42937	0.00000	True	1.62387
6VAX-F	2648	PLATELET COUNT INCREASED	587	63	63	2585	524	604051	27.44994	21.19588	35.54934	0.00000	True	2.37915
6VAX-F	2648	PLATELET COUNT NORMAL	989	62	62	2586	927	603648	15.27018	11.84187	19.69101	0.00000	True	2.34139
6VAX-F	2648	PLATELET DISORDER	93	3	3	2645	90	604485	7.61046	2.41053	24.02758	0.00803	True	0.11329
6VAX-F	2648	PLATELET DISTRIBUTION WIDTH	39	5	5	2643	34	604541	33.57556	13.14176	85.78141	0.00000	True	0.18882
6VAX-F	2648	PLATELET FUNCTION TEST NORMAL	3	2	2	2646	1	604574	456.62764	41.41619	5034.47587	0.00006	True	0.07553
6VAX-F	2648	PLATELET MORPHOLOGY NORMAL	7	1	1	2647	6	604569	38.05230	4.58259	315.97384	0.03013	True	0.03776
6VAX-F	2648	PLATELETCRIT	9	2	2	2646	7	604568	65.23252	13.55731	313.87366	0.00067	True	0.07553
6VAX-F	2648	PLEOCYTOSIS	141	2	2	2646	139	604436	3.28509	0.81388	13.25980	0.12653	False	0.07553
6VAX-F	2648	PLEURAL EFFUSION	315	1	1	2647	314	604261	0.72711	0.10214	5.17622	1.00000	False	0.03776
6VAX-F	2648	PNEUMATOSIS INTESTINALIS	5	1	1	2647	4	604571	57.07846	6.38156	510.52564	0.02161	True	0.03776
6VAX-F	2648	PNEUMOCOCCAL BACTERAEMIA	439	1	1	2647	438	604137	0.52126	0.07329	3.70753	1.00000	False	0.03776
6VAX-F	2648	PNEUMOCOCCAL INFECTION	208	3	3	2645	205	604370	3.34118	1.06941	10.43891	0.06360	False	0.11329
6VAX-F	2648	PNEUMOCOCCAL SEPSIS	88	4	4	2644	84	604491	10.87209	3.99029	29.62250	0.00063	True	0.15106
6VAX-F	2648	PNEUMONIA	3310	20	20	2628	3290	601285	1.38793	0.89572	2.15061	0.14379	False	0.75529
6VAX-F	2648	PNEUMONIA PNEUMOCOCCAL	251	1	1	2647	250	604325	0.91326	0.12818	6.50652	1.00000	False	0.03776
6VAX-F	2648	PNEUMONIA RESPIRATORY SYNCYTIAL VIRAL	6	2	2	2646	4	604571	114.15691	20.91765	623.00493	0.00028	True	0.07553
6VAX-F	2648	PNEUMONITIS	79	2	2	2646	77	604498	5.93023	1.45757	24.12761	0.04696	True	0.07553
6VAX-F	2648	PO2	12	1	1	2647	11	604564	20.75580	2.68057	160.71348	0.05109	False	0.03776
6VAX-F	2648	PO2 DECREASED	66	7	7	2641	59	604516	27.08808	12.38516	59.24543	0.00000	True	0.26435
6VAX-F	2648	PO2 NORMAL	13	1	1	2647	12	604563	19.02615	2.47475	146.27523	0.05523	False	0.03776
6VAX-F	2648	POLIOMYELITIS POST VACCINE	7	1	1	2647	6	604569	38.05230	4.58259	315.97384	0.03013	True	0.03776
6VAX-F	2648	POLLAKIURIA	416	1	1	2647	415	604160	0.55015	0.07734	3.91350	1.00000	False	0.03776
6VAX-F	2648	POLYCHROMASIA	9	2	2	2646	7	604568	65.23252	13.55731	313.87366	0.00067	True	0.07553
6VAX-F	2648	POLYCYTHAEMIA	9	2	2	2646	7	604568	65.23252	13.55731	313.87366	0.00067	True	0.07553
6VAX-F	2648	POLYDIPSIA	94	3	3	2645	91	604484	7.52683	2.38452	23.75869	0.00827	True	0.11329
6VAX-F	2648	POLYMERASE CHAIN REACTION	1344	37	37	2611	1307	603268	6.46336	4.67223	8.94114	0.00000	True	1.39728
6VAX-F	2648	POLYMERASE CHAIN REACTION POSITIVE	230	3	3	2645	227	604348	3.01736	0.96654	9.41970	0.08042	False	0.11329
6VAX-F	2648	POLYMICROGYRIA	1	1	1	2647	0	604575	-100.00000	-100.00000	-100.00000	0.00436	True	0.03776
6VAX-F	2648	POLYURIA	135	2	2	2646	133	604442	3.43329	0.85021	13.86418	0.11789	False	0.07553
6VAX-F	2648	POOR FEEDING INFANT	40	4	4	2644	36	604539	25.36820	9.03577	71.22200	0.00003	True	0.15106
6VAX-F	2648	POOR QUALITY SLEEP	463	8	8	2640	455	604120	4.01431	1.99746	8.06757	0.00112	True	0.30211
6VAX-F	2648	POOR SUCKING REFLEX	62	9	9	2639	53	604522	38.77027	19.14525	78.51212	0.00000	True	0.33988
6VAX-F	2648	POOR WEIGHT GAIN NEONATAL	3	1	1	2647	2	604573	114.15691	10.35405	1258.61897	0.01303	True	0.03776
6VAX-F	2648	POSITRON EMISSION TOMOGRAM ABNORMAL	35	1	1	2647	34	604541	6.71511	0.91953	49.03865	0.14184	False	0.03776
6VAX-F	2648	POST VACCINATION SYNDROME	163	2	2	2646	161	604414	2.83620	0.70361	11.43241	0.15934	False	0.07553
6VAX-F	2648	POSTICTAL STATE	316	4	4	2644	312	604263	2.92710	1.09252	7.84232	0.05084	False	0.15106
6VAX-F	2648	POSTURE ABNORMAL	657	38	38	2610	619	603956	14.01603	10.12356	19.40515	0.00000	True	1.43505
6VAX-F	2648	POSTURING	111	3	3	2645	108	604467	6.34205	2.01501	19.96104	0.01296	True	0.11329
6VAX-F	2648	PRERENAL FAILURE	4	1	1	2647	3	604572	76.10461	7.91863	731.42883	0.01733	True	0.03776
6VAX-F	2648	PRESYNCOPE	1699	13	13	2635	1686	602889	1.76043	1.02142	3.03411	0.06026	False	0.49094
6VAX-F	2648	PROCALCITONIN	64	4	4	2644	60	604515	15.22092	5.53588	41.84994	0.00019	True	0.15106
6VAX-F	2648	PROCALCITONIN INCREASED	70	12	12	2636	58	604517	47.23734	25.40061	87.84698	0.00000	True	0.45317
6VAX-F	2648	PROCALCITONIN NORMAL	6	1	1	2647	5	604570	45.66276	5.33639	390.72979	0.02588	True	0.03776
6VAX-F	2648	PROCEDURAL COMPLICATION	4	1	1	2647	3	604572	76.10461	7.91863	731.42883	0.01733	True	0.03776
6VAX-F	2648	PRODUCT PREPARATION ERROR	233	2	2	2646	231	604344	1.97674	0.49167	7.94739	0.27017	False	0.07553
6VAX-F	2648	PRODUCT QUALITY ISSUE	518	1	1	2647	517	604058	0.44161	0.06211	3.13993	0.73288	False	0.03776
6VAX-F	2648	PRODUCTIVE COUGH	630	3	3	2645	627	603948	1.09241	0.35159	3.39416	0.75775	False	0.11329
6VAX-F	2648	PROGESTERONE	7	1	1	2647	6	604569	38.05230	4.58259	315.97384	0.03013	True	0.03776
6VAX-F	2648	PROLYMPHOCYTIC LEUKAEMIA	1	1	1	2647	0	604575	-100.00000	-100.00000	-100.00000	0.00436	True	0.03776
6VAX-F	2648	PROTEIN S	2	1	1	2647	1	604574	228.31382	14.28379	3649.39553	0.00870	True	0.03776
6VAX-F	2648	PROTEIN TOTAL	49	2	2	2646	47	604528	9.71548	2.36110	39.97746	0.01952	True	0.07553
6VAX-F	2648	PROTEIN TOTAL DECREASED	132	9	9	2639	123	604452	16.70589	8.49965	32.83509	0.00000	True	0.33988
6VAX-F	2648	PROTEIN TOTAL INCREASED	82	4	4	2644	78	604497	11.70840	4.28970	31.95713	0.00048	True	0.15106
6VAX-F	2648	PROTEIN TOTAL NORMAL	216	11	11	2637	205	604370	12.25099	6.68722	22.44380	0.00000	True	0.41541
6VAX-F	2648	PROTEIN URINE PRESENT	188	6	6	2642	182	604393	7.52683	3.34050	16.95948	0.00020	True	0.22659
6VAX-F	2648	PROTEUS TEST POSITIVE	2	1	1	2647	1	604574	228.31382	14.28379	3649.39553	0.00870	True	0.03776
6VAX-F	2648	PROTHROMBIN LEVEL	8	1	1	2647	7	604568	32.61626	4.01417	265.01630	0.03436	True	0.03776
6VAX-F	2648	PROTHROMBIN LEVEL DECREASED	22	1	1	2647	21	604554	10.87209	1.46293	80.79858	0.09167	False	0.03776
6VAX-F	2648	PROTHROMBIN LEVEL NORMAL	26	2	2	2646	24	604551	19.02615	4.49875	80.46564	0.00576	True	0.07553
6VAX-F	2648	PROTHROMBIN TIME	98	5	5	2643	93	604482	12.27494	4.99569	30.16078	0.00008	True	0.18882
6VAX-F	2648	PROTHROMBIN TIME NORMAL	133	8	8	2640	125	604450	14.61208	7.15687	29.83328	0.00000	True	0.30211
6VAX-F	2648	PROTHROMBIN TIME PROLONGED	126	6	6	2642	120	604455	11.41569	5.03267	25.89440	0.00002	True	0.22659
6VAX-F	2648	PROTHROMBIN TIME SHORTENED	38	5	5	2643	33	604542	34.59300	13.51533	88.54214	0.00000	True	0.18882
6VAX-F	2648	PROTRUSION TONGUE	23	3	3	2645	20	604555	34.24707	10.18269	115.18199	0.00014	True	0.11329
6VAX-F	2648	PRURIGO	19	3	3	2645	16	604559	42.80884	12.48086	146.83262	0.00008	True	0.11329
6VAX-F	2648	PRURITUS	30612	19	19	2629	30593	573982	0.14180	0.09058	0.22197	0.00000	True	0.71752
6VAX-F	2648	PSYCHIATRIC EVALUATION NORMAL	14	1	1	2647	13	604562	17.56260	2.29824	134.20945	0.05935	False	0.03776
6VAX-F	2648	PSYCHOMOTOR HYPERACTIVITY	420	9	9	2639	411	604164	4.99957	2.58573	9.66679	0.00012	True	0.33988
6VAX-F	2648	PSYCHOMOTOR RETARDATION	59	3	3	2645	56	604519	12.23110	3.83085	39.05130	0.00224	True	0.11329
6VAX-F	2648	PSYCHOMOTOR SKILLS IMPAIRED	72	15	15	2633	57	604518	60.08258	34.06359	105.97583	0.00000	True	0.56647
6VAX-F	2648	PULMONARY ARTERIAL PRESSURE INCREASED	1	1	1	2647	0	604575	-100.00000	-100.00000	-100.00000	0.00436	True	0.03776
6VAX-F	2648	PULMONARY ARTERIAL PRESSURE NORMAL	2	1	1	2647	1	604574	228.31382	14.28379	3649.39553	0.00870	True	0.03776
6VAX-F	2648	PULMONARY CONGESTION	219	1	1	2647	218	604357	1.04731	0.14692	7.46590	0.61607	False	0.03776
6VAX-F	2648	PULMONARY FUNCTION TEST NORMAL	52	2	2	2646	50	604525	9.13255	2.22328	37.51369	0.02182	True	0.07553
6VAX-F	2648	PULMONARY HAEMORRHAGE	70	1	1	2647	69	604506	3.30890	0.45971	23.81695	0.26357	False	0.03776
6VAX-F	2648	PULMONARY OEDEMA	271	1	1	2647	270	604305	0.84561	0.11872	6.02281	1.00000	False	0.03776
6VAX-F	2648	PULSE ABSENT	139	3	3	2645	136	604439	5.03633	1.60528	15.80080	0.02341	True	0.11329
6VAX-F	2648	PULSE PRESSURE DECREASED	122	1	1	2647	121	604454	1.88689	0.26374	13.49937	0.41330	False	0.03776
6VAX-F	2648	PUPIL FIXED	70	2	2	2646	68	604507	6.71511	1.64661	27.38527	0.03776	True	0.07553
6VAX-F	2648	PUPILLARY LIGHT REFLEX TESTS ABNORMAL	34	4	4	2644	30	604545	30.44184	10.73197	86.35003	0.00002	True	0.15106
6VAX-F	2648	PUPILLARY LIGHT REFLEX TESTS NORMAL	23	1	1	2647	22	604553	10.37790	1.39933	76.96613	0.09563	False	0.03776
6VAX-F	2648	PUPILLARY REFLEX IMPAIRED	53	1	1	2647	52	604523	4.39065	0.60719	31.74914	0.20677	False	0.03776
6VAX-F	2648	PUPILS UNEQUAL	56	5	5	2643	51	604524	22.38371	8.94080	56.03865	0.00000	True	0.18882
6VAX-F	2648	PURPURA	829	14	14	2634	815	603760	3.92196	2.31558	6.64272	0.00002	True	0.52870
6VAX-F	2648	PURPURA FULMINANS	11	1	1	2647	10	604565	22.83138	2.92363	178.29632	0.04694	True	0.03776
6VAX-F	2648	PURPURA NON-THROMBOCYTOPENIC	3	2	2	2646	1	604574	456.62764	41.41619	5034.47587	0.00006	True	0.07553
6VAX-F	2648	PURULENCE	38	2	2	2646	36	604539	12.68410	3.05553	52.65412	0.01204	True	0.07553
6VAX-F	2648	PURULENT DISCHARGE	155	2	2	2646	153	604422	2.98449	0.74007	12.03557	0.14722	False	0.07553
6VAX-F	2648	PUS IN STOOL	7	1	1	2647	6	604569	38.05230	4.58259	315.97384	0.03013	True	0.03776
6VAX-F	2648	PYELOCALIECTASIS	15	1	1	2647	14	604561	16.30813	2.14519	123.97716	0.06345	False	0.03776
6VAX-F	2648	PYELONEPHRITIS	100	7	7	2641	93	604482	17.18491	7.97887	37.01293	0.00000	True	0.26435
6VAX-F	2648	PYELONEPHRITIS ACUTE	21	5	5	2643	16	604559	71.34807	26.15643	194.61937	0.00000	True	0.18882
6VAX-F	2648	PYRAMIDAL TRACT SYNDROME	36	1	1	2647	35	604540	6.52325	0.89399	47.59888	0.14558	False	0.03776
6VAX-F	2648	PYREXIA	100453	703	703	1945	99750	504825	1.60907	1.50991	1.71474	0.00000	True	26.54834
6VAX-F	2648	PYRUVATE KINASE	1	1	1	2647	0	604575	-100.00000	-100.00000	-100.00000	0.00436	True	0.03776
6VAX-F	2648	PYURIA	19	1	1	2647	18	604557	12.68410	1.69385	94.98282	0.07968	False	0.03776
6VAX-F	2648	Q FEVER	6	3	3	2645	3	604572	228.31382	46.10139	1130.70779	0.00000	True	0.11329
6VAX-F	2648	QUADRIPARESIS	71	1	1	2647	70	604505	3.26163	0.45323	23.47197	0.26678	False	0.03776
6VAX-F	2648	QUALITY OF LIFE DECREASED	105	1	1	2647	104	604471	2.19533	0.30645	15.72671	0.36804	False	0.03776
6VAX-F	2648	RADIOALLERGOSORBENT TEST	35	1	1	2647	34	604541	6.71511	0.91953	49.03865	0.14184	False	0.03776
6VAX-F	2648	RADIOALLERGOSORBENT TEST NEGATIVE	52	1	1	2647	51	604524	4.47674	0.61887	32.38352	0.20329	False	0.03776
6VAX-F	2648	RADIOALLERGOSORBENT TEST POSITIVE	24	2	2	2646	22	604553	20.75580	4.88307	88.22394	0.00492	True	0.07553
6VAX-F	2648	RADIOISOTOPE SCAN NORMAL	6	1	1	2647	5	604570	45.66276	5.33639	390.72979	0.02588	True	0.03776
6VAX-F	2648	RALES	144	1	1	2647	143	604432	1.59660	0.22344	11.40837	0.46709	False	0.03776
6VAX-F	2648	RASH	42286	111	111	2537	42175	562400	0.60090	0.50075	0.72108	0.00000	True	4.19184
6VAX-F	2648	RASH ERYTHEMATOUS	7843	23	23	2625	7820	596755	0.67151	0.44676	1.00932	0.05697	False	0.86858
6VAX-F	2648	RASH GENERALISED	5160	32	32	2616	5128	599447	1.42474	1.00856	2.01264	0.05479	False	1.20846
6VAX-F	2648	RASH MACULAR	4100	29	29	2619	4071	600504	1.62641	1.13102	2.33878	0.01212	True	1.09517
6VAX-F	2648	RASH MACULO-PAPULAR	6869	19	19	2629	6850	597725	0.63328	0.40434	0.99185	0.04229	True	0.71752
6VAX-F	2648	RASH MORBILLIFORM	858	6	6	2642	852	603723	1.60784	0.72096	3.58574	0.28712	False	0.22659
6VAX-F	2648	RASH PAPULAR	3871	6	6	2642	3865	600710	0.35443	0.15928	0.78871	0.00448	True	0.22659
6VAX-F	2648	RASH PRURITIC	4238	3	3	2645	4235	600340	0.16173	0.05217	0.50135	0.00002	True	0.11329
6VAX-F	2648	RASH PUSTULAR	1047	1	1	2647	1046	603529	0.21827	0.03073	1.55047	0.10025	False	0.03776
6VAX-F	2648	RASH RUBELLIFORM	39	1	1	2647	38	604537	6.00826	0.82521	43.74555	0.15671	False	0.03776
6VAX-F	2648	RASH SCARLATINIFORM	22	1	1	2647	21	604554	10.87209	1.46293	80.79858	0.09167	False	0.03776
6VAX-F	2648	RASH VESICULAR	3868	2	2	2646	3866	600709	0.11811	0.02954	0.47220	0.00001	True	0.07553
6VAX-F	2648	REACTION TO DRUG EXCIPIENTS	42	3	3	2645	39	604536	17.56260	5.43070	56.79650	0.00084	True	0.11329
6VAX-F	2648	REACTION TO PREVIOUS EXPOSURE TO ANY VACCINE	121	2	2	2646	119	604456	3.83721	0.94908	15.51412	0.09837	False	0.07553
6VAX-F	2648	RECTAL DISCHARGE	6	1	1	2647	5	604570	45.66276	5.33639	390.72979	0.02588	True	0.03776
6VAX-F	2648	RECTAL HAEMORRHAGE	223	11	11	2637	212	604363	11.84647	6.46972	21.69164	0.00000	True	0.41541
6VAX-F	2648	RED BLOOD CELL ABNORMALITY	103	2	2	2646	101	604474	4.52107	1.11593	18.31666	0.07484	False	0.07553
6VAX-F	2648	RED BLOOD CELL ANALYSIS	8	2	2	2646	6	604569	76.10461	15.36713	376.90260	0.00052	True	0.07553
6VAX-F	2648	RED BLOOD CELL ANISOCYTES PRESENT	6	1	1	2647	5	604570	45.66276	5.33639	390.72979	0.02588	True	0.03776
6VAX-F	2648	RED BLOOD CELL COUNT	57	1	1	2647	56	604519	4.07703	0.56457	29.44204	0.22052	False	0.03776
6VAX-F	2648	RED BLOOD CELL COUNT DECREASED	319	15	15	2633	304	604271	11.26548	6.71770	18.89205	0.00000	True	0.56647
6VAX-F	2648	RED BLOOD CELL COUNT INCREASED	88	1	1	2647	87	604488	2.62430	0.36566	18.83422	0.31929	False	0.03776
6VAX-F	2648	RED BLOOD CELL COUNT NORMAL	480	37	37	2611	443	604132	19.06910	13.66503	26.61030	0.00000	True	1.39728
6VAX-F	2648	RED BLOOD CELL MICROCYTES PRESENT	4	1	1	2647	3	604572	76.10461	7.91863	731.42883	0.01733	True	0.03776
6VAX-F	2648	RED BLOOD CELL MORPHOLOGY ABNORMAL	9	1	1	2647	8	604567	28.53923	3.57061	228.10887	0.03857	True	0.03776
6VAX-F	2648	RED BLOOD CELL SCHISTOCYTES PRESENT	9	1	1	2647	8	604567	28.53923	3.57061	228.10887	0.03857	True	0.03776
6VAX-F	2648	RED BLOOD CELL SEDIMENTATION RATE	452	2	2	2646	450	604125	1.01473	0.25313	4.06780	0.72540	False	0.07553
6VAX-F	2648	RED BLOOD CELL SEDIMENTATION RATE INCREASED	1679	8	8	2640	1671	602904	1.09306	0.54630	2.18706	0.70984	False	0.30211
6VAX-F	2648	RED BLOOD CELL SEDIMENTATION RATE NORMAL	794	5	5	2643	789	603786	1.44686	0.60104	3.48294	0.40635	False	0.18882
6VAX-F	2648	RED BLOOD CELLS CSF POSITIVE	189	5	5	2643	184	604391	6.20418	2.55404	15.07098	0.00154	True	0.18882
6VAX-F	2648	RED BLOOD CELLS URINE POSITIVE	108	8	8	2640	100	604475	18.26511	8.89825	37.49209	0.00000	True	0.30211
6VAX-F	2648	RED CELL DISTRIBUTION WIDTH INCREASED	82	4	4	2644	78	604497	11.70840	4.28970	31.95713	0.00048	True	0.15106
6VAX-F	2648	RED CELL DISTRIBUTION WIDTH NORMAL	148	5	5	2643	143	604432	7.98300	3.27527	19.45741	0.00052	True	0.18882
6VAX-F	2648	REFLEX TEST NORMAL	49	1	1	2647	48	604527	4.75654	0.65677	34.44844	0.19278	False	0.03776
6VAX-F	2648	REFLEXES ABNORMAL	44	1	1	2647	43	604532	5.30962	0.73142	38.54449	0.17494	False	0.03776
6VAX-F	2648	REGRESSIVE BEHAVIOUR	120	1	1	2647	119	604456	1.91860	0.26814	13.72811	0.40815	False	0.03776
6VAX-F	2648	REGURGITATION	133	16	16	2632	117	604458	31.22240	18.54317	52.57131	0.00000	True	0.60423
6VAX-F	2648	RENAL DISORDER	121	1	1	2647	120	604455	1.90262	0.26592	13.61278	0.41073	False	0.03776
6VAX-F	2648	RENAL FAILURE	296	2	2	2646	294	604281	1.55316	0.38681	6.23638	0.37017	False	0.07553
6VAX-F	2648	RENAL FUNCTION TEST NORMAL	216	8	8	2640	208	604367	8.78130	4.33834	17.77437	0.00001	True	0.30211
6VAX-F	2648	RENAL IMPAIRMENT	173	1	1	2647	172	604403	1.32741	0.18598	9.47394	0.53054	False	0.03776
6VAX-F	2648	RENAL SCAN	4	1	1	2647	3	604572	76.10461	7.91863	731.42883	0.01733	True	0.03776
6VAX-F	2648	RESPIRATION ABNORMAL	240	13	13	2635	227	604348	13.07524	7.48627	22.83674	0.00000	True	0.49094
6VAX-F	2648	RESPIRATORY ARREST	862	44	44	2604	818	603757	12.28094	9.08965	16.59267	0.00000	True	1.66163
6VAX-F	2648	RESPIRATORY DEPRESSION	41	2	2	2646	39	604536	11.70840	2.82864	48.46372	0.01393	True	0.07553
6VAX-F	2648	RESPIRATORY DISORDER	1182	15	15	2633	1167	603408	2.93462	1.76597	4.87665	0.00029	True	0.56647
6VAX-F	2648	RESPIRATORY DISTRESS	673	16	16	2632	657	603918	5.56015	3.39114	9.11649	0.00000	True	0.60423
6VAX-F	2648	RESPIRATORY FAILURE	435	9	9	2639	426	604149	4.82353	2.49531	9.32408	0.00015	True	0.33988
6VAX-F	2648	RESPIRATORY RATE	106	1	1	2647	105	604470	2.17442	0.30356	15.57554	0.37080	False	0.03776
6VAX-F	2648	RESPIRATORY RATE DECREASED	124	1	1	2647	123	604452	1.85621	0.25949	13.27812	0.41841	False	0.03776
6VAX-F	2648	RESPIRATORY RATE INCREASED	566	8	8	2640	558	604017	3.27332	1.63058	6.57105	0.00383	True	0.30211
6VAX-F	2648	RESPIRATORY SYNCYTIAL VIRUS BRONCHIOLITIS	27	1	1	2647	26	604549	8.78130	1.19202	64.68934	0.11131	False	0.03776
6VAX-F	2648	RESPIRATORY SYNCYTIAL VIRUS INFECTION	128	3	3	2645	125	604450	5.47953	1.74464	17.20996	0.01889	True	0.11329
6VAX-F	2648	RESPIRATORY SYNCYTIAL VIRUS SEROLOGY	5	1	1	2647	4	604571	57.07846	6.38156	510.52564	0.02161	True	0.03776
6VAX-F	2648	RESPIRATORY SYNCYTIAL VIRUS TEST NEGATIVE	200	13	13	2635	187	604388	15.87208	9.05824	27.81147	0.00000	True	0.49094
6VAX-F	2648	RESPIRATORY SYNCYTIAL VIRUS TEST POSITIVE	79	9	9	2639	70	604505	29.35463	14.67928	58.70140	0.00000	True	0.33988
6VAX-F	2648	RESPIRATORY TRACT CONGESTION	1267	4	4	2644	1263	603312	0.72308	0.27116	1.92818	0.67053	False	0.15106
6VAX-F	2648	RESPIRATORY TRACT INFECTION	321	9	9	2639	312	604263	6.58598	3.39857	12.76276	0.00001	True	0.33988
6VAX-F	2648	RESPIRATORY TRACT INFLAMMATION	12	1	1	2647	11	604564	20.75580	2.68057	160.71348	0.05109	False	0.03776
6VAX-F	2648	RESPIROVIRUS TEST POSITIVE	7	1	1	2647	6	604569	38.05230	4.58259	315.97384	0.03013	True	0.03776
6VAX-F	2648	RESTLESS LEGS SYNDROME	96	1	1	2647	95	604480	2.40330	0.33518	17.23191	0.34268	False	0.03776
6VAX-F	2648	RESTLESSNESS	1167	124	124	2524	1043	603532	27.14373	22.62191	32.56941	0.00000	True	4.68278
6VAX-F	2648	RESTRICTIVE PULMONARY DISEASE	2	1	1	2647	1	604574	228.31382	14.28379	3649.39553	0.00870	True	0.03776
6VAX-F	2648	RESUSCITATION	446	44	44	2604	402	604173	24.98957	18.34903	34.03335	0.00000	True	1.66163
6VAX-F	2648	RETCHING	619	9	9	2639	610	603965	3.36856	1.74623	6.49813	0.00184	True	0.33988
6VAX-F	2648	RETICULOCYTE COUNT	31	4	4	2644	27	604548	33.82427	11.84358	96.59925	0.00001	True	0.15106
6VAX-F	2648	RETICULOCYTE COUNT DECREASED	10	1	1	2647	9	604566	25.36820	3.21500	200.16965	0.04276	True	0.03776
6VAX-F	2648	RETICULOCYTE COUNT INCREASED	29	6	6	2642	23	604552	59.56013	24.27150	146.15531	0.00000	True	0.22659
6VAX-F	2648	RETICULOCYTE PERCENTAGE	1	1	1	2647	0	604575	-100.00000	-100.00000	-100.00000	0.00436	True	0.03776
6VAX-F	2648	RETICULOCYTE PERCENTAGE INCREASED	20	5	5	2643	15	604560	76.10461	27.67942	209.24972	0.00000	True	0.18882
6VAX-F	2648	RETICULOCYTE PERCENTAGE NORMAL	10	1	1	2647	9	604566	25.36820	3.21500	200.16965	0.04276	True	0.03776
6VAX-F	2648	RETINAL DETACHMENT	25	1	1	2647	24	604551	9.51308	1.28739	70.29633	0.10350	False	0.03776
6VAX-F	2648	RETINAL DISORDER	42	1	1	2647	41	604534	5.56863	0.76625	40.46916	0.16770	False	0.03776
6VAX-F	2648	RETINAL FUNCTION TEST NORMAL	2	1	1	2647	1	604574	228.31382	14.28379	3649.39553	0.00870	True	0.03776
6VAX-F	2648	RETINAL HAEMORRHAGE	71	6	6	2642	65	604510	21.07512	9.14020	48.59419	0.00000	True	0.22659
6VAX-F	2648	RETINOGRAM ABNORMAL	4	1	1	2647	3	604572	76.10461	7.91863	731.42883	0.01733	True	0.03776
6VAX-F	2648	RHABDOMYOLYSIS	143	2	2	2646	141	604434	3.23849	0.80244	13.06988	0.12944	False	0.07553
6VAX-F	2648	RHABDOMYOMA	1	1	1	2647	0	604575	-100.00000	-100.00000	-100.00000	0.00436	True	0.03776
6VAX-F	2648	RHESUS ANTIBODIES POSITIVE	17	3	3	2645	14	604561	48.92439	14.06783	170.14675	0.00005	True	0.11329
6VAX-F	2648	RHEUMATOID FACTOR INCREASED	48	1	1	2647	47	604528	4.85774	0.67045	35.19651	0.18924	False	0.03776
6VAX-F	2648	RHINITIS	3188	30	30	2618	3158	601417	2.16891	1.51697	3.10103	0.00012	True	1.13293
6VAX-F	2648	RHINORRHOEA	3956	19	19	2629	3937	600638	1.10184	0.70319	1.72652	0.62751	False	0.71752
6VAX-F	2648	RHONCHI	51	1	1	2647	50	604525	4.56628	0.63101	33.04377	0.19980	False	0.03776
6VAX-F	2648	RIGHT HEMISPHERE DEFICIT SYNDROME	1	1	1	2647	0	604575	-100.00000	-100.00000	-100.00000	0.00436	True	0.03776
6VAX-F	2648	ROAD TRAFFIC ACCIDENT	91	1	1	2647	90	604485	2.53682	0.35360	18.19962	0.32816	False	0.03776
6VAX-F	2648	ROTAVIRUS INFECTION	729	13	13	2635	716	603859	4.14536	2.39840	7.16479	0.00003	True	0.49094
6VAX-F	2648	ROTAVIRUS TEST	57	2	2	2646	55	604520	8.30232	2.02617	34.01908	0.02589	True	0.07553
6VAX-F	2648	ROTAVIRUS TEST NEGATIVE	254	23	23	2625	231	604344	22.73255	14.83441	34.83580	0.00000	True	0.86858
6VAX-F	2648	ROTAVIRUS TEST POSITIVE	1252	35	35	2613	1217	603358	6.56613	4.70238	9.16856	0.00000	True	1.32175
6VAX-F	2648	RUBELLA	49	1	1	2647	48	604527	4.75654	0.65677	34.44844	0.19278	False	0.03776
6VAX-F	2648	RUBELLA ANTIBODY NEGATIVE	303	6	6	2642	297	604278	4.61240	2.05740	10.34037	0.00234	True	0.22659
6VAX-F	2648	RUBELLA ANTIBODY POSITIVE	115	3	3	2645	112	604463	6.11555	1.94412	19.23749	0.01424	True	0.11329
6VAX-F	2648	RUBULAVIRUS TEST POSITIVE	19	1	1	2647	18	604557	12.68410	1.69385	94.98282	0.07968	False	0.03776
6VAX-F	2648	SALIVA ALTERED	13	1	1	2647	12	604563	19.02615	2.47475	146.27523	0.05523	False	0.03776
6VAX-F	2648	SALIVARY HYPERSECRETION	588	14	14	2634	574	604001	5.56863	3.28164	9.44943	0.00000	True	0.52870
6VAX-F	2648	SALMONELLA TEST POSITIVE	46	1	1	2647	45	604530	5.07364	0.69961	36.79452	0.18212	False	0.03776
6VAX-F	2648	SALMONELLOSIS	29	2	2	2646	27	604548	16.91213	4.02367	71.08435	0.00714	True	0.07553
6VAX-F	2648	SANDIFER'S SYNDROME	5	1	1	2647	4	604571	57.07846	6.38156	510.52564	0.02161	True	0.03776
6VAX-F	2648	SCAB	807	5	5	2643	802	603773	1.42340	0.59133	3.42632	0.41105	False	0.18882
6VAX-F	2648	SCAN ABNORMAL	37	1	1	2647	36	604539	6.34205	0.86982	46.24120	0.14931	False	0.03776
6VAX-F	2648	SCAN NORMAL	51	3	3	2645	48	604527	14.26961	4.44742	45.78429	0.00148	True	0.11329
6VAX-F	2648	SCAN WITH CONTRAST ABNORMAL	32	1	1	2647	31	604544	7.36496	1.00575	53.93232	0.13052	False	0.03776
6VAX-F	2648	SCAN WITH CONTRAST NORMAL	35	2	2	2646	33	604542	13.83720	3.32198	57.63670	0.01028	True	0.07553
6VAX-F	2648	SCAR	229	4	4	2644	225	604350	4.05891	1.51131	10.90096	0.01861	True	0.15106
6VAX-F	2648	SCARLET FEVER	22	1	1	2647	21	604554	10.87209	1.46293	80.79858	0.09167	False	0.03776
6VAX-F	2648	SCLERAL DISORDER	2	1	1	2647	1	604574	228.31382	14.28379	3649.39553	0.00870	True	0.03776
6VAX-F	2648	SCRATCH	136	1	1	2647	135	604440	1.69121	0.23659	12.08931	0.44813	False	0.03776
6VAX-F	2648	SCREAMING	8034	113	113	2535	7921	596654	3.25710	2.71586	3.90619	0.00000	True	4.26737
6VAX-F	2648	SCROTAL SWELLING	16	1	1	2647	15	604560	15.22092	2.01124	115.19084	0.06754	False	0.03776
6VAX-F	2648	SEBORRHOEIC DERMATITIS	30	3	3	2645	27	604548	25.36820	7.70053	83.57159	0.00031	True	0.11329
6VAX-F	2648	SECRETION DISCHARGE	202	2	2	2646	200	604375	2.28314	0.56736	9.18773	0.22043	False	0.07553
6VAX-F	2648	SEDATION	38	1	1	2647	37	604538	6.17064	0.84693	44.95879	0.15302	False	0.03776
6VAX-F	2648	SEIZURE	1356	55	55	2593	1301	603274	9.65201	7.38953	12.60718	0.00000	True	2.07704
6VAX-F	2648	SEIZURE LIKE PHENOMENA	431	5	5	2643	426	604149	2.67974	1.11058	6.46602	0.04201	True	0.18882
6VAX-F	2648	SELECTIVE EATING DISORDER	23	3	3	2645	20	604555	34.24707	10.18269	115.18199	0.00014	True	0.11329
6VAX-F	2648	SELECTIVE IGA IMMUNODEFICIENCY	9	2	2	2646	7	604568	65.23252	13.55731	313.87366	0.00067	True	0.07553
6VAX-F	2648	SELECTIVE IGG SUBCLASS DEFICIENCY	5	2	2	2646	3	604572	152.20921	25.44289	910.57455	0.00019	True	0.07553
6VAX-F	2648	SENSORIMOTOR DISORDER	59	1	1	2647	58	604517	3.93645	0.54543	28.40979	0.22730	False	0.03776
6VAX-F	2648	SENSORY DISTURBANCE	987	1	1	2647	986	603589	0.23156	0.03260	1.64491	0.14184	False	0.03776
6VAX-F	2648	SEPSIS	1289	24	24	2624	1265	603310	4.33165	2.89763	6.47533	0.00000	True	0.90634
6VAX-F	2648	SEPSIS NEONATAL	11	1	1	2647	10	604565	22.83138	2.92363	178.29632	0.04694	True	0.03776
6VAX-F	2648	SEPTIC SHOCK	104	3	3	2645	101	604474	6.78160	2.15234	21.36743	0.01088	True	0.11329
6VAX-F	2648	SEROLOGY NEGATIVE	117	6	6	2642	111	604464	12.34129	5.43212	28.03829	0.00001	True	0.22659
6VAX-F	2648	SEROLOGY NORMAL	75	4	4	2644	71	604504	12.86275	4.70127	35.19273	0.00034	True	0.15106
6VAX-F	2648	SEROLOGY POSITIVE	97	1	1	2647	96	604479	2.37827	0.33173	17.05059	0.34555	False	0.03776
6VAX-F	2648	SEROLOGY TEST	129	10	10	2638	119	604456	19.18604	10.07432	36.53885	0.00000	True	0.37764
6VAX-F	2648	SERUM FERRITIN	17	1	1	2647	16	604559	14.26961	1.89302	107.56480	0.07160	False	0.03776
6VAX-F	2648	SERUM FERRITIN DECREASED	35	3	3	2645	32	604543	21.40442	6.55843	69.85657	0.00049	True	0.11329
6VAX-F	2648	SERUM FERRITIN NORMAL	77	5	5	2643	72	604503	15.85513	6.40984	39.21863	0.00002	True	0.18882
6VAX-F	2648	SERUM SICKNESS	719	1	1	2647	718	603857	0.31799	0.04475	2.25973	0.38657	False	0.03776
6VAX-F	2648	SEVERE MENTAL RETARDATION	7	1	1	2647	6	604569	38.05230	4.58259	315.97384	0.03013	True	0.03776
6VAX-F	2648	SEVERE MYOCLONIC EPILEPSY OF INFANCY	4	1	1	2647	3	604572	76.10461	7.91863	731.42883	0.01733	True	0.03776
6VAX-F	2648	SHIFT TO THE LEFT	27	1	1	2647	26	604549	8.78130	1.19202	64.68934	0.11131	False	0.03776
6VAX-F	2648	SHOCK	662	9	9	2639	653	603922	3.14674	1.63176	6.06831	0.00288	True	0.33988
6VAX-F	2648	SHUNT BLOOD FLOW EXCESSIVE	1	1	1	2647	0	604575	-100.00000	-100.00000	-100.00000	0.00436	True	0.03776
6VAX-F	2648	SHUNT MALFUNCTION	2	1	1	2647	1	604574	228.31382	14.28379	3649.39553	0.00870	True	0.03776
6VAX-F	2648	SICK RELATIVE	53	1	1	2647	52	604523	4.39065	0.60719	31.74914	0.20677	False	0.03776
6VAX-F	2648	SIMILAR REACTION ON PREVIOUS EXPOSURE TO DRUG	515	6	6	2642	509	604066	2.69132	1.20451	6.01343	0.02679	True	0.22659
6VAX-F	2648	SINUS RHYTHM	20	1	1	2647	19	604556	12.01652	1.60918	89.73289	0.08370	False	0.03776
6VAX-F	2648	SINUS TACHYCARDIA	124	6	6	2642	118	604457	11.60918	5.11628	26.34201	0.00002	True	0.22659
6VAX-F	2648	SINUSITIS	1085	2	2	2646	1083	603492	0.42163	0.10537	1.68718	0.34750	False	0.07553
6VAX-F	2648	SKELETAL SURVEY NORMAL	8	3	3	2645	5	604570	136.98829	32.75393	572.93256	0.00000	True	0.11329
6VAX-F	2648	SKIN DISCOLOURATION	2879	37	37	2611	2842	601733	2.97242	2.15398	4.10183	0.00000	True	1.39728
6VAX-F	2648	SKIN DISORDER	770	1	1	2647	769	603806	0.29690	0.04178	2.10967	0.27453	False	0.03776
6VAX-F	2648	SKIN EXFOLIATION	759	7	7	2641	752	603823	2.12526	1.01068	4.46900	0.05112	False	0.26435
6VAX-F	2648	SKIN HAEMORRHAGE	56	2	2	2646	54	604521	8.45607	2.06275	34.66495	0.02506	True	0.07553
6VAX-F	2648	SKIN HYPOPIGMENTATION	18	1	1	2647	17	604558	13.43022	1.78791	100.88385	0.07565	False	0.03776
6VAX-F	2648	SKIN INDURATION	75	1	1	2647	74	604501	3.08532	0.42905	22.18653	0.27949	False	0.03776
6VAX-F	2648	SKIN LESION	2455	7	7	2641	2448	602127	0.65286	0.31121	1.36956	0.35349	False	0.26435
6VAX-F	2648	SKIN LESION EXCISION	8	1	1	2647	7	604568	32.61626	4.01417	265.01630	0.03436	True	0.03776
6VAX-F	2648	SKIN PLAQUE	184	4	4	2644	180	604395	5.07364	1.88507	13.65563	0.00897	True	0.15106
6VAX-F	2648	SKIN REACTION	466	2	2	2646	464	604111	0.98411	0.24551	3.94470	1.00000	False	0.07553
6VAX-F	2648	SKIN STRIAE	353	1	1	2647	352	604223	0.64862	0.09114	4.61587	1.00000	False	0.03776
6VAX-F	2648	SKIN TEST POSITIVE	177	6	6	2642	171	604404	8.01101	3.55242	18.06552	0.00014	True	0.22659
6VAX-F	2648	SKIN TURGOR DECREASED	41	3	3	2645	38	604537	18.02478	5.56747	58.35552	0.00078	True	0.11329
6VAX-F	2648	SKIN ULCER	2887	4	4	2644	2883	601692	0.31677	0.11890	0.84397	0.01000	True	0.15106
6VAX-F	2648	SKIN WARM	10767	32	32	2616	10735	593840	0.68058	0.48205	0.96087	0.02647	True	1.20846
6VAX-F	2648	SKIN WOUND	13	1	1	2647	12	604563	19.02615	2.47475	146.27523	0.05523	False	0.03776
6VAX-F	2648	SKULL X-RAY	14	1	1	2647	13	604562	17.56260	2.29824	134.20945	0.05935	False	0.03776
6VAX-F	2648	SKULL X-RAY ABNORMAL	7	1	1	2647	6	604569	38.05230	4.58259	315.97384	0.03013	True	0.03776
6VAX-F	2648	SLEEP APNOEA SYNDROME	120	2	2	2646	118	604457	3.86973	0.95703	15.64713	0.09701	False	0.07553
6VAX-F	2648	SLEEP DISORDER	2677	19	19	2629	2658	601917	1.63204	1.04101	2.55863	0.03846	True	0.71752
6VAX-F	2648	SLEEP PHASE RHYTHM DISTURBANCE	11	2	2	2646	9	604566	50.73640	10.96729	234.71467	0.00102	True	0.07553
6VAX-F	2648	SLEEP STUDY	79	3	3	2645	76	604499	9.01239	2.84484	28.55103	0.00512	True	0.11329
6VAX-F	2648	SLEEP STUDY ABNORMAL	75	2	2	2646	73	604502	6.25517	1.53594	25.47446	0.04278	True	0.07553
6VAX-F	2648	SLEEP STUDY NORMAL	41	8	8	2640	33	604542	55.34881	25.58976	119.71549	0.00000	True	0.30211
6VAX-F	2648	SLEEP TERROR	45	1	1	2647	44	604531	5.18895	0.71516	37.64919	0.17854	False	0.03776
6VAX-F	2648	SLOW RESPONSE TO STIMULI	100	12	12	2636	88	604487	31.13370	17.05344	56.83942	0.00000	True	0.45317
6VAX-F	2648	SLUGGISHNESS	212	3	3	2645	209	604366	3.27723	1.04911	10.23751	0.06652	False	0.11329
6VAX-F	2648	SMALL INTESTINAL ANASTOMOSIS	3	1	1	2647	2	604573	114.15691	10.35405	1258.61897	0.01303	True	0.03776
6VAX-F	2648	SMALL INTESTINAL HAEMORRHAGE	1	1	1	2647	0	604575	-100.00000	-100.00000	-100.00000	0.00436	True	0.03776
6VAX-F	2648	SMALL INTESTINAL INTUSSUSCEPTION REDUCTION	10	2	2	2646	8	604567	57.07846	12.12635	268.66696	0.00084	True	0.07553
6VAX-F	2648	SMALL INTESTINAL OBSTRUCTION	25	1	1	2647	24	604551	9.51308	1.28739	70.29633	0.10350	False	0.03776
6VAX-F	2648	SMALL INTESTINAL RESECTION	17	2	2	2646	15	604560	30.44184	6.96486	133.05447	0.00248	True	0.07553
6VAX-F	2648	SMEAR SITE UNSPECIFIED ABNORMAL	18	6	6	2642	12	604563	114.15691	42.87623	303.93997	0.00000	True	0.22659
[truncated: 130,094 more rows]
